# Supplementary material
Source: Frontiers journal article supplement (https://www.frontiersin.org/articles/279888)
Supplement: Data_Sheet_1.XLS [file Data_Sheet_1.XLS]

## Sheet: reactions
Rxn name	Rxn description	Formula	Gene-reaction association	Genes	Gene symbols	Subsystem	Reversible	LB	UB	Objective	ConfidenceScore	E.C. number	Notes	References
ACTS1	Malonyl-CoA-ACP transacylase (actinorhodin ACP)	ACPact[c] + malcoa[c] <=> coa[c] + malACPact[c]	SCO5089	SCO5089	actIORF3	Actinorhodin Biosynthesis	1	-1000	1000	0	4	2.3.1.39		Arthur CJ, Szafranska A, Evans SE, Findlow SC, Burston SG, Owen P, Clark-Lewis I, Simpson TJ, Crosby J, Crump MP.#2005#Self-malonylation is an intrinsic property of a chemically synthesized type II polyketide synthase acyl carrier protein.#Biochemistry.#44#15414-15421#
ACTS10	actIII ketoacyl reductase	actint1ACPact[c] + nadph[c] + h[c] -> actint2ACPact[c] + nadp[c]	SCO5086	SCO5086	actIII	Actinorhodin Biosynthesis	0	0	1000	0	4			Hadfield AT, Limpkin C, Teartasin W, Simpson TJ, Crosby J, Crump MP.#2004#The crystal structure of the actIII actinorhodin polyketide reductase: proposed mechanism for ACP and polyketide binding.#Structure.#12#1865-1875#
ACTS11	actVII aromatase	actint2ACPact[c] -> actint3ACPact[c] + 2 h2o[c]	SCO5090	SCO5090	actVII	Actinorhodin Biosynthesis	0	0	1000	0	4			McDaniel R, Ebert-Khosla S, Hopwood DA, Khosla C.#1994#Engineered Biosynthesis of Novel Polyketides: actVII and actIV Genes Encode Aromatase and Cyclase Enzymes, Respectively#J Am Chem Soc.#116#10855-10859#
ACTS12	actIV cyclase	actint3ACPact[c] -> actint4ACPact[c] + h2o[c]	SCO5091	SCO5091	actIV	Actinorhodin Biosynthesis	0	0	1000	0	4			McDaniel R, Ebert-Khosla S, Hopwood DA, Khosla C.#1994#Engineered Biosynthesis of Novel Polyketides: actVII and actIV Genes Encode Aromatase and Cyclase Enzymes, Respectively#J Am Chem Soc.#116#10855-10859#
ACTS13	hydroxylacyl-CoA dehydrogenase	actint4ACPact[c] + nadph[c] + h[c] -> actint5ACPact[c] + nadp[c]	SCO5072	SCO5072	actVIORF1	Actinorhodin Biosynthesis	0	0	1000	0	3			Taguchi T, Itou K, Ebizuka Y, Malpartida F, Hopwood DA, Surti CM, Booker-Milburn KI, Stephenson GR, Ichinose K.#2000#Chemical characterisation of disruptants of the Streptomyces coelicolor A3(2) actVI genes involved in actinorhodin biosynthesis.#J Antibiot (Tokyo).#53#144-152#
ACTS14	actVI dehydratase	actint5ACPact[c] -> dnpaACPact[c] + h2o[c]	(SCO5071 or SCO5072 or SCO5074)	SCO5071 SCO5072 SCO5074	actVIORFA actVIORF1 actVIORF3	Actinorhodin Biosynthesis	0	0	1000	0	3			Taguchi T, Itou K, Ebizuka Y, Malpartida F, Hopwood DA, Surti CM, Booker-Milburn KI, Stephenson GR, Ichinose K.#2000#Chemical characterisation of disruptants of the Streptomyces coelicolor A3(2) actVI genes involved in actinorhodin biosynthesis.#J Antibiot (Tokyo).#53#144-152#
ACTS15	actVI oxidoreductase	dnpaACPact[c] + nadph[c] + h[c] -> ddhkACPact[c] + nadp[c]	(SCO5023 or SCO5075)	SCO5023 SCO5075	actVIORF4	Actinorhodin Biosynthesis	0	0	1000	0	3			Taguchi T, Itou K, Ebizuka Y, Malpartida F, Hopwood DA, Surti CM, Booker-Milburn KI, Stephenson GR, Ichinose K.#2000#Chemical characterisation of disruptants of the Streptomyces coelicolor A3(2) actVI genes involved in actinorhodin biosynthesis.#J Antibiot (Tokyo).#53#144-152#
ACTS16	actVA-5/actVB monooxygenase	ddhkACPact[c] + o2[c] -> dhkACPact[c] + h2o[c]	((SCO5080 and SCO5092) or SCO5081)	SCO5080 SCO5092 SCO5081	actVA5 actVB actVA6	Actinorhodin Biosynthesis	0	0	1000	0	4			Okamoto S, Taguchi T, Ochi K, Ichinose K.#2009#Biosynthesis of actinorhodin and related antibiotics: discovery of alternative routes for quinone formation encoded in the act gene cluster.#Chem Biol.#16#226-236##Kendrew SG, Hopwood DA, Marsh EN.#1997#Identification of a monooxygenase from Streptomyces coelicolor A3(2) involved in biosynthesis of actinorhodin: purification and characterization of t…
ACTS17	actVA-5/actVB monooxygenase 2	dhkACPact[c] + nadh[c] + h[c] + o2[c] -> hdhkACPact[c] + nad[c] + h2o[c]	(SCO5080 and SCO5092)	SCO5080 SCO5092	actVA5 actVB	Actinorhodin Biosynthesis	0	0	1000	0	4			Valton J, Mathevon C, Fontecave M, Nivière V, Ballou DP.#2008#Mechanism and regulation of the Two-component FMN-dependent monooxygenase ActVA-ActVB from Streptomyces coelicolor.#J Biol Chem.#283#10287-10296#
ACTS18	hydroxylated dihydrokalafungin thioesterase	hdhkACPact[c] + h2o[c] -> hdhk[c] + h[c] + ACPact[c]				Actinorhodin Biosynthesis	0	0	1000	0	1		Required to produce actinorhodin
ACTS19	hydroxylated dihydrokalafungin dimerization	2 hdhk[c] + nad[c] -> ACT[c] + nadh[c] + h[c]				Actinorhodin Biosynthesis	0	0	1000	0	1		Required to produce actinorhodin
ACTS2	polyketide chain elongation 1	accoa[c] + h[c] + malACPact[c] -> actACPact[c] + co2[c] + coa[c]	(SCO5087 and SCO5088)	SCO5087 SCO5088	actIORF1 actIORF2	Actinorhodin Biosynthesis	0	0	1000	0	4			Matharu AL, Cox RJ, Crosby J, Byrom KJ, Simpson TJ.#1998#MCAT is not required for in vitro polyketide synthesis in a minimal actinorhodin polyketide synthase from Streptomyces coelicolor.#Chem Biol.#5#699-711#
ACTS3	polyketide chain elongation 2	malcoa[c] + h[c] + actACPact[c] -> pk6ACPact[c] + coa[c] + co2[c]	(SCO5087 and SCO5088)	SCO5087 SCO5088	actIORF1 actIORF2	Actinorhodin Biosynthesis	0	0	1000	0	4			Matharu AL, Cox RJ, Crosby J, Byrom KJ, Simpson TJ.#1998#MCAT is not required for in vitro polyketide synthesis in a minimal actinorhodin polyketide synthase from Streptomyces coelicolor.#Chem Biol.#5#699-711#
ACTS4	polyketide chain elongation 3	malcoa[c] + h[c] + pk6ACPact[c] -> pk8ACPact[c] + coa[c] + co2[c]	(SCO5087 and SCO5088)	SCO5087 SCO5088	actIORF1 actIORF2	Actinorhodin Biosynthesis	0	0	1000	0	4			Matharu AL, Cox RJ, Crosby J, Byrom KJ, Simpson TJ.#1998#MCAT is not required for in vitro polyketide synthesis in a minimal actinorhodin polyketide synthase from Streptomyces coelicolor.#Chem Biol.#5#699-711#
ACTS5	polyketide chain elongation 4	malcoa[c] + h[c] + pk8ACPact[c] -> pk10ACPact[c] + coa[c] + co2[c]	(SCO5087 and SCO5088)	SCO5087 SCO5088	actIORF1 actIORF2	Actinorhodin Biosynthesis	0	0	1000	0	4			Matharu AL, Cox RJ, Crosby J, Byrom KJ, Simpson TJ.#1998#MCAT is not required for in vitro polyketide synthesis in a minimal actinorhodin polyketide synthase from Streptomyces coelicolor.#Chem Biol.#5#699-711#
ACTS6	polyketide chain elongation 5	malcoa[c] + h[c] + pk10ACPact[c] -> pk12ACPact[c] + coa[c] + co2[c]	(SCO5087 and SCO5088)	SCO5087 SCO5088	actIORF1 actIORF2	Actinorhodin Biosynthesis	0	0	1000	0	4			Matharu AL, Cox RJ, Crosby J, Byrom KJ, Simpson TJ.#1998#MCAT is not required for in vitro polyketide synthesis in a minimal actinorhodin polyketide synthase from Streptomyces coelicolor.#Chem Biol.#5#699-711#
ACTS7	polyketide chain elongation 6	malcoa[c] + h[c] + pk12ACPact[c] -> pk14ACPact[c] + coa[c] + co2[c]	(SCO5087 and SCO5088)	SCO5087 SCO5088	actIORF1 actIORF2	Actinorhodin Biosynthesis	0	0	1000	0	4			Matharu AL, Cox RJ, Crosby J, Byrom KJ, Simpson TJ.#1998#MCAT is not required for in vitro polyketide synthesis in a minimal actinorhodin polyketide synthase from Streptomyces coelicolor.#Chem Biol.#5#699-711#
ACTS8	polyketide chain elongation 7	malcoa[c] + h[c] + pk14ACPact[c] -> pk16ACPact[c] + coa[c] + co2[c]	(SCO5087 and SCO5088)	SCO5087 SCO5088	actIORF1 actIORF2	Actinorhodin Biosynthesis	0	0	1000	0	4			Matharu AL, Cox RJ, Crosby J, Byrom KJ, Simpson TJ.#1998#MCAT is not required for in vitro polyketide synthesis in a minimal actinorhodin polyketide synthase from Streptomyces coelicolor.#Chem Biol.#5#699-711#
ACTS9	actI cyclase	pk16ACPact[c] -> actint1ACPact[c]	(SCO5087 and SCO5088)	SCO5087 SCO5088	actIORF1 actIORF2	Actinorhodin Biosynthesis	0	0	1000	0	4			Matharu AL, Cox RJ, Crosby J, Byrom KJ, Simpson TJ.#1998#MCAT is not required for in vitro polyketide synthesis in a minimal actinorhodin polyketide synthase from Streptomyces coelicolor.#Chem Biol.#5#699-711#
ALAD_L	L-alanine dehydrogenase	ala-L[c] + h2o[c] + nad[c] -> h[c] + nadh[c] + nh4[c] + pyr[c]	SCO1773	SCO1773		Alanine and Aspartate Metabolism	0	0	1000	0	2	4.3.1.17
ALAR	alanine racemase	ala-L[c] <=> ala-D[c]	SCO4745	SCO4745	alr	Alanine and Aspartate Metabolism	1	-1000	1000	0	2	5.1.1.1
ALATA_L	L-alanine transaminase	akg[c] + ala-L[c] <=> glu-L[c] + pyr[c]	(SCO4984 or SCO6222)	SCO4984 SCO6222	alaT	Alanine and Aspartate Metabolism	1	-1000	1000	0	2	2.6.1.2
APAT2r	3-Aminopropanoate:2-oxoglutarate aminotransferase	akg[c] + ala-B[c] <=> glu-L[c] + msa[c]	(SCO5676 or SCO7034 or SCO3622)	SCO5676 SCO7034 SCO3622	gabT	Alanine and Aspartate Metabolism	1	-1000	1000	0	2	2.6.1.19
ASNN	L-asparaginase	asn-L[c] + h2o[c] -> asp-L[c] + nh4[c]				Alanine and Aspartate Metabolism	0	0	1000	0	1	3.5.1.1	Required for growth using L-asparagine as a carbon source
ASNS1	asparagine synthase (glutamine-hydrolysing)	asp-L[c] + atp[c] + gln-L[c] + h2o[c] -> amp[c] + asn-L[c] + glu-L[c] + h[c] + ppi[c]	SCO0386	SCO0386		Alanine and Aspartate Metabolism	0	0	1000	0	2	6.3.5.4
ASPO1	L-aspartate oxidase	asp-L[c] + h2o[c] + o2[c] -> h2o2[c] + nh4[c] + oaa[c]	SCO3382	SCO3382	nadB	Alanine and Aspartate Metabolism	0	0	1000	0	2	1.4.3.16
ASPTA	aspartate transaminase	akg[c] + asp-L[c] <=> glu-L[c] + oaa[c]	(SCO4645 or SCO3658)	SCO4645 SCO3658	aspC	Alanine and Aspartate Metabolism	1	-1000	1000	0	2	2.6.1.1
3OXCOAT	3-oxoadipyl-CoA thiolase	coa[c] + oxadpcoa[c] -> accoa[c] + succoa[c]	(SCO6701 or SCO6967 or SCO3079 or SCO6731)	SCO6701 SCO6967 SCO3079 SCO6731	pcaF	Alternate Carbon Metabolism	0	0	1000	0	2			$Escherichia coli and Pseudomonas putida#Teufel R, Mascaraque V, Ismail W, Voss M, Perera J, Eisenreich W, Haehnel W, Fuchs G.#2010#Bacterial phenylalanine and phenylacetate catabolic pathway revealed.#Proc Natl Acad Sci U S A.#107#107-132#
5DGLCNR	5-dehydro-D-gluconate reductase	5dglcn[c] + h[c] + nadph[c] <=> glcn[c] + nadp[c]	SCO1681	SCO1681		Alternate Carbon Metabolism	1	-1000	1000	0	2	1.1.1.69
6PHBG	6-phospho-beta-glucosidase	h2o[c] + salc6p[c] -> 2hymeph[c] + g6p[c]	(SCO2661 or SCO6670)	SCO2661 SCO6670		Alternate Carbon Metabolism	0	0	1000	0	2	3.2.1.86
AAMYLe	alpha-amylase	14glucan[e] -> malthx[e]	SCO2226	SCO2226		Alternate Carbon Metabolism	0	0	1000	0	2
ACM6PH	N-acetylmuramate 6-phosphate hydrolase	acmum6p[c] + h2o[c] -> acgam6p[c] + lac-D[c]	SCO4307	SCO4307	murQ	Alternate Carbon Metabolism	0	0	1000	0	2
ACS2	acetyl-CoA synthase (propionate)	atp[c] + coa[c] + ppa[c] -> amp[c] + ppi[c] + ppcoa[c]	SCO3563	SCO3563	acsA	Alternate Carbon Metabolism	0	0	1000	0	2	6.2.1.1
ADNUC	adenosine hydrolase	adn[c] + h2o[c] -> ade[c] + rib-D[c]	SCO3779	SCO3779		Alternate Carbon Metabolism	0	0	1000	0	2	3.2.2.8
AGDC	N-acetylglucosamine-6-phosphate deacetylase	acgam6p[c] + h2o[c] -> ac[c] + gam6p[c]	SCO4284	SCO4284	nagA	Alternate Carbon Metabolism	0	0	1000	0	3	3.5.1.25		Świątek MA, Tenconi E, Rigali S, van Wezel GP.#2012#Functional analysis of the N-acetylglucosamine metabolic genes of Streptomyces coelicolor and role in control of development and antibiotic production.#J Bacteriol.#194#1136-1144#
ALCD19	alcohol dehydrogenase (glycerol)	glyald[c] + h[c] + nadh[c] <=> glyc[c] + nad[c]	(SCO0199 or SCO0259 or SCO5262 or SCO7362)	SCO0199 SCO0259 SCO5262 SCO7362		Alternate Carbon Metabolism	1	-1000	1000	0	2	1.1.1.1
ALCD19y	alcohol dehydrogenase (glycerol, NADP)	glyald[c] + h[c] + nadph[c] <=> glyc[c] + nadp[c]	(SCO4945 or SCO4271)	SCO4945 SCO4271		Alternate Carbon Metabolism	1	-1000	1000	0	2	1.1.1.2
ALDD1	aldehyde dehydrogenase (formaldehyde, NAD)	fald[c] + h2o[c] + nad -> for[c] + 2 h[c] + nadh[c]	SCO4055	SCO4055		Alternate Carbon Metabolism	0	0	1000	0	2	1.2.1.46
ALDD19x	aldehyde dehydrogenase (phenylacetaldehyde, NAD)	h2o[c] + nad[c] + pacald[c] -> 2 h[c] + nadh[c] + pac[c]	SCO1612	SCO1612		Alternate Carbon Metabolism	0	0	1000	0	2	1.2.1.39
ALDD2x	aldehyde dehydrogenase (acetaldehyde, NAD)	acald[c] + h2o[c] + nad[c] -> ac[c] + 2 h[c] + nadh[c]	(SCO1174 or SCO1706 or SCO3420 or SCO4913 or SCO5679)	SCO1174 SCO1706 SCO3420 SCO4913 SCO5679	thcA	Alternate Carbon Metabolism	0	0	1000	0	2	1.2.1.3
ALLTAMH	allantoate amidohydrolase	alltt[c] + 2 h[c] + 2 h2o[c] -> co2[c] + 2 nh4[c] + urdglyc[c]	SCO3072	SCO3072		Alternate Carbon Metabolism	0	0	1000	0	2	3.5.3.9
AMALT1	Amylomaltase (maltotriose)	malt[c] + malttr[c] -> glc-D[c] + maltttr[c]	SCO2649	SCO2649		Alternate Carbon Metabolism	0	0	1000	0	2	2.4.1.25
AMALT2	Amylomaltase (maltotetraose)	malt[c] + maltttr[c] -> glc-D[c] + maltpt[c]	SCO2649	SCO2649		Alternate Carbon Metabolism	0	0	1000	0	2	2.4.1.25
AMALT3	Amylomaltase (maltopentaose)	malt[c] + maltpt[c] -> glc-D[c] + malthx[c]	SCO2649	SCO2649		Alternate Carbon Metabolism	0	0	1000	0	2	2.4.1.25
AMALT4	Amylomaltase (maltohexaose)	malt[c] + malthx[c] -> glc-D[c] + malthp[c]	SCO2649	SCO2649		Alternate Carbon Metabolism	0	0	1000	0	2	2.4.1.25
ARAI	L-arabinose isomerase	arab-L[c] <=> rbl-L[c]				Alternate Carbon Metabolism	1	-1000	1000	0	1	5.3.1.4	Required for growth using L-arabinose as a carbon source
BGLU	b-glucosidase (cellobiose)	h2o[c] + celb[c] -> 2 glc-D[c]	(SCO0293 or SCO0458 or SCO1059 or SCO2531 or SCO2798 or SCO5685 or SCO6597 or SCO6604 or SCO7031 or SCO7558)	SCO0293 SCO0458 SCO1059 SCO2531 SCO2798 SCO5685 SCO6597 SCO6604 SCO7031 SCO7558		Alternate Carbon Metabolism	0	0	1000	0	2	3.2.1.21
CYTDH	Cytidine hydrolase	cytd[c] + h2o[c] -> csn[c] + rib-D[c]	SCO3779	SCO3779		Alternate Carbon Metabolism	0	0	1000	0	2	3.2.2.8
DABTD	D-arabinitol 4-dehydrogenase (NAD)	abt-D[c] + nad[c] -> xylu-D[c] + h[c] + nadh[c]				Alternate Carbon Metabolism	0	0	1000	0	1	1.1.1.11	Required for growth using D-arabitol as a carbon source
DCH	diacetylchitobiose hydrolase	chtbs[c] + h2o[c] -> 2 acgam[c]	(SCO2758 or SCO2786 or SCO2943 or SCO4860)	SCO2758 SCO2786 SCO2943 SCO4860	hexA	Alternate Carbon Metabolism	0	0	1000	0	2
DDGLK	2-dehydro-3-deoxygluconokinase	2ddglcn[c] + atp[c] -> 2ddg6p[c] + adp[c] + h[c]	(SCO0851 or SCO3474 or SCO3494)	SCO0851 SCO3474 SCO3494		Alternate Carbon Metabolism	0	0	1000	0	2	2.7.1.45
DHACOAH	2,3-dehydroadipyl-CoA hydratase	23dhacoa[c] + h2o[c] <=> 3hadpcoa[c]	(SCO6732 or SCO4384)	SCO6732 SCO4384		Alternate Carbon Metabolism	1	-1000	1000	0	2			$Escherichia coli and Pseudomonas putida#Teufel R, Mascaraque V, Ismail W, Voss M, Perera J, Eisenreich W, Haehnel W, Fuchs G.#2010#Bacterial phenylalanine and phenylacetate catabolic pathway revealed.#Proc Natl Acad Sci U S A.#107#107-132#
DHAK	dihydroxyacetone kinase	atp[c] + dha[c] -> adp[c] + dhap[c] + h[c]	SCO0580	SCO0580		Alternate Carbon Metabolism	0	0	1000	0	2	2.7.1.29
DHDGLCD	5-dehydro-4-deoxyglucarate dehydratase	5dh4dglc[c] + h[c] -> 25dptn[c] + h2o[c] + co2[c]	(SCO1895 or SCO2543)	SCO1895 SCO2543		Alternate Carbon Metabolism	0	0	1000	0	2	4.2.1.41
DRBK	Deoxyribokinase	atp[c] + drib[c] -> 2dr5p[c] + adp[c] + h[c]	SCO2748	SCO2748		Alternate Carbon Metabolism	0	0	1000	0	2	2.7.1.15
DRPA	deoxyribose-phosphate aldolase	2dr5p[c] -> acald[c] + g3p[c]	SCO4914	SCO4914		Alternate Carbon Metabolism	0	0	1000	0	2	4.1.2.4
DTARTD	D(-)-tartrate dehydratase	tartr-D[c] -> h2o[c] + oaa[c]	SCO5044	SCO5044	fumB	Alternate Carbon Metabolism	0	0	1000	0	2	4.2.1.81
EPMGH	epimelibiose galactohydrolase	epm[c] + h2o[c] -> gal[c] + man[c]	(SCO0274 or SCO0541)	SCO0274 SCO0541		Alternate Carbon Metabolism	0	0	1000	0	2	3.2.1.22
FDH	formate dehydrogenase	for[c] + nad[c] -> co2[c] + nadh[c]	SCO6561	SCO6561		Alternate Carbon Metabolism	0	0	1000	0	2	1.2.1.2
FORCT	Formyl-CoA Transferase	forcoa[c] + oxa[c] <=> for[c] + oxalcoa[c]	SCO6583	SCO6583		Alternate Carbon Metabolism	1	-1000	1000	0	2
FRUK	fructose-1-phosphate kinase	atp[c] + f1p[c] -> adp[c] + fdp[c] + h[c]	SCO3197	SCO3197		Alternate Carbon Metabolism	0	0	1000	0	2	2.7.1.56
G3PD2	glycerol-3-phosphate dehydrogenase (NADP)	glyc3p[c] + nadp[c] <=> dhap[c] + h[c] + nadph[c]	SCO5559	SCO5559	gspA	Alternate Carbon Metabolism	1	-1000	1000	0	2	1.1.1.94
G6PDA	glucosamine-6-phosphate deaminase	gam6p[c] + h2o[c] -> f6p[c] + nh4[c]	SCO5236	SCO5236	nagB	Alternate Carbon Metabolism	0	0	1000	0	3	3.5.99.6		Świątek MA, Tenconi E, Rigali S, van Wezel GP.#2012#Functional analysis of the N-acetylglucosamine metabolic genes of Streptomyces coelicolor and role in control of development and antibiotic production.#J Bacteriol.#194#1136-1144#
GAL6PI	galactose-6-phosphate isomerase	dgal6p[c] <=> tag6p-D[c]	SCO5849	SCO5849	agaS	Alternate Carbon Metabolism	1	-1000	1000	0	2
GALCTND	galactonate dehydratase	galctn-D[c] -> 2dh3dgal[c] + h2o[c]	(SCO2401 or SCO3475)	SCO2401 SCO3475		Alternate Carbon Metabolism	0	0	1000	0	2	4.2.1.6
GALIGH	1-alpha-D-Galactosyl-myo-inositol galactohydrolase	1Dgali[c] + h2o[c] -> gal[c] + inost[c]	(SCO0274 or SCO0541)	SCO0274 SCO0541		Alternate Carbon Metabolism	0	0	1000	0	2	3.2.1.22
GALKr	galactokinase	atp[c] + gal[c] <=> adp[c] + gal1p[c] + h[c]	SCO3136	SCO3136	galK	Alternate Carbon Metabolism	1	-1000	1000	0	2	2.7.1.6
GALS3	a-galactosidase (melibiose)	h2o[c] + melib[c] -> gal[c] + glc-D[c]	(SCO0274 or SCO0541)	SCO0274 SCO0541		Alternate Carbon Metabolism	0	0	1000	0	2	3.2.1.22
GGLGH	galactosylglycerol galactohydrolase	ggl[c] + h2o[c] -> gal[c] + glyc[c]	(SCO0274 or SCO0541)	SCO0274 SCO0541		Alternate Carbon Metabolism	0	0	1000	0	2	3.2.1.22
GLCATr	D-glucose O-acetyltransferase	accoa[c] + glc-D[c] <=> acglc-D[c] + coa[c]	SCO7519	SCO7519		Alternate Carbon Metabolism	1	-1000	1000	0	2	2.3.1.79
GLCRAL	5-dehydro-4-deoxyglucarate aldolase	5dh4dglc[c] -> 2h3oppan[c] + pyr[c]				Alternate Carbon Metabolism	0	0	1000	0	1	4.1.2.20	Required for growth using glucarate as a carbon source
GLCRD	glucarate dehydratase	glcr[c] -> 5dh4dglc[c] + h2o[c]	SCO2542	SCO2542		Alternate Carbon Metabolism	0	0	1000	0	2	4.2.1.40
GLYALDDr	D-Glyceraldehyde dehydrogenase	glyald[c] + h2o[c] + nad[c] <=> glyc-R[c] + 2 h[c] + nadh[c]	(SCO1174 or SCO1706 or SCO3420 or SCO4913 or SCO5679)	SCO1174 SCO1706 SCO3420 SCO4913 SCO5679	thcA	Alternate Carbon Metabolism	1	-1000	1000	0	2	1.2.1.3
GLYCDx	Glycerol dehydrogenase	glyc[c] + nad[c] -> dha[c] + h[c] + nadh[c]	SCO6754	SCO6754		Alternate Carbon Metabolism	0	0	1000	0	2	1.1.1.6
GLYCTO1	Glycolate oxidase	glyclt[c] + o2[c] -> glx[c] + h2o2[c]	SCO2925	SCO2925		Alternate Carbon Metabolism	0	0	1000	0	2
GLYCTO3	Glycolate oxidase	glyclt[c] + mqn9[c] -> glx[c] + mql9[c]	SCO2925	SCO2925		Alternate Carbon Metabolism	0	0	1000	0	2
GLYK	glycerol kinase	atp[c] + glyc[c] -> adp[c] + glyc3p[c] + h[c]	(SCO0509 or SCO1660 or SCO7004)	SCO0509 SCO1660 SCO7004	glpK2 glpK	Alternate Carbon Metabolism	0	0	1000	0	2	2.7.1.30
GNK	gluconokinase	atp[c] + glcn[c] -> 6pgc[c] + adp[c] + h[c]	SCO1679	SCO1679		Alternate Carbon Metabolism	0	0	1000	0	2	2.7.1.12
HADPCOADH3	3-hydroxyadipyl-CoA dehydrogenase (NAD+)	3hadpcoa[c] + nad[c] <=> h[c] + nadh[c] + oxadpcoa[c]	(SCO1591 or SCO3834 or SCO5385)	SCO1591 SCO3834 SCO5385		Alternate Carbon Metabolism	1	-1000	1000	0	2			$Escherichia coli and Pseudomonas putida#Teufel R, Mascaraque V, Ismail W, Voss M, Perera J, Eisenreich W, Haehnel W, Fuchs G.#2010#Bacterial phenylalanine and phenylacetate catabolic pathway revealed.#Proc Natl Acad Sci U S A.#107#107-132#
HEX4	hexokinase (D-mannose:ATP)	atp[c] + man[c] -> adp[c] + h[c] + man6p[c]				Alternate Carbon Metabolism	0	0	1000	0	1	2.7.1.7	Required for growth using D-mannose as a carbon source
HEX7	hexokinase (D-fructose:ATP)	atp[c] + fru[c] -> adp[c] + f6p[c] + h[c]	SCO1957	SCO1957		Alternate Carbon Metabolism	0	0	1000	0	2	2.7.1.4
HPYRI	hydroxypyruvate isomerase	hpyr[c] <=> 2h3oppan[c]	SCO6206	SCO6206		Alternate Carbon Metabolism	1	-1000	1000	0	2	5.3.1.22
IDOND	L-idonate 5-dehydrogenase	5dglcn[c] + h[c] + nadh[c] <=> idon-L[c] + nad[c]	SCO1682	SCO1682		Alternate Carbon Metabolism	1	-1000	1000	0	2
IDOND2	L-idonate 5-dehydrogenase (NADP)	5dglcn[c] + h[c] + nadph[c] -> idon-L[c] + nadp[c]	SCO1682	SCO1682		Alternate Carbon Metabolism	0	0	1000	0	2
LACZ	b-galactosidase	h2o[c] + lcts[c] -> gal[c] + glc-D[c]	(SCO0766 or SCO3479 or SCO5689 or SCO6347 or SCO6457 or SCO7407)	SCO0766 SCO3479 SCO5689 SCO6347 SCO6457 SCO7407		Alternate Carbon Metabolism	0	0	1000	0	2	3.2.1.23
LCADi	lactaldehyde dehydrogenase	h2o[c] + lald-L[c] + nad[c] -> 2 h[c] + lac-L[c] + nadh[c]	SCO3486	SCO3486		Alternate Carbon Metabolism	0	0	1000	0	2	1.2.1.21
LYXI	Lyxose isomerase	lyx-L[c] -> xylu-L[c]	SCO0812	SCO0812		Alternate Carbon Metabolism	0	0	1000	0	2
MALT	alpha-glucosidase	malt[c] + h2o[c] -> 2 glc-D[c]	(SCO1394 or SCO2228 or SCO3780 or SCO7010)	SCO1394 SCO2228 SCO3780 SCO7010	aglA	Alternate Carbon Metabolism	0	0	1000	0	2	3.2.1.20
MALTATr	maltose O-acetyltransferase	accoa[c] + malt[c] <=> acmalt[c] + coa[c]	SCO7519	SCO7519		Alternate Carbon Metabolism	1	-1000	1000	0	2	2.3.1.79
MAN6PI	mannose-6-phosphate isomerase	man6p[c] <=> f6p[c]	SCO3025	SCO3025	manA	Alternate Carbon Metabolism	1	-1000	1000	0	4	5.3.1.8		Rajesh T, Song E, Kim JN, Lee BR, Kim EJ, Park SH, Kim YG, Yoo D, Park HY, Choi YH, Kim BG, Yang YH.#2012#Inactivation of phosphomannose isomerase gene abolishes sporulation and antibiotic production in Streptomyces coelicolor.#Appl Microbiol Biotechnol.#93#1685-1693#
MELTGH	melibiitol galactohydrolase	melt[c] + h2o[c] -> gal[c] + sbt-D[c]	(SCO0274 or SCO0541)	SCO0274 SCO0541		Alternate Carbon Metabolism	0	0	1000	0	2	3.2.1.22
MLTG1	Maltodextrin glucosidase (maltotriose)	h2o[c] + malttr[c] -> glc-D[c] + malt[c]	(SCO1394 or SCO2228 or SCO3780 or SCO7010)	SCO1394 SCO2228 SCO3780 SCO7010	aglA	Alternate Carbon Metabolism	0	0	1000	0	2
MLTG1e	Maltodextrin glucosidase (maltotriose)	h2o[e] + malttr[e] -> glc-D[e] + malt[e]	(SCO7019 or SCO7020)	SCO7019 SCO7020	aml amlB	Alternate Carbon Metabolism	0	0	1000	0	2
MLTG2	Maltodextrin glucosidase (maltotetraose)	h2o[c] + maltttr[c] -> glc-D[c] + malttr[c]	(SCO1394 or SCO2228 or SCO3780 or SCO7010)	SCO1394 SCO2228 SCO3780 SCO7010	aglA	Alternate Carbon Metabolism	0	0	1000	0	2
MLTG2e	Maltodextrin glucosidase (maltotetraose)	h2o[e] + maltttr[e] -> glc-D[e] + malttr[e]	(SCO7019 or SCO7020)	SCO7019 SCO7020	aml amlB	Alternate Carbon Metabolism	0	0	1000	0	2
MLTG3	Maltodextrin glucosidase (maltopentaose)	h2o[c] + maltpt[c] -> glc-D[c] + maltttr[c]	(SCO1394 or SCO2228 or SCO3780 or SCO7010)	SCO1394 SCO2228 SCO3780 SCO7010	aglA	Alternate Carbon Metabolism	0	0	1000	0	2
MLTG3e	Maltodextrin glucosidase (maltopentaose)	h2o[e] + maltpt[e] -> glc-D[e] + maltttr[e]	(SCO7019 or SCO7020)	SCO7019 SCO7020	aml amlB	Alternate Carbon Metabolism	0	0	1000	0	2
MLTG4	Maltodextrin glucosidase (maltohexaose)	h2o[c] + malthx[c] -> glc-D[c] + maltpt[c]	(SCO1394 or SCO2228 or SCO3780 or SCO7010)	SCO1394 SCO2228 SCO3780 SCO7010	aglA	Alternate Carbon Metabolism	0	0	1000	0	2
MLTG4e	Maltodextrin glucosidase (maltohexaose)	h2o[e] + malthx[e] -> glc-D[e] + maltpt[e]	(SCO7019 or SCO7020)	SCO7019 SCO7020	aml amlB	Alternate Carbon Metabolism	0	0	1000	0	2
MLTG5	Maltodextrin glucosidase (maltoheptaose)	h2o[c] + malthp[c] -> glc-D[c] + malthx[c]	(SCO1394 or SCO2228 or SCO3780 or SCO7010)	SCO1394 SCO2228 SCO3780 SCO7010	aglA	Alternate Carbon Metabolism	0	0	1000	0	2
MLTG5e	Maltodextrin glucosidase (maltoheptaose)	h2o[e] + malthp[e] -> glc-D[e] + malthx[e]	(SCO7019 or SCO7020)	SCO7019 SCO7020	aml amlB	Alternate Carbon Metabolism	0	0	1000	0	2
MLTP1	Maltodextrin phosphorylase (maltopentaose)	maltpt[c] + pi[c] <=> g1p[c] + maltttr[c]	SCO5444	SCO5444	glgP	Alternate Carbon Metabolism	1	-1000	1000	0	2
MLTP2	Maltodextrin phosphorylase (maltohexaose)	malthx[c] + pi[c] <=> g1p[c] + maltpt[c]	SCO5444	SCO5444	glgP	Alternate Carbon Metabolism	1	-1000	1000	0	2
MLTP3	Maltodextrin phosphorylase (maltoheptaose)	malthp[c] + pi[c] <=> g1p[c] + malthx[c]	SCO5444	SCO5444	glgP	Alternate Carbon Metabolism	1	-1000	1000	0	2
MNLD	mannitol 2-dehydrogenase	mnl[c] + nad[c] -> fru[c] + nadh[c] + h[c]				Alternate Carbon Metabolism	0	0	1000	0	1		Required for growth using D-mannitol as a carbon source
MTI	maltose trehalose isomerase	tre[c] <=> malt[c]	(SCO5442 or SCO7334)	SCO5442 SCO7334	treSI treSII	Alternate Carbon Metabolism	1	-1000	1000	0	2	5.4.99.6
OXCDC	Oxalyl-CoA decarboxylase	h[c] + oxalcoa[c] -> co2[c] + forcoa[c]	SCO6584	SCO6584		Alternate Carbon Metabolism	0	0	1000	0	2	4.1.1.8
OXDHCOAT	3-oxo-5,6-dehydrosuberyl-CoA thiolase	3oxdhscoa[c] + coa[c] -> 23dhacoa[c] + accoa[c]	(SCO5144 and (SCO6701 or SCO6967 or SCO3079 or SCO6731))	SCO5144 SCO6701 SCO6967 SCO3079 SCO6731	paaG pcaF	Alternate Carbon Metabolism	0	0	1000	0	2			$Escherichia coli and Pseudomonas putida#Teufel R, Mascaraque V, Ismail W, Voss M, Perera J, Eisenreich W, Haehnel W, Fuchs G.#2010#Bacterial phenylalanine and phenylacetate catabolic pathway revealed.#Proc Natl Acad Sci U S A.#107#107-132#
PACCOAE	ring 1,2-phenylacetyl-CoA epoxidase (NADPH)	h[c] + nadph[c] + o2[c] + phaccoa[c] -> h2o[c] + nadp[c] + rephaccoa[c]	(SCO7471 and SCO7472 and SCO7473 and SCO7474 and SCO7475)	SCO7471 SCO7472 SCO7473 SCO7474 SCO7475	paaA paaB paaC paaD paaE	Alternate Carbon Metabolism	0	0	1000	0	2			$Escherichia coli and Pseudomonas putida#Teufel R, Mascaraque V, Ismail W, Voss M, Perera J, Eisenreich W, Haehnel W, Fuchs G.#2010#Bacterial phenylalanine and phenylacetate catabolic pathway revealed.#Proc Natl Acad Sci U S A.#107#107-132#
PACCOAL	phenylacetate-CoA ligase	atp[c] + coa[c] + pac[c] -> amp[c] + phaccoa[c] + ppi[c]	SCO7469	SCO7469	paaK	Alternate Carbon Metabolism	0	0	1000	0	2	6.2.1.30		$Escherichia coli and Pseudomonas putida#Teufel R, Mascaraque V, Ismail W, Voss M, Perera J, Eisenreich W, Haehnel W, Fuchs G.#2010#Bacterial phenylalanine and phenylacetate catabolic pathway revealed.#Proc Natl Acad Sci U S A.#107#107-132#
PACCOATE	phenylacetyl-CoA thioesterase	phaccoa[c] + h2o[c] -> coa[c] + pac[c] + h[c]	SCO7470	SCO7470	paaI	Alternate Carbon Metabolism	0	0	1000	0	2
PFK_2	Phosphofructokinase	atp[c] + tag6p-D[c] -> adp[c] + h[c] + tagdp-D[c]	(SCO5426 or SCO2119 or SCO1214)	SCO5426 SCO2119 SCO1214	pfkA2 pfkA pfkA3	Alternate Carbon Metabolism	0	0	1000	0	2	2.7.1.11
PGMT	phosphoglucomutase	g1p[c] <=> g6p[c]	SCO7443	SCO7443	pgm	Alternate Carbon Metabolism	1	-1000	1000	0	3	5.4.2.2		Ryu YG, Butler MJ, Chater KF, Lee KJ.#2006#Engineering of primary carbohydrate metabolism for increased production of actinorhodin in Streptomyces coelicolor#Appl. Environ. Microbiol.#72#7132-7139#
PMANM	phosphomannomutase	man1p[c] <=> man6p[c]	(SCO3028 or SCO4916 or SCO1388)	SCO3028 SCO4916 SCO1388	manB	Alternate Carbon Metabolism	1	-1000	1000	0	4	5.4.2.8		Yang YH, Song E, Park SH, Kim JN, Lee K, Kim E, Kim YG, Kim BG.#2010#Loss of phosphomannomutase activity enhances actinorhodin production in Streptomyces coelicolor.#Appl Microbiol Biotechnol.#86#1485-1492#
PPAKr	Propionate kinase	adp[c] + ppap[c] <=> atp[c] + ppa[c]	SCO5424	SCO5424	ackA	Alternate Carbon Metabolism	1	-1000	1000	0	3	2.7.2.1		Hutchings MI, Hong HJ, Buttner MJ.#2006#The vancomycin resistance VanRS two-component signal transduction system of Streptomyces coelicolor.#Mol Microbiol.#59#923-935#
PPM	phosphopentomutase	r1p[c] <=> r5p[c]	SCO7443	SCO7443	pgm	Alternate Carbon Metabolism	1	-1000	1000	0	2	5.4.2.7
PPM2	phosphopentomutase 2 (deoxyribose)	2dr1p[c] <=> 2dr5p[c]	SCO7443	SCO7443	pgm	Alternate Carbon Metabolism	1	-1000	1000	0	2	5.4.2.7
PTA2	Phosphate acetyltransferase	pi[c] + ppcoa[c] -> coa[c] + ppap[c]	SCO5425	SCO5425	pta	Alternate Carbon Metabolism	0	0	1000	0	3			Hutchings MI, Hong HJ, Buttner MJ.#2006#The vancomycin resistance VanRS two-component signal transduction system of Streptomyces coelicolor.#Mol Microbiol.#59#923-935#
RAFGH	raffinose galactohydrolase	raffin[c] + h2o[c] -> gal[c] + sucr[c]	(SCO0274 or SCO0541)	SCO0274 SCO0541		Alternate Carbon Metabolism	0	0	1000	0	2	3.2.1.22
RBK	ribokinase	atp[c] + rib-D[c] -> adp[c] + h[c] + r5p[c]	SCO2748	SCO2748		Alternate Carbon Metabolism	0	0	1000	0	2	2.7.1.15
RBK_L1	L-ribulokinase (L-ribulose)	atp[c] + rbl-L[c] -> adp[c] + h[c] + ru5p-L[c]				Alternate Carbon Metabolism	0	0	1000	0	1	2.7.1.16	Required for growth using L-arabinose as a carbon source
RBP4E	L-ribulose-phosphate 4-epimerase	ru5p-L[c] <=> xu5p-D[c]				Alternate Carbon Metabolism	1	-1000	1000	0	1	5.1.3.4	Required for growth using L-arabinose as a carbon source
REPHACCOAI	ring 1,2-epoxyphenylacetyl-CoA isomerase (oxepin-CoA forming)	rephaccoa[c] <=> 2oxpaccoa[c]	SCO5144	SCO5144	paaG	Alternate Carbon Metabolism	1	-1000	1000	0	2			$Escherichia coli and Pseudomonas putida#Teufel R, Mascaraque V, Ismail W, Voss M, Perera J, Eisenreich W, Haehnel W, Fuchs G.#2010#Bacterial phenylalanine and phenylacetate catabolic pathway revealed.#Proc Natl Acad Sci U S A.#107#107-132#
RMI	L-rhamnose isomerase	rmn[c] <=> rml[c]				Alternate Carbon Metabolism	1	-1000	1000	0	1	5.3.1.14	Required for growth using L-rhamnose as a carbon source
RMK	rhamnulokinase	atp[c] + rml[c] -> adp[c] + h[c] + rml1p[c]	SCO0814	SCO0814		Alternate Carbon Metabolism	0	0	1000	0	2	2.7.1.5
RMPA	Rhamnulose-1-phosphate aldolase	rml1p[c] <=> dhap[c] + lald-L[c]				Alternate Carbon Metabolism	1	-1000	1000	0	1	4.1.2.19	Required for growth using L-rhamnose as a carbon source
SBTO	D-sorbitol oxidase	o2[c] + sbt-D[c] -> fru[c] + h2o2[c]	SCO6147	SCO6147	aldO	Alternate Carbon Metabolism	0	0	1000	0	4			Heuts DP, van Hellemond EW, Janssen DB, Fraaije MW.#2007#Discovery, characterization, and kinetic analysis of an alditol oxidase from Streptomyces coelicolor.#J Biol Chem.#282#20283-20291#
SUCR	sucrose hydrolyzing enzyme	sucr[c] + h2o[c] -> fru[c] + glc-D[c]	(SCO1394 or SCO2228 or SCO3780 or SCO7010)	SCO1394 SCO2228 SCO3780 SCO7010	aglA	Alternate Carbon Metabolism	0	0	1000	0	2	3.2.1.26
TAUDO	Taurine dioxygenase	akg[c] + o2[c] + taur[c] -> aacald[c] + co2[c] + h[c] + so3[c] + succ[c]	(SCO7507 or SCO7357)	SCO7507 SCO7357		Alternate Carbon Metabolism	0	0	1000	0	2	1.14.11.17
TGBPA	Tagatose-bisphosphate aldolase	tagdp-D[c] <=> dhap[c] + g3p[c]	(SCO5848 and SCO5852)	SCO5848 SCO5852	agaZ agaY	Alternate Carbon Metabolism	1	-1000	1000	0	2	4.1.2.40		Brinkkötter A, Shakeri-Garakani A, Lengeler JW.#2002#Two class II D-tagatose-bisphosphate aldolases from enteric bacteria.#Arch Microbiol.#177#410-419#
TRE6PP	trehalose-phosphatase	h2o[c] + tre6p[c] -> pi[c] + tre[c]	SCO4288	SCO4288	otsB	Alternate Carbon Metabolism	0	0	1000	0	2	3.1.3.12
TRE6PS	alpha,alpha-trehalose-phosphate synthase (UDP-forming)	g6p[c] + udpg[c] -> h[c] + tre6p[c] + udp[c]	SCO4290	SCO4290	otsA	Alternate Carbon Metabolism	0	0	1000	0	2	2.4.1.15
TRSARr	tartronate semialdehyde reductase	2h3oppan[c] + h[c] + nadh[c] <=> glyc-R[c] + nad[c]	SCO6205	SCO6205		Alternate Carbon Metabolism	1	-1000	1000	0	2	1.1.1.60
UDPG4E	UDPglucose 4-epimerase	udpg[c] <=> udpgal[c]	(SCO2988 or SCO3137 or SCO3326 or SCO3739)	SCO2988 SCO3137 SCO3326 SCO3739	galE2 galE1	Alternate Carbon Metabolism	1	-1000	1000	0	2	5.1.3.2
UGLT	UDPglucose--hexose-1-phosphate uridylyltransferase	gal1p[c] + udpg[c] <=> g1p[c] + udpgal[c]	SCO3138	SCO3138	galT	Alternate Carbon Metabolism	1	-1000	1000	0	2	2.7.7.12
URIH	Uridine hydrolase	h2o[c] + uri[c] -> rib-D[c] + ura[c]	SCO3779	SCO3779		Alternate Carbon Metabolism	0	0	1000	0	2	3.2.2.8
X5PL3E	L-xylulose 5-phosphate 3-epimerase	xu5p-L[c] -> ru5p-L[c]				Alternate Carbon Metabolism	0	0	1000	0	1		Required for growth using L-lyxose as a carbon source	$Streptomyces lividans#Madduri K, Stuttard C, Vining LC.#1989#Lysine catabolism in Streptomyces spp. is primarily through cadaverine: beta-lactam producers also make alpha-aminoadipate.#J Bacteriol.#171#299-302#
XYLI1	xylose isomerase	xyl-D[c] <=> xylu-D[c]	SCO1169	SCO1169	xylA	Alternate Carbon Metabolism	1	-1000	1000	0	3	5.3.1.5		Voronovsky AY, Ryabova OB, Verba OV, Ishchuk OP, Dmytruk KV, Sibirny AA.#2005#Expression of xylA genes encoding xylose isomerases from Escherichia coli and Streptomyces coelicolor in the methylotrophic yeast Hansenula polymorpha.#FEMS Yeast Res.#5#1055-1062#
XYLI2	xylose isomerase	glc-D[c] <=> fru[c]	SCO1169	SCO1169	xylA	Alternate Carbon Metabolism	1	-1000	1000	0	2	5.3.1.5
XYLK	xylulokinase	atp[c] + xylu-D[c] -> adp[c] + h[c] + xu5p-D[c]	(SCO1170 or SCO2462)	SCO1170 SCO2462	xylB	Alternate Carbon Metabolism	0	0	1000	0	2	2.7.1.17
XYLK2	L-xylulokinase	atp[c] + xylu-L[c] -> adp[c] + h[c] + xu5p-L[c]				Alternate Carbon Metabolism	0	0	1000	0	1	2.7.1.53	Required for growth using L-lyxose as a carbon source	$Streptomyces lividans#Madduri K, Stuttard C, Vining LC.#1989#Lysine catabolism in Streptomyces spp. is primarily through cadaverine: beta-lactam producers also make alpha-aminoadipate.#J Bacteriol.#171#299-302#
XYLTO	xylitol oxidase	o2[c] + xylt[c] -> xylu-D[c] + h2o2[c]	SCO6147	SCO6147	aldO	Alternate Carbon Metabolism	0	0	1000	0	4	1.1.3.41		Heuts DP, van Hellemond EW, Janssen DB, Fraaije MW.#2007#Discovery, characterization, and kinetic analysis of an alditol oxidase from Streptomyces coelicolor.#J Biol Chem.#282#20283-20291#
ICL	Isocitrate lyase	icit[c] -> glx[c] + succ[c]	SCO0982	SCO0982	aceA	Anaplerotic Reactions	0	0	1000	0	2	4.1.3.1
MALS	malate synthase	accoa[c] + glx[c] + h2o[c] -> coa[c] + h[c] + mal-L[c]	(SCO0983 or SCO6243)	SCO0983 SCO6243	aceB2 aceB1	Anaplerotic Reactions	0	0	1000	0	4	4.1.3.2		Loke P, Goh LL, Seng Soh B, Yeow P, Sim TS.#2002#Purification and characterization of recombinant malate synthase enzymes from Streptomyces coelicolor A3(2) and S. clavuligerus NRRL3585.#J Ind Microbiol Biotechnol.#28#239-243#
ME1	malic enzyme (NAD)	mal-L[c] + nad[c] -> co2[c] + nadh[c] + pyr[c]	SCO2951	SCO2951		Anaplerotic Reactions	0	0	1000	0	4	1.1.1.38		Rodriguez E, Navone L, Casati P, Gramajo H.#2012#Impact of malic enzymes on antibiotic and triacylglycerol production in Streptomyces coelicolor#Appl. Environ. Microbiol.#78#4571-4579#
ME2	malic enzyme (NADP)	mal-L[c] + nadp[c] -> co2[c] + nadph[c] + pyr[c]	SCO5261	SCO5261		Anaplerotic Reactions	0	0	1000	0	4	1.1.1.40		Rodriguez E, Navone L, Casati P, Gramajo H.#2012#Impact of malic enzymes on antibiotic and triacylglycerol production in Streptomyces coelicolor#Appl. Environ. Microbiol.#78#4571-4579#
PEPCK	phosphoenolpyruvate carboxykinase (GTP)	gtp[c] + oaa[c] -> gdp[c] + co2[c] + pep[c]	SCO4979	SCO4979		Anaplerotic Reactions	0	0	1000	0	2	4.1.1.32		$Corynebacterium glutamicum#Petersen S, Mack C, de Graaf AA, Riedel C, Eikmanns BJ, Sahm H.#2001#Metabolic consequences of altered phosphoenolpyruvate carboxykinase activity in Corynebacterium glutamicum reveal anaplerotic regulation mechanisms in vivo.#Metab Eng.#3#344-361##$Bacillus subtilis#Zamboni N, Maaheimo H, Szyperski T, Hohmann HP, Sauer U.#2004#The phosphoenolpyruvate carboxykinase also…
PPA	inorganic diphosphatase	h2o[c] + ppi[c] -> h[c] + 2 pi[c]	SCO3409	SCO3409	ppa	Anaplerotic Reactions	0	0	1000	0	2	3.6.1.1
PPA_1	inorganic diphosphatase (one proton translocation)	h2o[c] + ppi[c] -> h[e] + 2 pi[c]	SCO3547	SCO3547	hppA	Anaplerotic Reactions	0	0	1000	0	2	3.6.1.1
PPC	phosphoenolpyruvate carboxylase	co2[c] + h2o[c] + pep[c] -> h[c] + oaa[c] + pi[c]	SCO3127	SCO3127	ppc	Anaplerotic Reactions	0	0	1000	0	4	4.1.1.31		Bramwell,H., H.G.Nimmo, I.S.Hunter, and J.R.Coggins.#1993#Phosphoenolpyruvate carboxylase from Streptomyces coelicolor A3(2): purification of the enzyme, cloning of the ppc gene and over-expression of the protein in a streptomycete.#Biochem. J.#293#131-136#
4HGLSD	L-4-hydroxyglutamate semialdehyde dehydrogenase	4hglusa[c] + h2o[c] + nad[c] -> e4hglu[c] + 2 h[c] + nadh[c]	SCO5520	SCO5520		Arginine and Proline Metabolism	0	0	1000	0	4	1.5.1.12		Smith DD, Wood NJ, Hodgson DA.#1995#Interaction between primary and secondary metabolism in Streptomyces coelicolor A3(2): role of pyrroline-5-carboxylate dehydrogenase.#Microbiology.#141#1739-1744#
ABTA	4-aminobutyrate transaminase	4abut[c] + akg[c] -> glu-L[c] + sucsal[c]	(SCO5676 or SCO7034)	SCO5676 SCO7034	gabT	Arginine and Proline Metabolism	0	0	1000	0	2	2.6.1.19
ABUTD	Aminobutyraldehyde dehydrogenase	4abutn[c] + h2o[c] + nad[c] -> 4abut[c] + 2 h[c] + nadh[c]	(SCO5657 or SCO5666)	SCO5657 SCO5666		Arginine and Proline Metabolism	0	0	1000	0	2	1.2.1.19
ACGK	acetylglutamate kinase	acglu[c] + atp[c] -> acg5p[c] + adp[c]	SCO1578	SCO1578	argB	Arginine and Proline Metabolism	0	0	1000	0	2	2.7.2.8
ACGS	N-acetylglutamate synthase	accoa[c] + glu-L[c] -> acglu[c] + coa[c] + h[c]	(SCO1579 or SCO3376)	SCO1579 SCO3376	argJ argA	Arginine and Proline Metabolism	0	0	1000	0	2	2.3.1.1
ACOTA	acetylornithine transaminase	acorn[c] + akg[c] <=> acg5sa[c] + glu-L[c]	SCO1577	SCO1577	argD	Arginine and Proline Metabolism	1	-1000	1000	0	2	2.6.1.11
ADMDC	adenosylmethionine decarboxylase	amet[c] + h[c] -> ametam[c] + co2[c]				Arginine and Proline Metabolism	0	0	1000	0	1	4.1.1.50	Required for growth using L-alanine as a carbon source
AGMD	agmatine deiminase	agm[c] + h2o[c] -> cptrc[c] + nh4[c]	SCO5527	SCO5527		Arginine and Proline Metabolism	0	0	1000	0	2	3.5.3.12
AGMT	agmatinase	agm[c] + h2o[c] -> ptrc[c] + urea[c]	SCO2770	SCO2770	speB	Arginine and Proline Metabolism	0	0	1000	0	2	3.5.3.11
AGPR	N-acetyl-g-glutamyl-phosphate reductase	acg5sa[c] + nadp[c] + pi[c] <=> acg5p[c] + h[c] + nadph[c]	SCO1580	SCO1580	argC	Arginine and Proline Metabolism	1	-1000	1000	0	2	1.2.1.38
AMPTASEPG	aminopeptidase (pro-gly)	h2o[c] + progly[c] -> gly[c] + pro-L[c]	(SCO2018 or SCO2635 or SCO2643)	SCO2018 SCO2635 SCO2643	pepN	Arginine and Proline Metabolism	0	0	1000	0	2	3.4.11.2
APCS	aminopropylcadaverine synthase	15dap[c] + ametam[c] -> 5mta[c] + h[c] + na15dap[c]	(SCO3655 or SCO2455)	SCO3655 SCO2455		Arginine and Proline Metabolism	0	0	1000	0	2	2.5.1.16
ARGD	Arginine Deiminase	arg-L[c] + h2o[c] -> citr-L[c] + nh4[c]	(SCO0613 or SCO5975)	SCO0613 SCO5975	arc arcA2	Arginine and Proline Metabolism	0	0	1000	0	2	3.5.3.6
ARGSL	argininosuccinate lyase	argsuc[c] <=> arg-L[c] + fum[c]	SCO1570	SCO1570	argH	Arginine and Proline Metabolism	1	-1000	1000	0	2	4.3.2.1
ARGSS	argininosuccinate synthase	asp-L[c] + atp[c] + citr-L[c] -> amp[c] + argsuc[c] + h[c] + ppi[c]	SCO7036	SCO7036	argG	Arginine and Proline Metabolism	0	0	1000	0	2	6.3.4.5
CBPS	carbamoyl-phosphate synthase (glutamine-hydrolysing)	2 atp[c] + gln-L[c] + h2o[c] + hco3[c] -> 2 adp[c] + cbp[c] + glu-L[c] + 2 h[c] + pi[c]	(SCO1483 and SCO1484)	SCO1483 SCO1484	pyrA pyrAA	Arginine and Proline Metabolism	0	0	1000	0	2	6.3.5.5
CPTRCA	N-carbamoylputrescine amidase	cptrc[c] + h2o[c] + 2 h[c] -> ptrc[c] + co2[c] + nh4[c]	SCO6414	SCO6414		Arginine and Proline Metabolism	0	0	1000	0	2	3.5.1.53
DDPGA	2-dehydro-3-deoxy-phosphogluconate aldolase	4h2oglt[c] <=> glx[c] + pyr[c]	(SCO0852 or SCO2298 or SCO3473 or SCO3495)	SCO0852 SCO2298 SCO3473 SCO3495	kdgA	Arginine and Proline Metabolism	1	-1000	1000	0	2	4.1.2.16
EHGLAT	L-erythro-4-Hydroxyglutamate:2-oxoglutarate aminotransferase	akg[c] + e4hglu[c] -> 4h2oglt[c] + glu-L[c]	(SCO4645 or SCO3658)	SCO4645 SCO3658	aspC	Arginine and Proline Metabolism	0	0	1000	0	2	2.6.1.1
G5SADs	L-glutamate 5-semialdehyde dehydratase (spontaneous)	glu5sa[c] -> 1pyr5c[c] + h[c] + h2o[c]	s0001	s0001	SPONTANEOUS	Arginine and Proline Metabolism	0	0	1000	0	1		Spontaneous reaction
G5SD	glutamate-5-semialdehyde dehydrogenase	glu5p[c] + h[c] + nadph[c] -> glu5sa[c] + nadp[c] + pi[c]	SCO2585	SCO2585	proA	Arginine and Proline Metabolism	0	0	1000	0	2	1.2.1.41
GLU5K	glutamate 5-kinase	atp[c] + glu-L[c] -> adp[c] + glu5p[c]	SCO2587	SCO2587	proB	Arginine and Proline Metabolism	0	0	1000	0	2	2.7.2.11
HPROb	L-hydroxyproline reductase (NADP)	1p3h5c[c] + 2 h[c] + nadph[c] -> nadp[c] + 4hpro-LT[c]	SCO3337	SCO3337	proC	Arginine and Proline Metabolism	0	0	1000	0	3	1.5.1.2		Barona-Gómez F, Hodgson DA.#2010#Multicopy proC in Streptomyces coelicolor A3(2) elicits a transient production of prodiginines, while proC deletion does not yield a proline auxotroph.#J Mol Microbiol Biotechnol.#19#152-158#
MTAN	methylthioadenosine nucleosidase	5mta[c] + h2o[c] -> 5mtr[c] + ade[c]	SCO5431	SCO5431		Arginine and Proline Metabolism	0	0	1000	0	2	3.2.2.16
OCBTi	ornithine carbamoyltransferase (irreversible)	cbp[c] + orn[c] -> citr-L[c] + h[c] + pi[c]	SCO5976	SCO5976	arcB	Arginine and Proline Metabolism	0	0	1000	0	2	2.1.3.3
ORNDC	Ornithine Decarboxylase	h[c] + orn[c] -> co2[c] + ptrc[c]	SCO6035	SCO6035		Arginine and Proline Metabolism	0	0	1000	0	2	4.1.1.17
ORNTA	ornithine transaminase	akg[c] + orn[c] -> glu-L[c] + glu5sa[c]	SCO1223	SCO1223	rocD	Arginine and Proline Metabolism	0	0	1000	0	2	2.6.1.13
ORNTAC	ornithine transacetylase	acorn[c] + glu-L[c] <=> acglu[c] + orn[c]	SCO1579	SCO1579	argJ	Arginine and Proline Metabolism	1	-1000	1000	0	2	2.3.1.35		Hindle Z, Callis R, Dowden S, Rudd BA, Baumberg S.#1994#Cloning and expression in Escherichia coli of a Streptomyces coelicolor A3(2) argCJB gene cluster.#Microbiology.#140#311-320#
P5CD	1-pyrroline-5-carboxylate dehydrogenase	1pyr5c[c] + 2 h2o[c] + nad[c] -> glu-L[c] + h[c] + nadh[c]	SCO5520	SCO5520		Arginine and Proline Metabolism	0	0	1000	0	4	1.5.1.12		Smith DD, Wood NJ, Hodgson DA.#1995#Interaction between primary and secondary metabolism in Streptomyces coelicolor A3(2): role of pyrroline-5-carboxylate dehydrogenase.#Microbiology.#141#1739-1744#
P5CR	pyrroline-5-carboxylate reductase	1pyr5c[c] + 2 h[c] + nadph[c] -> nadp[c] + pro-L[c]	SCO3337	SCO3337	proC	Arginine and Proline Metabolism	0	0	1000	0	3	1.5.1.2		Barona-Gómez F, Hodgson DA.#2010#Multicopy proC in Streptomyces coelicolor A3(2) elicits a transient production of prodiginines, while proC deletion does not yield a proline auxotroph.#J Mol Microbiol Biotechnol.#19#152-158#
PHCD	L-1-pyrroline-3-hydroxy-5-carboxylate dehydrogenase	1p3h5c[c] + 2 h2o[c] + nad[c] -> e4hglu[c] + h[c] + nadh[c]	SCO5520	SCO5520		Arginine and Proline Metabolism	0	0	1000	0	4	1.5.1.12		Smith DD, Wood NJ, Hodgson DA.#1995#Interaction between primary and secondary metabolism in Streptomyces coelicolor A3(2): role of pyrroline-5-carboxylate dehydrogenase.#Microbiology.#141#1739-1744#
PHCHGS	L-1-Pyrroline-3-hydroxy-5-carboxylate spontaneous conversion to L-4-Hydroxyglutamate semialdehyde	1p3h5c[c] + h[c] + h2o[c] <=> 4hglusa[c]	s0001	s0001	SPONTANEOUS	Arginine and Proline Metabolism	1	-1000	1000	0	1		Spontaneous reaction
PROD2	Proline dehydrogenase	fad[c] + pro-L[c] -> 1pyr5c[c] + fadh2[c] + h[c]				Arginine and Proline Metabolism	0	0	1000	0	1	1.5.99.8	Required for growth using L-proline as a carbon source
PTRCTA	Putrescine Transaminase	akg[c] + ptrc[c] -> 4abutn[c] + glu-L[c]	SCO1284	SCO1284		Arginine and Proline Metabolism	0	0	1000	0	2	2.6.1.29
PUTA3	L-Glutamate 5-semialdehyde:NAD+ oxidoreductase	glu5sa[c] + h2o[c] + nad[c] -> glu-L[c] + 2 h[c] + nadh[c]	SCO5520	SCO5520		Arginine and Proline Metabolism	0	0	1000	0	4	1.5.1.12		Smith DD, Wood NJ, Hodgson DA.#1995#Interaction between primary and secondary metabolism in Streptomyces coelicolor A3(2): role of pyrroline-5-carboxylate dehydrogenase.#Microbiology.#141#1739-1744#
SSALy	succinate-semialdehyde dehydrogenase (NADP)	h2o[c] + nadp[c] + sucsal[c] -> 2 h[c] + nadph[c] + succ[c]	(SCO1204 or SCO4780 or SCO7035)	SCO1204 SCO4780 SCO7035	gabD1 gabD2 gabD	Arginine and Proline Metabolism	0	0	1000	0	2	1.2.1.16
UREA	urease	2 h[c] + h2o[c] + urea[c] -> co2[c] + 2 nh4[c]	((SCO1234 and SCO1235 and SCO1236) or (SCO5525 and SCO5526))	SCO1234 SCO1235 SCO1236 SCO5525 SCO5526	ureC ureB ureA ureAB	Arginine and Proline Metabolism	0	0	1000	0	2	3.5.1.5
3OADPCOAT	3-oxoadipate CoA-transferase	3oxoadp[c] + succoa[c] -> oxadpcoa[c] + succ[c]	(SCO6702 and SCO6703)	SCO6702 SCO6703	pcaJ pcaI	Benzoate Metabolism	0	0	1000	0	2	2.8.3.6
4CMLCL	4-carboxymuconolactone decarboxylase	4cml[c] + h[c] -> 5odhf2a[c] + co2[c]	(SCO6339 or SCO6697)	SCO6339 SCO6697	pcaL	Benzoate Metabolism	0	0	1000	0	2	4.1.1.44
MUCCY	3-carboxy-cis,cis-muconate cycloisomerase	CCbuttc[c] + h[c] -> 4cml[c]	SCO6698	SCO6698	pcaB	Benzoate Metabolism	0	0	1000	0	2	5.5.1.2
OXOAEL	3-oxoadipate enol-lactone hydrolase	5odhf2a[c] + h2o[c] -> 3oxoadp[c] + h[c]	(SCO6339 or SCO6697)	SCO6339 SCO6697	pcaL	Benzoate Metabolism	0	0	1000	0	2	3.1.1.24
PCADYOX	protocatechuate 3,4-dioxygenase	34dhbz[c] + o2[c] -> CCbuttc[c] + 2 h[c]	(SCO6699 and SCO6700)	SCO6699 SCO6700	pcaG pcaH	Benzoate Metabolism	0	0	1000	0	2	1.13.11.3
VNTDM	vanillate:oxygen oxidoreductase (demethylating)	h[c] + nadh[c] + o2[c] + vanlt[c] -> 34dhbz[c] + fald[c] + h2o[c] + nad[c]	SCO6680	SCO6680		Benzoate Metabolism	0	0	1000	0	2	1.14.13.82
AACOATi	Acetoacetyl-CoA:acetate CoA-transferase	acac[c] + atp[c] + coa[c] -> aacoa[c] + amp[c] + ppi[c]	SCO1393	SCO1393	acsA	Butanoate Metabolism	0	0	1000	0	2	6.2.1.16
BDH	(R)-3-Hydroxybutanoate:NAD+ oxidoreductase	bhb[c] + nad[c] <=> acac[c] + h[c] + nadh[c]	SCO1012	SCO1012		Butanoate Metabolism	1	-1000	1000	0	2	1.1.1.30
IBMi	isobutyryl-CoA mutase (irreversible)	ibcoa[c] -> btcoa[c]	(SCO5415 and (SCO4800 or SCO6833))	SCO5415 SCO4800 SCO6833	icmA icmB	Butanoate Metabolism	0	0	1000	0	2	5.4.99.13	Assumed to be irreversible to get realistic flux distribution	$Streptomyces cinnamonensis#Ratnatilleke A, Vrijbloed JW, Robinson JA.#1999#Cloning and sequencing of the coenzyme B(12)-binding domain of isobutyryl-CoA mutase from Streptomyces cinnamonensis, reconstitution of mutase activity, and characterization of the recombinant enzyme produced in Escherichia coli.#J Biol Chem.#274#31679-31685#
CDAS1	Malonyl-CoA-ACP transacylase (calcium-dependent antibiotics ACP)	ACPcda[c] + malcoa[c] <=> coa[c] + malACPcda[c]	(SCO2387 and SCO3249)	SCO2387 SCO3249	fabD	Calcium-Dependent Antibiotics Biosynthesis	1	-1000	1000	0	2	2.3.1.39
CDAS10	fatty-acyl-ACP hydrolase	h2o[c] + hexACPcda[c] -> ACPcda[c] + h[c] + hxa[c]				Calcium-Dependent Antibiotics Biosynthesis	0	0	1000	0	1	3.1.2.14	Required to produce calcium-dependent antibiotics
CDAS11	acyl-CoA dehydrogenase (hexanoyl-CoA)	hxcoa[c] + o2[c] -> hx2coa[c] + h2o2[c]	SCO3247	SCO3247	hxcO	Calcium-Dependent Antibiotics Biosynthesis	0	0	1000	0	2			Hojati Z, Milne C, Harvey B, Gordon L, Borg M, Flett F, Wilkinson B, Sidebottom PJ, Rudd BA, Hayes MA, Smith CP, Micklefield J.#2002#Structure, biosynthetic origin, and engineered biosynthesis of calcium-dependent antibiotics from Streptomyces coelicolor.#Chem Biol.#9#1175-1187#
CDAS12	hexenoyl-CoA monooxygenase	hx2coa[c] + nadph[c] + h[c] + o2[c] -> ephxcoa[c] + nadp[c] + h2o[c]	SCO3245	SCO3245	hcmO	Calcium-Dependent Antibiotics Biosynthesis	0	0	1000	0	2			Hojati Z, Milne C, Harvey B, Gordon L, Borg M, Flett F, Wilkinson B, Sidebottom PJ, Rudd BA, Hayes MA, Smith CP, Micklefield J.#2002#Structure, biosynthetic origin, and engineered biosynthesis of calcium-dependent antibiotics from Streptomyces coelicolor.#Chem Biol.#9#1175-1187#
CDAS13	4-hydroxymandelate synthase	34hpp[c] + o2[c] -> 4hmda[c] + co2[c]	SCO3229	SCO3229	hmaS	Calcium-Dependent Antibiotics Biosynthesis	0	0	1000	0	3	1.13.11.46		Hojati Z, Milne C, Harvey B, Gordon L, Borg M, Flett F, Wilkinson B, Sidebottom PJ, Rudd BA, Hayes MA, Smith CP, Micklefield J.#2002#Structure, biosynthetic origin, and engineered biosynthesis of calcium-dependent antibiotics from Streptomyces coelicolor.#Chem Biol.#9#1175-1187#
CDAS14a	4-hydroxymandelate oxidase	4hmda[c] + o2[c] -> 4hpglx[c] + h2o2[c]	SCO3228	SCO3228	hmo	Calcium-Dependent Antibiotics Biosynthesis	0	0	1000	0	2			Hojati Z, Milne C, Harvey B, Gordon L, Borg M, Flett F, Wilkinson B, Sidebottom PJ, Rudd BA, Hayes MA, Smith CP, Micklefield J.#2002#Structure, biosynthetic origin, and engineered biosynthesis of calcium-dependent antibiotics from Streptomyces coelicolor.#Chem Biol.#9#1175-1187#
CDAS14b	4-hydroxymandelate oxidase	4hmda[c] + mqn9[c] -> 4hpglx[c] + mql9[c]	SCO3228	SCO3228	hmo	Calcium-Dependent Antibiotics Biosynthesis	0	0	1000	0	2			Hojati Z, Milne C, Harvey B, Gordon L, Borg M, Flett F, Wilkinson B, Sidebottom PJ, Rudd BA, Hayes MA, Smith CP, Micklefield J.#2002#Structure, biosynthetic origin, and engineered biosynthesis of calcium-dependent antibiotics from Streptomyces coelicolor.#Chem Biol.#9#1175-1187#
CDAS15	4-hydroxyphenylglycine aminotransferase	4hpglx[c] + glu-L[c] <=> 4hpgly[c] + akg[c]	SCO3227	SCO3227	hpgT	Calcium-Dependent Antibiotics Biosynthesis	1	-1000	1000	0	2			Hojati Z, Milne C, Harvey B, Gordon L, Borg M, Flett F, Wilkinson B, Sidebottom PJ, Rudd BA, Hayes MA, Smith CP, Micklefield J.#2002#Structure, biosynthetic origin, and engineered biosynthesis of calcium-dependent antibiotics from Streptomyces coelicolor.#Chem Biol.#9#1175-1187#
CDAS16	glutamate-3-methyltransferase	glu-L[c] + 5mthf[c] -> meglu[c] + thf[c] + h[c]	SCO3215	SCO3215	glmT	Calcium-Dependent Antibiotics Biosynthesis	0	0	1000	0	2			Hojati Z, Milne C, Harvey B, Gordon L, Borg M, Flett F, Wilkinson B, Sidebottom PJ, Rudd BA, Hayes MA, Smith CP, Micklefield J.#2002#Structure, biosynthetic origin, and engineered biosynthesis of calcium-dependent antibiotics from Streptomyces coelicolor.#Chem Biol.#9#1175-1187#
CDAS17	calcium-dependent antibiotics non-ribosomal peptide synthetase	ephxcoa[c] + ser-L[c] + thr-L[c] + 2 trp-L[c] + 3 asp-L[c] + 4hpgly[c] + gly[c] + asn-L[c] + meglu[c] + 11 atp[c] -> CDAint1[c] + coa[c] + 11 h[c] + 11 amp[c] + 11 ppi[c]	(SCO3230 and SCO3231 and SCO3232)	SCO3230 SCO3231 SCO3232	cdaPS1 cdaPS2 cdaPS3	Calcium-Dependent Antibiotics Biosynthesis	0	0	1000	0	2			Hojati Z, Milne C, Harvey B, Gordon L, Borg M, Flett F, Wilkinson B, Sidebottom PJ, Rudd BA, Hayes MA, Smith CP, Micklefield J.#2002#Structure, biosynthetic origin, and engineered biosynthesis of calcium-dependent antibiotics from Streptomyces coelicolor.#Chem Biol.#9#1175-1187#
CDAS18	asparagine oxygenase (calcium-dependent antibiotics)	CDAint1[c] + o2[c] + akg[c] -> CDAint2[c] + succ[c] + co2[c]	SCO3236	SCO3236	asnO	Calcium-Dependent Antibiotics Biosynthesis	0	0	1000	0	2			Hojati Z, Milne C, Harvey B, Gordon L, Borg M, Flett F, Wilkinson B, Sidebottom PJ, Rudd BA, Hayes MA, Smith CP, Micklefield J.#2002#Structure, biosynthetic origin, and engineered biosynthesis of calcium-dependent antibiotics from Streptomyces coelicolor.#Chem Biol.#9#1175-1187#
CDAS19	3-hydroxyasparagine phosphotransferase (calcium-dependent antibiotics)	CDAint2[c] + atp[c] -> CDA[c] + adp[c] + h[c]	SCO3234	SCO3234	hasP	Calcium-Dependent Antibiotics Biosynthesis	0	0	1000	0	2			Hojati Z, Milne C, Harvey B, Gordon L, Borg M, Flett F, Wilkinson B, Sidebottom PJ, Rudd BA, Hayes MA, Smith CP, Micklefield J.#2002#Structure, biosynthetic origin, and engineered biosynthesis of calcium-dependent antibiotics from Streptomyces coelicolor.#Chem Biol.#9#1175-1187#
CDAS2	beta-ketoacyl-ACP synthase (2) (calcium-dependent antibiotics ACP)	accoa[c] + h[c] + malACPcda[c] -> actACPcda[c] + co2[c] + coa[c]	(SCO3246 and SCO3249)	SCO3246 SCO3249	fabH4	Calcium-Dependent Antibiotics Biosynthesis	0	0	1000	0	2
CDAS3	3-oxoacyl-[acyl-carrier-protein] reductase (n-C4:0)	actACPcda[c] + h[c] + nadph[c] <=> 3haACPcda[c] + nadp[c]	(SCO1815 or SCO1345 or SCO1346 or SCO4501 or SCO1831 or SCO4681 or SCO0330)	SCO1815 SCO1345 SCO1346 SCO4501 SCO1831 SCO4681 SCO0330	fabG fabG2 fabG3	Calcium-Dependent Antibiotics Biosynthesis	1	-1000	1000	0	4	1.1.1.100		Tang Y, Lee HY, Tang Y, Kim CY, Mathews I, Khosla C.#2006#Structural and functional studies on SCO1815: a beta-ketoacyl-acyl carrier protein reductase from Streptomyces coelicolor A3(2).#Biochemistry.#45#14085-14093#
CDAS4	3-hydroxyacyl-[acyl-carrier-protein] dehydratase (n-C4:0)	3haACPcda[c] -> but2eACPcda[c] + h2o[c]				Calcium-Dependent Antibiotics Biosynthesis	0	0	1000	0	1	4.2.1.58	Required to produce calcium-dependent antibiotics
CDAS5x	enoyl-[acyl-carrier-protein] reductase (NADH) (n-C4:0)	but2eACPcda[c] + h[c] + nadh[c] -> butACPcda[c] + nad[c]	SCO1814	SCO1814	inhA	Calcium-Dependent Antibiotics Biosynthesis	0	0	1000	0	2	1.3.1.9
CDAS5y	enoyl-[acyl-carrier-protein] reductase (NADPH) (n-C4:0)	but2eACPcda[c] + h[c] + nadph[c] -> butACPcda[c] + nadp[c]	SCO1814	SCO1814	inhA	Calcium-Dependent Antibiotics Biosynthesis	0	0	1000	0	2	1.3.1.10
CDAS6	3-oxoacyl-[acyl-carrier-protein] synthase (n-C6:0)	butACPcda[c] + h[c] + malACPcda[c] -> 3ohexACPcda[c] + ACPcda[c] + co2[c]	SCO3248	SCO3248	fabF3	Calcium-Dependent Antibiotics Biosynthesis	0	0	1000	0	3	2.3.1.41		Lewis RA, Nunns L, Thirlway J, Carroll K, Smith CP, Micklefield J.#2011#Active site modification of the β-ketoacyl-ACP synthase FabF3 of Streptomyces coelicolor affects the fatty acid chain length of the CDA lipopeptides.#Chem Commun (Camb).#47#1860-1862#
CDAS7	3-oxoacyl-[acyl-carrier-protein] reductase (n-C6:0)	3ohexACPcda[c] + h[c] + nadph[c] <=> 3hhexACPcda[c] + nadp[c]	(SCO1815 or SCO1345 or SCO1346 or SCO4501 or SCO1831 or SCO4681 or SCO0330)	SCO1815 SCO1345 SCO1346 SCO4501 SCO1831 SCO4681 SCO0330	fabG fabG2 fabG3	Calcium-Dependent Antibiotics Biosynthesis	1	-1000	1000	0	4	1.1.1.100		Tang Y, Lee HY, Tang Y, Kim CY, Mathews I, Khosla C.#2006#Structural and functional studies on SCO1815: a beta-ketoacyl-acyl carrier protein reductase from Streptomyces coelicolor A3(2).#Biochemistry.#45#14085-14093#
CDAS8	3-hydroxyacyl-[acyl-carrier-protein] dehydratase (n-C6:0)	3hhexACPcda[c] -> h2o[c] + thex2eACPcda[c]				Calcium-Dependent Antibiotics Biosynthesis	0	0	1000	0	1	4.2.1.58	Required to produce calcium-dependent antibiotics
CDAS9x	enoyl-[acyl-carrier-protein] reductase (NADH) (n-C6:0)	h[c] + nadh[c] + thex2eACPcda[c] -> hexACPcda[c] + nad[c]	SCO1814	SCO1814	inhA	Calcium-Dependent Antibiotics Biosynthesis	0	0	1000	0	2	1.3.1.9
CDAS9y	enoyl-[acyl-carrier-protein] reductase (NADPH) (n-C6:0)	h[c] + nadph[c] + thex2eACPcda[c] -> hexACPcda[c] + nadp[c]	SCO1814	SCO1814	inhA	Calcium-Dependent Antibiotics Biosynthesis	0	0	1000	0	2	1.3.1.10
3HAD100	3-hydroxyacyl-[acyl-carrier-protein] dehydratase (n-C10:0)	3hdecACP[c] -> h2o[c] + tdec2eACP[c]				Cell Envelope Biosynthesis	0	0	1000	0	1	4.2.1.58	Required for growth (fatty acid biosynthesis)
3HAD110	3-hydroxyacyl-[acyl-carrier-protein] dehydratase (n-C11:0)	3hundcaACP[c] -> h2o[c] + tundca2eACP[c]				Cell Envelope Biosynthesis	0	0	1000	0	1	4.2.1.58	Required for growth (fatty acid biosynthesis)
3HAD120	3-hydroxyacyl-[acyl-carrier-protein] dehydratase (n-C12:0)	3hddecACP[c] -> h2o[c] + tddec2eACP[c]				Cell Envelope Biosynthesis	0	0	1000	0	1	4.2.1.58	Required for growth (fatty acid biosynthesis)
3HAD121	3-hydroxyacyl-[acyl-carrier-protein] dehydratase (n-C12:1)	3hcddec5eACP[c] -> h2o[c] + t3c5ddeceACP[c]				Cell Envelope Biosynthesis	0	0	1000	0	1	4.2.1.58	Required for growth (fatty acid biosynthesis)
3HAD130	3-hydroxyacyl-[acyl-carrier-protein] dehydratase (n-C13:0)	3htridcaACP[c] -> h2o[c] + ttridca2eACP[c]				Cell Envelope Biosynthesis	0	0	1000	0	1	4.2.1.58	Required for growth (fatty acid biosynthesis)
3HAD140	3-hydroxyacyl-[acyl-carrier-protein] dehydratase (n-C14:0)	3hmrsACP[c] -> h2o[c] + tmrs2eACP[c]				Cell Envelope Biosynthesis	0	0	1000	0	1	4.2.1.58	Required for growth (fatty acid biosynthesis)
3HAD141	3-hydroxyacyl-[acyl-carrier-protein] dehydratase (n-C14:1)	3hcmrs7eACP[c] -> h2o[c] + t3c7mrseACP[c]				Cell Envelope Biosynthesis	0	0	1000	0	1	4.2.1.58	Required for growth (fatty acid biosynthesis)
3HAD150	3-hydroxyacyl-[acyl-carrier-protein] dehydratase (n-C15:0)	3hptdcaACP[c] -> h2o[c] + tptdca2eACP[c]				Cell Envelope Biosynthesis	0	0	1000	0	1	4.2.1.58	Required for growth (fatty acid biosynthesis)
3HAD160	3-hydroxyacyl-[acyl-carrier-protein] dehydratase (n-C16:0)	3hpalmACP[c] -> h2o[c] + tpalm2eACP[c]				Cell Envelope Biosynthesis	0	0	1000	0	1	4.2.1.58	Required for growth (fatty acid biosynthesis)
3HAD161	3-hydroxyacyl-[acyl-carrier-protein] dehydratase (n-C16:1)	3hcpalm9eACP[c] -> h2o[c] + t3c9palmeACP[c]				Cell Envelope Biosynthesis	0	0	1000	0	1	4.2.1.58	Required for growth (fatty acid biosynthesis)
3HAD170	3-hydroxyacyl-[acyl-carrier-protein] dehydratase (n-C17:0)	3hhepdcaACP[c] -> h2o[c] + thepdca2eACP[c]				Cell Envelope Biosynthesis	0	0	1000	0	1	4.2.1.58	Required for growth (fatty acid biosynthesis)
3HAD180	3-hydroxyacyl-[acyl-carrier-protein] dehydratase (n-C18:0)	3hoctaACP[c] -> h2o[c] + toctd2eACP[c]				Cell Envelope Biosynthesis	0	0	1000	0	1	4.2.1.58	Required for growth (fatty acid biosynthesis)
3HAD181	3-hydroxyacyl-[acyl-carrier-protein] dehydratase (n-C18:1)	3hcvac11eACP[c] -> h2o[c] + t3c11vaceACP[c]				Cell Envelope Biosynthesis	0	0	1000	0	1	4.2.1.58	Required for growth (fatty acid biosynthesis)
3HAD40	3-hydroxyacyl-[acyl-carrier-protein] dehydratase (n-C4:0)	3haACP[c] -> but2eACP[c] + h2o[c]				Cell Envelope Biosynthesis	0	0	1000	0	1	4.2.1.58	Required for growth (fatty acid biosynthesis)
3HAD50	3-hydroxyacyl-[acyl-carrier-protein] dehydratase (n-C5:0)	3hptnACP[c] -> h2o[c] + tptn2eACP[c]				Cell Envelope Biosynthesis	0	0	1000	0	1	4.2.1.58	Required for growth (fatty acid biosynthesis)
3HAD60	3-hydroxyacyl-[acyl-carrier-protein] dehydratase (n-C6:0)	3hhexACP[c] -> h2o[c] + thex2eACP[c]				Cell Envelope Biosynthesis	0	0	1000	0	1	4.2.1.58	Required for growth (fatty acid biosynthesis)
3HAD70	3-hydroxyacyl-[acyl-carrier-protein] dehydratase (n-C7:0)	3hhepACP[c] -> h2o[c] + thep2eACP[c]				Cell Envelope Biosynthesis	0	0	1000	0	1	4.2.1.58	Required for growth (fatty acid biosynthesis)
3HAD80	3-hydroxyacyl-[acyl-carrier-protein] dehydratase (n-C8:0)	3hoctACP[c] -> h2o[c] + toct2eACP[c]				Cell Envelope Biosynthesis	0	0	1000	0	1	4.2.1.58	Required for growth (fatty acid biosynthesis)
3HAD90	3-hydroxyacyl-[acyl-carrier-protein] dehydratase (n-C9:0)	3hnonACP[c] -> h2o[c] + tnon2eACP[c]				Cell Envelope Biosynthesis	0	0	1000	0	1	4.2.1.58	Required for growth (fatty acid biosynthesis)
3HADai110	3-hydroxyacyl-[acyl-carrier-protein] dehydratase (ante-iso-C11:0)	3haiC11ACP[c] -> h2o[c] + taiC112eACP[c]				Cell Envelope Biosynthesis	0	0	1000	0	1	4.2.1.58	Required for growth (fatty acid biosynthesis)
3HADai130	3-hydroxyacyl-[acyl-carrier-protein] dehydratase (ante-iso-C13:0)	3haiC13ACP[c] -> h2o[c] + taiC132eACP[c]				Cell Envelope Biosynthesis	0	0	1000	0	1	4.2.1.58	Required for growth (fatty acid biosynthesis)
3HADai150	3-hydroxyacyl-[acyl-carrier-protein] dehydratase (ante-iso-C15:0)	3haiC15ACP[c] -> h2o[c] + taiC152eACP[c]				Cell Envelope Biosynthesis	0	0	1000	0	1	4.2.1.58	Required for growth (fatty acid biosynthesis)
3HADai170	3-hydroxyacyl-[acyl-carrier-protein] dehydratase (ante-iso-C17:0)	3haiC17ACP[c] -> h2o[c] + taiC172eACP[c]				Cell Envelope Biosynthesis	0	0	1000	0	1	4.2.1.58	Required for growth (fatty acid biosynthesis)
3HADai70	3-hydroxyacyl-[acyl-carrier-protein] dehydratase (ante-iso-C7:0)	3haiC7ACP[c] -> h2o[c] + taiC72eACP[c]				Cell Envelope Biosynthesis	0	0	1000	0	1	4.2.1.58	Required for growth (fatty acid biosynthesis)
3HADai90	3-hydroxyacyl-[acyl-carrier-protein] dehydratase (ante-iso-C9:0)	3haiC9ACP[c] -> h2o[c] + taiC92eACP[c]				Cell Envelope Biosynthesis	0	0	1000	0	1	4.2.1.58	Required for growth (fatty acid biosynthesis)
3HADi100	3-hydroxyacyl-[acyl-carrier-protein] dehydratase (iso-C10:0)	3hiC10ACP[c] -> h2o[c] + tiC102eACP[c]				Cell Envelope Biosynthesis	0	0	1000	0	1	4.2.1.58	Required for growth (fatty acid biosynthesis)
3HADi110	3-hydroxyacyl-[acyl-carrier-protein] dehydratase (iso-C11:0)	3hiC11ACP[c] -> h2o[c] + tiC112eACP[c]				Cell Envelope Biosynthesis	0	0	1000	0	1	4.2.1.58	Required for growth (fatty acid biosynthesis)
3HADi120	3-hydroxyacyl-[acyl-carrier-protein] dehydratase (iso-C12:0)	3hiC12ACP[c] -> h2o[c] + tiC122eACP[c]				Cell Envelope Biosynthesis	0	0	1000	0	1	4.2.1.58	Required for growth (fatty acid biosynthesis)
3HADi130	3-hydroxyacyl-[acyl-carrier-protein] dehydratase (iso-C13:0)	3hiC13ACP[c] -> h2o[c] + tiC132eACP[c]				Cell Envelope Biosynthesis	0	0	1000	0	1	4.2.1.58	Required for growth (fatty acid biosynthesis)
3HADi140	3-hydroxyacyl-[acyl-carrier-protein] dehydratase (iso-C14:0)	3hiC14ACP[c] -> h2o[c] + tiC142eACP[c]				Cell Envelope Biosynthesis	0	0	1000	0	1	4.2.1.58	Required for growth (fatty acid biosynthesis)
3HADi150	3-hydroxyacyl-[acyl-carrier-protein] dehydratase (iso-C15:0)	3hiC15ACP[c] -> h2o[c] + tiC152eACP[c]				Cell Envelope Biosynthesis	0	0	1000	0	1	4.2.1.58	Required for growth (fatty acid biosynthesis)
3HADi160	3-hydroxyacyl-[acyl-carrier-protein] dehydratase (iso-C16:0)	3hiC16ACP[c] -> h2o[c] + tiC162eACP[c]				Cell Envelope Biosynthesis	0	0	1000	0	1	4.2.1.58	Required for growth (fatty acid biosynthesis)
3HADi170	3-hydroxyacyl-[acyl-carrier-protein] dehydratase (iso-C17:0)	3hiC17ACP[c] -> h2o[c] + tiC172eACP[c]				Cell Envelope Biosynthesis	0	0	1000	0	1	4.2.1.58	Required for growth (fatty acid biosynthesis)
3HADi180	3-hydroxyacyl-[acyl-carrier-protein] dehydratase (iso-C18:0)	3hiC18ACP[c] -> h2o[c] + tiC182eACP[c]				Cell Envelope Biosynthesis	0	0	1000	0	1	4.2.1.58	Required for growth (fatty acid biosynthesis)
3HADi60	3-hydroxyacyl-[acyl-carrier-protein] dehydratase (iso-C6:0)	3hiC6ACP[c] -> h2o[c] + tiC62eACP[c]				Cell Envelope Biosynthesis	0	0	1000	0	1	4.2.1.58	Required for growth (fatty acid biosynthesis)
3HADi70	3-hydroxyacyl-[acyl-carrier-protein] dehydratase (iso-C7:0)	3hiC7ACP[c] -> h2o[c] + tiC72eACP[c]				Cell Envelope Biosynthesis	0	0	1000	0	1	4.2.1.58	Required for growth (fatty acid biosynthesis)
3HADi80	3-hydroxyacyl-[acyl-carrier-protein] dehydratase (iso-C8:0)	3hiC8ACP[c] -> h2o[c] + tiC82eACP[c]				Cell Envelope Biosynthesis	0	0	1000	0	1	4.2.1.58	Required for growth (fatty acid biosynthesis)
3HADi90	3-hydroxyacyl-[acyl-carrier-protein] dehydratase (iso-C9:0)	3hiC9ACP[c] -> h2o[c] + tiC92eACP[c]				Cell Envelope Biosynthesis	0	0	1000	0	1	4.2.1.58	Required for growth (fatty acid biosynthesis)
3OAR100	3-oxoacyl-[acyl-carrier-protein] reductase (n-C10:0)	3odecACP[c] + h[c] + nadph[c] <=> 3hdecACP[c] + nadp[c]	(SCO1815 or SCO1345 or SCO1346 or SCO4501 or SCO1831 or SCO4681 or SCO0330)	SCO1815 SCO1345 SCO1346 SCO4501 SCO1831 SCO4681 SCO0330	fabG fabG2 fabG3	Cell Envelope Biosynthesis	1	-1000	1000	0	4	1.1.1.100		Tang Y, Lee HY, Tang Y, Kim CY, Mathews I, Khosla C.#2006#Structural and functional studies on SCO1815: a beta-ketoacyl-acyl carrier protein reductase from Streptomyces coelicolor A3(2).#Biochemistry.#45#14085-14093#
3OAR110	3-oxoacyl-[acyl-carrier-protein] reductase (n-C11:0)	3oundcaACP[c] + h[c] + nadph[c] <=> 3hundcaACP[c] + nadp[c]	(SCO1815 or SCO1345 or SCO1346 or SCO4501 or SCO1831 or SCO4681 or SCO0330)	SCO1815 SCO1345 SCO1346 SCO4501 SCO1831 SCO4681 SCO0330	fabG fabG2 fabG3	Cell Envelope Biosynthesis	1	-1000	1000	0	4	1.1.1.100		Tang Y, Lee HY, Tang Y, Kim CY, Mathews I, Khosla C.#2006#Structural and functional studies on SCO1815: a beta-ketoacyl-acyl carrier protein reductase from Streptomyces coelicolor A3(2).#Biochemistry.#45#14085-14093#
3OAR120	3-oxoacyl-[acyl-carrier-protein] reductase (n-C12:0)	3oddecACP[c] + h[c] + nadph[c] <=> 3hddecACP[c] + nadp[c]	(SCO1815 or SCO1345 or SCO1346 or SCO4501 or SCO1831 or SCO4681 or SCO0330)	SCO1815 SCO1345 SCO1346 SCO4501 SCO1831 SCO4681 SCO0330	fabG fabG2 fabG3	Cell Envelope Biosynthesis	1	-1000	1000	0	4	1.1.1.100		Tang Y, Lee HY, Tang Y, Kim CY, Mathews I, Khosla C.#2006#Structural and functional studies on SCO1815: a beta-ketoacyl-acyl carrier protein reductase from Streptomyces coelicolor A3(2).#Biochemistry.#45#14085-14093#
3OAR121	3-oxoacyl-[acyl-carrier-protein] reductase (n-C12:1)	3ocddec5eACP[c] + h[c] + nadph[c] <=> 3hcddec5eACP[c] + nadp[c]	(SCO1815 or SCO1345 or SCO1346 or SCO4501 or SCO1831 or SCO4681 or SCO0330)	SCO1815 SCO1345 SCO1346 SCO4501 SCO1831 SCO4681 SCO0330	fabG fabG2 fabG3	Cell Envelope Biosynthesis	1	-1000	1000	0	4	1.1.1.100		Tang Y, Lee HY, Tang Y, Kim CY, Mathews I, Khosla C.#2006#Structural and functional studies on SCO1815: a beta-ketoacyl-acyl carrier protein reductase from Streptomyces coelicolor A3(2).#Biochemistry.#45#14085-14093#
3OAR130	3-oxoacyl-[acyl-carrier-protein] reductase (n-C13:0)	3otridcaACP[c] + h[c] + nadph[c] <=> 3htridcaACP[c] + nadp[c]	(SCO1815 or SCO1345 or SCO1346 or SCO4501 or SCO1831 or SCO4681 or SCO0330)	SCO1815 SCO1345 SCO1346 SCO4501 SCO1831 SCO4681 SCO0330	fabG fabG2 fabG3	Cell Envelope Biosynthesis	1	-1000	1000	0	4	1.1.1.100		Tang Y, Lee HY, Tang Y, Kim CY, Mathews I, Khosla C.#2006#Structural and functional studies on SCO1815: a beta-ketoacyl-acyl carrier protein reductase from Streptomyces coelicolor A3(2).#Biochemistry.#45#14085-14093#
3OAR140	3-oxoacyl-[acyl-carrier-protein] reductase (n-C14:0)	3omrsACP[c] + h[c] + nadph[c] <=> 3hmrsACP[c] + nadp[c]	(SCO1815 or SCO1345 or SCO1346 or SCO4501 or SCO1831 or SCO4681 or SCO0330)	SCO1815 SCO1345 SCO1346 SCO4501 SCO1831 SCO4681 SCO0330	fabG fabG2 fabG3	Cell Envelope Biosynthesis	1	-1000	1000	0	4	1.1.1.100		Tang Y, Lee HY, Tang Y, Kim CY, Mathews I, Khosla C.#2006#Structural and functional studies on SCO1815: a beta-ketoacyl-acyl carrier protein reductase from Streptomyces coelicolor A3(2).#Biochemistry.#45#14085-14093#
3OAR141	3-oxoacyl-[acyl-carrier-protein] reductase (n-C14:1)	3ocmrs7eACP[c] + h[c] + nadph[c] <=> 3hcmrs7eACP[c] + nadp[c]	(SCO1815 or SCO1345 or SCO1346 or SCO4501 or SCO1831 or SCO4681 or SCO0330)	SCO1815 SCO1345 SCO1346 SCO4501 SCO1831 SCO4681 SCO0330	fabG fabG2 fabG3	Cell Envelope Biosynthesis	1	-1000	1000	0	4	1.1.1.100		Tang Y, Lee HY, Tang Y, Kim CY, Mathews I, Khosla C.#2006#Structural and functional studies on SCO1815: a beta-ketoacyl-acyl carrier protein reductase from Streptomyces coelicolor A3(2).#Biochemistry.#45#14085-14093#
3OAR150	3-oxoacyl-[acyl-carrier-protein] reductase (n-C15:0)	3optdcaACP[c] + h[c] + nadph[c] <=> 3hptdcaACP[c] + nadp[c]	(SCO1815 or SCO1345 or SCO1346 or SCO4501 or SCO1831 or SCO4681 or SCO0330)	SCO1815 SCO1345 SCO1346 SCO4501 SCO1831 SCO4681 SCO0330	fabG fabG2 fabG3	Cell Envelope Biosynthesis	1	-1000	1000	0	4	1.1.1.100		Tang Y, Lee HY, Tang Y, Kim CY, Mathews I, Khosla C.#2006#Structural and functional studies on SCO1815: a beta-ketoacyl-acyl carrier protein reductase from Streptomyces coelicolor A3(2).#Biochemistry.#45#14085-14093#
3OAR160	3-oxoacyl-[acyl-carrier-protein] reductase (n-C16:0)	3opalmACP[c] + h[c] + nadph[c] <=> 3hpalmACP[c] + nadp[c]	(SCO1815 or SCO1345 or SCO1346 or SCO4501 or SCO1831 or SCO4681 or SCO0330)	SCO1815 SCO1345 SCO1346 SCO4501 SCO1831 SCO4681 SCO0330	fabG fabG2 fabG3	Cell Envelope Biosynthesis	1	-1000	1000	0	4	1.1.1.100		Tang Y, Lee HY, Tang Y, Kim CY, Mathews I, Khosla C.#2006#Structural and functional studies on SCO1815: a beta-ketoacyl-acyl carrier protein reductase from Streptomyces coelicolor A3(2).#Biochemistry.#45#14085-14093#
3OAR161	3-oxoacyl-[acyl-carrier-protein] reductase (n-C16:1)	3ocpalm9eACP[c] + h[c] + nadph[c] <=> 3hcpalm9eACP[c] + nadp[c]	(SCO1815 or SCO1345 or SCO1346 or SCO4501 or SCO1831 or SCO4681 or SCO0330)	SCO1815 SCO1345 SCO1346 SCO4501 SCO1831 SCO4681 SCO0330	fabG fabG2 fabG3	Cell Envelope Biosynthesis	1	-1000	1000	0	4	1.1.1.100		Tang Y, Lee HY, Tang Y, Kim CY, Mathews I, Khosla C.#2006#Structural and functional studies on SCO1815: a beta-ketoacyl-acyl carrier protein reductase from Streptomyces coelicolor A3(2).#Biochemistry.#45#14085-14093#
3OAR170	3-oxoacyl-[acyl-carrier-protein] reductase (n-C17:0)	3ohepdcaACP[c] + h[c] + nadph[c] <=> 3hhepdcaACP[c] + nadp[c]	(SCO1815 or SCO1345 or SCO1346 or SCO4501 or SCO1831 or SCO4681 or SCO0330)	SCO1815 SCO1345 SCO1346 SCO4501 SCO1831 SCO4681 SCO0330	fabG fabG2 fabG3	Cell Envelope Biosynthesis	1	-1000	1000	0	4	1.1.1.100		Tang Y, Lee HY, Tang Y, Kim CY, Mathews I, Khosla C.#2006#Structural and functional studies on SCO1815: a beta-ketoacyl-acyl carrier protein reductase from Streptomyces coelicolor A3(2).#Biochemistry.#45#14085-14093#
3OAR180	3-oxoacyl-[acyl-carrier-protein] reductase (n-C18:0)	3ooctdACP[c] + h[c] + nadph[c] <=> 3hoctaACP[c] + nadp[c]	(SCO1815 or SCO1345 or SCO1346 or SCO4501 or SCO1831 or SCO4681 or SCO0330)	SCO1815 SCO1345 SCO1346 SCO4501 SCO1831 SCO4681 SCO0330	fabG fabG2 fabG3	Cell Envelope Biosynthesis	1	-1000	1000	0	4	1.1.1.100		Tang Y, Lee HY, Tang Y, Kim CY, Mathews I, Khosla C.#2006#Structural and functional studies on SCO1815: a beta-ketoacyl-acyl carrier protein reductase from Streptomyces coelicolor A3(2).#Biochemistry.#45#14085-14093#
3OAR181	3-oxoacyl-[acyl-carrier-protein] reductase (n-C18:1)	3ocvac11eACP[c] + h[c] + nadph[c] <=> 3hcvac11eACP[c] + nadp[c]	(SCO1815 or SCO1345 or SCO1346 or SCO4501 or SCO1831 or SCO4681 or SCO0330)	SCO1815 SCO1345 SCO1346 SCO4501 SCO1831 SCO4681 SCO0330	fabG fabG2 fabG3	Cell Envelope Biosynthesis	1	-1000	1000	0	4	1.1.1.100		Tang Y, Lee HY, Tang Y, Kim CY, Mathews I, Khosla C.#2006#Structural and functional studies on SCO1815: a beta-ketoacyl-acyl carrier protein reductase from Streptomyces coelicolor A3(2).#Biochemistry.#45#14085-14093#
3OAR40	3-oxoacyl-[acyl-carrier-protein] reductase (n-C4:0)	actACP[c] + h[c] + nadph[c] <=> 3haACP[c] + nadp[c]	(SCO1815 or SCO1345 or SCO1346 or SCO4501 or SCO1831 or SCO4681 or SCO0330)	SCO1815 SCO1345 SCO1346 SCO4501 SCO1831 SCO4681 SCO0330	fabG fabG2 fabG3	Cell Envelope Biosynthesis	1	-1000	1000	0	4	1.1.1.100		Tang Y, Lee HY, Tang Y, Kim CY, Mathews I, Khosla C.#2006#Structural and functional studies on SCO1815: a beta-ketoacyl-acyl carrier protein reductase from Streptomyces coelicolor A3(2).#Biochemistry.#45#14085-14093#
3OAR50	3-oxoacyl-[acyl-carrier-protein] reductase (n-C5:0)	3optnACP[c] + h[c] + nadph[c] <=> 3hptnACP[c] + nadp[c]	(SCO1815 or SCO1345 or SCO1346 or SCO4501 or SCO1831 or SCO4681 or SCO0330)	SCO1815 SCO1345 SCO1346 SCO4501 SCO1831 SCO4681 SCO0330	fabG fabG2 fabG3	Cell Envelope Biosynthesis	1	-1000	1000	0	4	1.1.1.100		Tang Y, Lee HY, Tang Y, Kim CY, Mathews I, Khosla C.#2006#Structural and functional studies on SCO1815: a beta-ketoacyl-acyl carrier protein reductase from Streptomyces coelicolor A3(2).#Biochemistry.#45#14085-14093#
3OAR60	3-oxoacyl-[acyl-carrier-protein] reductase (n-C6:0)	3ohexACP[c] + h[c] + nadph[c] <=> 3hhexACP[c] + nadp[c]	(SCO1815 or SCO1345 or SCO1346 or SCO4501 or SCO1831 or SCO4681 or SCO0330)	SCO1815 SCO1345 SCO1346 SCO4501 SCO1831 SCO4681 SCO0330	fabG fabG2 fabG3	Cell Envelope Biosynthesis	1	-1000	1000	0	4	1.1.1.100		Tang Y, Lee HY, Tang Y, Kim CY, Mathews I, Khosla C.#2006#Structural and functional studies on SCO1815: a beta-ketoacyl-acyl carrier protein reductase from Streptomyces coelicolor A3(2).#Biochemistry.#45#14085-14093#
3OAR70	3-oxoacyl-[acyl-carrier-protein] reductase (n-C7:0)	3ohepACP[c] + h[c] + nadph[c] <=> 3hhepACP[c] + nadp[c]	(SCO1815 or SCO1345 or SCO1346 or SCO4501 or SCO1831 or SCO4681 or SCO0330)	SCO1815 SCO1345 SCO1346 SCO4501 SCO1831 SCO4681 SCO0330	fabG fabG2 fabG3	Cell Envelope Biosynthesis	1	-1000	1000	0	4	1.1.1.100		Tang Y, Lee HY, Tang Y, Kim CY, Mathews I, Khosla C.#2006#Structural and functional studies on SCO1815: a beta-ketoacyl-acyl carrier protein reductase from Streptomyces coelicolor A3(2).#Biochemistry.#45#14085-14093#
3OAR80	3-oxoacyl-[acyl-carrier-protein] reductase (n-C8:0)	3ooctACP[c] + h[c] + nadph[c] <=> 3hoctACP[c] + nadp[c]	(SCO1815 or SCO1345 or SCO1346 or SCO4501 or SCO1831 or SCO4681 or SCO0330)	SCO1815 SCO1345 SCO1346 SCO4501 SCO1831 SCO4681 SCO0330	fabG fabG2 fabG3	Cell Envelope Biosynthesis	1	-1000	1000	0	4	1.1.1.100		Tang Y, Lee HY, Tang Y, Kim CY, Mathews I, Khosla C.#2006#Structural and functional studies on SCO1815: a beta-ketoacyl-acyl carrier protein reductase from Streptomyces coelicolor A3(2).#Biochemistry.#45#14085-14093#
3OAR90	3-oxoacyl-[acyl-carrier-protein] reductase (n-C9:0)	3ononACP[c] + h[c] + nadph[c] <=> 3hnonACP[c] + nadp[c]	(SCO1815 or SCO1345 or SCO1346 or SCO4501 or SCO1831 or SCO4681 or SCO0330)	SCO1815 SCO1345 SCO1346 SCO4501 SCO1831 SCO4681 SCO0330	fabG fabG2 fabG3	Cell Envelope Biosynthesis	1	-1000	1000	0	4	1.1.1.100		Tang Y, Lee HY, Tang Y, Kim CY, Mathews I, Khosla C.#2006#Structural and functional studies on SCO1815: a beta-ketoacyl-acyl carrier protein reductase from Streptomyces coelicolor A3(2).#Biochemistry.#45#14085-14093#
3OARai110	3-oxoacyl-[acyl-carrier-protein] reductase (ante-iso-C11:0)	3oaiC11ACP[c] + h[c] + nadph[c] <=> 3haiC11ACP[c] + nadp[c]	(SCO1815 or SCO1345 or SCO1346 or SCO4501 or SCO1831 or SCO4681 or SCO0330)	SCO1815 SCO1345 SCO1346 SCO4501 SCO1831 SCO4681 SCO0330	fabG fabG2 fabG3	Cell Envelope Biosynthesis	1	-1000	1000	0	4	1.1.1.100		Tang Y, Lee HY, Tang Y, Kim CY, Mathews I, Khosla C.#2006#Structural and functional studies on SCO1815: a beta-ketoacyl-acyl carrier protein reductase from Streptomyces coelicolor A3(2).#Biochemistry.#45#14085-14093#
3OARai130	3-oxoacyl-[acyl-carrier-protein] reductase (ante-iso-C13:0)	3oaiC13ACP[c] + h[c] + nadph[c] <=> 3haiC13ACP[c] + nadp[c]	(SCO1815 or SCO1345 or SCO1346 or SCO4501 or SCO1831 or SCO4681 or SCO0330)	SCO1815 SCO1345 SCO1346 SCO4501 SCO1831 SCO4681 SCO0330	fabG fabG2 fabG3	Cell Envelope Biosynthesis	1	-1000	1000	0	4	1.1.1.100		Tang Y, Lee HY, Tang Y, Kim CY, Mathews I, Khosla C.#2006#Structural and functional studies on SCO1815: a beta-ketoacyl-acyl carrier protein reductase from Streptomyces coelicolor A3(2).#Biochemistry.#45#14085-14093#
3OARai150	3-oxoacyl-[acyl-carrier-protein] reductase (ante-iso-C15:0)	3oaiC15ACP[c] + h[c] + nadph[c] <=> 3haiC15ACP[c] + nadp[c]	(SCO1815 or SCO1345 or SCO1346 or SCO4501 or SCO1831 or SCO4681 or SCO0330)	SCO1815 SCO1345 SCO1346 SCO4501 SCO1831 SCO4681 SCO0330	fabG fabG2 fabG3	Cell Envelope Biosynthesis	1	-1000	1000	0	4	1.1.1.100		Tang Y, Lee HY, Tang Y, Kim CY, Mathews I, Khosla C.#2006#Structural and functional studies on SCO1815: a beta-ketoacyl-acyl carrier protein reductase from Streptomyces coelicolor A3(2).#Biochemistry.#45#14085-14093#
3OARai170	3-oxoacyl-[acyl-carrier-protein] reductase (ante-iso-C17:0)	3oaiC17ACP[c] + h[c] + nadph[c] <=> 3haiC17ACP[c] + nadp[c]	(SCO1815 or SCO1345 or SCO1346 or SCO4501 or SCO1831 or SCO4681 or SCO0330)	SCO1815 SCO1345 SCO1346 SCO4501 SCO1831 SCO4681 SCO0330	fabG fabG2 fabG3	Cell Envelope Biosynthesis	1	-1000	1000	0	4	1.1.1.100		Tang Y, Lee HY, Tang Y, Kim CY, Mathews I, Khosla C.#2006#Structural and functional studies on SCO1815: a beta-ketoacyl-acyl carrier protein reductase from Streptomyces coelicolor A3(2).#Biochemistry.#45#14085-14093#
3OARai70	3-oxoacyl-[acyl-carrier-protein] reductase (ante-iso-C7:0)	3oaiC7ACP[c] + h[c] + nadph[c] <=> 3haiC7ACP[c] + nadp[c]	(SCO1815 or SCO1345 or SCO1346 or SCO4501 or SCO1831 or SCO4681 or SCO0330)	SCO1815 SCO1345 SCO1346 SCO4501 SCO1831 SCO4681 SCO0330	fabG fabG2 fabG3	Cell Envelope Biosynthesis	1	-1000	1000	0	4	1.1.1.100		Tang Y, Lee HY, Tang Y, Kim CY, Mathews I, Khosla C.#2006#Structural and functional studies on SCO1815: a beta-ketoacyl-acyl carrier protein reductase from Streptomyces coelicolor A3(2).#Biochemistry.#45#14085-14093#
3OARai90	3-oxoacyl-[acyl-carrier-protein] reductase (ante-iso-C9:0)	3oaiC9ACP[c] + h[c] + nadph[c] <=> 3haiC9ACP[c] + nadp[c]	(SCO1815 or SCO1345 or SCO1346 or SCO4501 or SCO1831 or SCO4681 or SCO0330)	SCO1815 SCO1345 SCO1346 SCO4501 SCO1831 SCO4681 SCO0330	fabG fabG2 fabG3	Cell Envelope Biosynthesis	1	-1000	1000	0	4	1.1.1.100		Tang Y, Lee HY, Tang Y, Kim CY, Mathews I, Khosla C.#2006#Structural and functional studies on SCO1815: a beta-ketoacyl-acyl carrier protein reductase from Streptomyces coelicolor A3(2).#Biochemistry.#45#14085-14093#
3OARi100	3-oxoacyl-[acyl-carrier-protein] reductase (iso-C10:0)	3oiC10ACP[c] + h[c] + nadph[c] <=> 3hiC10ACP[c] + nadp[c]	(SCO1815 or SCO1345 or SCO1346 or SCO4501 or SCO1831 or SCO4681 or SCO0330)	SCO1815 SCO1345 SCO1346 SCO4501 SCO1831 SCO4681 SCO0330	fabG fabG2 fabG3	Cell Envelope Biosynthesis	1	-1000	1000	0	4	1.1.1.100		Tang Y, Lee HY, Tang Y, Kim CY, Mathews I, Khosla C.#2006#Structural and functional studies on SCO1815: a beta-ketoacyl-acyl carrier protein reductase from Streptomyces coelicolor A3(2).#Biochemistry.#45#14085-14093#
3OARi110	3-oxoacyl-[acyl-carrier-protein] reductase (iso-C11:0)	3oiC11ACP[c] + h[c] + nadph[c] <=> 3hiC11ACP[c] + nadp[c]	(SCO1815 or SCO1345 or SCO1346 or SCO4501 or SCO1831 or SCO4681 or SCO0330)	SCO1815 SCO1345 SCO1346 SCO4501 SCO1831 SCO4681 SCO0330	fabG fabG2 fabG3	Cell Envelope Biosynthesis	1	-1000	1000	0	4	1.1.1.100		Tang Y, Lee HY, Tang Y, Kim CY, Mathews I, Khosla C.#2006#Structural and functional studies on SCO1815: a beta-ketoacyl-acyl carrier protein reductase from Streptomyces coelicolor A3(2).#Biochemistry.#45#14085-14093#
3OARi120	3-oxoacyl-[acyl-carrier-protein] reductase (iso-C12:0)	3oiC12ACP[c] + h[c] + nadph[c] <=> 3hiC12ACP[c] + nadp[c]	(SCO1815 or SCO1345 or SCO1346 or SCO4501 or SCO1831 or SCO4681 or SCO0330)	SCO1815 SCO1345 SCO1346 SCO4501 SCO1831 SCO4681 SCO0330	fabG fabG2 fabG3	Cell Envelope Biosynthesis	1	-1000	1000	0	4	1.1.1.100		Tang Y, Lee HY, Tang Y, Kim CY, Mathews I, Khosla C.#2006#Structural and functional studies on SCO1815: a beta-ketoacyl-acyl carrier protein reductase from Streptomyces coelicolor A3(2).#Biochemistry.#45#14085-14093#
3OARi130	3-oxoacyl-[acyl-carrier-protein] reductase (iso-C13:0)	3oiC13ACP[c] + h[c] + nadph[c] <=> 3hiC13ACP[c] + nadp[c]	(SCO1815 or SCO1345 or SCO1346 or SCO4501 or SCO1831 or SCO4681 or SCO0330)	SCO1815 SCO1345 SCO1346 SCO4501 SCO1831 SCO4681 SCO0330	fabG fabG2 fabG3	Cell Envelope Biosynthesis	1	-1000	1000	0	4	1.1.1.100		Tang Y, Lee HY, Tang Y, Kim CY, Mathews I, Khosla C.#2006#Structural and functional studies on SCO1815: a beta-ketoacyl-acyl carrier protein reductase from Streptomyces coelicolor A3(2).#Biochemistry.#45#14085-14093#
3OARi140	3-oxoacyl-[acyl-carrier-protein] reductase (iso-C14:0)	3oiC14ACP[c] + h[c] + nadph[c] <=> 3hiC14ACP[c] + nadp[c]	(SCO1815 or SCO1345 or SCO1346 or SCO4501 or SCO1831 or SCO4681 or SCO0330)	SCO1815 SCO1345 SCO1346 SCO4501 SCO1831 SCO4681 SCO0330	fabG fabG2 fabG3	Cell Envelope Biosynthesis	1	-1000	1000	0	4	1.1.1.100		Tang Y, Lee HY, Tang Y, Kim CY, Mathews I, Khosla C.#2006#Structural and functional studies on SCO1815: a beta-ketoacyl-acyl carrier protein reductase from Streptomyces coelicolor A3(2).#Biochemistry.#45#14085-14093#
3OARi150	3-oxoacyl-[acyl-carrier-protein] reductase (iso-C15:0)	3oiC15ACP[c] + h[c] + nadph[c] <=> 3hiC15ACP[c] + nadp[c]	(SCO1815 or SCO1345 or SCO1346 or SCO4501 or SCO1831 or SCO4681 or SCO0330)	SCO1815 SCO1345 SCO1346 SCO4501 SCO1831 SCO4681 SCO0330	fabG fabG2 fabG3	Cell Envelope Biosynthesis	1	-1000	1000	0	4	1.1.1.100		Tang Y, Lee HY, Tang Y, Kim CY, Mathews I, Khosla C.#2006#Structural and functional studies on SCO1815: a beta-ketoacyl-acyl carrier protein reductase from Streptomyces coelicolor A3(2).#Biochemistry.#45#14085-14093#
3OARi160	3-oxoacyl-[acyl-carrier-protein] reductase (iso-C16:0)	3oiC16ACP[c] + h[c] + nadph[c] <=> 3hiC16ACP[c] + nadp[c]	(SCO1815 or SCO1345 or SCO1346 or SCO4501 or SCO1831 or SCO4681 or SCO0330)	SCO1815 SCO1345 SCO1346 SCO4501 SCO1831 SCO4681 SCO0330	fabG fabG2 fabG3	Cell Envelope Biosynthesis	1	-1000	1000	0	4	1.1.1.100		Tang Y, Lee HY, Tang Y, Kim CY, Mathews I, Khosla C.#2006#Structural and functional studies on SCO1815: a beta-ketoacyl-acyl carrier protein reductase from Streptomyces coelicolor A3(2).#Biochemistry.#45#14085-14093#
3OARi170	3-oxoacyl-[acyl-carrier-protein] reductase (iso-C17:0)	3oiC17ACP[c] + h[c] + nadph[c] <=> 3hiC17ACP[c] + nadp[c]	(SCO1815 or SCO1345 or SCO1346 or SCO4501 or SCO1831 or SCO4681 or SCO0330)	SCO1815 SCO1345 SCO1346 SCO4501 SCO1831 SCO4681 SCO0330	fabG fabG2 fabG3	Cell Envelope Biosynthesis	1	-1000	1000	0	4	1.1.1.100		Tang Y, Lee HY, Tang Y, Kim CY, Mathews I, Khosla C.#2006#Structural and functional studies on SCO1815: a beta-ketoacyl-acyl carrier protein reductase from Streptomyces coelicolor A3(2).#Biochemistry.#45#14085-14093#
3OARi180	3-oxoacyl-[acyl-carrier-protein] reductase (iso-C18:0)	3oiC18ACP[c] + h[c] + nadph[c] <=> 3hiC18ACP[c] + nadp[c]	(SCO1815 or SCO1345 or SCO1346 or SCO4501 or SCO1831 or SCO4681 or SCO0330)	SCO1815 SCO1345 SCO1346 SCO4501 SCO1831 SCO4681 SCO0330	fabG fabG2 fabG3	Cell Envelope Biosynthesis	1	-1000	1000	0	4	1.1.1.100		Tang Y, Lee HY, Tang Y, Kim CY, Mathews I, Khosla C.#2006#Structural and functional studies on SCO1815: a beta-ketoacyl-acyl carrier protein reductase from Streptomyces coelicolor A3(2).#Biochemistry.#45#14085-14093#
3OARi60	3-oxoacyl-[acyl-carrier-protein] reductase (iso-C6:0)	3oiC6ACP[c] + h[c] + nadph[c] <=> 3hiC6ACP[c] + nadp[c]	(SCO1815 or SCO1345 or SCO1346 or SCO4501 or SCO1831 or SCO4681 or SCO0330)	SCO1815 SCO1345 SCO1346 SCO4501 SCO1831 SCO4681 SCO0330	fabG fabG2 fabG3	Cell Envelope Biosynthesis	1	-1000	1000	0	4	1.1.1.100		Tang Y, Lee HY, Tang Y, Kim CY, Mathews I, Khosla C.#2006#Structural and functional studies on SCO1815: a beta-ketoacyl-acyl carrier protein reductase from Streptomyces coelicolor A3(2).#Biochemistry.#45#14085-14093#
3OARi70	3-oxoacyl-[acyl-carrier-protein] reductase (iso-C7:0)	3oiC7ACP[c] + h[c] + nadph[c] <=> 3hiC7ACP[c] + nadp[c]	(SCO1815 or SCO1345 or SCO1346 or SCO4501 or SCO1831 or SCO4681 or SCO0330)	SCO1815 SCO1345 SCO1346 SCO4501 SCO1831 SCO4681 SCO0330	fabG fabG2 fabG3	Cell Envelope Biosynthesis	1	-1000	1000	0	4	1.1.1.100		Tang Y, Lee HY, Tang Y, Kim CY, Mathews I, Khosla C.#2006#Structural and functional studies on SCO1815: a beta-ketoacyl-acyl carrier protein reductase from Streptomyces coelicolor A3(2).#Biochemistry.#45#14085-14093#
3OARi80	3-oxoacyl-[acyl-carrier-protein] reductase (iso-C8:0)	3oiC8ACP[c] + h[c] + nadph[c] <=> 3hiC8ACP[c] + nadp[c]	(SCO1815 or SCO1345 or SCO1346 or SCO4501 or SCO1831 or SCO4681 or SCO0330)	SCO1815 SCO1345 SCO1346 SCO4501 SCO1831 SCO4681 SCO0330	fabG fabG2 fabG3	Cell Envelope Biosynthesis	1	-1000	1000	0	4	1.1.1.100		Tang Y, Lee HY, Tang Y, Kim CY, Mathews I, Khosla C.#2006#Structural and functional studies on SCO1815: a beta-ketoacyl-acyl carrier protein reductase from Streptomyces coelicolor A3(2).#Biochemistry.#45#14085-14093#
3OARi90	3-oxoacyl-[acyl-carrier-protein] reductase (iso-C9:0)	3oiC9ACP[c] + h[c] + nadph[c] <=> 3hiC9ACP[c] + nadp[c]	(SCO1815 or SCO1345 or SCO1346 or SCO4501 or SCO1831 or SCO4681 or SCO0330)	SCO1815 SCO1345 SCO1346 SCO4501 SCO1831 SCO4681 SCO0330	fabG fabG2 fabG3	Cell Envelope Biosynthesis	1	-1000	1000	0	4	1.1.1.100		Tang Y, Lee HY, Tang Y, Kim CY, Mathews I, Khosla C.#2006#Structural and functional studies on SCO1815: a beta-ketoacyl-acyl carrier protein reductase from Streptomyces coelicolor A3(2).#Biochemistry.#45#14085-14093#
3OAS100	3-oxoacyl-[acyl-carrier-protein] synthase (n-C10:0)	h[c] + malACP[c] + ocACP[c] -> 3odecACP[c] + ACP[c] + co2[c]	(SCO0548 or (SCO2390 or SCO1266))	SCO0548 SCO2390 SCO1266	fabB2 fabF fabF2	Cell Envelope Biosynthesis	0	0	1000	0	2	2.3.1.41
3OAS110	3-oxoacyl-[acyl-carrier-protein] synthase (n-C11:0)	nonACP[c] + h[c] + malACP[c] -> 3oundcaACP[c] + ACP[c] + co2[c]	(SCO0548 or (SCO2390 or SCO1266))	SCO0548 SCO2390 SCO1266	fabB2 fabF fabF2	Cell Envelope Biosynthesis	0	0	1000	0	2	2.3.1.41
3OAS120	3-oxoacyl-[acyl-carrier-protein] synthase (n-C12:0)	dcaACP[c] + h[c] + malACP[c] -> 3oddecACP[c] + ACP[c] + co2[c]	(SCO0548 or (SCO2390 or SCO1266))	SCO0548 SCO2390 SCO1266	fabB2 fabF fabF2	Cell Envelope Biosynthesis	0	0	1000	0	2	2.3.1.41
3OAS121	3-oxoacyl-[acyl-carrier-protein] synthase (n-C12:1)	cdec3eACP[c] + h[c] + malACP[c] -> 3ocddec5eACP[c] + ACP[c] + co2[c]	(SCO0548 or (SCO2390 or SCO1266))	SCO0548 SCO2390 SCO1266	fabB2 fabF fabF2	Cell Envelope Biosynthesis	0	0	1000	0	2	2.3.1.41
3OAS130	3-oxoacyl-[acyl-carrier-protein] synthase (n-C13:0)	undcaACP[c] + h[c] + malACP[c] -> 3otridcaACP[c] + ACP[c] + co2[c]	(SCO0548 or (SCO2390 or SCO1266))	SCO0548 SCO2390 SCO1266	fabB2 fabF fabF2	Cell Envelope Biosynthesis	0	0	1000	0	2	2.3.1.41
3OAS140	3-oxoacyl-[acyl-carrier-protein] synthase (n-C14:0)	ddcaACP[c] + h[c] + malACP[c] -> 3omrsACP[c] + ACP[c] + co2[c]	(SCO0548 or (SCO2390 or SCO1266))	SCO0548 SCO2390 SCO1266	fabB2 fabF fabF2	Cell Envelope Biosynthesis	0	0	1000	0	2	2.3.1.41
3OAS141	3-oxoacyl-[acyl-carrier-protein] synthase (n-C14:1)	cddec5eACP[c] + h[c] + malACP[c] -> 3ocmrs7eACP[c] + ACP[c] + co2[c]	(SCO0548 or (SCO2390 or SCO1266))	SCO0548 SCO2390 SCO1266	fabB2 fabF fabF2	Cell Envelope Biosynthesis	0	0	1000	0	2	2.3.1.41
3OAS150	3-oxoacyl-[acyl-carrier-protein] synthase (n-C15:0)	tridcaACP[c] + h[c] + malACP[c] -> 3optdcaACP[c] + ACP[c] + co2[c]	(SCO0548 or (SCO2390 or SCO1266))	SCO0548 SCO2390 SCO1266	fabB2 fabF fabF2	Cell Envelope Biosynthesis	0	0	1000	0	2	2.3.1.41
3OAS160	3-oxoacyl-[acyl-carrier-protein] synthase (n-C16:0)	h[c] + malACP[c] + myrsACP[c] -> 3opalmACP[c] + ACP[c] + co2[c]	(SCO0548 or (SCO2390 or SCO1266))	SCO0548 SCO2390 SCO1266	fabB2 fabF fabF2	Cell Envelope Biosynthesis	0	0	1000	0	2	2.3.1.41
3OAS161	3-oxoacyl-[acyl-carrier-protein] synthase (n-C16:1)	h[c] + malACP[c] + tdeACP[c] -> 3ocpalm9eACP[c] + ACP[c] + co2[c]	(SCO0548 or (SCO2390 or SCO1266))	SCO0548 SCO2390 SCO1266	fabB2 fabF fabF2	Cell Envelope Biosynthesis	0	0	1000	0	2	2.3.1.41
3OAS170	3-oxoacyl-[acyl-carrier-protein] synthase (n-C17:0)	ptdcaACP[c] + h[c] + malACP[c] -> 3ohepdcaACP[c] + ACP[c] + co2[c]	(SCO0548 or (SCO2390 or SCO1266))	SCO0548 SCO2390 SCO1266	fabB2 fabF fabF2	Cell Envelope Biosynthesis	0	0	1000	0	2	2.3.1.41
3OAS180	3-oxoacyl-[acyl-carrier-protein] synthase (n-C18:0)	h[c] + malACP[c] + palmACP[c] -> 3ooctdACP[c] + ACP[c] + co2[c]	(SCO0548 or (SCO2390 or SCO1266))	SCO0548 SCO2390 SCO1266	fabB2 fabF fabF2	Cell Envelope Biosynthesis	0	0	1000	0	2	2.3.1.41
3OAS181	3-oxoacyl-[acyl-carrier-protein] synthase (n-C18:1)	h[c] + hdeACP[c] + malACP[c] -> 3ocvac11eACP[c] + ACP[c] + co2[c]	(SCO0548 or (SCO2390 or SCO1266))	SCO0548 SCO2390 SCO1266	fabB2 fabF fabF2	Cell Envelope Biosynthesis	0	0	1000	0	2	2.3.1.41
3OAS50	3-oxoacyl-[acyl-carrier-protein] synthase (n-C5:0)	ppACP[c] + h[c] + malACP[c] -> 3optnACP[c] + ACP[c] + co2[c]	(SCO0548 or (SCO2390 or SCO1266))	SCO0548 SCO2390 SCO1266	fabB2 fabF fabF2	Cell Envelope Biosynthesis	0	0	1000	0	2	2.3.1.41
3OAS60	3-oxoacyl-[acyl-carrier-protein] synthase (n-C6:0)	butACP[c] + h[c] + malACP[c] -> 3ohexACP[c] + ACP[c] + co2[c]	(SCO0548 or (SCO2390 or SCO1266))	SCO0548 SCO2390 SCO1266	fabB2 fabF fabF2	Cell Envelope Biosynthesis	0	0	1000	0	2	2.3.1.41
3OAS70	3-oxoacyl-[acyl-carrier-protein] synthase (n-C7:0)	ptnACP[c] + h[c] + malACP[c] -> 3ohepACP[c] + ACP[c] + co2[c]	(SCO0548 or (SCO2390 or SCO1266))	SCO0548 SCO2390 SCO1266	fabB2 fabF fabF2	Cell Envelope Biosynthesis	0	0	1000	0	2	2.3.1.41
3OAS80	3-oxoacyl-[acyl-carrier-protein] synthase (n-C8:0)	h[c] + hexACP[c] + malACP[c] -> 3ooctACP[c] + ACP[c] + co2[c]	(SCO0548 or (SCO2390 or SCO1266))	SCO0548 SCO2390 SCO1266	fabB2 fabF fabF2	Cell Envelope Biosynthesis	0	0	1000	0	2	2.3.1.41
3OAS90	3-oxoacyl-[acyl-carrier-protein] synthase (n-C9:0)	hepACP[c] + h[c] + malACP[c] -> 3ononACP[c] + ACP[c] + co2[c]	(SCO0548 or (SCO2390 or SCO1266))	SCO0548 SCO2390 SCO1266	fabB2 fabF fabF2	Cell Envelope Biosynthesis	0	0	1000	0	2	2.3.1.41
3OASai110	3-oxoacyl-[acyl-carrier-protein] synthase (ante-iso-C11:0)	aiC9ACP[c] + h[c] + malACP[c] -> 3oaiC11ACP[c] + ACP[c] + co2[c]	(SCO0548 or (SCO2390 or SCO1266))	SCO0548 SCO2390 SCO1266	fabB2 fabF fabF2	Cell Envelope Biosynthesis	0	0	1000	0	2	2.3.1.41
3OASai130	3-oxoacyl-[acyl-carrier-protein] synthase (ante-iso-C13:0)	aiC11ACP[c] + h[c] + malACP[c] -> 3oaiC13ACP[c] + ACP[c] + co2[c]	(SCO0548 or (SCO2390 or SCO1266))	SCO0548 SCO2390 SCO1266	fabB2 fabF fabF2	Cell Envelope Biosynthesis	0	0	1000	0	2	2.3.1.41
3OASai150	3-oxoacyl-[acyl-carrier-protein] synthase (ante-iso-C15:0)	aiC13ACP[c] + h[c] + malACP[c] -> 3oaiC15ACP[c] + ACP[c] + co2[c]	(SCO0548 or (SCO2390 or SCO1266))	SCO0548 SCO2390 SCO1266	fabB2 fabF fabF2	Cell Envelope Biosynthesis	0	0	1000	0	2	2.3.1.41
3OASai170	3-oxoacyl-[acyl-carrier-protein] synthase (ante-iso-C17:0)	aiC15ACP[c] + h[c] + malACP[c] -> 3oaiC17ACP[c] + ACP[c] + co2[c]	(SCO0548 or (SCO2390 or SCO1266))	SCO0548 SCO2390 SCO1266	fabB2 fabF fabF2	Cell Envelope Biosynthesis	0	0	1000	0	2	2.3.1.41
3OASai70	3-oxoacyl-[acyl-carrier-protein] synthase (ante-iso-C7:0)	2mbACP[c] + h[c] + malACP[c] -> 3oaiC7ACP[c] + ACP[c] + co2[c]	(SCO0548 or (SCO2390 or SCO1266))	SCO0548 SCO2390 SCO1266	fabB2 fabF fabF2	Cell Envelope Biosynthesis	0	0	1000	0	2	2.3.1.41
3OASai90	3-oxoacyl-[acyl-carrier-protein] synthase (ante-iso-C9:0)	aiC7ACP[c] + h[c] + malACP[c] -> 3oaiC9ACP[c] + ACP[c] + co2[c]	(SCO0548 or (SCO2390 or SCO1266))	SCO0548 SCO2390 SCO1266	fabB2 fabF fabF2	Cell Envelope Biosynthesis	0	0	1000	0	2	2.3.1.41
3OASi100	3-oxoacyl-[acyl-carrier-protein] synthase (iso-C10:0)	h[c] + malACP[c] + iC8ACP[c] -> 3oiC10ACP[c] + ACP[c] + co2[c]	(SCO0548 or (SCO2390 or SCO1266))	SCO0548 SCO2390 SCO1266	fabB2 fabF fabF2	Cell Envelope Biosynthesis	0	0	1000	0	2	2.3.1.41
3OASi110	3-oxoacyl-[acyl-carrier-protein] synthase (iso-C11:0)	iC9ACP[c] + h[c] + malACP[c] -> 3oiC11ACP[c] + ACP[c] + co2[c]	(SCO0548 or (SCO2390 or SCO1266))	SCO0548 SCO2390 SCO1266	fabB2 fabF fabF2	Cell Envelope Biosynthesis	0	0	1000	0	2	2.3.1.41
3OASi120	3-oxoacyl-[acyl-carrier-protein] synthase (iso-C12:0)	iC10ACP[c] + h[c] + malACP[c] -> 3oiC12ACP[c] + ACP[c] + co2[c]	(SCO0548 or (SCO2390 or SCO1266))	SCO0548 SCO2390 SCO1266	fabB2 fabF fabF2	Cell Envelope Biosynthesis	0	0	1000	0	2	2.3.1.41
3OASi130	3-oxoacyl-[acyl-carrier-protein] synthase (iso-C13:0)	iC11ACP[c] + h[c] + malACP[c] -> 3oiC13ACP[c] + ACP[c] + co2[c]	(SCO0548 or (SCO2390 or SCO1266))	SCO0548 SCO2390 SCO1266	fabB2 fabF fabF2	Cell Envelope Biosynthesis	0	0	1000	0	2	2.3.1.41
3OASi140	3-oxoacyl-[acyl-carrier-protein] synthase (iso-C14:0)	iC12ACP[c] + h[c] + malACP[c] -> 3oiC14ACP[c] + ACP[c] + co2[c]	(SCO0548 or (SCO2390 or SCO1266))	SCO0548 SCO2390 SCO1266	fabB2 fabF fabF2	Cell Envelope Biosynthesis	0	0	1000	0	2	2.3.1.41
3OASi150	3-oxoacyl-[acyl-carrier-protein] synthase (iso-C15:0)	iC13ACP[c] + h[c] + malACP[c] -> 3oiC15ACP[c] + ACP[c] + co2[c]	(SCO0548 or (SCO2390 or SCO1266))	SCO0548 SCO2390 SCO1266	fabB2 fabF fabF2	Cell Envelope Biosynthesis	0	0	1000	0	2	2.3.1.41
3OASi160	3-oxoacyl-[acyl-carrier-protein] synthase (iso-C16:0)	h[c] + malACP[c] + iC14ACP[c] -> 3oiC16ACP[c] + ACP[c] + co2[c]	(SCO0548 or (SCO2390 or SCO1266))	SCO0548 SCO2390 SCO1266	fabB2 fabF fabF2	Cell Envelope Biosynthesis	0	0	1000	0	2	2.3.1.41
3OASi170	3-oxoacyl-[acyl-carrier-protein] synthase (iso-C17:0)	iC15ACP[c] + h[c] + malACP[c] -> 3oiC17ACP[c] + ACP[c] + co2[c]	(SCO0548 or (SCO2390 or SCO1266))	SCO0548 SCO2390 SCO1266	fabB2 fabF fabF2	Cell Envelope Biosynthesis	0	0	1000	0	2	2.3.1.41
3OASi180	3-oxoacyl-[acyl-carrier-protein] synthase (iso-C18:0)	h[c] + malACP[c] + iC16ACP[c] -> 3oiC18ACP[c] + ACP[c] + co2[c]	(SCO0548 or (SCO2390 or SCO1266))	SCO0548 SCO2390 SCO1266	fabB2 fabF fabF2	Cell Envelope Biosynthesis	0	0	1000	0	2	2.3.1.41
3OASi60	3-oxoacyl-[acyl-carrier-protein] synthase (iso-C6:0)	ibACP[c] + h[c] + malACP[c] -> 3oiC6ACP[c] + ACP[c] + co2[c]	(SCO0548 or (SCO2390 or SCO1266))	SCO0548 SCO2390 SCO1266	fabB2 fabF fabF2	Cell Envelope Biosynthesis	0	0	1000	0	2	2.3.1.41
3OASi70	3-oxoacyl-[acyl-carrier-protein] synthase (iso-C7:0)	ivACP[c] + h[c] + malACP[c] -> 3oiC7ACP[c] + ACP[c] + co2[c]	(SCO0548 or (SCO2390 or SCO1266))	SCO0548 SCO2390 SCO1266	fabB2 fabF fabF2	Cell Envelope Biosynthesis	0	0	1000	0	2	2.3.1.41
3OASi80	3-oxoacyl-[acyl-carrier-protein] synthase (iso-C8:0)	h[c] + iC6ACP[c] + malACP[c] -> 3oiC8ACP[c] + ACP[c] + co2[c]	(SCO0548 or (SCO2390 or SCO1266))	SCO0548 SCO2390 SCO1266	fabB2 fabF fabF2	Cell Envelope Biosynthesis	0	0	1000	0	2	2.3.1.41
3OASi90	3-oxoacyl-[acyl-carrier-protein] synthase (iso-C9:0)	iC7ACP[c] + h[c] + malACP[c] -> 3oiC9ACP[c] + ACP[c] + co2[c]	(SCO0548 or (SCO2390 or SCO1266))	SCO0548 SCO2390 SCO1266	fabB2 fabF fabF2	Cell Envelope Biosynthesis	0	0	1000	0	2	2.3.1.41
ALAALA	D-alanine-D-alanine ligase	2 ala-D[c] + atp[c] -> adp[c] + alaala[c] + h[c] + pi[c]	SCO5560	SCO5560	ddlA	Cell Envelope Biosynthesis	0	0	1000	0	2	6.3.2.4
ALAALAD	D-alanine-D-alanine dipeptidase	alaala[c] + h2o[c] -> 2 ala-D[c]	SCO3596	SCO3596	vanX	Cell Envelope Biosynthesis	0	0	1000	0	4	3.4.17.14		Tan AL, Loke P, Sim TS.#2002#Molecular cloning and functional characterisation of VanX, a D-alanyl-D-alanine dipeptidase from Streptomyces coelicolor A3(2).#Res Microbiol.#153#27-32#
ALALAC	D-alanine-D-lactate ligase	ala-D[c] + lac-D[c] + atp[c] -> adp[c] + alalac[c] + h[c] + pi[c]	SCO3595	SCO3595	vanA	Cell Envelope Biosynthesis	0	0	1000	0	3	6.3.2.4		Hong HJ, Hutchings MI, Neu JM, Wright GD, Paget MS, Buttner MJ.#2004#Characterization of an inducible vancomycin resistance system in Streptomyces coelicolor reveals a novel gene (vanK) required for drug resistance.#Mol Microbiol.#52#1107-1121#
EAR100x	enoyl-[acyl-carrier-protein] reductase (NADH) (n-C10:0)	h[c] + nadh[c] + tdec2eACP[c] -> dcaACP[c] + nad[c]	SCO1814	SCO1814	inhA	Cell Envelope Biosynthesis	0	0	1000	0	2	1.3.1.9
EAR100y	enoyl-[acyl-carrier-protein] reductase (NADPH) (n-C10:0)	h[c] + nadph[c] + tdec2eACP[c] -> dcaACP[c] + nadp[c]	SCO1814	SCO1814	inhA	Cell Envelope Biosynthesis	0	0	1000	0	2	1.3.1.10
EAR110x	enoyl-[acyl-carrier-protein] reductase (NADH) (n-C11:0)	h[c] + nadh[c] + tundca2eACP[c] -> undcaACP[c] + nad[c]	SCO1814	SCO1814	inhA	Cell Envelope Biosynthesis	0	0	1000	0	2	1.3.1.9
EAR110y	enoyl-[acyl-carrier-protein] reductase (NADPH) (n-C11:0)	h[c] + nadph[c] + tundca2eACP[c] -> undcaACP[c] + nadp[c]	SCO1814	SCO1814	inhA	Cell Envelope Biosynthesis	0	0	1000	0	2	1.3.1.10
EAR120x	enoyl-[acyl-carrier-protein] reductase (NADH) (n-C12:0)	h[c] + nadh[c] + tddec2eACP[c] -> ddcaACP[c] + nad[c]	SCO1814	SCO1814	inhA	Cell Envelope Biosynthesis	0	0	1000	0	2	1.3.1.9
EAR120y	enoyl-[acyl-carrier-protein] reductase (NADPH) (n-C12:0)	h[c] + nadph[c] + tddec2eACP[c] -> ddcaACP[c] + nadp[c]	SCO1814	SCO1814	inhA	Cell Envelope Biosynthesis	0	0	1000	0	2	1.3.1.10
EAR121x	enoyl-[acyl-carrier-protein] reductase (NADH) (n-C12:1)	h[c] + nadh[c] + t3c5ddeceACP[c] -> cddec5eACP[c] + nad[c]	SCO1814	SCO1814	inhA	Cell Envelope Biosynthesis	0	0	1000	0	2	1.3.1.9
EAR121y	enoyl-[acyl-carrier-protein] reductase (NADPH) (n-C12:1)	h[c] + nadph[c] + t3c5ddeceACP[c] -> cddec5eACP[c] + nadp[c]	SCO1814	SCO1814	inhA	Cell Envelope Biosynthesis	0	0	1000	0	2	1.3.1.10
EAR130x	enoyl-[acyl-carrier-protein] reductase (NADH) (n-C13:0)	h[c] + nadh[c] + ttridca2eACP[c] -> tridcaACP[c] + nad[c]	SCO1814	SCO1814	inhA	Cell Envelope Biosynthesis	0	0	1000	0	2	1.3.1.9
EAR130y	enoyl-[acyl-carrier-protein] reductase (NADPH) (n-C13:0)	h[c] + nadph[c] + ttridca2eACP[c] -> tridcaACP[c] + nadp[c]	SCO1814	SCO1814	inhA	Cell Envelope Biosynthesis	0	0	1000	0	2	1.3.1.10
EAR140x	enoyl-[acyl-carrier-protein] reductase (NADH) (n-C14:0)	h[c] + nadh[c] + tmrs2eACP[c] -> myrsACP[c] + nad[c]	SCO1814	SCO1814	inhA	Cell Envelope Biosynthesis	0	0	1000	0	2	1.3.1.9
EAR140y	enoyl-[acyl-carrier-protein] reductase (NADPH) (n-C14:0)	h[c] + nadph[c] + tmrs2eACP[c] -> myrsACP[c] + nadp[c]	SCO1814	SCO1814	inhA	Cell Envelope Biosynthesis	0	0	1000	0	2	1.3.1.10
EAR141x	enoyl-[acyl-carrier-protein] reductase (NADH) (n-C14:1)	h[c] + nadh[c] + t3c7mrseACP[c] -> nad[c] + tdeACP[c]	SCO1814	SCO1814	inhA	Cell Envelope Biosynthesis	0	0	1000	0	2	1.3.1.9
EAR141y	enoyl-[acyl-carrier-protein] reductase (NADPH) (n-C14:1)	h[c] + nadph[c] + t3c7mrseACP[c] -> nadp[c] + tdeACP[c]	SCO1814	SCO1814	inhA	Cell Envelope Biosynthesis	0	0	1000	0	2	1.3.1.10
EAR150x	enoyl-[acyl-carrier-protein] reductase (NADH) (n-C15:0)	h[c] + nadh[c] + tptdca2eACP[c] -> ptdcaACP[c] + nad[c]	SCO1814	SCO1814	inhA	Cell Envelope Biosynthesis	0	0	1000	0	2	1.3.1.9
EAR150y	enoyl-[acyl-carrier-protein] reductase (NADPH) (n-C15:0)	h[c] + nadph[c] + tptdca2eACP[c] -> ptdcaACP[c] + nadp[c]	SCO1814	SCO1814	inhA	Cell Envelope Biosynthesis	0	0	1000	0	2	1.3.1.10
EAR160x	enoyl-[acyl-carrier-protein] reductase (NADH) (n-C16:0)	h[c] + nadh[c] + tpalm2eACP[c] -> nad[c] + palmACP[c]	SCO1814	SCO1814	inhA	Cell Envelope Biosynthesis	0	0	1000	0	2	1.3.1.9
EAR160y	enoyl-[acyl-carrier-protein] reductase (NADPH) (n-C16:0)	h[c] + nadph[c] + tpalm2eACP[c] -> nadp[c] + palmACP[c]	SCO1814	SCO1814	inhA	Cell Envelope Biosynthesis	0	0	1000	0	2	1.3.1.10
EAR161x	enoyl-[acyl-carrier-protein] reductase (NADH) (n-C16:1)	h[c] + nadh[c] + t3c9palmeACP[c] -> hdeACP[c] + nad[c]	SCO1814	SCO1814	inhA	Cell Envelope Biosynthesis	0	0	1000	0	2	1.3.1.9
EAR161y	enoyl-[acyl-carrier-protein] reductase (NADPH) (n-C16:1)	h[c] + nadph[c] + t3c9palmeACP[c] -> hdeACP[c] + nadp[c]	SCO1814	SCO1814	inhA	Cell Envelope Biosynthesis	0	0	1000	0	2	1.3.1.10
EAR170x	enoyl-[acyl-carrier-protein] reductase (NADH) (n-C17:0)	h[c] + nadh[c] + thepdca2eACP[c] -> hepdcaACP[c] + nad[c]	SCO1814	SCO1814	inhA	Cell Envelope Biosynthesis	0	0	1000	0	2	1.3.1.9
EAR170y	enoyl-[acyl-carrier-protein] reductase (NADPH) (n-C17:0)	h[c] + nadph[c] + thepdca2eACP[c] -> hepdcaACP[c] + nadp[c]	SCO1814	SCO1814	inhA	Cell Envelope Biosynthesis	0	0	1000	0	2	1.3.1.10
EAR180x	enoyl-[acyl-carrier-protein] reductase (NADH) (n-C18:0)	h[c] + nadh[c] + toctd2eACP[c] -> nad[c] + ocdcaACP[c]	SCO1814	SCO1814	inhA	Cell Envelope Biosynthesis	0	0	1000	0	2	1.3.1.9
EAR180y	enoyl-[acyl-carrier-protein] reductase (NADPH) (n-C18:0)	h[c] + nadph[c] + toctd2eACP[c] -> nadp[c] + ocdcaACP[c]	SCO1814	SCO1814	inhA	Cell Envelope Biosynthesis	0	0	1000	0	2	1.3.1.10
EAR181x	enoyl-[acyl-carrier-protein] reductase (NADH) (n-C18:1)	h[c] + nadh[c] + t3c11vaceACP[c] -> nad[c] + octeACP[c]	SCO1814	SCO1814	inhA	Cell Envelope Biosynthesis	0	0	1000	0	2	1.3.1.9
EAR181y	enoyl-[acyl-carrier-protein] reductase (NADPH) (n-C18:1)	h[c] + nadph[c] + t3c11vaceACP[c] -> nadp[c] + octeACP[c]	SCO1814	SCO1814	inhA	Cell Envelope Biosynthesis	0	0	1000	0	2	1.3.1.10
EAR40x	enoyl-[acyl-carrier-protein] reductase (NADH) (n-C4:0)	but2eACP[c] + h[c] + nadh[c] -> butACP[c] + nad[c]	SCO1814	SCO1814	inhA	Cell Envelope Biosynthesis	0	0	1000	0	2	1.3.1.9
EAR40y	enoyl-[acyl-carrier-protein] reductase (NADPH) (n-C4:0)	but2eACP[c] + h[c] + nadph[c] -> butACP[c] + nadp[c]	SCO1814	SCO1814	inhA	Cell Envelope Biosynthesis	0	0	1000	0	2	1.3.1.10
EAR50x	enoyl-[acyl-carrier-protein] reductase (NADH) (n-C5:0)	h[c] + nadh[c] + tptn2eACP[c] -> ptnACP[c] + nad[c]	SCO1814	SCO1814	inhA	Cell Envelope Biosynthesis	0	0	1000	0	2	1.3.1.9
EAR50y	enoyl-[acyl-carrier-protein] reductase (NADPH) (n-C5:0)	h[c] + nadph[c] + tptn2eACP[c] -> ptnACP[c] + nadp[c]	SCO1814	SCO1814	inhA	Cell Envelope Biosynthesis	0	0	1000	0	2	1.3.1.10
EAR60x	enoyl-[acyl-carrier-protein] reductase (NADH) (n-C6:0)	h[c] + nadh[c] + thex2eACP[c] -> hexACP[c] + nad[c]	SCO1814	SCO1814	inhA	Cell Envelope Biosynthesis	0	0	1000	0	2	1.3.1.9
EAR60y	enoyl-[acyl-carrier-protein] reductase (NADPH) (n-C6:0)	h[c] + nadph[c] + thex2eACP[c] -> hexACP[c] + nadp[c]	SCO1814	SCO1814	inhA	Cell Envelope Biosynthesis	0	0	1000	0	2	1.3.1.10
EAR70x	enoyl-[acyl-carrier-protein] reductase (NADH) (n-C7:0)	h[c] + nadh[c] + thep2eACP[c] -> hepACP[c] + nad[c]	SCO1814	SCO1814	inhA	Cell Envelope Biosynthesis	0	0	1000	0	2	1.3.1.9
EAR70y	enoyl-[acyl-carrier-protein] reductase (NADPH) (n-C7:0)	h[c] + nadph[c] + thep2eACP[c] -> hepACP[c] + nadp[c]	SCO1814	SCO1814	inhA	Cell Envelope Biosynthesis	0	0	1000	0	2	1.3.1.10
EAR80x	enoyl-[acyl-carrier-protein] reductase (NADH) (n-C8:0)	h[c] + nadh[c] + toct2eACP[c] -> nad[c] + ocACP[c]	SCO1814	SCO1814	inhA	Cell Envelope Biosynthesis	0	0	1000	0	2	1.3.1.9
EAR80y	enoyl-[acyl-carrier-protein] reductase (NADPH) (n-C8:0)	h[c] + nadph[c] + toct2eACP[c] -> nadp[c] + ocACP[c]	SCO1814	SCO1814	inhA	Cell Envelope Biosynthesis	0	0	1000	0	2	1.3.1.10
EAR90x	enoyl-[acyl-carrier-protein] reductase (NADH) (n-C9:0)	h[c] + nadh[c] + tnon2eACP[c] -> nonACP[c] + nad[c]	SCO1814	SCO1814	inhA	Cell Envelope Biosynthesis	0	0	1000	0	2	1.3.1.9
EAR90y	enoyl-[acyl-carrier-protein] reductase (NADPH) (n-C9:0)	h[c] + nadph[c] + tnon2eACP[c] -> nonACP[c] + nadp[c]	SCO1814	SCO1814	inhA	Cell Envelope Biosynthesis	0	0	1000	0	2	1.3.1.10
EARai110x	enoyl-[acyl-carrier-protein] reductase (NADH) (ante-iso-C11:0)	h[c] + nadh[c] + taiC112eACP[c] -> aiC11ACP[c] + nad[c]	SCO1814	SCO1814	inhA	Cell Envelope Biosynthesis	0	0	1000	0	2	1.3.1.9
EARai110y	enoyl-[acyl-carrier-protein] reductase (NADPH) (ante-iso-C11:0)	h[c] + nadph[c] + taiC112eACP[c] -> aiC11ACP[c] + nadp[c]	SCO1814	SCO1814	inhA	Cell Envelope Biosynthesis	0	0	1000	0	2	1.3.1.10
EARai130x	enoyl-[acyl-carrier-protein] reductase (NADH) (ante-iso-C13:0)	h[c] + nadh[c] + taiC132eACP[c] -> aiC13ACP[c] + nad[c]	SCO1814	SCO1814	inhA	Cell Envelope Biosynthesis	0	0	1000	0	2	1.3.1.9
EARai130y	enoyl-[acyl-carrier-protein] reductase (NADPH) (ante-iso-C13:0)	h[c] + nadph[c] + taiC132eACP[c] -> aiC13ACP[c] + nadp[c]	SCO1814	SCO1814	inhA	Cell Envelope Biosynthesis	0	0	1000	0	2	1.3.1.10
EARai150x	enoyl-[acyl-carrier-protein] reductase (NADH) (ante-iso-C15:0)	h[c] + nadh[c] + taiC152eACP[c] -> aiC15ACP[c] + nad[c]	SCO1814	SCO1814	inhA	Cell Envelope Biosynthesis	0	0	1000	0	2	1.3.1.9
EARai150y	enoyl-[acyl-carrier-protein] reductase (NADPH) (ante-iso-C15:0)	h[c] + nadph[c] + taiC152eACP[c] -> aiC15ACP[c] + nadp[c]	SCO1814	SCO1814	inhA	Cell Envelope Biosynthesis	0	0	1000	0	2	1.3.1.10
EARai170x	enoyl-[acyl-carrier-protein] reductase (NADH) (ante-iso-C17:0)	h[c] + nadh[c] + taiC172eACP[c] -> aiC17ACP[c] + nad[c]	SCO1814	SCO1814	inhA	Cell Envelope Biosynthesis	0	0	1000	0	2	1.3.1.9
EARai170y	enoyl-[acyl-carrier-protein] reductase (NADPH) (ante-iso-C17:0)	h[c] + nadph[c] + taiC172eACP[c] -> aiC17ACP[c] + nadp[c]	SCO1814	SCO1814	inhA	Cell Envelope Biosynthesis	0	0	1000	0	2	1.3.1.10
EARai70x	enoyl-[acyl-carrier-protein] reductase (NADH) (ante-iso-C7:0)	h[c] + nadh[c] + taiC72eACP[c] -> aiC7ACP[c] + nad[c]	SCO1814	SCO1814	inhA	Cell Envelope Biosynthesis	0	0	1000	0	2	1.3.1.9
EARai70y	enoyl-[acyl-carrier-protein] reductase (NADPH) (ante-iso-C7:0)	h[c] + nadph[c] + taiC72eACP[c] -> aiC7ACP[c] + nadp[c]	SCO1814	SCO1814	inhA	Cell Envelope Biosynthesis	0	0	1000	0	2	1.3.1.10
EARai90x	enoyl-[acyl-carrier-protein] reductase (NADH) (ante-iso-C9:0)	h[c] + nadh[c] + taiC92eACP[c] -> aiC9ACP[c] + nad[c]	SCO1814	SCO1814	inhA	Cell Envelope Biosynthesis	0	0	1000	0	2	1.3.1.9
EARai90y	enoyl-[acyl-carrier-protein] reductase (NADPH) (ante-iso-C9:0)	h[c] + nadph[c] + taiC92eACP[c] -> aiC9ACP[c] + nadp[c]	SCO1814	SCO1814	inhA	Cell Envelope Biosynthesis	0	0	1000	0	2	1.3.1.10
EARi100x	enoyl-[acyl-carrier-protein] reductase (NADH) (iso-C10:0)	h[c] + nadh[c] + tiC102eACP[c] -> iC10ACP[c] + nad[c]	SCO1814	SCO1814	inhA	Cell Envelope Biosynthesis	0	0	1000	0	2	1.3.1.9
EARi100y	enoyl-[acyl-carrier-protein] reductase (NADPH) (iso-C10:0)	h[c] + nadph[c] + tiC102eACP[c] -> iC10ACP[c] + nadp[c]	SCO1814	SCO1814	inhA	Cell Envelope Biosynthesis	0	0	1000	0	2	1.3.1.10
EARi110x	enoyl-[acyl-carrier-protein] reductase (NADH) (iso-C11:0)	h[c] + nadh[c] + tiC112eACP[c] -> iC11ACP[c] + nad[c]	SCO1814	SCO1814	inhA	Cell Envelope Biosynthesis	0	0	1000	0	2	1.3.1.9
EARi110y	enoyl-[acyl-carrier-protein] reductase (NADPH) (iso-C11:0)	h[c] + nadph[c] + tiC112eACP[c] -> iC11ACP[c] + nadp[c]	SCO1814	SCO1814	inhA	Cell Envelope Biosynthesis	0	0	1000	0	2	1.3.1.10
EARi120x	enoyl-[acyl-carrier-protein] reductase (NADH) (iso-C12:0)	h[c] + nadh[c] + tiC122eACP[c] -> iC12ACP[c] + nad[c]	SCO1814	SCO1814	inhA	Cell Envelope Biosynthesis	0	0	1000	0	2	1.3.1.9
EARi120y	enoyl-[acyl-carrier-protein] reductase (NADPH) (iso-C12:0)	h[c] + nadph[c] + tiC122eACP[c] -> iC12ACP[c] + nadp[c]	SCO1814	SCO1814	inhA	Cell Envelope Biosynthesis	0	0	1000	0	2	1.3.1.10
EARi130x	enoyl-[acyl-carrier-protein] reductase (NADH) (iso-C13:0)	h[c] + nadh[c] + tiC132eACP[c] -> iC13ACP[c] + nad[c]	SCO1814	SCO1814	inhA	Cell Envelope Biosynthesis	0	0	1000	0	2	1.3.1.9
EARi130y	enoyl-[acyl-carrier-protein] reductase (NADPH) (iso-C13:0)	h[c] + nadph[c] + tiC132eACP[c] -> iC13ACP[c] + nadp[c]	SCO1814	SCO1814	inhA	Cell Envelope Biosynthesis	0	0	1000	0	2	1.3.1.10
EARi140x	enoyl-[acyl-carrier-protein] reductase (NADH) (iso-C14:0)	h[c] + nadh[c] + tiC142eACP[c] -> iC14ACP[c] + nad[c]	SCO1814	SCO1814	inhA	Cell Envelope Biosynthesis	0	0	1000	0	2	1.3.1.9
EARi140y	enoyl-[acyl-carrier-protein] reductase (NADPH) (iso-C14:0)	h[c] + nadph[c] + tiC142eACP[c] -> iC14ACP[c] + nadp[c]	SCO1814	SCO1814	inhA	Cell Envelope Biosynthesis	0	0	1000	0	2	1.3.1.10
EARi150x	enoyl-[acyl-carrier-protein] reductase (NADH) (iso-C15:0)	h[c] + nadh[c] + tiC152eACP[c] -> iC15ACP[c] + nad[c]	SCO1814	SCO1814	inhA	Cell Envelope Biosynthesis	0	0	1000	0	2	1.3.1.9
EARi150y	enoyl-[acyl-carrier-protein] reductase (NADPH) (iso-C15:0)	h[c] + nadph[c] + tiC152eACP[c] -> iC15ACP[c] + nadp[c]	SCO1814	SCO1814	inhA	Cell Envelope Biosynthesis	0	0	1000	0	2	1.3.1.10
EARi160x	enoyl-[acyl-carrier-protein] reductase (NADH) (iso-C16:0)	h[c] + nadh[c] + tiC162eACP[c] -> nad[c] + iC16ACP[c]	SCO1814	SCO1814	inhA	Cell Envelope Biosynthesis	0	0	1000	0	2	1.3.1.9
EARi160y	enoyl-[acyl-carrier-protein] reductase (NADPH) (iso-C16:0)	h[c] + nadph[c] + tiC162eACP[c] -> nadp[c] + iC16ACP[c]	SCO1814	SCO1814	inhA	Cell Envelope Biosynthesis	0	0	1000	0	2	1.3.1.10
EARi170x	enoyl-[acyl-carrier-protein] reductase (NADH) (iso-C17:0)	h[c] + nadh[c] + tiC172eACP[c] -> iC17ACP[c] + nad[c]	SCO1814	SCO1814	inhA	Cell Envelope Biosynthesis	0	0	1000	0	2	1.3.1.9
EARi170y	enoyl-[acyl-carrier-protein] reductase (NADPH) (iso-C17:0)	h[c] + nadph[c] + tiC172eACP[c] -> iC17ACP[c] + nadp[c]	SCO1814	SCO1814	inhA	Cell Envelope Biosynthesis	0	0	1000	0	2	1.3.1.10
EARi180x	enoyl-[acyl-carrier-protein] reductase (NADH) (iso-C18:0)	h[c] + nadh[c] + tiC182eACP[c] -> nad[c] + iC18ACP[c]	SCO1814	SCO1814	inhA	Cell Envelope Biosynthesis	0	0	1000	0	2	1.3.1.9
EARi180y	enoyl-[acyl-carrier-protein] reductase (NADPH) (iso-C18:0)	h[c] + nadph[c] + tiC182eACP[c] -> nadp[c] + iC18ACP[c]	SCO1814	SCO1814	inhA	Cell Envelope Biosynthesis	0	0	1000	0	2	1.3.1.10
EARi60x	enoyl-[acyl-carrier-protein] reductase (NADH) (iso-C6:0)	h[c] + nadh[c] + tiC62eACP[c] -> iC6ACP[c] + nad[c]	SCO1814	SCO1814	inhA	Cell Envelope Biosynthesis	0	0	1000	0	2	1.3.1.9
EARi60y	enoyl-[acyl-carrier-protein] reductase (NADPH) (iso-C6:0)	h[c] + nadph[c] + tiC62eACP[c] -> iC6ACP[c] + nadp[c]	SCO1814	SCO1814	inhA	Cell Envelope Biosynthesis	0	0	1000	0	2	1.3.1.10
EARi70x	enoyl-[acyl-carrier-protein] reductase (NADH) (iso-C7:0)	h[c] + nadh[c] + tiC72eACP[c] -> iC7ACP[c] + nad[c]	SCO1814	SCO1814	inhA	Cell Envelope Biosynthesis	0	0	1000	0	2	1.3.1.9
EARi70y	enoyl-[acyl-carrier-protein] reductase (NADPH) (iso-C7:0)	h[c] + nadph[c] + tiC72eACP[c] -> iC7ACP[c] + nadp[c]	SCO1814	SCO1814	inhA	Cell Envelope Biosynthesis	0	0	1000	0	2	1.3.1.10
EARi80x	enoyl-[acyl-carrier-protein] reductase (NADH) (iso-C8:0)	h[c] + nadh[c] + tiC82eACP[c] -> nad[c] + iC8ACP[c]	SCO1814	SCO1814	inhA	Cell Envelope Biosynthesis	0	0	1000	0	2	1.3.1.9
EARi80y	enoyl-[acyl-carrier-protein] reductase (NADPH) (iso-C8:0)	h[c] + nadph[c] + tiC82eACP[c] -> nadp[c] + iC8ACP[c]	SCO1814	SCO1814	inhA	Cell Envelope Biosynthesis	0	0	1000	0	2	1.3.1.10
EARi90x	enoyl-[acyl-carrier-protein] reductase (NADH) (iso-C9:0)	h[c] + nadh[c] + tiC92eACP[c] -> iC9ACP[c] + nad[c]	SCO1814	SCO1814	inhA	Cell Envelope Biosynthesis	0	0	1000	0	2	1.3.1.9
EARi90y	enoyl-[acyl-carrier-protein] reductase (NADPH) (iso-C9:0)	h[c] + nadph[c] + tiC92eACP[c] -> iC9ACP[c] + nadp[c]	SCO1814	SCO1814	inhA	Cell Envelope Biosynthesis	0	0	1000	0	2	1.3.1.10
ETHAAL	Ethanolamine ammonia-lyase	etha[c] -> acald[c] + nh4[c]				Cell Envelope Biosynthesis	0	0	1000	0	1	4.3.1.7	Required for growth using ethanolamine as a carbon source
FACOAE100	fatty-acid-CoA thioesterase (decanoate)	dcacoa[c] + h2o[c] -> coa[c] + dca[c] + h[c]	(SCO1153 or SCO2773)	SCO1153 SCO2773	tesB tesB2	Cell Envelope Biosynthesis	0	0	1000	0	2
FACOAE120	fatty-acid-CoA thioesterase (dodecanoate)	ddcacoa[c] + h2o[c] -> coa[c] + ddca[c] + h[c]	(SCO1153 or SCO2773)	SCO1153 SCO2773	tesB tesB2	Cell Envelope Biosynthesis	0	0	1000	0	2
FACOAE140	fatty-acid-CoA thioesterase (tetradecanoate)	h2o[c] + tdcoa[c] -> coa[c] + h[c] + ttdca[c]	(SCO1153 or SCO2773)	SCO1153 SCO2773	tesB tesB2	Cell Envelope Biosynthesis	0	0	1000	0	2
FACOAE141	fatty-acid-CoA thioesterase (tetradecenoate)	h2o[c] + tdecoa[c] -> coa[c] + h[c] + ttdcea[c]	(SCO1153 or SCO2773)	SCO1153 SCO2773	tesB tesB2	Cell Envelope Biosynthesis	0	0	1000	0	2
FACOAE160	fatty-acid-CoA thioesterase (hexadecanoate)	h2o[c] + pmtcoa[c] -> coa[c] + h[c] + hdca[c]	(SCO1153 or SCO2773)	SCO1153 SCO2773	tesB tesB2	Cell Envelope Biosynthesis	0	0	1000	0	2
FACOAE161	fatty-acid-CoA thioesterase (hexadecenoate)	h2o[c] + hdcoa[c] -> coa[c] + h[c] + hdcea[c]	(SCO1153 or SCO2773)	SCO1153 SCO2773	tesB tesB2	Cell Envelope Biosynthesis	0	0	1000	0	2
FACOAE180	fatty-acid-CoA thioesterase (octadecanoate)	h2o[c] + stcoa[c] -> coa[c] + h[c] + ocdca[c]	(SCO1153 or SCO2773)	SCO1153 SCO2773	tesB tesB2	Cell Envelope Biosynthesis	0	0	1000	0	2
FACOAE181	fatty-acid-CoA thioesterase (octadecenoate)	h2o[c] + odecoa[c] -> coa[c] + h[c] + ocdcea[c]	(SCO1153 or SCO2773)	SCO1153 SCO2773	tesB tesB2	Cell Envelope Biosynthesis	0	0	1000	0	2
FACOAE60	fatty-acid-CoA thioesterase (hexanoate)	h2o[c] + hxcoa[c] -> coa[c] + h[c] + hxa[c]	(SCO1153 or SCO2773)	SCO1153 SCO2773	tesB tesB2	Cell Envelope Biosynthesis	0	0	1000	0	2
FACOAE80	fatty-acid-CoA thioesterase (octanoate)	h2o[c] + occoa[c] -> coa[c] + h[c] + octa[c]	(SCO1153 or SCO2773)	SCO1153 SCO2773	tesB tesB2	Cell Envelope Biosynthesis	0	0	1000	0	2
G1PACT	glucosamine-1-phosphate N-acetyltransferase	accoa[c] + gam1p[c] -> acgam1p[c] + coa[c] + h[c]	SCO3122	SCO3122		Cell Envelope Biosynthesis	0	0	1000	0	2	2.3.1.157
GALUi	UTP-glucose-1-phosphate uridylyltransferase (irreversible)	g1p[c] + h[c] + utp[c] -> ppi[c] + udpg[c]	SCO3182	SCO3182	gtaB	Cell Envelope Biosynthesis	0	0	1000	0	2	2.7.7.9
GDPMNP	GDP-mannose phyrophosphatase	gdpmann[c] + h2o[c] -> gmp[c] + 2 h[c] + man1p[c]	SCO0280	SCO0280		Cell Envelope Biosynthesis	0	0	1000	0	2
GF6PTA	glutamine-fructose-6-phosphate transaminase	f6p[c] + gln-L[c] -> gam6p[c] + glu-L[c]	(SCO2789 or SCO4740)	SCO2789 SCO4740	glmS2 glmS1	Cell Envelope Biosynthesis	0	0	1000	0	2	2.6.1.16
GLUR	glutamate racemase	glu-D[c] <=> glu-L[c]	SCO1018	SCO1018		Cell Envelope Biosynthesis	1	-1000	1000	0	2	5.1.1.3
MAN1PT	mannose-1-phosphate guanylyltransferase	gtp[c] + h[c] + man1p[c] -> gdpmann[c] + ppi[c]	(SCO1388 or SCO3039)	SCO1388 SCO3039		Cell Envelope Biosynthesis	0	0	1000	0	2	2.7.7.13
MI1PP	myo-inositol 1-phosphatase	h2o[c] + mi1p-D[c] -> inost[c] + pi[c]	SCO5860	SCO5860	suhB	Cell Envelope Biosynthesis	0	0	1000	0	2	3.1.3.25
PAPPT3	phospho-N-acetylmuramoyl-pentapeptide-transferase (meso-2,6-diaminopimelate)	udcpp[c] + ugmda[c] -> uagmda[c] + ump[c]	SCO2087	SCO2087	murX	Cell Envelope Biosynthesis	0	0	1000	0	2	2.7.8.13
PGAMT	phosphoglucosamine mutase	gam1p[c] <=> gam6p[c]	SCO4736	SCO4736		Cell Envelope Biosynthesis	1	-1000	1000	0	2	5.4.2.10
T2DECAI	trans-2-decenoyl-ACP isomerase	tdec2eACP[c] <=> cdec3eACP[c]				Cell Envelope Biosynthesis	1	-1000	1000	0	1		Required for growth (fatty acid biosynthesis)
TDPDRE	dTDP-4-dehydrorhamnose 3,5-epimerase	dtdp4d6dg[c] -> dtdp4d6dm[c]	SCO0400	SCO0400		Cell Envelope Biosynthesis	0	0	1000	0	2	5.1.3.13
TDPDRR	dTDP-4-dehydrorhamnose reductase	dtdp4d6dm[c] + h[c] + nadph[c] -> dtdprmn[c] + nadp[c]	SCO7194	SCO7194		Cell Envelope Biosynthesis	0	0	1000	0	2	1.1.1.133
TDPGDH	dTDPglucose 4,6-dehydratase	dtdpglu[c] -> dtdp4d6dg[c] + h2o[c]	(SCO0749 or SCO6179)	SCO0749 SCO6179	cwgA	Cell Envelope Biosynthesis	0	0	1000	0	2	4.2.1.46
UAAGDS	UDP-N-acetylmuramoyl-L-alanyl-D-glutamyl-meso-2,6-diaminopimelate synthetase	26dap-M[c] + atp[c] + uamag[c] -> adp[c] + h[c] + pi[c] + ugmd[c]	SCO2089	SCO2089	murE	Cell Envelope Biosynthesis	0	0	1000	0	2	6.3.2.13
UACMAMO	UDP-N-acetyl-D-mannosamine oxidoreductase	h2o[c] + 2 nad[c] + uacmam[c] -> 3 h[c] + 2 nadh[c] + uacmamu[c]	(SCO4773 or SCO5050)	SCO4773 SCO5050		Cell Envelope Biosynthesis	0	0	1000	0	2
UAG2E	UDP-N-acetylglucosamine 2-epimerase	uacgam[c] <=> uacmam[c]				Cell Envelope Biosynthesis	1	-1000	1000	0	1	5.1.3.14	Required for growth (teichoic acid biosynthesis)
UAGCVT	UDP-N-acetylglucosamine 1-carboxyvinyltransferase	pep[c] + uacgam[c] -> pi[c] + uaccg[c]	(SCO2949 or SCO5998)	SCO2949 SCO5998	murA murA2	Cell Envelope Biosynthesis	0	0	1000	0	2	2.5.1.7
UAGDP	UDP-N-acetylglucosamine diphosphorylase	acgam1p[c] + h[c] + utp[c] -> ppi[c] + uacgam[c]	SCO3122	SCO3122		Cell Envelope Biosynthesis	0	0	1000	0	2	2.7.7.23
UAGPT3	UDP-N-acetylglucosamine-N-acetylmuramyl-(pentapeptide)pyrophosphoryl-undecaprenol N-acetylglucosamine transferase	uacgam[c] + uagmda[c] -> h[c] + uaagmda[c] + udp[c]	SCO2084	SCO2084	murG	Cell Envelope Biosynthesis	0	0	1000	0	2
UAMAGS	UDP-N-acetylmuramoyl-L-alanyl-D-glutamate synthetase	atp[c] + glu-D[c] + uama[c] -> adp[c] + h[c] + pi[c] + uamag[c]	SCO2086	SCO2086	murD	Cell Envelope Biosynthesis	0	0	1000	0	2	6.3.2.9
UAMAS	UDP-N-acetylmuramoyl-L-alanine synthetase	ala-L[c] + atp[c] + uamr[c] -> adp[c] + h[c] + pi[c] + uama[c]	SCO6060	SCO6060	murC	Cell Envelope Biosynthesis	0	0	1000	0	2	6.3.2.8
UAPGR	UDP-N-acetylenolpyruvoylglucosamine reductase	h[c] + nadph[c] + uaccg[c] -> nadp[c] + uamr[c]	SCO4643	SCO4643	murB	Cell Envelope Biosynthesis	0	0	1000	0	2	1.1.1.158
UDCPDP	undecaprenyl-diphosphatase	h2o[c] + udcpdp[c] -> h[c] + pi[c] + udcpp[c]	(SCO1326 or SCO7047)	SCO1326 SCO7047		Cell Envelope Biosynthesis	0	0	1000	0	2	3.6.1.27
UDPGD	UDPglucose 6-dehydrogenase	h2o[c] + 2 nad[c] + udpg[c] -> 3 h[c] + 2 nadh[c] + udpglcur[c]	SCO3052	SCO3052		Cell Envelope Biosynthesis	0	0	1000	0	2	1.1.1.22
UGMDDS	UDP-N-acetylmuramoyl-L-alanyl-D-glutamyl-meso-2,6-diaminopimeloyl-D-alanyl-D-alanine synthetase	alaala[c] + atp[c] + ugmd[c] -> adp[c] + h[c] + pi[c] + ugmda[c]	SCO2088	SCO2088	murF	Cell Envelope Biosynthesis	0	0	1000	0	2	6.3.2.15
ACONTa	aconitase (half-reaction A, Citrate hydro-lyase)	cit[c] <=> acon-C[c] + h2o[c]	SCO5999	SCO5999	sacA	Citric Acid Cycle	1	-1000	1000	0	4	4.2.1.3		Viollier PH, Nguyen KT, Minas W, Folcher M, Dale GE, Thompson CJ.#2001#Roles of aconitase in growth, metabolism, and morphological differentiation of Streptomyces coelicolor.#J Bacteriol.#183#3193-3203#
ACONTb	aconitase (half-reaction B, Isocitrate hydro-lyase)	acon-C[c] + h2o[c] <=> icit[c]	SCO5999	SCO5999	sacA	Citric Acid Cycle	1	-1000	1000	0	4	4.2.1.3		Viollier PH, Nguyen KT, Minas W, Folcher M, Dale GE, Thompson CJ.#2001#Roles of aconitase in growth, metabolism, and morphological differentiation of Streptomyces coelicolor.#J Bacteriol.#183#3193-3203#
AKGDH	2-Oxogluterate dehydrogenase	akg[c] + coa[c] + nad[c] -> co2[c] + nadh[c] + succoa[c]	(SCO5281 and (SCO2181 or SCO7123) and (SCO0884 or SCO2180 or SCO4919))	SCO5281 SCO2181 SCO7123 SCO0884 SCO2180 SCO4919	kgd sucB udrA pdhL	Citric Acid Cycle	0	0	1000	0	2
AKGDH2	2-Oxogluterate dehydrogenase (NADP via ferredoxin)	akg[c] + coa[c] + nadp[c] -> co2[c] + nadph[c] + succoa[c]	(((SCO4594 and SCO4595) or (SCO6269 and SCO6270)) and SCO0681)	SCO4594 SCO4595 SCO6269 SCO6270 SCO0681		Citric Acid Cycle	0	0	1000	0	2
CITL	Citrate lyase	cit[c] -> ac[c] + oaa[c]	(SCO2033 or SCO6471)	SCO2033 SCO6471		Citric Acid Cycle	0	0	1000	0	2	4.1.3.6
CS	citrate synthase	accoa[c] + h2o[c] + oaa[c] -> cit[c] + coa[c] + h[c]	(SCO2736 or SCO4388 or SCO5832)	SCO2736 SCO4388 SCO5832	citA	Citric Acid Cycle	0	0	1000	0	4	2.3.3.1		Viollier PH, Minas W, Dale GE, Folcher M, Thompson CJ.#2001#Role of acid metabolism in Streptomyces coelicolor morphological differentiation and antibiotic biosynthesis.#J Bacteriol.#183#3184-3192#
FUM	fumarase	fum[c] + h2o[c] <=> mal-L[c]	(SCO5042 or SCO5044)	SCO5042 SCO5044	fumC fumB	Citric Acid Cycle	1	-1000	1000	0	2	4.2.1.2
ICDHyr	isocitrate dehydrogenase (NADP)	icit[c] + nadp[c] <=> akg[c] + co2[c] + nadph[c]	SCO7000	SCO7000	idh	Citric Acid Cycle	1	-1000	1000	0	2	1.1.1.42		$Streptomyces lividans#Zhang B, Wang B, Wang P, Cao Z, Huang E, Hao J, Dean AM, Zhu G.#2009#Enzymatic characterization of a monomeric isocitrate dehydrogenase from Streptomyces lividans TK54.#Biochimie.#91#1405-1410#
MDH	malate dehydrogenase	mal-L[c] + nad[c] <=> h[c] + nadh[c] + oaa[c]	SCO4827	SCO4827	mdh	Citric Acid Cycle	1	-1000	1000	0	2	1.1.1.37		$Streptomyces avermitilis#Wang ZD, Wang BJ, Ge YD, Pan W, Wang J, Xu L, Liu AM, Zhu GP.#2011#Expression and identification of a thermostable malate dehydrogenase from multicellular prokaryote Streptomyces avermitilis MA-4680.#Mol Biol Rep.#38#1926-1936#
SUCOAS	succinyl-CoA synthetase (ADP-forming)	atp[c] + coa[c] + succ[c] <=> adp[c] + pi[c] + succoa[c]	((SCO4808 and SCO4809) or (SCO6585 and SCO6586))	SCO4808 SCO4809 SCO6585 SCO6586	sucC sucD	Citric Acid Cycle	1	-1000	1000	0	2	6.2.1.5
4HTHRS	4-Hydroxy-L-threonine synthase	h2o[c] + phthr[c] -> 4hthr[c] + pi[c]	(SCO4293 or SCO5355)	SCO4293 SCO5355	thrC	Cofactor and Prosthetic Group Biosynthesis	0	0	1000	0	2
5DOAN	5'-deoxyadenosine nuclosidase	dad-5[c] + h2o[c] -> 5drib[c] + ade[c]				Cofactor and Prosthetic Group Biosynthesis	0	0	1000	0	1		Required for growth (biotin biosynthesis)
ACBIPGT	Adenosyl cobinamide phosphate guanyltransferase	adocbip[c] + gtp[c] + h[c] -> agdpcbi[c] + ppi[c]	SCO2173	SCO2173		Cofactor and Prosthetic Group Biosynthesis	0	0	1000	0	2
ACPpds	acyl-carrier-protein phosphodiesterase	ACP[c] + h2o[c] -> apoACP[c] + h[c] + pan4p[c]	SCO0046	SCO0046		Cofactor and Prosthetic Group Biosynthesis	0	0	1000	0	2	3.1.4.14
ACPpdsact	acyl-carrier-protein phosphodiesterase (actinorhodin)	ACPact[c] + h2o[c] -> apoACPact[c] + h[c] + pan4p[c]	SCO0046	SCO0046		Cofactor and Prosthetic Group Biosynthesis	0	0	1000	0	2	3.1.4.14
ACPpdscda	acyl-carrier-protein phosphodiesterase (calcium-dependent antibiotics)	ACPcda[c] + h2o[c] -> apoACPcda[c] + h[c] + pan4p[c]	SCO0046	SCO0046		Cofactor and Prosthetic Group Biosynthesis	0	0	1000	0	2	3.1.4.14
ACPpdsredL	acyl-carrier-protein phosphodiesterase (redL)	ACPredL[c] + h2o[c] -> apoACPredL[c] + h[c] + pan4p[c]	SCO0046	SCO0046		Cofactor and Prosthetic Group Biosynthesis	0	0	1000	0	2	3.1.4.14
ACPpdsredN	acyl-carrier-protein phosphodiesterase (redN)	ACPredN[c] + h2o[c] -> apoACPredN[c] + h[c] + pan4p[c]	SCO0046	SCO0046		Cofactor and Prosthetic Group Biosynthesis	0	0	1000	0	2	3.1.4.14
ACPpdsredQ	acyl-carrier-protein phosphodiesterase (redQ)	ACPredQ[c] + h2o[c] -> apoACPredQ[c] + h[c] + pan4p[c]	SCO0046	SCO0046		Cofactor and Prosthetic Group Biosynthesis	0	0	1000	0	2	3.1.4.14
ACPS1	acyl-carrier protein synthase	apoACP[c] + coa[c] -> ACP[c] + h[c] + pap[c]	SCO4744	SCO4744	acpS	Cofactor and Prosthetic Group Biosynthesis	0	0	1000	0	4	2.7.8.7		Dall'aglio P, Arthur CJ, Williams C, Vasilakis K, Maple HJ, Crosby J, Crump MP, Hadfield AT.#2011#Analysis of Streptomyces coelicolor phosphopantetheinyl transferase, AcpS, reveals the basis for relaxed substrate specificity.#Biochemistry.#50#5704-5717#
ACPSact	acyl-carrier protein synthase (actinorhodin)	apoACPact[c] + coa[c] -> ACPact[c] + h[c] + pap[c]	SCO4744	SCO4744	acpS	Cofactor and Prosthetic Group Biosynthesis	0	0	1000	0	4	2.7.8.7		Dall'aglio P, Arthur CJ, Williams C, Vasilakis K, Maple HJ, Crosby J, Crump MP, Hadfield AT.#2011#Analysis of Streptomyces coelicolor phosphopantetheinyl transferase, AcpS, reveals the basis for relaxed substrate specificity.#Biochemistry.#50#5704-5717#
ACPScda	acyl-carrier protein synthase (calcium-dependent antibiotics)	apoACPcda[c] + coa[c] -> ACPcda[c] + h[c] + pap[c]	SCO6673	SCO6673		Cofactor and Prosthetic Group Biosynthesis	0	0	1000	0	3	2.7.8.7		Lu YW, San Roman AK, Gehring AM.#2008#Role of phosphopantetheinyl transferase genes in antibiotic production by Streptomyces coelicolor.#J Bacteriol.#190#6903-6908#
ACPSredL	acyl-carrier protein synthase (redL)	apoACPredL[c] + coa[c] -> ACPredL[c] + h[c] + pap[c]	SCO4744	SCO4744	acpS	Cofactor and Prosthetic Group Biosynthesis	0	0	1000	0	4	2.7.8.7		Dall'aglio P, Arthur CJ, Williams C, Vasilakis K, Maple HJ, Crosby J, Crump MP, Hadfield AT.#2011#Analysis of Streptomyces coelicolor phosphopantetheinyl transferase, AcpS, reveals the basis for relaxed substrate specificity.#Biochemistry.#50#5704-5717#
ACPSredN	acyl-carrier protein synthase (redN)	apoACPredN[c] + coa[c] -> ACPredN[c] + h[c] + pap[c]	SCO4744	SCO4744	acpS	Cofactor and Prosthetic Group Biosynthesis	0	0	1000	0	4	2.7.8.7		Dall'aglio P, Arthur CJ, Williams C, Vasilakis K, Maple HJ, Crosby J, Crump MP, Hadfield AT.#2011#Analysis of Streptomyces coelicolor phosphopantetheinyl transferase, AcpS, reveals the basis for relaxed substrate specificity.#Biochemistry.#50#5704-5717#
ACPSredQ	acyl-carrier protein synthase (redQ)	apoACPredQ[c] + coa[c] -> ACPredQ[c] + h[c] + pap[c]	SCO4744	SCO4744	acpS	Cofactor and Prosthetic Group Biosynthesis	0	0	1000	0	4	2.7.8.7		Dall'aglio P, Arthur CJ, Williams C, Vasilakis K, Maple HJ, Crosby J, Crump MP, Hadfield AT.#2011#Analysis of Streptomyces coelicolor phosphopantetheinyl transferase, AcpS, reveals the basis for relaxed substrate specificity.#Biochemistry.#50#5704-5717#
ADCL	4-aminobenzoate synthase	4adcho[c] -> 4abz[c] + h[c] + pyr[c]				Cofactor and Prosthetic Group Biosynthesis	0	0	1000	0	1		Required for growth (tetrahydrofolate biosynthesis)
ADCPS1	adenosylcobinamide-phosphate synthase	adcobhex[c] + appl[c] + atp[c] -> adocbi[c] + adp[c] + h[c] + pi[c]	SCO1847	SCO1847	cobD	Cofactor and Prosthetic Group Biosynthesis	0	0	1000	0	2
ADCPS2	adenosylcobinamide-phosphate synthase	adcobhex[c] + applp[c] + atp[c] -> adocbip[c] + adp[c] + h[c] + pi[c]	SCO1847	SCO1847	cobD	Cofactor and Prosthetic Group Biosynthesis	0	0	1000	0	2
ADCS	4-amino-4-deoxychorismate synthase	chor[c] + gln-L[c] -> 4adcho[c] + glu-L[c]	SCO3851	SCO3851		Cofactor and Prosthetic Group Biosynthesis	0	0	1000	0	2	2.6.1.85
ADCYRS	adenosylcobyric acid synthase (glutamine-hydrolysing)	adcobdam[c] + 4 atp[c] + 4 gln-L[c] + 4 h2o[c] -> adcobhex[c] + 4 adp[c] + 4 glu-L[c] + 4 h[c] + 4 pi[c]	SCO1848	SCO1848	cobQ	Cofactor and Prosthetic Group Biosynthesis	0	0	1000	0	2
ADOCBIK	Adenosyl cobinamide kinase	adocbi[c] + atp[c] -> adocbip[c] + adp[c] + h[c]	SCO2173	SCO2173		Cofactor and Prosthetic Group Biosynthesis	0	0	1000	0	2
ADOCBLS	Adenosylcobalamin 5'-phosphate synthase	agdpcbi[c] + rdmbzi[c] -> adocbl[c] + gmp[c] + h[c]	SCO2177	SCO2177		Cofactor and Prosthetic Group Biosynthesis	0	0	1000	0	2
AHMMPS	4-amino-5-hydroxymethyl-2-methylpyrimidine synthetase	air[c] + 2 h[c] -> 4ahmmp[c] + gcald[c] + pi[c]	SCO3928	SCO3928	thiC	Cofactor and Prosthetic Group Biosynthesis	0	0	1000	0	2
AKP1	alkaline phosphatase (Dihydroneopterin)	ahdt[c] + 3 h2o[c] -> dhnpt[c] + 2 h[c] + 3 pi[c]	(SCO0828 or SCO1290 or SCO2068 or SCO2286)	SCO0828 SCO1290 SCO2068 SCO2286		Cofactor and Prosthetic Group Biosynthesis	0	0	1000	0	2	3.1.3.1
ALATA_D2	D-alanine transaminase	ala-D[c] + pydx5p[c] -> pyam5p[c] + pyr[c]	(SCO1087 or SCO4837 or SCO5470 or SCO5364)	SCO1087 SCO4837 SCO5470 SCO5364	glyA1 glyA2 glyA3	Cofactor and Prosthetic Group Biosynthesis	0	0	1000	0	2
ALATA_L2	alanine transaminase	ala-L[c] + pydx5p[c] -> pyam5p[c] + pyr[c]	(SCO1087 or SCO4837 or SCO5470 or SCO5364)	SCO1087 SCO4837 SCO5470 SCO5364	glyA1 glyA2 glyA3	Cofactor and Prosthetic Group Biosynthesis	0	0	1000	0	2
AMAOTr	adenosylmethionine-8-amino-7-oxononanoate transaminase	8aonn[c] + amet[c] <=> amob[c] + dann[c]	SCO1245	SCO1245	bioA	Cofactor and Prosthetic Group Biosynthesis	1	-1000	1000	0	2	2.6.1.62
AMMQLT9	S-adenosylmethione:2-demthylmenaquinole methyltransferase (menaquinone 9)	2dmmql9[c] + amet[c] -> ahcys[c] + h[c] + mql9[c]	(SCO4556 or SCO5940)	SCO4556 SCO5940		Cofactor and Prosthetic Group Biosynthesis	0	0	1000	0	2
AOXSr2	8-amino-7-oxononanoate synthase	ala-L[c] + pimACP[c] -> 8aonn[c] + ACP[c] + co2[c]	(SCO1243 or SCO5890)	SCO1243 SCO5890	bioF redN	Cofactor and Prosthetic Group Biosynthesis	0	0	1000	0	2	2.3.1.47
APRAUR	5-amino-6-(5-phosphoribosylamino)uracil reductase	5apru[c] + h[c] + nadph[c] -> 5aprbu[c] + nadp[c]	(SCO2688 or SCO6058 or SCO4106)	SCO2688 SCO6058 SCO4106	ribD	Cofactor and Prosthetic Group Biosynthesis	0	0	1000	0	2	1.1.1.193
ASP1DC	aspartate 1-decarboxylase	asp-L[c] + h[c] -> ala-B[c] + co2[c]	(SCO0978 and SCO3416)	SCO0978 SCO3416	panD gad	Cofactor and Prosthetic Group Biosynthesis	0	0	1000	0	2	4.1.1.11
ASPO5	L-aspartate oxidase	asp-L[c] + fum[c] -> h[c] + iasp[c] + succ[c]	SCO3382	SCO3382	nadB	Cofactor and Prosthetic Group Biosynthesis	0	0	1000	0	2
ASPO6	L-aspartate oxidase	asp-L[c] + o2[c] -> h[c] + h2o2[c] + iasp[c]	SCO3382	SCO3382	nadB	Cofactor and Prosthetic Group Biosynthesis	0	0	1000	0	2
BACCL	biotin-[acetyl-CoA-carboxylase] ligase	atp[c] + btn[c] + h[c] -> btamp[c] + ppi[c]	SCO4927	SCO4927		Cofactor and Prosthetic Group Biosynthesis	0	0	1000	0	2	6.3.4.15
BMOCOS	bis-molybdenum cofactor synthase	moco[c] + mptamp[c] -> amp[c] + bmoco[c] + cu2[c]	(SCO3181 or SCO3827)	SCO3181 SCO3827	moeA	Cofactor and Prosthetic Group Biosynthesis	0	0	1000	0	2
BMOGDS1	bis-molybdopterin guanine dinucleotide synthase (single GDP)	bmoco[c] + gtp[c] + h[c] -> bmoco1gdp[c] + ppi[c]	SCO3828	SCO3828		Cofactor and Prosthetic Group Biosynthesis	0	0	1000	0	2
BMOGDS2	bis-molybdopterin guanine dinucleotide synthase	bmoco1gdp[c] + gtp[c] + h[c] -> bmocogdp[c] + ppi[c]	SCO3828	SCO3828		Cofactor and Prosthetic Group Biosynthesis	0	0	1000	0	2
BTS5	Biotin synthase	2fe2s[c] + amet[c] + dtbt[c] -> 2fe1s[c] + btn[c] + dad-5[c] + h[c] + met-L[c]	SCO1244	SCO1244	bioB	Cofactor and Prosthetic Group Biosynthesis	0	0	1000	0	2	2.8.1.6
BWCOGDS1	tungsten bispterin guanine dinucleotide synthase (single GDP)	bwco[c] + gtp[c] + h[c] -> bwco1gdp[c] + ppi[c]	SCO3828	SCO3828		Cofactor and Prosthetic Group Biosynthesis	0	0	1000	0	2
BWCOGDS2	tungsten bispterin guanine dinucleotide synthase	bwco1gdp[c] + gtp[c] + h[c] -> bwcogdp[c] + ppi[c]	SCO3828	SCO3828		Cofactor and Prosthetic Group Biosynthesis	0	0	1000	0	2
BWCOS	tungsten bispterin cofactor synthase	mptamp[c] + wco[c] -> amp[c] + bwco[c] + cu2[c]	(SCO3181 or SCO3827)	SCO3181 SCO3827	moeA	Cofactor and Prosthetic Group Biosynthesis	0	0	1000	0	2
CBIAT	Cobinamide adenyltransferase	atp[c] + cbi[c] + h[c] <=> adocbi[c] + pppi[c]	SCO1851	SCO1851	cobO	Cofactor and Prosthetic Group Biosynthesis	1	-1000	1000	0	2	2.5.1.17
CBLAT	cob(I)alamin adenosyltransferase	atp[c] + cbl1[c] + h[c] <=> adocbl[c] + pppi[c]				Cofactor and Prosthetic Group Biosynthesis	1	-1000	1000	0	1	2.5.1.17	To utilize extracellular cob(1)alamin
CDPMEK	4-(cytidine 5'-diphospho)-2-C-methyl-D-erythritol kinase	4c2me[c] + atp[c] -> 2p4c2me[c] + adp[c] + h[c]	SCO3148	SCO3148		Cofactor and Prosthetic Group Biosynthesis	0	0	1000	0	2	2.7.1.148
CFL	chorismate futalosine-lyase	chor[c] + pep[c] + ins[c] + h[c] -> futal[c] + pyr[c] + h2o[c] + pi[c] + co2[c]	SCO4506	SCO4506	mqnA	Cofactor and Prosthetic Group Biosynthesis	0	0	1000	0	3			Hiratsuka T, Furihata K, Ishikawa J, Yamashita H, Itoh N, Seto H, Dairi T.#2008#An alternative menaquinone biosynthetic pathway operating in microorganisms.#Science.#321#1670-1673#
CIGAMS	cys-1L-myo-inositol 2-deoxy-D-glucopyranoside synthase	atp[c] + cys-L[c] + igam[c] -> amp[c] + cigam[c] + 2 h[c] + ppi[c]	SCO1663	SCO1663	mshC	Cofactor and Prosthetic Group Biosynthesis	0	0	1000	0	3			Park JH, Cha CJ, Roe JH.#2006#Identification of genes for mycothiol biosynthesis in Streptomyces coelicolor A3(2).#J Microbiol.#44#121-125
COCHL	cobaltochelatase	atp[c] + cobalt2[c] + h2o[c] + hgbam[c] -> adp[c] + co2dam[c] + 2 h[c] + pi[c]	SCO1849	SCO1849	cobN	Cofactor and Prosthetic Group Biosynthesis	0	0	1000	0	3		Aerobic adenosylcobalamin biosynthetic pathway	Borovok I, Gorovitz B, Yanku M, Schreiber R, Gust B, Chater K, Aharonowitz Y, Cohen G.#2004#Alternative oxygen-dependent and oxygen-independent ribonucleotide reductases in Streptomyces: cross-regulation and physiological role in response to oxygen limitation.#Mol Microbiol.#54#1022-1035#
CPC2MT	cobalt-precorrin-2 C20-methyltransferase	amet[c] + copre2[c] -> ahcys[c] + h[c] + copre3[c]	SCO1853	SCO1853	cobI	Cofactor and Prosthetic Group Biosynthesis	0	0	1000	0	2	2.1.1.130	Anaerobic adenosylcobalamin biosynthetic pathway (incomplete)
CPC3MT	cobalt-precorrin-3B C17-methyltransferase	amet[c] + copre3[c] -> ahcys[c] + copre4[c]	SCO1857	SCO1857		Cofactor and Prosthetic Group Biosynthesis	0	0	1000	0	2	2.1.1.131	Anaerobic adenosylcobalamin biosynthetic pathway (incomplete)
CPC4MT	cobalt-precorrin-4 C11-methyltransferase	amet[c] + copre4[c] -> ahcys[c] + h[c] + copre5[c]	SCO1855	SCO1855		Cofactor and Prosthetic Group Biosynthesis	0	0	1000	0	2	2.1.1.133	Anaerobic adenosylcobalamin biosynthetic pathway (incomplete)
CPC5MT	cobalt-precorrin-5 C1-methyltransferase	amet[c] + h2o[c] + copre5[c] -> acald[c] + ahcys[c] + h[c] + copre6[c]	SCO1857	SCO1857		Cofactor and Prosthetic Group Biosynthesis	0	0	1000	0	2		Anaerobic adenosylcobalamin biosynthetic pathway (incomplete)
CPC6R	cobalt-precorrin-6A reductase	h[c] + nadph[c] + copre6[c] -> nadp[c] + codhpre6[c]	SCO3283	SCO3283		Cofactor and Prosthetic Group Biosynthesis	0	0	1000	0	2	1.3.1.54	Anaerobic adenosylcobalamin biosynthetic pathway (incomplete)
CPC8MM	cobalt-precorrin-8X methylmutase	copre8[c] <=> cobya[c]	SCO3282	SCO3282	cobH	Cofactor and Prosthetic Group Biosynthesis	1	-1000	1000	0	2	5.4.1.2	Anaerobic adenosylcobalamin biosynthetic pathway (incomplete)
CPMPS	cyclic pyranopterin monophosphate synthase	gtp[c] + h2o[c] -> cpmp[c] + ppi[c]	(SCO1821 and SCO3180)	SCO1821 SCO3180	moaA moaC	Cofactor and Prosthetic Group Biosynthesis	0	0	1000	0	3			Fischer M, Alderson J, van Keulen G, White J, Sawers RG.#2010#The obligate aerobe Streptomyces coelicolor A3(2) synthesizes three active respiratory nitrate reductases.#Microbiology.#156#3166-3179#
CPPPGO2	Oxygen Independent coproporphyrinogen-III oxidase	2 amet[c] + cpppg3[c] -> 2 co2[c] + 2 dad-5[c] + 2 met-L[c] + pppg9[c]	SCO2559	SCO2559		Cofactor and Prosthetic Group Biosynthesis	0	0	1000	0	2
CYRDAAT	cob(I)yrinic acid a,c-diamide adenosyltransferase	atp[c] + co1dam[c] + h[c] -> adcobdam[c] + pppi[c]	SCO1851	SCO1851	cobO	Cofactor and Prosthetic Group Biosynthesis	0	0	1000	0	2	2.5.1.17
CYRDAR	cob(II)yrinic acid a,c-diamide reductase	2 co2dam[c] + nadh[c] -> 2 co1dam[c] + h[c] + nad[c]				Cofactor and Prosthetic Group Biosynthesis	0	0	1000	0	1		Required for growth (adenosylcobalamin biosynthesis)
CYRDAS	Cob(II)yrinate a,c-diamide synthase (glutamine-hydrolysing)	2 atp[c] + cobya[c] + 2 gln-L[c] + h2o[c] -> 2 adp[c] + co2dam[c] + 2 glu-L[c] + h[c] + ppi[c]	SCO1852	SCO1852	cobB	Cofactor and Prosthetic Group Biosynthesis	0	0	1000	0	2	6.3.5.11	Anaerobic adenosylcobalamin biosynthetic pathway (incomplete)
DB4PS	3,4-Dihydroxy-2-butanone-4-phosphate synthase	ru5p-D[c] -> db4p[c] + for[c] + h[c]	SCO1441	SCO1441	ribAB	Cofactor and Prosthetic Group Biosynthesis	0	0	1000	0	4			Spoonamore JE, Dahlgran AL, Jacobsen NE, Bandarian V.#2006#Evolution of new function in the GTP cyclohydrolase II proteins of Streptomyces coelicolor.#Biochemistry.#45#12144-12155#
DBTS	dethiobiotin synthase	atp[c] + co2[c] + dann[c] -> adp[c] + dtbt[c] + 3 h[c] + pi[c]	SCO1246	SCO1246	bioD	Cofactor and Prosthetic Group Biosynthesis	0	0	1000	0	2	6.3.3.3
DHFR	dihydrofolate reductase	dhf[c] + h[c] + nadph[c] <=> nadp[c] + thf[c]				Cofactor and Prosthetic Group Biosynthesis	1	-1000	1000	0	1	1.5.1.3	Required for growth (tetrahydrofolate biosynthesis)
DHFS	dihydrofolate synthase	atp[c] + dhpt[c] + glu-L[c] -> adp[c] + dhf[c] + h[c] + pi[c]	SCO2614	SCO2614	fpgS	Cofactor and Prosthetic Group Biosynthesis	0	0	1000	0	2	6.3.2.12
DHFUTALS	de-hypoxanthine futalosine synthase	dhfutal[c] + nad[c] -> cdhfutal[c] + nadh[c] + h[c]	SCO4550	SCO4550	mqnC	Cofactor and Prosthetic Group Biosynthesis	0	0	1000	0	3			Hiratsuka T, Furihata K, Ishikawa J, Yamashita H, Itoh N, Seto H, Dairi T.#2008#An alternative menaquinone biosynthetic pathway operating in microorganisms.#Science.#321#1670-1673#
DHNAI	1,4-dihydroxynaphthoate isomerization (hypothetical reaction)	dh6na[c] -> dhna[c]				Cofactor and Prosthetic Group Biosynthesis	0	0	1000	0	1		Required for growth (menaquinone biosynthesis)
DHNANT4	1,4-dihydroxy-2-naphthoate nonaprenyltransferase	dhna[c] + h[c] + nndp[c] -> 2dmmql9[c] + co2[c] + ppi[c]				Cofactor and Prosthetic Group Biosynthesis	0	0	1000	0	1		Required for growth (menaquinone biosynthesis)
DHNAS	1,4-dihydroxy-6-naphthoate synthase	cdhfutal[c] -> dh6na[c] + glyald[c]	SCO4326	SCO4326	mqnD	Cofactor and Prosthetic Group Biosynthesis	0	0	1000	0	3			Hiratsuka T, Furihata K, Ishikawa J, Yamashita H, Itoh N, Seto H, Dairi T.#2008#An alternative menaquinone biosynthetic pathway operating in microorganisms.#Science.#321#1670-1673#
DHNPA2r	dihydroneopterin aldolase reversible	dhnpt[c] <=> 6hmhpt[c] + gcald[c]	SCO3400	SCO3400	folB	Cofactor and Prosthetic Group Biosynthesis	1	-1000	1000	0	2	4.1.2.25
DHNPTE	Dihydroneopterin epimerase	dhnpt[c] <=> dhmpt[c]	SCO3400	SCO3400	folB	Cofactor and Prosthetic Group Biosynthesis	1	-1000	1000	0	2
DHPPDA2	diaminohydroxyphosphoribosylaminopryrimidine deaminase (25drapp)	25drapp[c] + h[c] + h2o[c] -> 5apru[c] + nh4[c]	SCO2688	SCO2688	ribD	Cofactor and Prosthetic Group Biosynthesis	0	0	1000	0	2	3.5.4.26
DHPS2	dihydropteroate synthase	4abz[c] + 6hmhptpp[c] -> dhpt[c] + ppi[c]	(SCO3398 or SCO5141)	SCO3398 SCO5141	folP	Cofactor and Prosthetic Group Biosynthesis	0	0	1000	0	2	2.5.1.15
DMATT	dimethylallyltranstransferase	dmpp[c] + ipdp[c] -> grdp[c] + ppi[c]	(SCO0185 or SCO0565 or SCO5250 or SCO6763)	SCO0185 SCO0565 SCO5250 SCO6763	crtE gtr	Cofactor and Prosthetic Group Biosynthesis	0	0	1000	0	2	2.5.1.1
DMBZIDS	5,6-dimethylbenzimidazole synthase	fmnh2[c] + o2[c] -> dmbzid[c] + dalua[c] + e4p[c]				Cofactor and Prosthetic Group Biosynthesis	0	0	1000	0	1	1.14.99.40	Required for growth (adenosylcobalamin biosynthesis)
DMPPS	1-hydroxy-2-methyl-2-(E)-butenyl 4-diphosphate reductase (dmpp)	h[c] + h2mb4p[c] + nadh[c] -> dmpp[c] + h2o[c] + nad[c]	SCO5058	SCO5058	lytB	Cofactor and Prosthetic Group Biosynthesis	0	0	1000	0	2	1.17.1.2
DNADDP	Deaminido NAD diphosphatase	h2o[c] + dnad[c] -> amp[c] + 2 h[c] + nicrnt[c]	SCO5186	SCO5186		Cofactor and Prosthetic Group Biosynthesis	0	0	1000	0	2	3.6.1.22
DPCOAK	dephospho-CoA kinase	atp[c] + dpcoa[c] -> adp[c] + coa[c] + h[c]	SCO1996	SCO1996	coaE	Cofactor and Prosthetic Group Biosynthesis	0	0	1000	0	2	2.7.1.24
DPR	2-dehydropantoate 2-reductase	2dhp[c] + h[c] + nadph[c] -> nadp[c] + pant-R[c]	SCO6562	SCO6562		Cofactor and Prosthetic Group Biosynthesis	0	0	1000	0	2	1.1.1.169
DXPRIi	1-deoxy-D-xylulose reductoisomerase	dxyl5p[c] + h[c] + nadph[c] -> 2me4p[c] + nadp[c]	SCO5694	SCO5694	dxr	Cofactor and Prosthetic Group Biosynthesis	0	0	1000	0	2	1.1.1.267
DXPS	1-deoxy-D-xylulose 5-phosphate synthase	g3p[c] + h[c] + pyr[c] -> co2[c] + dxyl5p[c]	(SCO6013 or SCO6768)	SCO6013 SCO6768		Cofactor and Prosthetic Group Biosynthesis	0	0	1000	0	2	2.2.1.7
DXYLK	1-Deoxy-D-xylulose kinase	atp[c] + dxyl[c] -> adp[c] + dxyl5p[c] + h[c]	(SCO1170 or SCO2462)	SCO1170 SCO2462	xylB	Cofactor and Prosthetic Group Biosynthesis	0	0	1000	0	2
E4PD	Erythrose 4-phosphate dehydrogenase	e4p[c] + h2o[c] + nad[c] <=> 4per[c] + 2 h[c] + nadh[c]	(SCO1947 or SCO7040 or SCO7511)	SCO1947 SCO7040 SCO7511	gap1 gap2	Cofactor and Prosthetic Group Biosynthesis	1	-1000	1000	0	2
EGMEACPR	Enoylglutaryl-[ACP] methyl ester reductase	egmeACP[c] + h[c] + nadph[c] -> gmeACP[c] + nadp[c]	SCO1814	SCO1814	inhA	Cofactor and Prosthetic Group Biosynthesis	0	0	1000	0	2	1.3.1.10
EPMEACPR	Enoylpimeloyl-[ACP] methyl ester reductase	epmeACP[c] + h[c] + nadph[c] -> nadp[c] + pmeACP[c]	SCO1814	SCO1814	inhA	Cofactor and Prosthetic Group Biosynthesis	0	0	1000	0	2	1.3.1.10
FADRx2	FAD reductase	fad[c] + h[c] + nadph[c] -> fadh2[c] + nadp[c]	SCO6102	SCO6102	sirA	Cofactor and Prosthetic Group Biosynthesis	0	0	1000	0	2
FCLT	Ferrochelatase	fe2[c] + ppp9[c] -> 2 h[c] + pheme[c]	SCO5859	SCO5859	hemH	Cofactor and Prosthetic Group Biosynthesis	0	0	1000	0	2	4.99.1.1
FE3Ri	Fe(III) reduction	fadh2[c] + 2 fe3[c] -> fad[c] + 2 fe2[c] + 2 h[c]				Cofactor and Prosthetic Group Biosynthesis	0	0	1000	0	1		To reduce intracellular Fe(III)
FESD1s	iron-sulfur cluster damage (peroxide, spontaneous)	2 4fe4s[c] + 2 h[c] + h2o2[c] -> 2 3fe4s[c] + 2 fe3[c] + 2 h2o[c]	s0001	s0001	SPONTANEOUS	Cofactor and Prosthetic Group Biosynthesis	0	0	1000	0	1		Spontaneous reaction
FESD2s	iron-sulfur cluster damage (nitrous oxide, spontaneous)	2 4fe4s[c] + 2 h[c] + 2 no[c] -> 2 3fe4s[c] + 2 fe3[c] + h2o[c] + n2o[c]	s0001	s0001	SPONTANEOUS	Cofactor and Prosthetic Group Biosynthesis	0	0	1000	0	1		Spontaneous reaction
FESR	iron-sulfur cluster repair	3fe4s[c] + fe2[c] -> 4fe4s[c]				Cofactor and Prosthetic Group Biosynthesis	0	0	1000	0	1		To impose oxdative stress condition, paired with iron-sulfur cluster damage rxns
FLVR	flavin reductase	h[c] + nadph[c] + ribflv[c] -> nadp[c] + rbflvrd[c]	SCO6102	SCO6102	sirA	Cofactor and Prosthetic Group Biosynthesis	0	0	1000	0	2	1.5.1.30
FMNAT	FMN adenylyltransferase	atp[c] + fmn[c] + h[c] -> fad[c] + ppi[c]	SCO5711	SCO5711		Cofactor and Prosthetic Group Biosynthesis	0	0	1000	0	2	2.7.7.2
FMNRx	FMN reductase	fmn[c] + h[c] + nadh[c] -> fmnh2[c] + nad[c]	SCO3295	SCO3295		Cofactor and Prosthetic Group Biosynthesis	0	0	1000	0	2
FMNRx2	FMN reductase	fmn[c] + h[c] + nadph[c] -> fmnh2[c] + nadp[c]	(SCO3295 or SCO6102)	SCO3295 SCO6102	sirA	Cofactor and Prosthetic Group Biosynthesis	0	0	1000	0	2
FRTT	farnesyltranstransferase	frdp[c] + ipdp[c] -> ggdp[c] + ppi[c]	(SCO0185 or SCO0565 or SCO5250 or SCO6763)	SCO0185 SCO0565 SCO5250 SCO6763	crtE gtr	Cofactor and Prosthetic Group Biosynthesis	0	0	1000	0	2	2.5.1.29
FUTALH	futalosine hydrolase	futal[c] + h2o[c] -> dhfutal[c] + hxan[c]	SCO4327	SCO4327	mqnB	Cofactor and Prosthetic Group Biosynthesis	0	0	1000	0	3	3.2.2.26		Hiratsuka T, Furihata K, Ishikawa J, Yamashita H, Itoh N, Seto H, Dairi T.#2008#An alternative menaquinone biosynthetic pathway operating in microorganisms.#Science.#321#1670-1673#
G1SAT	glutamate-1-semialdehyde aminotransferase	glu1sa[c] <=> 5aop[c]	(SCO0401 or SCO4469)	SCO0401 SCO4469	hemL	Cofactor and Prosthetic Group Biosynthesis	1	-1000	1000	0	2	5.4.3.8
GDPDPK	GDP diphosphokinase	atp[c] + gdp[c] -> amp[c] + ppgpp[c] + h[c]	(SCO1513 or SCO5794)	SCO1513 SCO5794	relA rshA	Cofactor and Prosthetic Group Biosynthesis	0	0	1000	0	3			Ryu YG, Kim ES, Kim DW, Kim SK, Lee KJ.#2007#Differential stringent responses of Streptomyces coelicolor M600 to starvation of specific nutrients.#J Microbiol Biotechnol.#17#305-312#
GDPTPDP	guanosine 3'-diphosphate 5'-triphosphate 3'-diphosphatase	gdptp[c] + h2o[c] -> gtp[c] + ppi[c]	(SCO1513 or SCO5794)	SCO1513 SCO5794	relA rshA	Cofactor and Prosthetic Group Biosynthesis	0	0	1000	0	3	3.1.7.2		Ryu YG, Kim ES, Kim DW, Kim SK, Lee KJ.#2007#Differential stringent responses of Streptomyces coelicolor M600 to starvation of specific nutrients.#J Microbiol Biotechnol.#17#305-312#
GGTT	geranylgeranyltranstransferase	ggdp[c] + ipdp[c] -> ppdp[c] + ppi[c]	SCO4583	SCO4583		Cofactor and Prosthetic Group Biosynthesis	0	0	1000	0	2
GLUTRR	glutamyl-tRNA reductase	glutrna[c] + h[c] + nadph[c] -> glu1sa[c] + nadp[c] + trnaglu[c]	SCO3319	SCO3319	hemA	Cofactor and Prosthetic Group Biosynthesis	0	0	1000	0	2
GLUTRS	Glutamyl-tRNA synthetase	atp[c] + glu-L[c] + trnaglu[c] -> amp[c] + glutrna[c] + ppi[c]	SCO5547	SCO5547	gltX	Cofactor and Prosthetic Group Biosynthesis	0	0	1000	0	2	6.1.1.17
GRTT	geranyltranstransferase	grdp[c] + ipdp[c] -> frdp[c] + ppi[c]	(SCO0185 or SCO0565 or SCO5250 or SCO6763)	SCO0185 SCO0565 SCO5250 SCO6763	crtE gtr	Cofactor and Prosthetic Group Biosynthesis	0	0	1000	0	2	2.5.1.10
GTHRDH	glutathione hydralase	gthrd[c] + h2o[c] -> cgly[c] + glu-L[c]	(SCO5945 or SCO6407 or SCO6444)	SCO5945 SCO6407 SCO6444		Cofactor and Prosthetic Group Biosynthesis	0	0	1000	0	2
GTPCI	GTP cyclohydrolase I	gtp[c] + h2o[c] -> ahdt[c] + for[c] + h[c]	SCO3403	SCO3403	folE	Cofactor and Prosthetic Group Biosynthesis	0	0	1000	0	2	3.5.4.16
GTPCII2	GTP cyclohydrolase II (25drapp)	gtp[c] + 3 h2o[c] -> 25drapp[c] + for[c] + 2 h[c] + ppi[c]	(SCO1441 or SCO2687)	SCO1441 SCO2687	ribAB ribA1	Cofactor and Prosthetic Group Biosynthesis	0	0	1000	0	4			Spoonamore JE, Dahlgran AL, Jacobsen NE, Bandarian V.#2006#Evolution of new function in the GTP cyclohydrolase II proteins of Streptomyces coelicolor.#Biochemistry.#45#12144-12155#
GTPCIII2	GTP cyclohydrolase III (2a5farapp)	gtp[c] + 2 h2o[c] -> 2a5farapp[c] + h[c] + ppi[c]	SCO6655	SCO6655	ribA2	Cofactor and Prosthetic Group Biosynthesis	0	0	1000	0	4			Spoonamore JE, Dahlgran AL, Jacobsen NE, Bandarian V.#2006#Evolution of new function in the GTP cyclohydrolase II proteins of Streptomyces coelicolor.#Biochemistry.#45#12144-12155#
GTPDPDP	guanosine-5'-triphosphate,3'-diphosphate diphosphatase	gdptp[c] + h2o[c] -> h[c] + pi[c] + ppgpp[c]	(SCO3093 or SCO3348)	SCO3093 SCO3348		Cofactor and Prosthetic Group Biosynthesis	0	0	1000	0	2	3.6.1.40
GTPDPK	GTP diphosphokinase	atp[c] + gtp[c] -> amp[c] + gdptp[c] + h[c]	(SCO1513 or SCO5794)	SCO1513 SCO5794	relA rshA	Cofactor and Prosthetic Group Biosynthesis	0	0	1000	0	3	2.7.6.5		Ryu YG, Kim ES, Kim DW, Kim SK, Lee KJ.#2007#Differential stringent responses of Streptomyces coelicolor M600 to starvation of specific nutrients.#J Microbiol Biotechnol.#17#305-312#
HBADAS	hydrogenobyrinic acid a,c-diamide synthase (glutamine-hydrolysing)	2 atp[c] + 2 gln-L[c] + h2o[c] + hgbyr[c] -> 2 adp[c] + 2 glu-L[c] + 2 h[c] + hgbam[c] + ppi[c]	SCO1852	SCO1852	cobB	Cofactor and Prosthetic Group Biosynthesis	0	0	1000	0	2	6.3.5.9	Aerobic adenosylcobalamin biosynthetic pathway, BiGG database reaction name : R05224
HEMEAS	Heme A synthase	h2o[c] + hemeO[c] -> 4 h[c] + hemeA_#1[c]	SCO1930	SCO1930		Cofactor and Prosthetic Group Biosynthesis	0	0	1000	0	2
HEMEOS	Heme O synthase	frdp[c] + h2o[c] + pheme[c] -> hemeO[c] + ppi[c]	SCO1934	SCO1934		Cofactor and Prosthetic Group Biosynthesis	0	0	1000	0	2
HEPTT	trans-hexaprenyltranstransferase	hepdp[c] + ipdp[c] -> octdp[c] + ppi[c]	SCO4583	SCO4583		Cofactor and Prosthetic Group Biosynthesis	0	0	1000	0	2	2.5.1.30
HEXTT	trans-hexaprenyltranstransferase	hexdp[c] + ipdp[c] -> hepdp[c] + ppi[c]	SCO4583	SCO4583		Cofactor and Prosthetic Group Biosynthesis	0	0	1000	0	2	2.5.1.30
HMBS	hydroxymethylbilane synthase	h2o[c] + 4 ppbng[c] -> hmbil[c] + 4 nh4[c]	(SCO7343 or SCO3318)	SCO7343 SCO3318	hemC	Cofactor and Prosthetic Group Biosynthesis	0	0	1000	0	2	4.3.1.8
HMPK1	hydroxymethylpyrimidine kinase (ATP)	4ahmmp[c] + atp[c] -> 4ampm[c] + adp[c] + h[c]	SCO5563	SCO5563	thiD	Cofactor and Prosthetic Group Biosynthesis	0	0	1000	0	2	2.7.1.49
HMPK2	hydroxymethylpyrimidine kinase (CTP)	4ahmmp[c] + ctp[c] -> 4ampm[c] + cdp[c] + h[c]	SCO5563	SCO5563	thiD	Cofactor and Prosthetic Group Biosynthesis	0	0	1000	0	2	2.7.1.49
HMPK3	hydroxymethylpyrimidine kinase (UTP)	4ahmmp[c] + utp[c] -> 4ampm[c] + udp[c] + h[c]	SCO5563	SCO5563	thiD	Cofactor and Prosthetic Group Biosynthesis	0	0	1000	0	2	2.7.1.49
HMPK4	hydroxymethylpyrimidine kinase (GTP)	4ahmmp[c] + gtp[c] -> 4ampm[c] + gdp[c] + h[c]	SCO5563	SCO5563	thiD	Cofactor and Prosthetic Group Biosynthesis	0	0	1000	0	2	2.7.1.49
HPPK2	6-hydroxymethyl-dihydropterin pyrophosphokinase	6hmhpt[c] + atp[c] -> 6hmhptpp[c] + amp[c] + h[c]	SCO3401	SCO3401	folK	Cofactor and Prosthetic Group Biosynthesis	0	0	1000	0	2	2.7.6.3
IACGAMS2	1L-myo-inositol 2-Acetamido-2-deoxy-D-glucopyranoside synthesis (UDP-GlcNAc)	uacgam[c] + mi1p-L[c] + h2o[c] -> iacgam[c] + udp[c] + pi[c] + h[c]	SCO4204	SCO4204	mshA	Cofactor and Prosthetic Group Biosynthesis	0	0	1000	0	3			Park JH, Cha CJ, Roe JH.#2006#Identification of genes for mycothiol biosynthesis in Streptomyces coelicolor A3(2).#J Microbiol.#44#121-125
ICYSDS	ISC/NIF Cysteine desulfuration	cys-L[c] + iscs[c] -> ala-L[c] + iscssh[c]	SCO5486	SCO5486		Cofactor and Prosthetic Group Biosynthesis	0	0	1000	0	2			den Hengst CD, Buttner MJ.#2008#Redox control in actinobacteria.#Biochim Biophys Acta.#1780#1201-1216#
IGAMD	1L-myo-inositol 2-Acetamido-2-deoxy-D-glucopyranoside deacetylase	h2o[c] + iacgam[c] -> ac[c] + igam[c]	(SCO5126 or SCO4967)	SCO5126 SCO4967	mshB	Cofactor and Prosthetic Group Biosynthesis	0	0	1000	0	3			Park JH, Cha CJ, Roe JH.#2006#Identification of genes for mycothiol biosynthesis in Streptomyces coelicolor A3(2).#J Microbiol.#44#121-125
IPDDI	isopentenyl-diphosphate D-isomerase	ipdp[c] <=> dmpp[c]	SCO6750	SCO6750		Cofactor and Prosthetic Group Biosynthesis	1	-1000	1000	0	2	5.3.3.2
IPDPS	1-hydroxy-2-methyl-2-(E)-butenyl 4-diphosphate reductase (ipdp)	h[c] + h2mb4p[c] + nadh[c] -> h2o[c] + ipdp[c] + nad[c]	SCO5058	SCO5058	lytB	Cofactor and Prosthetic Group Biosynthesis	0	0	1000	0	2	1.17.1.2
LIPAMPL	Lipoyl-adenylate protein ligase	lipoamp[c] -> amp[c] + lipopb[c] + h[c]	SCO6423	SCO6423		Cofactor and Prosthetic Group Biosynthesis	0	0	1000	0	2
LIPATPT	Lipoate-ATP adenylate transferase	atp[c] + lipoate[c] -> lipoamp[c] + ppi[c]	SCO6423	SCO6423		Cofactor and Prosthetic Group Biosynthesis	0	0	1000	0	2
LIPOCT	Lipoyl(octanoyl) transferase	h[c] + ocACP[c] -> ACP[c] + octapb[c]	SCO2193	SCO2193	lipB	Cofactor and Prosthetic Group Biosynthesis	0	0	1000	0	2
LIPOS	Lipoate synthase	4fe4s[c] + 2 amet[c] + nad[c] + octapb[c] -> 2fe2s[c] + 2 dad-5[c] + 2 fe2[c] + lipopb[c] + 2 met-L[c] + nadh[c]	SCO2194	SCO2194	lipA	Cofactor and Prosthetic Group Biosynthesis	0	0	1000	0	2
MALACPMT	Malonyl-[ACP] methyltransferase	amet[c] + malACP[c] -> ahcys[c] + malACPme[c]				Cofactor and Prosthetic Group Biosynthesis	0	0	1000	0	1		Required for growth (biotin biosynthesis)
MECDPDH2	2C-methyl-D-erythritol 2,4 cyclodiphosphate dehydratase	2mecdp[c] + nadh[c] -> nad[c] + h2mb4p[c] + h2o[c]	(SCO5696 or SCO6767)	SCO5696 SCO6767	gcpE	Cofactor and Prosthetic Group Biosynthesis	0	0	1000	0	2	1.17.4.3
MECDPS	2-C-methyl-D-erythritol 2,4-cyclodiphosphate synthase	2p4c2me[c] -> 2mecdp[c] + cmp[c]	SCO4234	SCO4234	ispF	Cofactor and Prosthetic Group Biosynthesis	0	0	1000	0	2	4.6.1.12
MEPCT	2-C-methyl-D-erythritol 4-phosphate cytidylyltransferase	2me4p[c] + ctp[c] + h[c] -> 4c2me[c] + ppi[c]	SCO4233	SCO4233	ispD	Cofactor and Prosthetic Group Biosynthesis	0	0	1000	0	2	2.7.7.60
MOADSUx	MoaD sulfuration (nadh, assumed)	iscssh[c] + moadamp[c] + nadh[c] -> amp[c] + iscs[c] + moadcosh[c] + nad[c]	(SCO5486 and SCO5201)	SCO5486 SCO5201		Cofactor and Prosthetic Group Biosynthesis	0	0	1000	0	2
MOCOS	molybdenum cofactor synthase	2 h[c] + mobd[c] + mptamp[c] -> amp[c] + cu2[c] + h2o[c] + moco[c]	(SCO3181 or SCO3827)	SCO3181 SCO3827	moeA	Cofactor and Prosthetic Group Biosynthesis	0	0	1000	0	2
MOGDS	molybdopterin guanine dinucleotide synthase	gtp[c] + h[c] + moco[c] -> mocogdp[c] + ppi[c]	SCO3828	SCO3828		Cofactor and Prosthetic Group Biosynthesis	0	0	1000	0	2
MOHMT	3-methyl-2-oxobutanoate hydroxymethyltransferase	3mob[c] + h2o[c] + mlthf[c] -> 2dhp[c] + thf[c]	SCO2256	SCO2256	panB	Cofactor and Prosthetic Group Biosynthesis	0	0	1000	0	2	2.1.2.11
MPTAT	molybdopterin adenylyltransferase	atp[c] + h[c] + mpt[c] -> mptamp[c] + ppi[c]	SCO3179	SCO3179	moaB	Cofactor and Prosthetic Group Biosynthesis	0	0	1000	0	2
MPTS	molybdopterin synthase	cpmp[c] + cu2[c] + 2 moadcosh[c] -> 5 h[c] + 2 moadcoo[c] + mpt[c]	SCO5201	SCO5201		Cofactor and Prosthetic Group Biosynthesis	0	0	1000	0	2
MPTSS	molybdopterin synthase sulfurylase	atp[c] + h[c] + moadcoo[c] -> moadamp[c] + ppi[c]	SCO5178	SCO5178	moeB	Cofactor and Prosthetic Group Biosynthesis	0	0	1000	0	2
MSHS	mycothiol synthase	accoa[c] + cigam[c] -> coa[c] + msh[c]	SCO4151	SCO4151	mshD	Cofactor and Prosthetic Group Biosynthesis	0	0	1000	0	3			Park JH, Cha CJ, Roe JH.#2006#Identification of genes for mycothiol biosynthesis in Streptomyces coelicolor A3(2).#J Microbiol.#44#121-125
MYCTR	mycothiol reductase (nadp dependent)	2 msh[c] + nadp[c] <=> h[c] + mssg[c] + nadph[c]				Cofactor and Prosthetic Group Biosynthesis	1	-1000	1000	0	1		To reduce oxidized mycothiol
NADDP	NAD diphosphatase	h2o[c] + nad[c] -> amp[c] + 2 h[c] + nmn[c]	SCO5186	SCO5186		Cofactor and Prosthetic Group Biosynthesis	0	0	1000	0	2	3.6.1.22
NADK	NAD kinase	atp[c] + nad[c] -> adp[c] + h[c] + nadp[c]	SCO1781	SCO1781	ppnK	Cofactor and Prosthetic Group Biosynthesis	0	0	1000	0	2	2.7.1.23
NADS1	NAD synthase (nh3)	atp[c] + dnad[c] + nh4[c] -> amp[c] + h[c] + nad[c] + ppi[c]	SCO0506	SCO0506	nadE1	Cofactor and Prosthetic Group Biosynthesis	0	0	1000	0	2	6.3.1.5
NADS2	NAD synthase (glutamine-hydrolysing)	atp[c] + dnad[c] + gln-L[c] + h2o[c] -> amp[c] + glu-L[c] + h[c] + nad[c] + ppi[c]	SCO2238	SCO2238	nadE	Cofactor and Prosthetic Group Biosynthesis	0	0	1000	0	2	6.3.5.1
NAMNPP	nicotinic acid mononucleotide pyrophosphorylase	atp[c] + h2o[c] + nac[c] + prpp[c] -> adp[c] + nicrnt[c] + pi[c] + ppi[c]	(SCO0171 or SCO2917)	SCO0171 SCO2917		Cofactor and Prosthetic Group Biosynthesis	0	0	1000	0	2	2.4.2.11
NMNAT	nicotinamide-nucleotide adenylyltransferase	atp[c] + h[c] + nmn[c] -> nad[c] + ppi[c]	SCO2579	SCO2579	nadD	Cofactor and Prosthetic Group Biosynthesis	0	0	1000	0	2	2.7.7.1
NNAM	nicotinamidase	h2o[c] + ncam[c] -> nac[c] + nh4[c]	SCO2918	SCO2918		Cofactor and Prosthetic Group Biosynthesis	0	0	1000	0	2	3.5.1.19
NNDMBRT	Nicotinate-nucleotide dimethylbenzimidazole phosphoribosyltransferase	dmbzid[c] + nicrnt[c] -> 5prdmbz[c] + h[c] + nac[c]	(SCO1554 or SCO2175)	SCO1554 SCO2175		Cofactor and Prosthetic Group Biosynthesis	0	0	1000	0	2
NNDPR	nicotinate-nucleotide diphosphorylase (carboxylating)	2 h[c] + prpp[c] + quln[c] -> co2[c] + nicrnt[c] + ppi[c]	SCO3381	SCO3381	nadC	Cofactor and Prosthetic Group Biosynthesis	0	0	1000	0	2	2.4.2.19
OCTNLL	Octanoate non-lipoylated apo domain ligase	atp[c] + h[c] + octa[c] -> amp[c] + octapb[c] + ppi[c]	SCO6423	SCO6423		Cofactor and Prosthetic Group Biosynthesis	0	0	1000	0	2
OCTTT	trans-octaprenyltranstransferase	octdp[c] + ipdp[c] -> nndp[c] + ppi[c]	SCO4583	SCO4583		Cofactor and Prosthetic Group Biosynthesis	0	0	1000	0	2	2.5.1.11
OGMEACPD	3-Oxo-glutaryl-[ACP] methyl ester dehydratase	hgmeACP[c] -> egmeACP[c] + h2o[c]				Cofactor and Prosthetic Group Biosynthesis	0	0	1000	0	1	4.2.1.59	Required for growth (biotin biosynthesis)
OGMEACPR	3-Oxo-glutaryl-[ACP] methyl ester reductase	h[c] + nadph[c] + ogmeACP[c] -> hgmeACP[c] + nadp[c]	(SCO0330 or SCO1345 or SCO1346 or SCO1815 or SCO1831 or SCO4501 or SCO4681)	SCO0330 SCO1345 SCO1346 SCO1815 SCO1831 SCO4501 SCO4681	fabG	Cofactor and Prosthetic Group Biosynthesis	0	0	1000	0	2	1.1.1.100
OGMEACPS2	3-Oxo-glutaryl-[ACP] methyl ester synthase	h[c] + malACP[c] + malACPme[c] -> co2[c] + ACP[c] + ogmeACP[c]	(SCO0548 or (SCO2390 or SCO1266))	SCO0548 SCO2390 SCO1266	fabB2 fabF fabF2	Cofactor and Prosthetic Group Biosynthesis	0	0	1000	0	2
OHPBAT	O-Phospho-4-hydroxy-L-threonine:2-oxoglutarate aminotransferase	glu-L[c] + ohpb[c] <=> akg[c] + phthr[c]	SCO4366	SCO4366		Cofactor and Prosthetic Group Biosynthesis	1	-1000	1000	0	2	2.6.1.52
OPMEACPD	3-Oxo-pimeloyl-[ACP] methyl ester dehydratase	hpmeACP[c] -> epmeACP[c] + h2o[c]				Cofactor and Prosthetic Group Biosynthesis	0	0	1000	0	1	4.2.1.59	Required for growth (biotin biosynthesis)
OPMEACPR	3-Oxo-pimeloyl-[ACP] methyl ester reductase	h[c] + nadph[c] + opmeACP[c] -> hpmeACP[c] + nadp[c]	(SCO0330 or SCO1345 or SCO1346 or SCO1815 or SCO1831 or SCO4501 or SCO4681)	SCO0330 SCO1345 SCO1346 SCO1815 SCO1831 SCO4501 SCO4681	fabG	Cofactor and Prosthetic Group Biosynthesis	0	0	1000	0	2	1.1.1.100
OPMEACPS	3-Oxo-pimeloyl-[ACP] methyl ester synthase	gmeACP[c] + h[c] + malACP[c] -> ACP[c] + co2[c] + opmeACP[c]	(SCO0548 or (SCO2390 or SCO1266))	SCO0548 SCO2390 SCO1266	fabB2 fabF fabF2	Cofactor and Prosthetic Group Biosynthesis	0	0	1000	0	2	2.3.1.41
PANTS	pantothenate synthase	ala-B[c] + atp[c] + pant-R[c] -> amp[c] + h[c] + pnto-R[c] + ppi[c]	SCO3383	SCO3383		Cofactor and Prosthetic Group Biosynthesis	0	0	1000	0	2	6.3.2.1
PC11M	precorrin-4 C11-methyltransferase	amet[c] + pre4[c] -> ahcys[c] + h[c] + pre5[c]	SCO1855	SCO1855		Cofactor and Prosthetic Group Biosynthesis	0	0	1000	0	2	2.1.1.133	Aerobic adenosylcobalamin biosynthetic pathway
PC17M	precorrin-3B C17-methyltransferase	amet[c] + pre3b[c] -> ahcys[c] + 3 h[c] + pre4[c]	SCO1857	SCO1857		Cofactor and Prosthetic Group Biosynthesis	0	0	1000	0	2	2.1.1.131	Aerobic adenosylcobalamin biosynthetic pathway
PC20M	precorrin-2 C20-methyltransferase	amet[c] + dscl[c] -> ahcys[c] + h[c] + pre3a[c]	SCO1853	SCO1853	cobI	Cofactor and Prosthetic Group Biosynthesis	0	0	1000	0	2	2.1.1.130	Aerobic adenosylcobalamin biosynthetic pathway
PC3BS	precorrin-3B synthase	h[c] + 0.5 o2[c] + pre3a[c] -> pre3b[c]				Cofactor and Prosthetic Group Biosynthesis	0	0	1000	0	1		Required for growth (adenosylcobalamin biosynthesis), Aerobic adenosylcobalamin biosynthetic pathway, BiGG database reaction name : R05217
PC6AR	precorrin-6A reductase	h[c] + nadph[c] + pre6a[c] -> nadp[c] + pre6b[c]	SCO3283	SCO3283		Cofactor and Prosthetic Group Biosynthesis	0	0	1000	0	2	1.3.1.54	Aerobic adenosylcobalamin biosynthetic pathway
PC6AS	precorrin-6A synthase	amet[c] + h2o[c] + pre5[c] -> ac[c] + ahcys[c] + h[c] + pre6a[c]	SCO6971	SCO6971		Cofactor and Prosthetic Group Biosynthesis	0	0	1000	0	2		Aerobic adenosylcobalamin biosynthetic pathway, BiGG database reaction name : R05219
PC6YM	precorrin-6Y C5,15-methyltransferase (decarboxylating)	2 amet[c] + pre6b[c] -> 2 ahcys[c] + co2[c] + 2 h[c] + pre8[c]	(SCO1555 or SCO1856)	SCO1555 SCO1856		Cofactor and Prosthetic Group Biosynthesis	0	0	1000	0	2	2.1.1.132	Aerobic adenosylcobalamin biosynthetic pathway
PC8XM	precorrin-8X methylmutase	h[c] + pre8[c] -> hgbyr[c]	SCO3282	SCO3282	cobH	Cofactor and Prosthetic Group Biosynthesis	0	0	1000	0	2	5.4.1.2	Aerobic adenosylcobalamin biosynthetic pathway
PCPpdsredO	peptidyl-carrier-protein phosphodiesterase (redO)	PCPredO[c] + h2o[c] -> apoPCPredO[c] + h[c] + pan4p[c]	SCO0046	SCO0046		Cofactor and Prosthetic Group Biosynthesis	0	0	1000	0	2	3.1.4.14
PCPSredO	peptidyl-carrier protein synthase (redO)	apoPCPredO[c] + coa[c] -> PCPredO[c] + h[c] + pap[c]	SCO5883	SCO5883	redU	Cofactor and Prosthetic Group Biosynthesis	0	0	1000	0	3	2.7.8.7		Stanley AE, Walton LJ, Kourdi Zerikly M, Corre C, Challis GL.#2006#Elucidation of the Streptomyces coelicolor pathway to 4-methoxy-2,2'-bipyrrole-5-carboxaldehyde, an intermediate in prodiginine biosynthesis.#Chem Commun (Camb).#14#3981-3983#
PDX5POi	pyridoxine 5'-phosphate oxidase	o2[c] + pdx5p[c] -> h2o2[c] + pydx5p[c]	(SCO4387 or SCO4418)	SCO4387 SCO4418		Cofactor and Prosthetic Group Biosynthesis	0	0	1000	0	2	1.4.3.5
PENTT	trans-pentaprenyltranstransferase	ppdp[c] + ipdp[c] -> hexdp[c] + ppi[c]	SCO4583	SCO4583		Cofactor and Prosthetic Group Biosynthesis	0	0	1000	0	2	2.5.1.33
PMDPHT	pyrimidine phosphatase	5aprbu[c] + h2o[c] -> 4r5au[c] + pi[c]				Cofactor and Prosthetic Group Biosynthesis	0	0	1000	0	1		Required for growth (riboflavin biosynthesis)
PMEACPE	Pimeloyl-[ACP] methyl ester esterase	h2o[c] + pmeACP[c] -> meoh[c] + pimACP[c]				Cofactor and Prosthetic Group Biosynthesis	0	0	1000	0	1		Required for growth (biotin biosynthesis)
PMPK	phosphomethylpyrimidine kinase	4ampm[c] + atp[c] -> 2mahmp[c] + adp[c]	SCO5563	SCO5563	thiD	Cofactor and Prosthetic Group Biosynthesis	0	0	1000	0	2	2.7.4.7
PNTK	pantothenate kinase	atp[c] + pnto-R[c] -> 4ppan[c] + adp[c] + h[c]	(SCO3380 or SCO4738)	SCO3380 SCO4738	coaA	Cofactor and Prosthetic Group Biosynthesis	0	0	1000	0	2	2.7.1.33
PPBNGS	porphobilinogen synthase	2 5aop[c] -> h[c] + 2 h2o[c] + ppbng[c]	SCO3311	SCO3311	hemB	Cofactor and Prosthetic Group Biosynthesis	0	0	1000	0	2	4.2.1.24
PPCDC	phosphopantothenoylcysteine decarboxylase	4ppcys[c] + h[c] -> co2[c] + pan4p[c]	SCO1477	SCO1477		Cofactor and Prosthetic Group Biosynthesis	0	0	1000	0	2	4.1.1.36
PPGPPDP	guanosine-3',5'-bis(diphosphate) 3'-diphosphatase	h2o[c] + ppgpp[c] -> gdp[c] + ppi[c]	(SCO1513 or SCO5794)	SCO1513 SCO5794	relA rshA	Cofactor and Prosthetic Group Biosynthesis	0	0	1000	0	3	3.1.7.2		Ryu YG, Kim ES, Kim DW, Kim SK, Lee KJ.#2007#Differential stringent responses of Streptomyces coelicolor M600 to starvation of specific nutrients.#J Microbiol Biotechnol.#17#305-312#
PPNCL2	phosphopantothenate-cysteine ligase	4ppan[c] + ctp[c] + cys-L[c] -> 4ppcys[c] + cmp[c] + h[c] + ppi[c]	SCO1477	SCO1477		Cofactor and Prosthetic Group Biosynthesis	0	0	1000	0	2	6.3.2.5
PPPGO	protoporphyrinogen oxidase (aerobic)	1.5 o2[c] + pppg9[c] -> 3 h2o[c] + ppp9[c]	SCO6041	SCO6041		Cofactor and Prosthetic Group Biosynthesis	0	0	1000	0	2	1.3.3.4
PTPATi	pantetheine-phosphate adenylyltransferase	atp[c] + h[c] + pan4p[c] -> dpcoa[c] + ppi[c]	SCO5568	SCO5568	coaD	Cofactor and Prosthetic Group Biosynthesis	0	0	1000	0	2	2.7.7.3
PYAM5PO	pyridoxamine 5'-phosphate oxidase	h2o[c] + o2[c] + pyam5p[c] -> h2o2[c] + nh4[c] + pydx5p[c]	(SCO4387 or SCO4418)	SCO4387 SCO4418		Cofactor and Prosthetic Group Biosynthesis	0	0	1000	0	2	1.4.3.5
PYDAMK	pyridoxamine kinase	atp[c] + pydam[c] -> adp[c] + h[c] + pyam5p[c]				Cofactor and Prosthetic Group Biosynthesis	0	0	1000	0	1	2.7.1.35	To utilize extracellular pyridoxamine
PYDXK	pyridoxal kinase	atp[c] + pydx[c] -> adp[c] + h[c] + pydx5p[c]				Cofactor and Prosthetic Group Biosynthesis	0	0	1000	0	1	2.7.1.35	To utilize extracellular pyridoxal
PYDXNK	pyridoxine kinase	atp[c] + pydxn[c] -> adp[c] + h[c] + pdx5p[c]				Cofactor and Prosthetic Group Biosynthesis	0	0	1000	0	1	2.7.1.35	To utilize extracellular pyridoxine
PYDXPS	Pyridoxal 5-phosphate synthase	ru5p-D[c] + dhap[c] + gln-L[c] -> pydx5p[c] + glu-L[c] + 3 h2o[c] + pi[c] + h[c]	(SCO1522 and SCO1523)	SCO1522 SCO1523	pdxT pdxS	Cofactor and Prosthetic Group Biosynthesis	0	0	1000	0	2			$Mycobacterium tuberculosis#Dick T, Manjunatha U, Kappes B, Gengenbacher M.#2010#Vitamin B6 biosynthesis is essential for survival and virulence of Mycobacterium tuberculosis.#Mol Microbiol.#78#980-988#
QULNS	quinolinate synthase	dhap[c] + iasp[c] -> 2 h2o[c] + pi[c] + quln[c]	SCO2162	SCO2162	nadA	Cofactor and Prosthetic Group Biosynthesis	0	0	1000	0	2
RBFK	riboflavin kinase	atp[c] + ribflv[c] -> adp[c] + fmn[c] + h[c]	SCO5711	SCO5711		Cofactor and Prosthetic Group Biosynthesis	0	0	1000	0	2	2.7.1.26
RBFSa	riboflavin synthase	4r5au[c] + db4p[c] -> dmlz[c] + 2 h2o[c] + pi[c]	SCO1440	SCO1440	ribH	Cofactor and Prosthetic Group Biosynthesis	0	0	1000	0	2	2.5.1.9
RBFSb	riboflavin synthase	2 dmlz[c] -> 4r5au[c] + ribflv[c]	SCO1443	SCO1443		Cofactor and Prosthetic Group Biosynthesis	0	0	1000	0	2	2.5.1.9
RZ5PP	alpha-ribazole 5-phosphate phosphatase	5prdmbz[c] + h2o[c] -> pi[c] + rdmbzi[c]				Cofactor and Prosthetic Group Biosynthesis	0	0	1000	0	1		Required for growth (adenosylcobalamin biosynthesis)
S2FE2SR	SUF [2Fe-2S] regeneration	2fe1s[c] + atp[c] + h2o[c] + sufbcd[c] + sufsesh[c] -> adp[c] + 5 h[c] + pi[c] + sufbcd-2fe2s[c] + sufse[c]	(SCO1925 and SCO1922 and SCO1924 and SCO1921)	SCO1925 SCO1922 SCO1924 SCO1921	sufB sufC sufD sufS	Cofactor and Prosthetic Group Biosynthesis	0	0	1000	0	2			den Hengst CD, Buttner MJ.#2008#Redox control in actinobacteria.#Biochim Biophys Acta.#1780#1201-1216#
S2FE2SS	SUF [2Fe-2S] Synthesis	atp[c] + fadh2[c] + 2 fe2[c] + h2o[c] + sufbcd[c] + 2 sufsesh[c] -> adp[c] + fad[c] + 7 h[c] + pi[c] + sufbcd-2fe2s[c] + 2 sufse[c]	(SCO1925 and SCO1922 and SCO1924 and SCO1921)	SCO1925 SCO1922 SCO1924 SCO1921	sufB sufC sufD sufS	Cofactor and Prosthetic Group Biosynthesis	0	0	1000	0	2			den Hengst CD, Buttner MJ.#2008#Redox control in actinobacteria.#Biochim Biophys Acta.#1780#1201-1216#
S2FE2SS2	SUF [2Fe-2S] Synthesis II	atp[c] + fadh2[c] + 2 fe2[c] + h2o[c] + sufbcd-2fe2s[c] + 2 sufsesh[c] -> adp[c] + fad[c] + 7 h[c] + pi[c] + sufbcd-2fe2s2[c] + 2 sufse[c]	(SCO1925 and SCO1922 and SCO1924 and SCO1921)	SCO1925 SCO1922 SCO1924 SCO1921	sufB sufC sufD sufS	Cofactor and Prosthetic Group Biosynthesis	0	0	1000	0	2			den Hengst CD, Buttner MJ.#2008#Redox control in actinobacteria.#Biochim Biophys Acta.#1780#1201-1216#
S2FE2ST	SUF [2Fe-2S] Transfer	4 h[c] + sufbcd-2fe2s[c] -> 2fe2s[c] + sufbcd[c]	(SCO1925 and SCO1922 and SCO1924)	SCO1925 SCO1922 SCO1924	sufB sufC sufD	Cofactor and Prosthetic Group Biosynthesis	0	0	1000	0	2			den Hengst CD, Buttner MJ.#2008#Redox control in actinobacteria.#Biochim Biophys Acta.#1780#1201-1216#
S4FE4SR	SUF [4Fe-4S] Reduction	fadh2[c] + 2 h[c] + sufbcd-2fe2s2[c] -> fad[c] + sufbcd-4fe4s[c]	(SCO1925 and SCO1922 and SCO1924)	SCO1925 SCO1922 SCO1924	sufB sufC sufD	Cofactor and Prosthetic Group Biosynthesis	0	0	1000	0	2			den Hengst CD, Buttner MJ.#2008#Redox control in actinobacteria.#Biochim Biophys Acta.#1780#1201-1216#
S4FE4ST	SUF [4Fe-4S] Transfer	4 h[c] + sufbcd-4fe4s[c] -> 4fe4s[c] + sufbcd[c]	(SCO1925 and SCO1922 and SCO1924)	SCO1925 SCO1922 SCO1924	sufB sufC sufD	Cofactor and Prosthetic Group Biosynthesis	0	0	1000	0	2			den Hengst CD, Buttner MJ.#2008#Redox control in actinobacteria.#Biochim Biophys Acta.#1780#1201-1216#
SCYSDS	SUF Cysteine desulfuration	cys-L[c] + sufse[c] -> ala-L[c] + sufsesh[c]	SCO1921	SCO1921	sufS	Cofactor and Prosthetic Group Biosynthesis	0	0	1000	0	2			den Hengst CD, Buttner MJ.#2008#Redox control in actinobacteria.#Biochim Biophys Acta.#1780#1201-1216#
SHCHCC	sirohydrochlorin cobaltochelatase	cobalt2[c] + dscl[c] -> copre2[c] + 3 h[c]	SCO1858	SCO1858		Cofactor and Prosthetic Group Biosynthesis	0	0	1000	0	2		Anaerobic adenosylcobalamin biosynthetic pathway (incomplete)
SHCHD2	sirohydrochlorin dehydrogenase (NAD)	dscl[c] + nad[c] -> h[c] + nadh[c] + scl[c]	SCO1553	SCO1553		Cofactor and Prosthetic Group Biosynthesis	0	0	1000	0	2
SHCHF	sirohydrochlorin ferrochelatase	fe2[c] + scl[c] -> 3 h[c] + sheme[c]	SCO1553	SCO1553		Cofactor and Prosthetic Group Biosynthesis	0	0	1000	0	2
THRPD	threonine-phosphate decarboxylase	h[c] + thrp[c] -> applp[c] + co2[c]				Cofactor and Prosthetic Group Biosynthesis	0	0	1000	0	1	4.1.1.81	Required for growth (adenosylcobalamin biosynthesis)
THRPS	threonine-phosphate synthase	atp[c] + thr-L[c] -> adp[c] + h[c] + thrp[c]				Cofactor and Prosthetic Group Biosynthesis	0	0	1000	0	1	2.7.1.177	Required for growth (adenosylcobalamin biosynthesis)
THZPSN3	thiazole phosphate synthesis	atp[c] + dhgly[c] + dxyl5p[c] + h[c] + iscssh[c] + nadph[c] -> 4mpetz[c] + amp[c] + co2[c] + 2 h2o[c] + iscs[c] + nadp[c] + ppi[c]	(SCO5486 and SCO2108)	SCO5486 SCO2108		Cofactor and Prosthetic Group Biosynthesis	0	0	1000	0	2
TMK	thiamine kinase	atp[c] + thm[c] -> adp[c] + h[c] + thmmp[c]				Cofactor and Prosthetic Group Biosynthesis	0	0	1000	0	1	2.7.1.89	To utilize extracellular thiamine
TMPK	thiamine-phosphate kinase	atp[c] + thmmp[c] -> adp[c] + thmpp[c]	SCO5562	SCO5562	thiL	Cofactor and Prosthetic Group Biosynthesis	0	0	1000	0	2	2.7.4.16
TMPPP	thiamine-phosphate diphosphorylase	2mahmp[c] + 4mpetz[c] + h[c] -> ppi[c] + thmmp[c]	SCO2104	SCO2104	thiE	Cofactor and Prosthetic Group Biosynthesis	0	0	1000	0	2	2.5.1.3
TYRL	tyrosine lyase	amet[c] + nadph[c] + tyr-L[c] -> 4crsol[c] + dad-5[c] + dhgly[c] + h[c] + met-L[c] + nadp[c]	SCO2109	SCO2109	thiG	Cofactor and Prosthetic Group Biosynthesis	0	0	1000	0	2
UDCPDPS	Undecaprenyl diphosphate synthase	frdp[c] + 8 ipdp[c] -> 8 ppi[c] + udcpdp[c]	SCO2509	SCO2509	uppS	Cofactor and Prosthetic Group Biosynthesis	0	0	1000	0	2
UPP3MT	uroporphyrinogen methyltransferase	2 amet[c] + uppg3[c] -> 2 ahcys[c] + dscl[c] + h[c]	(SCO1553 or SCO3317)	SCO1553 SCO3317		Cofactor and Prosthetic Group Biosynthesis	0	0	1000	0	2	2.1.1.107
UPP3S	uroporphyrinogen-III synthase	hmbil[c] -> h2o[c] + uppg3[c]	SCO3317	SCO3317		Cofactor and Prosthetic Group Biosynthesis	0	0	1000	0	2	4.2.1.75
UPPDC1	uroporphyrinogen decarboxylase (uroporphyrinogen III)	4 h[c] + uppg3[c] -> 4 co2[c] + cpppg3[c]	SCO6031	SCO6031	hemE	Cofactor and Prosthetic Group Biosynthesis	0	0	1000	0	2	4.1.1.37
WCOS	tungsten pterin cofactor synthase	2 h[c] + mptamp[c] + tungs[c] -> amp[c] + cu2[c] + h2o[c] + wco[c]	(SCO3181 or SCO3827)	SCO3181 SCO3827	moeA	Cofactor and Prosthetic Group Biosynthesis	0	0	1000	0	2
ADSK	adenylyl-sulfate kinase	aps[c] + atp[c] -> adp[c] + h[c] + paps[c]	SCO6099	SCO6099	cysC	Cysteine Metabolism	0	0	1000	0	2	2.7.1.25
AMPTASECG	alanyl aminopeptidase (cys-gly)	cgly[c] + h2o[c] -> cys-L[c] + gly[c]	(SCO2018 or SCO2635 or SCO2643)	SCO2018 SCO2635 SCO2643	pepN	Cysteine Metabolism	0	0	1000	0	2	3.4.11.2
BPNT	3',5'-bisphosphate nucleotidase	h2o[c] + pap[c] -> amp[c] + pi[c]				Cysteine Metabolism	0	0	1000	0	1	3.1.3.7	Required for growth (acyl-carrier protein biosynthesis)
CYSDS	Cysteine Desulfhydrase	cys-L[c] + h2o[c] -> h2s[c] + nh4[c] + pyr[c]	(SCO0435 or SCO0731 or SCO3920)	SCO0435 SCO0731 SCO3920	malY cysA	Cysteine Metabolism	0	0	1000	0	2	4.1.99.1
CYSS	cysteine synthase	acser[c] + h2s[c] -> ac[c] + cys-L[c] + h[c]	(SCO0992 or SCO1028 or SCO2910)	SCO0992 SCO1028 SCO2910	cysM	Cysteine Metabolism	0	0	1000	0	2	2.5.1.47
CYSTGL	cystathionine g-lyase	cyst-L[c] + h2o[c] -> 2obut[c] + cys-L[c] + nh4[c]	SCO3920	SCO3920	cysA	Cysteine Metabolism	0	0	1000	0	2	4.4.1.1
CYSTS	cystathionine beta-synthase	hcys-L[c] + ser-L[c] -> cyst-L[c] + h2o[c]	SCO3077	SCO3077		Cysteine Metabolism	0	0	1000	0	2	4.2.1.22
PAPSR	phosphoadenylyl-sulfate reductase (thioredoxin)	paps[c] + trdrd[c] -> 2 h[c] + pap[c] + so3[c] + trdox[c]	(SCO6100 and (SCO0885 or SCO3889 or SCO5419 or SCO5438))	SCO6100 SCO0885 SCO3889 SCO5419 SCO5438	cysH trxA3 trxA trxA4 trxA2	Cysteine Metabolism	0	0	1000	0	2	1.8.4.8
PAPSR3	phosphoadenylyl-sulfate reductase (mycothiol)	2 msh[c] + paps[c] -> mssg[c] + 2 h[c] + pap[c] + so3[c]	SCO6100	SCO6100	cysH	Cysteine Metabolism	0	0	1000	0	2	1.8.4.8	Assumed that mycothiol do the same biological roles as glutathione
SADT2	Sulfate adenyltransferase	atp[c] + gtp[c] + h2o[c] + so4[c] -> aps[c] + gdp[c] + pi[c] + ppi[c]	(SCO6097 and SCO6098)	SCO6097 SCO6098	cysN cysD	Cysteine Metabolism	0	0	1000	0	2
SULRi	sulfite reductase (NADPH2)	5 h[c] + 3 nadph[c] + so3[c] -> 3 h2o[c] + h2s[c] + 3 nadp[c]	SCO6102	SCO6102	sirA	Cysteine Metabolism	0	0	1000	0	3	1.8.2.2		Fischer M, Schmidt C, Falke D, Sawers RG.#2012#Terminal reduction reactions of nitrate and sulfate assimilation in Streptomyces coelicolor A3(2): identification of genes encoding nitrite and sulfite reductases.#Res Microbiol.#163#340-348#
DABAACT	L-2,4-diaminobutyrate acetyltransferase	accoa[c] + 24dab[c] -> coa[c] + nac24dab[c]	SCO1864	SCO1864		Ectoine Biosynthesis	0	0	1000	0	2	2.3.1.178
DABAAT	DABA aminotransferase	24dab[c] + akg[c] + h[c] <=> aspsa[c] + glu-L[c]	(SCO1865 or SCO5799)	SCO1865 SCO5799		Ectoine Biosynthesis	1	-1000	1000	0	2	2.6.1.76
ECTH	Ectoine hydroxylase	ectoine-L[c] + h[c] + nadh[c] + o2[c] -> 5hectoine[c] + h2o[c] + nad[c]	SCO1867	SCO1867	ectD	Ectoine Biosynthesis	0	0	1000	0	2
ECTS	L-ectoine synthase	nac24dab[c] -> ectoine-L[c] + h2o[c] + h[c]	SCO1866	SCO1866		Ectoine Biosynthesis	0	0	1000	0	2	4.2.1.108
Biomass_SCO	S. coelicolor biomass objective function - with 75.7 GAM estimate	0.60978 ala-L[c] + 0.10195 arg-L[c] + 0.18343 asn-L[c] + 0.18599 asp-L[c] + 0.08069 cys-L[c] + 0.25085 glu-L[c] + 0.1418 gln-L[c] + 0.55317 gly[c] + 0.07991 his-L[c] + 0.24831 ile-L[c] + 0.13981 leu-L[c] + 0.0708 lys-L[c] + 0.12059 met-L[c] + 0.13521 phe-L[c] + 0.37332 pro-L[c] + 0.21339 ser-L[c] + 0.26691 thr-L[c] + 0.03275 trp-L[c] + 0.06539 tyr-L[c] + 0.22152 val-L[c] + 0.016297 datp[c] + 0.04…				Exchange	0	0	1000	1	1
DM_2HYMEPH	Sink needed to allow 2-(Hydroxymethyl)phenol to leave system	2hymeph[c] ->				Exchange	0	0	1000	0	1		Required for growth using salicin as a carbon source
DM_4CRSOL	Sink needed to allow p-Cresol to leave system	4crsol[c] ->				Exchange	0	0	1000	0	1
DM_5DRIB	Sink needed to allow 5'-deoxyribose to leave system	5drib[c] ->				Exchange	0	0	1000	0	1		Required for growth (biotin biosynthesis)
DM_AACALD	Sink needed to allow aminoacetaldehyde to leave system	aacald[c] ->				Exchange	0	0	1000	0	1
DM_ACONM	Sink needed to allow trans-aconitate-2-methyl ester to leave system (oxidative stress)	aconm[c] ->				Exchange	0	0	1000	0	1
DM_ACT	Sink needed to allow intracellular actinorhodin to leave system	ACT[c] ->				Exchange	0	0	1000	0	1
DM_AMOB	Sink needed to allow S-Adenosyl-4-methylthio-2-oxobutanoate to leave system	amob[c] ->				Exchange	0	0	1000	0	1
DM_DALUA	Sink needed to allow dialuric acid to leave system	dalua[c] ->				Exchange	0	0	1000	0	1
DM_ECTOINE	Sink needed to allow L-ectoine to leave system (osmotic stress)	ectoine-L[c] ->				Exchange	0	0	1000	0	1		To impose osmotic stress condition
DM_GERMA	Sink needed to allow intracellular germicidin A to leave system	germicidinA[c] ->				Exchange	0	0	1000	0	1
DM_GERMB	Sink needed to allow intracellular germicidin B to leave system	germicidinB[c] ->				Exchange	0	0	1000	0	1
DM_GERMC	Sink needed to allow intracellular germicidin C to leave system	germicidinC[c] ->				Exchange	0	0	1000	0	1
DM_GERMD	Sink needed to allow intracellular germicidin D to leave system	germicidinD[c] ->				Exchange	0	0	1000	0	1
DM_MSH	Sink needed to allow mycothiol to leave system (oxidative stress)	msh[c] ->				Exchange	0	0	1000	0	1		To impose oxdative stress condition
DM_RED	Sink needed to allow intracellular undecylprodigiosin to leave system	RED[c] ->				Exchange	0	0	1000	0	1
EX_14glucan(e)	1,4-alpha-D-glucan exchange	14glucan[e] <=>				Exchange	1	0	1000	0	1
EX_15dap(e)	1,5-Diaminopentane exchange	15dap[e] <=>				Exchange	1	0	1000	0	1		Required to secrete cadaverine
EX_1Dgali(e)	1-alpha-D-Galactosyl-myo-inositol exchange	1Dgali[e] <=>				Exchange	1	0	1000	0	1		Required for growth using 1-alpha-D-Galactosyl-myo-inositol as a carbon source
EX_23camp(e)	2',3'-Cyclic AMP exchange	23camp[e] <=>				Exchange	1	0	1000	0	1
EX_23ccmp(e)	2',3'-Cyclic CMP exchange	23ccmp[e] <=>				Exchange	1	0	1000	0	1
EX_23cgmp(e)	2',3'-Cyclic GMP exchange	23cgmp[e] <=>				Exchange	1	0	1000	0	1
EX_23cump(e)	2',3'-Cyclic UMP exchange	23cump[e] <=>				Exchange	1	0	1000	0	1
EX_26dap-M(e)	meso-2,6-Diaminoheptanedioate exchange	26dap-M[e] <=>				Exchange	1	0	1000	0	1		Required for growth using M-diaminopimelic acid as a carbon source
EX_2ddglcn(e)	2-Dehydro-3-deoxy-D-gluconate exchange	2ddglcn[e] <=>				Exchange	1	0	1000	0	1		To utilize 2-dehydro-3-deoxy-D-gluconate
EX_3amp(e)	3'-AMP exchange	3amp[e] <=>				Exchange	1	0	1000	0	1
EX_3cmp(e)	3'-cmp exchange	3cmp[e] <=>				Exchange	1	0	1000	0	1
EX_3gmp(e)	3'-GMP exchange	3gmp[e] <=>				Exchange	1	0	1000	0	1
EX_3ump(e)	3'-UMP exchange	3ump[e] <=>				Exchange	1	0	1000	0	1
EX_4abut(e)	4-Aminobutanoate exchange	4abut[e] <=>				Exchange	1	0	1000	0	1
EX_5dglcn(e)	5-Dehydro-D-gluconate exchange	5dglcn[e] <=>				Exchange	1	0	1000	0	1
EX_5mtr(e)	5-Methylthio-D-ribose exchange	5mtr[e] <=>				Exchange	1	0	1000	0	1		Required for growth (spermidine, spermine biosynthesis)
EX_abt-D(e)	D-arabinitol transport via ABC system	abt-D[e] <=>				Exchange	1	0	1000	0	1		Required for growth using D-arabitol as a carbon source
EX_ac(e)	Acetate exchange	ac[e] <=>				Exchange	1	0	1000	0	1
EX_acald(e)	Acetaldehyde exchange	acald[e] <=>				Exchange	1	0	1000	0	1
EX_acgam(e)	N-Acetyl-D-glucosamine exchange	acgam[e] <=>				Exchange	1	0	1000	0	1
EX_acser(e)	O-Acetyl-L-serine exchange	acser[e] <=>				Exchange	1	0	1000	0	1
EX_ade(e)	Adenine exchange	ade[e] <=>				Exchange	1	0	1000	0	1
EX_adn(e)	Adenosine exchange	adn[e] <=>				Exchange	1	0	1000	0	1
EX_agm(e)	Agmatine exchange	agm[e] <=>				Exchange	1	0	1000	0	1
EX_akg(e)	2-Oxoglutarate exchange	akg[e] <=>				Exchange	1	0	1000	0	1
EX_alaala(e)	D-Alanyl-D-alanine exchange	alaala[e] <=>				Exchange	1	0	1000	0	1
EX_ala-B(e)	beta-Alanine exchange	ala-B[e] <=>				Exchange	1	0	1000	0	1
EX_ala-D(e)	D-Alanine exchange	ala-D[e] <=>				Exchange	1	0	1000	0	1
EX_ala-L(e)	L-Alanine exchange	ala-L[e] <=>				Exchange	1	0	1000	0	1
EX_alltn(e)	Allantoin exchange	alltn[e] <=>				Exchange	1	0	1000	0	1
EX_amp(e)	AMP exchange	amp[e] <=>				Exchange	1	0	1000	0	1
EX_arab-L(e)	L-Arabinose exchange	arab-L[e] <=>				Exchange	1	0	1000	0	1
EX_arg-L(e)	L-Arginine exchange	arg-L[e] <=>				Exchange	1	0	1000	0	1
EX_asn-L(e)	L-Asparagine exchange	asn-L[e] <=>				Exchange	1	0	1000	0	1
EX_aso3(e)	arsenite exchange	aso3[e] <=>				Exchange	1	0	1000	0	1
EX_asp-L(e)	L-Aspartate exchange	asp-L[e] <=>				Exchange	1	0	1000	0	1
EX_bhb(e)	(R)-3-Hydroxybutanoate exchange	bhb[e] <=>				Exchange	1	0	1000	0	1		Required for growth using (R)-3-Hydroxybutanoate as a carbon source
EX_btn(e)	Biotin exchange	btn[e] <=>				Exchange	1	0	1000	0	1
EX_ca2(e)	Calcium exchange	ca2[e] <=>				Exchange	1	-1000	1000	0	1
EX_cbi(e)	Cobinamide exchange	cbi[e] <=>				Exchange	1	0	1000	0	1		To utilize extracellular cobinamide
EX_cbl1(e)	Cob(I)alamin exchange	cbl1[e] <=>				Exchange	1	0	1000	0	1		To utilize extracellular cob(1)alamin
EX_cd2(e)	Cadmium exchange	cd2[e] <=>				Exchange	1	0	1000	0	1
EX_CDA(e)	calcium-dependent antibiotics 2b exchange	CDA[e] <=>				Exchange	1	0	1000	0	1
EX_celb(e)	cellobiose exchange	celb[e] <=>				Exchange	1	0	1000	0	1
EX_chol(e)	Choline exchange	chol[e] <=>				Exchange	1	0	1000	0	1
EX_chtbs(e)	chitobiose exchange	chtbs[e] <=>				Exchange	1	0	1000	0	1
EX_cit(e)	Citrate exchange	cit[e] <=>				Exchange	1	0	1000	0	1
EX_cl(e)	Chloride exchange	cl[e] <=>				Exchange	1	-1000	1000	0	1
EX_cmp(e)	CMP exchange	cmp[e] <=>				Exchange	1	0	1000	0	1
EX_co2(e)	CO2 exchange	co2[e] <=>				Exchange	1	-1000	1000	0	1
EX_cobalt2(e)	Co2+ exchange	cobalt2[e] <=>				Exchange	1	-1000	1000	0	1
EX_coelichelin(e)	coelichelin exchange	coelichelin[e] <=>				Exchange	1	0	1000	0	1
EX_csn(e)	Cytosine exchange	csn[e] <=>				Exchange	1	0	1000	0	1
EX_cu(e)	Cu+ exchange	cu[e] <=>				Exchange	1	0	1000	0	1
EX_cu2(e)	Cu2+ exchange	cu2[e] <=>				Exchange	1	-1000	1000	0	1
EX_cys-L(e)	L-Cysteine exchange	cys-L[e] <=>				Exchange	1	0	1000	0	1
EX_cytd(e)	Cytidine exchange	cytd[e] <=>				Exchange	1	0	1000	0	1
EX_dad-2(e)	Deoxyadenosine exchange	dad-2[e] <=>				Exchange	1	0	1000	0	1
EX_damp(e)	dAMP exchange	damp[e] <=>				Exchange	1	0	1000	0	1
EX_dcmp(e)	dCMP exchange	dcmp[e] <=>				Exchange	1	0	1000	0	1
EX_dcyt(e)	Deoxycytidine exchange	dcyt[e] <=>				Exchange	1	0	1000	0	1
EX_desferrioxamB(e)	desferrioxamine B exchange	desferrioxamB[e] <=>				Exchange	1	0	1000	0	1
EX_desferrioxamE(e)	desferrioxamine E exchange	desferrioxamE[e] <=>				Exchange	1	0	1000	0	1
EX_dgmp(e)	dGMP exchange	dgmp[e] <=>				Exchange	1	0	1000	0	1
EX_dgsn(e)	Deoxyguanosine exchange	dgsn[e] <=>				Exchange	1	0	1000	0	1
EX_dha(e)	Dihydroxyacetone exchange	dha[e] <=>				Exchange	1	0	1000	0	1
EX_dimp(e)	dIMP exchange	dimp[e] <=>				Exchange	1	0	1000	0	1
EX_din(e)	Deoxyinosine exchange	din[e] <=>				Exchange	1	0	1000	0	1
EX_drib(e)	Deoxyribose exchange	drib[e] <=>				Exchange	1	0	1000	0	1		Required for growth using deoxyribose as a carbon source
EX_dtmp(e)	dTMP exchange	dtmp[e] <=>				Exchange	1	0	1000	0	1
EX_dump(e)	dUMP exchange	dump[e] <=>				Exchange	1	0	1000	0	1
EX_duri(e)	Deoxyuridine exchange	duri[e] <=>				Exchange	1	0	1000	0	1
EX_epm(e)	epimelibiose exchange	epm[e] <=>				Exchange	1	0	1000	0	1		Required for growth using epimelibiose as a carbon source
EX_etha(e)	Ethanolamine exchange	etha[e] <=>				Exchange	1	0	1000	0	1
EX_etoh(e)	Ethanol exchange	etoh[e] <=>				Exchange	1	0	1000	0	1
EX_fald(e)	Formaldehyde exchange	fald[e] <=>				Exchange	1	0	1000	0	1
EX_fe2(e)	Fe2+ exchange	fe2[e] <=>				Exchange	1	-1000	1000	0	1
EX_fe3(e)	Fe3+ exchange	fe3[e] <=>				Exchange	1	-1000	1000	0	1
EX_ferricoelichelin(e)	ferricoelichelin exchange	ferricoelichelin[e] <=>				Exchange	1	0	1000	0	1
EX_ferrioxamB(e)	ferrioxamine B exchange	ferrioxamB[e] <=>				Exchange	1	0	1000	0	1
EX_ferrioxamE(e)	ferrioxamine E exchange	ferrioxamE[e] <=>				Exchange	1	0	1000	0	1
EX_for(e)	Formate exchange	for[e] <=>				Exchange	1	0	1000	0	1
EX_fru(e)	D-Fructose exchange	fru[e] <=>				Exchange	1	0	1000	0	1
EX_fum(e)	Fumarate exchange	fum[e] <=>				Exchange	1	0	1000	0	1
EX_g3pc(e)	sn-Glycero-3-phosphocholine exchange	g3pc[e] <=>				Exchange	1	0	1000	0	1
EX_g3pe(e)	sn-Glycero-3-phosphoethanolamine exchange	g3pe[e] <=>				Exchange	1	0	1000	0	1
EX_g3pg(e)	Glycerophosphoglycerol exchange	g3pg[e] <=>				Exchange	1	0	1000	0	1
EX_g3pi(e)	sn-Glycero-3-phospho-1-inositol exchange	g3pi[e] <=>				Exchange	1	0	1000	0	1
EX_g3ps(e)	Glycerophosphoserine exchange	g3ps[e] <=>				Exchange	1	0	1000	0	1
EX_gACT(e)	gamma-actinorhodin exchange	gACT[e] <=>				Exchange	1	0	1000	0	1
EX_gal(e)	D-Galactose exchange	gal[e] <=>				Exchange	1	0	1000	0	1
EX_galctn-D(e)	D-Galactonate exchange	galctn-D[e] <=>				Exchange	1	0	1000	0	1
EX_ggl(e)	galactosylglycerol exchange	ggl[e] <=>				Exchange	1	0	1000	0	1		Required for growth using galactosylglycerol as a carbon source
EX_glc(e)	D-Glucose exchange	glc-D[e] <=>				Exchange	1	-0.8	1000	0	1
EX_glcn(e)	D-Gluconate exchange	glcn[e] <=>				Exchange	1	0	1000	0	1
EX_glcr(e)	D-Glucarate exchange	glcr[e] <=>				Exchange	1	0	1000	0	1
EX_gln-L(e)	L-Glutamine exchange	gln-L[e] <=>				Exchange	1	0	1000	0	1
EX_glu-L(e)	L-Glutamate exchange	glu-L[e] <=>				Exchange	1	0	1000	0	1
EX_gly(e)	Glycine exchange	gly[e] <=>				Exchange	1	0	1000	0	1
EX_glyald(e)	D-Glyceraldehyde exchange	glyald[e] <=>				Exchange	1	0	1000	0	1
EX_glyb(e)	Glycine betaine exchange	glyb[e] <=>				Exchange	1	0	1000	0	1
EX_glyc(e)	Glycerol exchange	glyc[e] <=>				Exchange	1	0	1000	0	1
EX_glyc3p(e)	Glycerol 3-phosphate exchange	glyc3p[e] <=>				Exchange	1	0	1000	0	1
EX_glyclt(e)	Glycolate exchange	glyclt[e] <=>				Exchange	1	0	1000	0	1
EX_glyc-R(e)	(R)-Glycerate exchange	glyc-R[e] <=>				Exchange	1	0	1000	0	1
EX_gmp(e)	GMP exchange	gmp[e] <=>				Exchange	1	0	1000	0	1
EX_gsn(e)	Guanosine exchange	gsn[e] <=>				Exchange	1	0	1000	0	1
EX_gua(e)	Guanine exchange	gua[e] <=>				Exchange	1	0	1000	0	1
EX_h(e)	H+ exchange	h[e] <=>				Exchange	1	-1000	1000	0	1
EX_h2o(e)	H2O exchange	h2o[e] <=>				Exchange	1	-1000	1000	0	1
EX_h2o2(e)	Hydrogen peroxide exchange	h2o2[e] <=>				Exchange	1	0	1000	0	1
EX_h2s(e)	Hydrogen sulfide exchange	h2s[e] <=>				Exchange	1	0	1000	0	1
EX_his-L(e)	L-Histidine exchange	his-L[e] <=>				Exchange	1	0	1000	0	1
EX_hom-L(e)	L-Homoserine exchange	hom-L[e] <=>				Exchange	1	0	1000	0	1
EX_idon-L(e)	L-Idonate exchange	idon-L[e] <=>				Exchange	1	0	1000	0	1
EX_ile-L(e)	L-Isoleucine exchange	ile-L[e] <=>				Exchange	1	0	1000	0	1
EX_imp(e)	IMP exchange	imp[e] <=>				Exchange	1	0	1000	0	1
EX_indole(e)	Indole exchange	indole[e] <=>				Exchange	1	0	1000	0	1		Required for growth using L-tryptophan as a carbon source
EX_inost(e)	myo-Inositol exchange	inost[e] <=>				Exchange	1	0	1000	0	1
EX_ins(e)	Inosine exchange	ins[e] <=>				Exchange	1	0	1000	0	1
EX_k(e)	K+ exchange	k[e] <=>				Exchange	1	-1000	1000	0	1
EX_lac-D(e)	D-lactate exchange	lac-D[e] <=>				Exchange	1	0	1000	0	1
EX_lac-L(e)	L-Lactate exchange	lac-L[e] <=>				Exchange	1	0	1000	0	1
EX_LalaDglu(e)	L-alanine-D-glutamate exchange	LalaDglu[e] <=>				Exchange	1	0	1000	0	1
EX_lcts(e)	Lactose exchange	lcts[e] <=>				Exchange	1	0	1000	0	1
EX_leu-L(e)	L-Leucine exchange	leu-L[e] <=>				Exchange	1	0	1000	0	1
EX_lipoate(e)	Lipoate exchange	lipoate[e] <=>				Exchange	1	0	1000	0	1
EX_lys-L(e)	L-Lysine exchange	lys-L[e] <=>				Exchange	1	0	1000	0	1
EX_lyx-L(e)	L-Lyxose exchange	lyx-L[e] <=>				Exchange	1	0	1000	0	1
EX_mal-L(e)	L-Malate exchange	mal-L[e] <=>				Exchange	1	0	1000	0	1
EX_malt(e)	Maltose exchange	malt[e] <=>				Exchange	1	0	1000	0	1
EX_malthp(e)	Maltoheptaose exchange	malthp[e] <=>				Exchange	1	0	1000	0	1
EX_malthx(e)	Maltohexaose exchange	malthx[e] <=>				Exchange	1	0	1000	0	1
EX_maltpt(e)	Maltopentaose exchange	maltpt[e] <=>				Exchange	1	0	1000	0	1
EX_malttr(e)	Maltotriose exchange	malttr[e] <=>				Exchange	1	0	1000	0	1
EX_maltttr(e)	Maltotetraose exchange	maltttr[e] <=>				Exchange	1	0	1000	0	1
EX_man(e)	D-Mannose exchange	man[e] <=>				Exchange	1	0	1000	0	1
EX_melib(e)	Melibiose exchange	melib[e] <=>				Exchange	1	0	1000	0	1
EX_melt(e)	melibiitol exchange	melt[e] <=>				Exchange	1	0	1000	0	1		Required for growth using melibiitol as a carbon source
EX_meoh(e)	methanol exchange	meoh[e] <=>				Exchange	1	0	1000	0	1
EX_met-L(e)	L-Methionine exchange	met-L[e] <=>				Exchange	1	0	1000	0	1
EX_mg2(e)	Mg exchange	mg2[e] <=>				Exchange	1	-1000	1000	0	1
EX_mn2(e)	Mn2+ exchange	mn2[e] <=>				Exchange	1	-1000	1000	0	1
EX_mnl(e)	D-Mannitol exchange	mnl[e] <=>				Exchange	1	0	1000	0	1
EX_mobd(e)	Molybdate exchange	mobd[e] <=>				Exchange	1	-1000	1000	0	1
EX_n2o(e)	Nitrous oxide exchange	n2o[e] <=>				Exchange	1	0	1000	0	1
EX_na1(e)	Sodium exchange	na1[e] <=>				Exchange	1	-1000	1000	0	1
EX_nac(e)	Nicotinate exchange	nac[e] <=>				Exchange	1	0	1000	0	1
EX_nh4(e)	Ammonia exchange	nh4[e] <=>				Exchange	1	-1000	1000	0	1
EX_ni2(e)	Ni2+ exchange	ni2[e] <=>				Exchange	1	-1000	1000	0	1
EX_nmn(e)	NMN exchange	nmn[e] <=>				Exchange	1	0	1000	0	1
EX_no(e)	Nitric oxide exchange	no[e] <=>				Exchange	1	0	1000	0	1
EX_no2(e)	Nitrite exchange	no2[e] <=>				Exchange	1	0	1000	0	1
EX_no3(e)	Nitrate exchange	no3[e] <=>				Exchange	1	0	1000	0	1
EX_o2(e)	O2 exchange	o2[e] <=>				Exchange	1	-1000	1000	0	1
EX_orn(e)	Ornithine exchange	orn[e] <=>				Exchange	1	0	1000	0	1
EX_orot(e)	Orotate exchange	orot[e] <=>				Exchange	1	0	1000	0	1
EX_pacald(e)	Phenylacetaldehyde exchange	pacald[e] <=>				Exchange	1	0	1000	0	1
EX_phe-L(e)	L-Phenylalanine exchange	phe-L[e] <=>				Exchange	1	0	1000	0	1
EX_pi(e)	Phosphate exchange	pi[e] <=>				Exchange	1	-1000	1000	0	1
EX_pnto-R(e)	(R)-Pantothenate exchange	pnto-R[e] <=>				Exchange	1	0	1000	0	1
EX_ppa(e)	Propionate exchange	ppa[e] <=>				Exchange	1	0	1000	0	1
EX_pro-L(e)	L-Proline exchange	pro-L[e] <=>				Exchange	1	0	1000	0	1
EX_ptrc(e)	Putrescine exchange	ptrc[e] <=>				Exchange	1	0	1000	0	1
EX_pydam(e)	Pyridoxamine exchange	pydam[e] <=>				Exchange	1	0	1000	0	1
EX_pydx(e)	Pyridoxal exchange	pydx[e] <=>				Exchange	1	0	1000	0	1
EX_pydxn(e)	Pyridoxine exchange	pydxn[e] <=>				Exchange	1	0	1000	0	1
EX_pyr(e)	Pyruvate exchange	pyr[e] <=>				Exchange	1	0	1000	0	1
EX_raffin(e)	raffinose exchange	raffin[e] <=>				Exchange	1	0	1000	0	1		Required for growth using raffinose as a carbon source
EX_rib-D(e)	D-Ribose exchange	rib-D[e] <=>				Exchange	1	0	1000	0	1
EX_rmn(e)	L-Rhamnose exchange	rmn[e] <=>				Exchange	1	0	1000	0	1
EX_salcn(e)	Salicin exchange	salcn[e] <=>				Exchange	1	0	1000	0	1		Required for growth using salicin as a carbon source
EX_sbt-D(e)	D-Sorbitol exchange	sbt-D[e] <=>				Exchange	1	0	1000	0	1
EX_ser-L(e)	L-Serine exchange	ser-L[e] <=>				Exchange	1	0	1000	0	1
EX_skm(e)	Shikimate exchange	skm[e] <=>				Exchange	1	0	1000	0	1
EX_so4(e)	Sulfate exchange	so4[e] <=>				Exchange	1	-1000	1000	0	1
EX_spmd(e)	Spermidine exchange	spmd[e] <=>				Exchange	1	0	1000	0	1
EX_succ(e)	Succinate exchange	succ[e] <=>				Exchange	1	0	1000	0	1
EX_tartr-D(e)	D-tartrate exchange	tartr-D[e] <=>				Exchange	1	0	1000	0	1		Required for growth using D-tartrate as a carbon source
EX_taur(e)	Taurine exchange	taur[e] <=>				Exchange	1	0	1000	0	1
EX_thm(e)	Thiamin exchange	thm[e] <=>				Exchange	1	0	1000	0	1
EX_thr-L(e)	L-Threonine exchange	thr-L[e] <=>				Exchange	1	0	1000	0	1
EX_thym(e)	Thymine exchange	thym[e] <=>				Exchange	1	0	1000	0	1
EX_thymd(e)	Thymidine exchange	thymd[e] <=>				Exchange	1	0	1000	0	1
EX_tre(e)	Trehalose exchange	tre[e] <=>				Exchange	1	0	1000	0	1
EX_trp-L(e)	L-Tryptophan exchange	trp-L[e] <=>				Exchange	1	0	1000	0	1
EX_tungs(e)	tungstate exchange	tungs[e] <=>				Exchange	1	-1000	1000	0	1
EX_tyr-L(e)	L-Tyrosine exchange	tyr-L[e] <=>				Exchange	1	0	1000	0	1
EX_ump(e)	UMP exchange	ump[e] <=>				Exchange	1	0	1000	0	1
EX_ura(e)	Uracil exchange	ura[e] <=>				Exchange	1	0	1000	0	1
EX_urea(e)	Urea exchange	urea[e] <=>				Exchange	1	0	1000	0	1
EX_uri(e)	Uridine exchange	uri[e] <=>				Exchange	1	0	1000	0	1
EX_val-L(e)	L-Valine exchange	val-L[e] <=>				Exchange	1	0	1000	0	1
EX_vanlt(e)	Vanillate exchange	vanlt[e] <=>				Exchange	1	0	1000	0	1
EX_xan(e)	Xanthine exchange	xan[e] <=>				Exchange	1	0	1000	0	1
EX_xmp(e)	Xanthosine 5'-phosphate exchange	xmp[e] <=>				Exchange	1	0	1000	0	1
EX_xtsn(e)	Xanthosine exchange	xtsn[e] <=>				Exchange	1	0	1000	0	1
EX_xyl-D(e)	D-Xylose exchange	xyl-D[e] <=>				Exchange	1	0	1000	0	1
EX_xylt(e)	Xylitol exchange	xylt[e] <=>				Exchange	1	0	1000	0	1
EX_zn2(e)	Zinc exchange	zn2[e] <=>				Exchange	1	-1000	1000	0	1
FOMETRi	Aminomethyltransferase	5fthf[c] + h[c] -> h2o[c] + methf[c]	SCO3183	SCO3183		Folate Metabolism	0	0	1000	0	2	2.1.2.10
FTHFD	formyltetrahydrofolate deformylase	10fthf[c] + h2o[c] -> for[c] + h[c] + thf[c]	SCO4403	SCO4403		Folate Metabolism	0	0	1000	0	2	3.5.1.10
GCALDD	Glycolaldehyde dehydrogenase	gcald[c] + h2o[c] + nad[c] -> glyclt[c] + 2 h[c] + nadh[c]	SCO3486	SCO3486		Folate Metabolism	0	0	1000	0	2	1.2.1.21
GLYCL	Glycine Cleavage System	gly[c] + nad[c] + thf[c] -> co2[c] + mlthf[c] + nadh[c] + nh4[c]	(SCO5471 and SCO1378 and SCO5472 and (SCO0884 or SCO2180 or SCO4919))	SCO5471 SCO1378 SCO5472 SCO0884 SCO2180 SCO4919	gcvH gcvP gcvT udrA pdhL	Folate Metabolism	0	0	1000	0	2
MTHFC	methenyltetrahydrofolate cyclohydrolase	h2o[c] + methf[c] <=> 10fthf[c] + h[c]	SCO4824	SCO4824	folD	Folate Metabolism	1	-1000	1000	0	2	3.5.4.9
MTHFD	methylenetetrahydrofolate dehydrogenase (NADP)	mlthf[c] + nadp[c] <=> methf[c] + nadph[c]	SCO4824	SCO4824	folD	Folate Metabolism	1	-1000	1000	0	2	1.5.1.5
MTHFR2	5,10-methylenetetrahydrofolate reductase (NADH)	2 h[c] + mlthf[c] + nadh[c] -> 5mthf[c] + nad[c]	SCO2103	SCO2103	metF	Folate Metabolism	0	0	1000	0	2	1.5.1.20
THFAT	Tetrahydrofolate aminomethyltransferase	h2o[c] + methf[c] -> 5fthf[c] + h[c]	(SCO4837 or SCO5470 or SCO5364)	SCO4837 SCO5470 SCO5364	glyA1 glyA2 glyA3	Folate Metabolism	0	0	1000	0	2	2.1.2.10
GERMA	germicidine synthase (germicidin A)	3oiC6ACP[c] + emcoa-S[c] + h[c] -> germicidinA[c] + ACP[c] + coa[c] + co2[c]	SCO7221	SCO7221	gcs	Germicidin Biosynthesis	0	0	1000	0	4			Chemler JA, Buchholz TJ, Geders TW, Akey DL, Rath CM, Chlipala GE, Smith JL, Sherman DH.#2012#Biochemical and structural characterization of germicidin synthase: analysis of a type III polyketide synthase that employs acyl-ACP as a starter unit donor.#J Am Chem Soc.#134#7359-7366#
GERMB	germicidine synthase (germicidin B)	3oaiC7ACP[c] + mmcoa-S[c] + h[c] -> germicidinB[c] + ACP[c] + coa[c] + co2[c]	SCO7221	SCO7221	gcs	Germicidin Biosynthesis	0	0	1000	0	4			Chemler JA, Buchholz TJ, Geders TW, Akey DL, Rath CM, Chlipala GE, Smith JL, Sherman DH.#2012#Biochemical and structural characterization of germicidin synthase: analysis of a type III polyketide synthase that employs acyl-ACP as a starter unit donor.#J Am Chem Soc.#134#7359-7366#
GERMC	germicidine synthase (germicidin C)	3oaiC7ACP[c] + emcoa-S[c] + h[c] -> germicidinC[c] + ACP[c] + coa[c] + co2[c]	SCO7221	SCO7221	gcs	Germicidin Biosynthesis	0	0	1000	0	4			Chemler JA, Buchholz TJ, Geders TW, Akey DL, Rath CM, Chlipala GE, Smith JL, Sherman DH.#2012#Biochemical and structural characterization of germicidin synthase: analysis of a type III polyketide synthase that employs acyl-ACP as a starter unit donor.#J Am Chem Soc.#134#7359-7366#
GERMD	germicidine synthase (germicidin D)	3oiC6ACP[c] + mmcoa-S[c] + h[c] -> germicidinD[c] + ACP[c] + coa[c] + co2[c]	SCO7221	SCO7221	gcs	Germicidin Biosynthesis	0	0	1000	0	4			Chemler JA, Buchholz TJ, Geders TW, Akey DL, Rath CM, Chlipala GE, Smith JL, Sherman DH.#2012#Biochemical and structural characterization of germicidin synthase: analysis of a type III polyketide synthase that employs acyl-ACP as a starter unit donor.#J Am Chem Soc.#134#7359-7366#
GLUDC	Glutamate Decarboxylase	glu-L[c] + h[c] -> 4abut[c] + co2[c]	SCO3416	SCO3416	gad	Glutamate Metabolism	0	0	1000	0	2	4.1.1.15
GLUDxi	glutamate dehydrogenase (NAD, irreversible)	glu-L[c] + h2o[c] + nad[c] -> akg[c] + h[c] + nadh[c] + nh4[c]	SCO2999	SCO2999	gdhB	Glutamate Metabolism	0	0	1000	0	2	1.4.1.4
GLUDyi	glutamate dehydrogenase (NADP, irreversible)	akg[c] + h[c] + nadph[c] + nh4[c] -> glu-L[c] + h2o[c] + nadp[c]	SCO4683	SCO4683	gdhA	Glutamate Metabolism	0	0	1000	0	2	1.4.1.4
GLUN	glutaminase	gln-L[c] + h2o[c] -> glu-L[c] + nh4[c]	SCO7049	SCO7049		Glutamate Metabolism	0	0	1000	0	2	3.5.1.2
GLNS	glutamine synthetase	atp[c] + glu-L[c] + nh4[c] -> adp[c] + gln-L[c] + h[c] + pi[c]	(SCO2198 or SCO2210)	SCO2198 SCO2210	glnA glnII	Glutamate Metabolism	0	0	1000	0	3	6.3.1.2		Rexer HU, Schäberle T, Wohlleben W, Engels A.#2006#Investigation of the functional properties and regulation of three glutamine synthetase-like genes in Streptomyces coelicolor A3(2).#Arch Microbiol.#186#447-458#
GLUSx	glutamate synthase (NADH2)	akg[c] + gln-L[c] + h[c] + nadh[c] -> 2 glu-L[c] + nad[c]	(SCO1977 or (SCO2025 and SCO2026))	SCO1977 SCO2025 SCO2026	gltD gltB	Glutamate Metabolism	0	0	1000	0	2	1.4.1.14
ACPPAT120	acyl-(acyl carrier protein):phosphate acyltransferase (C12:0)	ddcaACP[c] + h[c] + pi[c] -> ACP[c] + ddcap[c]				Glycerophospholipid Metabolism	0	0	1000	0	1		Required for growth (phospholipid biosynthesis)
ACPPAT140	acyl-(acyl carrier protein):phosphate acyltransferase (C14:0)	h[c] + myrsACP[c] + pi[c] -> ACP[c] + ttdcap[c]				Glycerophospholipid Metabolism	0	0	1000	0	1		Required for growth (phospholipid biosynthesis)
ACPPAT141	acyl-(acyl carrier protein):phosphate acyltransferase (C14:1)	h[c] + pi[c] + tdeACP[c] -> ACP[c] + ttdceap[c]				Glycerophospholipid Metabolism	0	0	1000	0	1		Required for growth (phospholipid biosynthesis)
ACPPAT150	acyl-(acyl carrier protein):phosphate acyltransferase (C15:0)	h[c] + ptdcaACP[c] + pi[c] -> ACP[c] + ptdcap[c]				Glycerophospholipid Metabolism	0	0	1000	0	1		Required for growth (phospholipid biosynthesis)
ACPPAT160	acyl-(acyl carrier protein):phosphate acyltransferase (C16:0)	h[c] + palmACP[c] + pi[c] -> ACP[c] + hdcap[c]				Glycerophospholipid Metabolism	0	0	1000	0	1		Required for growth (phospholipid biosynthesis)
ACPPAT161	acyl-(acyl carrier protein):phosphate acyltransferase (C16:1)	h[c] + hdeACP[c] + pi[c] -> ACP[c] + hdceap[c]				Glycerophospholipid Metabolism	0	0	1000	0	1		Required for growth (phospholipid biosynthesis)
ACPPAT170	acyl-(acyl carrier protein):phosphate acyltransferase (C17:0)	h[c] + hepdcaACP[c] + pi[c] -> ACP[c] + hepdcap[c]				Glycerophospholipid Metabolism	0	0	1000	0	1		Required for growth (phospholipid biosynthesis)
ACPPAT180	acyl-(acyl carrier protein):phosphate acyltransferase (C18:0)	h[c] + ocdcaACP[c] + pi[c] -> ACP[c] + ocdcap[c]				Glycerophospholipid Metabolism	0	0	1000	0	1		Required for growth (phospholipid biosynthesis)
ACPPAT181	acyl-(acyl carrier protein):phosphate acyltransferase (C18:1)	h[c] + octeACP[c] + pi[c] -> ACP[c] + ocdceap[c]				Glycerophospholipid Metabolism	0	0	1000	0	1		Required for growth (phospholipid biosynthesis)
ACPPATai150	acyl-(acyl carrier protein):phosphate acyltransferase (ante-iso-C15:0)	h[c] + aiC15ACP[c] + pi[c] -> ACP[c] + aiC15p[c]				Glycerophospholipid Metabolism	0	0	1000	0	1		Required for growth (phospholipid biosynthesis)
ACPPATai170	acyl-(acyl carrier protein):phosphate acyltransferase (ante-iso-C17:0)	h[c] + aiC17ACP[c] + pi[c] -> ACP[c] + aiC17p[c]				Glycerophospholipid Metabolism	0	0	1000	0	1		Required for growth (phospholipid biosynthesis)
ACPPATi140	acyl-(acyl carrier protein):phosphate acyltransferase (iso-C14:0)	h[c] + iC14ACP[c] + pi[c] -> ACP[c] + iC14p[c]				Glycerophospholipid Metabolism	0	0	1000	0	1		Required for growth (phospholipid biosynthesis)
ACPPATi150	acyl-(acyl carrier protein):phosphate acyltransferase (iso-C15:0)	h[c] + iC15ACP[c] + pi[c] -> ACP[c] + iC15p[c]				Glycerophospholipid Metabolism	0	0	1000	0	1		Required for growth (phospholipid biosynthesis)
ACPPATi160	acyl-(acyl carrier protein):phosphate acyltransferase (iso-C16:0)	h[c] + iC16ACP[c] + pi[c] -> ACP[c] + iC16p[c]				Glycerophospholipid Metabolism	0	0	1000	0	1		Required for growth (phospholipid biosynthesis)
ACPPATi170	acyl-(acyl carrier protein):phosphate acyltransferase (iso-C17:0)	h[c] + iC17ACP[c] + pi[c] -> ACP[c] + iC17p[c]				Glycerophospholipid Metabolism	0	0	1000	0	1		Required for growth (phospholipid biosynthesis)
ACPPATi180	acyl-(acyl carrier protein):phosphate acyltransferase (iso-C18:0)	h[c] + iC18ACP[c] + pi[c] -> ACP[c] + iC18p[c]				Glycerophospholipid Metabolism	0	0	1000	0	1		Required for growth (phospholipid biosynthesis)
AGPAT120	1-tetradecanoyl-sn-glycerol 3-phosphate O-acyltransferase (n-C12:0)	1ddecg3p[c] + ddcaACP[c] -> ACP[c] + pa120[c]	(SCO0920 or SCO1085 or SCO1228 or SCO1566 or SCO1759 or SCO2122)	SCO0920 SCO1085 SCO1228 SCO1566 SCO1759 SCO2122		Glycerophospholipid Metabolism	0	0	1000	0	2	2.3.1.51
AGPAT140	1-tetradecanoyl-sn-glycerol 3-phosphate O-acyltransferase (n-C14:0)	1tdecg3p[c] + myrsACP[c] -> ACP[c] + pa140[c]	(SCO0920 or SCO1085 or SCO1228 or SCO1566 or SCO1759 or SCO2122)	SCO0920 SCO1085 SCO1228 SCO1566 SCO1759 SCO2122		Glycerophospholipid Metabolism	0	0	1000	0	2	2.3.1.51
AGPAT141	1-tetradec-7-enoyl-sn-glycerol 3-phosphate O-acyltransferase (n-C14:1)	1tdec7eg3p[c] + tdeACP[c] -> ACP[c] + pa141[c]	(SCO0920 or SCO1085 or SCO1228 or SCO1566 or SCO1759 or SCO2122)	SCO0920 SCO1085 SCO1228 SCO1566 SCO1759 SCO2122		Glycerophospholipid Metabolism	0	0	1000	0	2	2.3.1.51
AGPAT150	1-pentadecanoyl-sn-glycerol 3-phosphate O-acyltransferase (n-C15:0)	1ptdecg3p[c] + ptdcaACP[c] -> ACP[c] + pa150[c]	(SCO0920 or SCO1085 or SCO1228 or SCO1566 or SCO1759 or SCO2122)	SCO0920 SCO1085 SCO1228 SCO1566 SCO1759 SCO2122		Glycerophospholipid Metabolism	0	0	1000	0	2	2.3.1.51
AGPAT160	1-hexadecanoyl-sn-glycerol 3-phosphate O-acyltransferase (n-C16:0)	1hdecg3p[c] + palmACP[c] -> ACP[c] + pa160[c]	(SCO0920 or SCO1085 or SCO1228 or SCO1566 or SCO1759 or SCO2122)	SCO0920 SCO1085 SCO1228 SCO1566 SCO1759 SCO2122		Glycerophospholipid Metabolism	0	0	1000	0	2	2.3.1.51
AGPAT161	1-hexadec-7-enoyl-sn-glycerol 3-phosphate O-acyltransferase (n-C16:1)	1hdec9eg3p[c] + hdeACP[c] -> ACP[c] + pa161[c]	(SCO0920 or SCO1085 or SCO1228 or SCO1566 or SCO1759 or SCO2122)	SCO0920 SCO1085 SCO1228 SCO1566 SCO1759 SCO2122		Glycerophospholipid Metabolism	0	0	1000	0	2	2.3.1.51
AGPAT170	1-heptadecanoyl-sn-glycerol 3-phosphate O-acyltransferase (n-C17:0)	1hepdecg3p[c] + hepdcaACP[c] -> ACP[c] + pa170[c]	(SCO0920 or SCO1085 or SCO1228 or SCO1566 or SCO1759 or SCO2122)	SCO0920 SCO1085 SCO1228 SCO1566 SCO1759 SCO2122		Glycerophospholipid Metabolism	0	0	1000	0	2	2.3.1.51
AGPAT180	1-octadecanoyl-sn-glycerol 3-phosphate O-acyltransferase (n-C18:0)	1odecg3p[c] + ocdcaACP[c] -> ACP[c] + pa180[c]	(SCO0920 or SCO1085 or SCO1228 or SCO1566 or SCO1759 or SCO2122)	SCO0920 SCO1085 SCO1228 SCO1566 SCO1759 SCO2122		Glycerophospholipid Metabolism	0	0	1000	0	2	2.3.1.51
AGPAT181	1-octadec-7-enoyl-sn-glycerol 3-phosphate O-acyltransferase (n-C18:1)	1odec11eg3p[c] + octeACP[c] -> ACP[c] + pa181[c]	(SCO0920 or SCO1085 or SCO1228 or SCO1566 or SCO1759 or SCO2122)	SCO0920 SCO1085 SCO1228 SCO1566 SCO1759 SCO2122		Glycerophospholipid Metabolism	0	0	1000	0	2	2.3.1.51
AGPATai150	1-pentadecanoyl-sn-glycerol 3-phosphate O-acyltransferase (ante-iso-C15:0)	1aiC15g3p[c] + aiC15ACP[c] -> ACP[c] + paai150[c]	(SCO0920 or SCO1085 or SCO1228 or SCO1566 or SCO1759 or SCO2122)	SCO0920 SCO1085 SCO1228 SCO1566 SCO1759 SCO2122		Glycerophospholipid Metabolism	0	0	1000	0	2	2.3.1.51
AGPATai170	1-heptadecanoyl-sn-glycerol 3-phosphate O-acyltransferase (ante-iso-C17:0)	1aiC17g3p[c] + aiC17ACP[c] -> ACP[c] + paai170[c]	(SCO0920 or SCO1085 or SCO1228 or SCO1566 or SCO1759 or SCO2122)	SCO0920 SCO1085 SCO1228 SCO1566 SCO1759 SCO2122		Glycerophospholipid Metabolism	0	0	1000	0	2	2.3.1.51
AGPATi140	1-tetradecanoyl-sn-glycerol 3-phosphate O-acyltransferase (iso-C14:0)	1iC14g3p[c] + iC14ACP[c] -> ACP[c] + pai140[c]	(SCO0920 or SCO1085 or SCO1228 or SCO1566 or SCO1759 or SCO2122)	SCO0920 SCO1085 SCO1228 SCO1566 SCO1759 SCO2122		Glycerophospholipid Metabolism	0	0	1000	0	2	2.3.1.51
AGPATi150	1-pentadecanoyl-sn-glycerol 3-phosphate O-acyltransferase (iso-C15:0)	1iC15g3p[c] + iC15ACP[c] -> ACP[c] + pai150[c]	(SCO0920 or SCO1085 or SCO1228 or SCO1566 or SCO1759 or SCO2122)	SCO0920 SCO1085 SCO1228 SCO1566 SCO1759 SCO2122		Glycerophospholipid Metabolism	0	0	1000	0	2	2.3.1.51
AGPATi160	1-hexadecanoyl-sn-glycerol 3-phosphate O-acyltransferase (iso-C16:0)	1iC16g3p[c] + iC16ACP[c] -> ACP[c] + pai160[c]	(SCO0920 or SCO1085 or SCO1228 or SCO1566 or SCO1759 or SCO2122)	SCO0920 SCO1085 SCO1228 SCO1566 SCO1759 SCO2122		Glycerophospholipid Metabolism	0	0	1000	0	2	2.3.1.51
AGPATi170	1-heptadecanoyl-sn-glycerol 3-phosphate O-acyltransferase (iso-C17:0)	1iC17g3p[c] + iC17ACP[c] -> ACP[c] + pai170[c]	(SCO0920 or SCO1085 or SCO1228 or SCO1566 or SCO1759 or SCO2122)	SCO0920 SCO1085 SCO1228 SCO1566 SCO1759 SCO2122		Glycerophospholipid Metabolism	0	0	1000	0	2	2.3.1.51
AGPATi180	1-octadecanoyl-sn-glycerol 3-phosphate O-acyltransferase (iso-C18:0)	1iC18g3p[c] + iC18ACP[c] -> ACP[c] + pai180[c]	(SCO0920 or SCO1085 or SCO1228 or SCO1566 or SCO1759 or SCO2122)	SCO0920 SCO1085 SCO1228 SCO1566 SCO1759 SCO2122		Glycerophospholipid Metabolism	0	0	1000	0	2	2.3.1.51
APG3PAT120	acyl-phosphate:glycerol-3-phosphate acyltransferase (C12:0)	ddcap[c] + glyc3p[c] -> 1ddecg3p[c] + h[c] + pi[c]				Glycerophospholipid Metabolism	0	0	1000	0	1		Required for growth (phospholipid biosynthesis)
APG3PAT140	acyl-phosphate:glycerol-3-phosphate acyltransferase (C14:0)	glyc3p[c] + ttdcap[c] -> 1tdecg3p[c] + h[c] + pi[c]				Glycerophospholipid Metabolism	0	0	1000	0	1		Required for growth (phospholipid biosynthesis)
APG3PAT141	acyl-phosphate:glycerol-3-phosphate acyltransferase (C14:1)	glyc3p[c] + ttdceap[c] -> 1tdec7eg3p[c] + h[c] + pi[c]				Glycerophospholipid Metabolism	0	0	1000	0	1		Required for growth (phospholipid biosynthesis)
APG3PAT150	acyl-phosphate:glycerol-3-phosphate acyltransferase (C15:0)	glyc3p[c] + ptdcap[c] -> 1ptdecg3p[c] + h[c] + pi[c]				Glycerophospholipid Metabolism	0	0	1000	0	1		Required for growth (phospholipid biosynthesis)
APG3PAT160	acyl-phosphate:glycerol-3-phosphate acyltransferase (C16:0)	glyc3p[c] + hdcap[c] -> 1hdecg3p[c] + h[c] + pi[c]				Glycerophospholipid Metabolism	0	0	1000	0	1		Required for growth (phospholipid biosynthesis)
APG3PAT161	acyl-phosphate:glycerol-3-phosphate acyltransferase (C16:1)	glyc3p[c] + hdceap[c] -> 1hdec9eg3p[c] + h[c] + pi[c]				Glycerophospholipid Metabolism	0	0	1000	0	1		Required for growth (phospholipid biosynthesis)
APG3PAT170	acyl-phosphate:glycerol-3-phosphate acyltransferase (C17:0)	glyc3p[c] + hepdcap[c] -> 1hepdecg3p[c] + h[c] + pi[c]				Glycerophospholipid Metabolism	0	0	1000	0	1		Required for growth (phospholipid biosynthesis)
APG3PAT180	acyl-phosphate:glycerol-3-phosphate acyltransferase (C18:0)	glyc3p[c] + ocdcap[c] -> 1odecg3p[c] + h[c] + pi[c]				Glycerophospholipid Metabolism	0	0	1000	0	1		Required for growth (phospholipid biosynthesis)
APG3PAT181	acyl-phosphate:glycerol-3-phosphate acyltransferase (C18:1)	glyc3p[c] + ocdceap[c] -> 1odec11eg3p[c] + h[c] + pi[c]				Glycerophospholipid Metabolism	0	0	1000	0	1		Required for growth (phospholipid biosynthesis)
APG3PATai150	acyl-phosphate:glycerol-3-phosphate acyltransferase (ante-iso-C15:0)	glyc3p[c] + aiC15p[c] -> 1aiC15g3p[c] + h[c] + pi[c]				Glycerophospholipid Metabolism	0	0	1000	0	1		Required for growth (phospholipid biosynthesis)
APG3PATai170	acyl-phosphate:glycerol-3-phosphate acyltransferase (ante-iso-C17:0)	glyc3p[c] + aiC17p[c] -> 1aiC17g3p[c] + h[c] + pi[c]				Glycerophospholipid Metabolism	0	0	1000	0	1		Required for growth (phospholipid biosynthesis)
APG3PATi140	acyl-phosphate:glycerol-3-phosphate acyltransferase (iso-C14:0)	glyc3p[c] + iC14p[c] -> 1iC14g3p[c] + h[c] + pi[c]				Glycerophospholipid Metabolism	0	0	1000	0	1		Required for growth (phospholipid biosynthesis)
APG3PATi150	acyl-phosphate:glycerol-3-phosphate acyltransferase (iso-C15:0)	glyc3p[c] + iC15p[c] -> 1iC15g3p[c] + h[c] + pi[c]				Glycerophospholipid Metabolism	0	0	1000	0	1		Required for growth (phospholipid biosynthesis)
APG3PATi160	acyl-phosphate:glycerol-3-phosphate acyltransferase (iso-C16:0)	glyc3p[c] + iC16p[c] -> 1iC16g3p[c] + h[c] + pi[c]				Glycerophospholipid Metabolism	0	0	1000	0	1		Required for growth (phospholipid biosynthesis)
APG3PATi170	acyl-phosphate:glycerol-3-phosphate acyltransferase (iso-C17:0)	glyc3p[c] + iC17p[c] -> 1iC17g3p[c] + h[c] + pi[c]				Glycerophospholipid Metabolism	0	0	1000	0	1		Required for growth (phospholipid biosynthesis)
APG3PATi180	acyl-phosphate:glycerol-3-phosphate acyltransferase (iso-C18:0)	glyc3p[c] + iC18p[c] -> 1iC18g3p[c] + h[c] + pi[c]				Glycerophospholipid Metabolism	0	0	1000	0	1		Required for growth (phospholipid biosynthesis)
APH120	acylphosphatase (C12:0)	h2o[c] + ddcap[c] -> 2 h[c] + pi[c] + ddca[c]	SCO5576	SCO5576		Glycerophospholipid Metabolism	0	0	1000	0	2	3.6.1.7
APH140	acylphosphatase (C14:0)	h2o[c] + ttdcap[c] -> 2 h[c] + pi[c] + ttdca[c]	SCO5576	SCO5576		Glycerophospholipid Metabolism	0	0	1000	0	2	3.6.1.7
APH141	acylphosphatase (C14:1)	h2o[c] + ttdceap[c] -> 2 h[c] + pi[c] + ttdcea[c]	SCO5576	SCO5576		Glycerophospholipid Metabolism	0	0	1000	0	2	3.6.1.7
APH150	acylphosphatase (C15:0)	h2o[c] + ptdcap[c] -> 2 h[c] + pi[c] + ptdca[c]	SCO5576	SCO5576		Glycerophospholipid Metabolism	0	0	1000	0	2	3.6.1.7
APH160	acylphosphatase (C16:0)	h2o[c] + hdcap[c] -> 2 h[c] + pi[c] + hdca[c]	SCO5576	SCO5576		Glycerophospholipid Metabolism	0	0	1000	0	2	3.6.1.7
APH161	acylphosphatase (C16:1)	h2o[c] + hdceap[c] -> 2 h[c] + pi[c] + hdcea[c]	SCO5576	SCO5576		Glycerophospholipid Metabolism	0	0	1000	0	2	3.6.1.7
APH170	acylphosphatase (C17:0)	h2o[c] + hepdcap[c] -> 2 h[c] + pi[c] + hepdca[c]	SCO5576	SCO5576		Glycerophospholipid Metabolism	0	0	1000	0	2	3.6.1.7
APH180	acylphosphatase (C18:0)	h2o[c] + ocdcap[c] -> 2 h[c] + pi[c] + ocdca[c]	SCO5576	SCO5576		Glycerophospholipid Metabolism	0	0	1000	0	2	3.6.1.7
APH181	acylphosphatase (C18:1)	h2o[c] + ocdceap[c] -> 2 h[c] + pi[c] + ocdcea[c]	SCO5576	SCO5576		Glycerophospholipid Metabolism	0	0	1000	0	2	3.6.1.7
APHai150	acylphosphatase (ante-iso-C15:0)	h2o[c] + aiC15p[c] -> 2 h[c] + pi[c] + aiC15[c]	SCO5576	SCO5576		Glycerophospholipid Metabolism	0	0	1000	0	2	3.6.1.7
APHai170	acylphosphatase (ante-iso-C17:0)	h2o[c] + aiC17p[c] -> 2 h[c] + pi[c] + aiC17[c]	SCO5576	SCO5576		Glycerophospholipid Metabolism	0	0	1000	0	2	3.6.1.7
APHi140	acylphosphatase (iso-C14:0)	h2o[c] + iC14p[c] -> 2 h[c] + pi[c] + iC14[c]	SCO5576	SCO5576		Glycerophospholipid Metabolism	0	0	1000	0	2	3.6.1.7
APHi150	acylphosphatase (iso-C15:0)	h2o[c] + iC15p[c] -> 2 h[c] + pi[c] + iC15[c]	SCO5576	SCO5576		Glycerophospholipid Metabolism	0	0	1000	0	2	3.6.1.7
APHi160	acylphosphatase (iso-C16:0)	h2o[c] + iC16p[c] -> 2 h[c] + pi[c] + iC16[c]	SCO5576	SCO5576		Glycerophospholipid Metabolism	0	0	1000	0	2	3.6.1.7
APHi170	acylphosphatase (iso-C17:0)	h2o[c] + iC17p[c] -> 2 h[c] + pi[c] + iC17[c]	SCO5576	SCO5576		Glycerophospholipid Metabolism	0	0	1000	0	2	3.6.1.7
APHi180	acylphosphatase (iso-C18:0)	h2o[c] + iC18p[c] -> 2 h[c] + pi[c] + iC18[c]	SCO5576	SCO5576		Glycerophospholipid Metabolism	0	0	1000	0	2	3.6.1.7
CLPNS120	cardiolipin synthase (n-C12:0)	2 pg120[c] <=> clpn120[c] + glyc[c]	SCO7081	SCO7081		Glycerophospholipid Metabolism	1	-1000	1000	0	2
CLPNS140	cardiolipin synthase (n-C14:0)	2 pg140[c] <=> clpn140[c] + glyc[c]	SCO7081	SCO7081		Glycerophospholipid Metabolism	1	-1000	1000	0	2
CLPNS141	cardiolipin synthase (n-C14:1)	2 pg141[c] <=> clpn141[c] + glyc[c]	SCO7081	SCO7081		Glycerophospholipid Metabolism	1	-1000	1000	0	2
CLPNS150	cardiolipin synthase (n-C15:0)	2 pg150[c] <=> clpn150[c] + glyc[c]	SCO7081	SCO7081		Glycerophospholipid Metabolism	1	-1000	1000	0	2
CLPNS160	cardiolipin synthase (n-C16:0)	2 pg160[c] <=> clpn160[c] + glyc[c]	SCO7081	SCO7081		Glycerophospholipid Metabolism	1	-1000	1000	0	2
CLPNS161	cardiolipin synthase (n-C16:1)	2 pg161[c] <=> clpn161[c] + glyc[c]	SCO7081	SCO7081		Glycerophospholipid Metabolism	1	-1000	1000	0	2
CLPNS170	cardiolipin synthase (n-C17:0)	2 pg170[c] <=> clpn170[c] + glyc[c]	SCO7081	SCO7081		Glycerophospholipid Metabolism	1	-1000	1000	0	2
CLPNS180	cardiolipin synthase (n-C18:0)	2 pg180[c] <=> clpn180[c] + glyc[c]	SCO7081	SCO7081		Glycerophospholipid Metabolism	1	-1000	1000	0	2
CLPNS181	cardiolipin synthase (n-C18:1)	2 pg181[c] <=> clpn181[c] + glyc[c]	SCO7081	SCO7081		Glycerophospholipid Metabolism	1	-1000	1000	0	2
CLPNSai150	cardiolipin synthase (ante-iso-C15:0)	2 pgai150[c] <=> clpnai150[c] + glyc[c]	SCO7081	SCO7081		Glycerophospholipid Metabolism	1	-1000	1000	0	2
CLPNSai170	cardiolipin synthase (ante-iso-C17:0)	2 pgai170[c] <=> clpnai170[c] + glyc[c]	SCO7081	SCO7081		Glycerophospholipid Metabolism	1	-1000	1000	0	2
CLPNSi140	cardiolipin synthase (iso-C14:0)	2 pgi140[c] <=> clpni140[c] + glyc[c]	SCO7081	SCO7081		Glycerophospholipid Metabolism	1	-1000	1000	0	2
CLPNSi150	cardiolipin synthase (iso-C15:0)	2 pgi150[c] <=> clpni150[c] + glyc[c]	SCO7081	SCO7081		Glycerophospholipid Metabolism	1	-1000	1000	0	2
CLPNSi160	cardiolipin synthase (iso-C16:0)	2 pgi160[c] <=> clpni160[c] + glyc[c]	SCO7081	SCO7081		Glycerophospholipid Metabolism	1	-1000	1000	0	2
CLPNSi170	cardiolipin synthase (iso-C17:0)	2 pgi170[c] <=> clpni170[c] + glyc[c]	SCO7081	SCO7081		Glycerophospholipid Metabolism	1	-1000	1000	0	2
CLPNSi180	cardiolipin synthase (iso-C18:0)	2 pgi180[c] <=> clpni180[c] + glyc[c]	SCO7081	SCO7081		Glycerophospholipid Metabolism	1	-1000	1000	0	2
CLPNSII120	cardiolipin synthase II (n-C12:0)	cdpdddecg[c] + pg120[c] -> clpn120[c] + cmp[c] + h[c]	SCO1389	SCO1389	cls	Glycerophospholipid Metabolism	0	0	1000	0	4	2.7.8.5		Sandoval-Calderón M, Geiger O, Guan Z, Barona-Gómez F, Sohlenkamp C.#2009#A eukaryote-like cardiolipin synthase is present in Streptomyces coelicolor and in most actinobacteria.#J Biol Chem.#284#17383-17390#
CLPNSII140	cardiolipin synthase II (n-C14:0)	cdpdtdecg[c] + pg140[c] -> clpn140[c] + cmp[c] + h[c]	SCO1389	SCO1389	cls	Glycerophospholipid Metabolism	0	0	1000	0	4	2.7.8.5		Sandoval-Calderón M, Geiger O, Guan Z, Barona-Gómez F, Sohlenkamp C.#2009#A eukaryote-like cardiolipin synthase is present in Streptomyces coelicolor and in most actinobacteria.#J Biol Chem.#284#17383-17390#
CLPNSII141	cardiolipin synthase II (n-C14:1)	cdpdtdec7eg[c] + pg141[c] -> clpn141[c] + cmp[c] + h[c]	SCO1389	SCO1389	cls	Glycerophospholipid Metabolism	0	0	1000	0	4	2.7.8.5		Sandoval-Calderón M, Geiger O, Guan Z, Barona-Gómez F, Sohlenkamp C.#2009#A eukaryote-like cardiolipin synthase is present in Streptomyces coelicolor and in most actinobacteria.#J Biol Chem.#284#17383-17390#
CLPNSII150	cardiolipin synthase II (n-C15:0)	cdpdptdecg[c] + pg150[c] -> clpn150[c] + cmp[c] + h[c]	SCO1389	SCO1389	cls	Glycerophospholipid Metabolism	0	0	1000	0	4	2.7.8.5		Sandoval-Calderón M, Geiger O, Guan Z, Barona-Gómez F, Sohlenkamp C.#2009#A eukaryote-like cardiolipin synthase is present in Streptomyces coelicolor and in most actinobacteria.#J Biol Chem.#284#17383-17390#
CLPNSII160	cardiolipin synthase II (n-C16:0)	cdpdhdecg[c] + pg160[c] -> clpn160[c] + cmp[c] + h[c]	SCO1389	SCO1389	cls	Glycerophospholipid Metabolism	0	0	1000	0	4	2.7.8.5		Sandoval-Calderón M, Geiger O, Guan Z, Barona-Gómez F, Sohlenkamp C.#2009#A eukaryote-like cardiolipin synthase is present in Streptomyces coelicolor and in most actinobacteria.#J Biol Chem.#284#17383-17390#
CLPNSII161	cardiolipin synthase II (n-C16:1)	cdpdhdec9eg[c] + pg161[c] -> clpn161[c] + cmp[c] + h[c]	SCO1389	SCO1389	cls	Glycerophospholipid Metabolism	0	0	1000	0	4	2.7.8.5		Sandoval-Calderón M, Geiger O, Guan Z, Barona-Gómez F, Sohlenkamp C.#2009#A eukaryote-like cardiolipin synthase is present in Streptomyces coelicolor and in most actinobacteria.#J Biol Chem.#284#17383-17390#
CLPNSII170	cardiolipin synthase II (n-C17:0)	cdpdhepdecg[c] + pg170[c] -> clpn170[c] + cmp[c] + h[c]	SCO1389	SCO1389	cls	Glycerophospholipid Metabolism	0	0	1000	0	4	2.7.8.5		Sandoval-Calderón M, Geiger O, Guan Z, Barona-Gómez F, Sohlenkamp C.#2009#A eukaryote-like cardiolipin synthase is present in Streptomyces coelicolor and in most actinobacteria.#J Biol Chem.#284#17383-17390#
CLPNSII180	cardiolipin synthase II (n-C18:0)	cdpdodecg[c] + pg180[c] -> clpn180[c] + cmp[c] + h[c]	SCO1389	SCO1389	cls	Glycerophospholipid Metabolism	0	0	1000	0	4	2.7.8.5		Sandoval-Calderón M, Geiger O, Guan Z, Barona-Gómez F, Sohlenkamp C.#2009#A eukaryote-like cardiolipin synthase is present in Streptomyces coelicolor and in most actinobacteria.#J Biol Chem.#284#17383-17390#
CLPNSII181	cardiolipin synthase II (n-C18:1)	cdpdodec11eg[c] + pg181[c] -> clpn181[c] + cmp[c] + h[c]	SCO1389	SCO1389	cls	Glycerophospholipid Metabolism	0	0	1000	0	4	2.7.8.5		Sandoval-Calderón M, Geiger O, Guan Z, Barona-Gómez F, Sohlenkamp C.#2009#A eukaryote-like cardiolipin synthase is present in Streptomyces coelicolor and in most actinobacteria.#J Biol Chem.#284#17383-17390#
CLPNSIIai150	cardiolipin synthase II (ante-iso-C15:0)	cdpdaiC15g[c] + pgai150[c] -> clpnai150[c] + cmp[c] + h[c]	SCO1389	SCO1389	cls	Glycerophospholipid Metabolism	0	0	1000	0	4	2.7.8.5		Sandoval-Calderón M, Geiger O, Guan Z, Barona-Gómez F, Sohlenkamp C.#2009#A eukaryote-like cardiolipin synthase is present in Streptomyces coelicolor and in most actinobacteria.#J Biol Chem.#284#17383-17390#
CLPNSIIai170	cardiolipin synthase II (ante-iso-C17:0)	cdpdaiC17g[c] + pgai170[c] -> clpnai170[c] + cmp[c] + h[c]	SCO1389	SCO1389	cls	Glycerophospholipid Metabolism	0	0	1000	0	4	2.7.8.5		Sandoval-Calderón M, Geiger O, Guan Z, Barona-Gómez F, Sohlenkamp C.#2009#A eukaryote-like cardiolipin synthase is present in Streptomyces coelicolor and in most actinobacteria.#J Biol Chem.#284#17383-17390#
CLPNSIIi140	cardiolipin synthase II (iso-C14:0)	cdpdiC14g[c] + pgi140[c] -> clpni140[c] + cmp[c] + h[c]	SCO1389	SCO1389	cls	Glycerophospholipid Metabolism	0	0	1000	0	4	2.7.8.5		Sandoval-Calderón M, Geiger O, Guan Z, Barona-Gómez F, Sohlenkamp C.#2009#A eukaryote-like cardiolipin synthase is present in Streptomyces coelicolor and in most actinobacteria.#J Biol Chem.#284#17383-17390#
CLPNSIIi150	cardiolipin synthase II (iso-C15:0)	cdpdiC15g[c] + pgi150[c] -> clpni150[c] + cmp[c] + h[c]	SCO1389	SCO1389	cls	Glycerophospholipid Metabolism	0	0	1000	0	4	2.7.8.5		Sandoval-Calderón M, Geiger O, Guan Z, Barona-Gómez F, Sohlenkamp C.#2009#A eukaryote-like cardiolipin synthase is present in Streptomyces coelicolor and in most actinobacteria.#J Biol Chem.#284#17383-17390#
CLPNSIIi160	cardiolipin synthase II (iso-C16:0)	cdpdiC16g[c] + pgi160[c] -> clpni160[c] + cmp[c] + h[c]	SCO1389	SCO1389	cls	Glycerophospholipid Metabolism	0	0	1000	0	4	2.7.8.5		Sandoval-Calderón M, Geiger O, Guan Z, Barona-Gómez F, Sohlenkamp C.#2009#A eukaryote-like cardiolipin synthase is present in Streptomyces coelicolor and in most actinobacteria.#J Biol Chem.#284#17383-17390#
CLPNSIIi170	cardiolipin synthase II (iso-C17:0)	cdpdiC17g[c] + pgi170[c] -> clpni170[c] + cmp[c] + h[c]	SCO1389	SCO1389	cls	Glycerophospholipid Metabolism	0	0	1000	0	4	2.7.8.5		Sandoval-Calderón M, Geiger O, Guan Z, Barona-Gómez F, Sohlenkamp C.#2009#A eukaryote-like cardiolipin synthase is present in Streptomyces coelicolor and in most actinobacteria.#J Biol Chem.#284#17383-17390#
CLPNSIIi180	cardiolipin synthase II (iso-C18:0)	cdpdiC18g[c] + pgi180[c] -> clpni180[c] + cmp[c] + h[c]	SCO1389	SCO1389	cls	Glycerophospholipid Metabolism	0	0	1000	0	4	2.7.8.5		Sandoval-Calderón M, Geiger O, Guan Z, Barona-Gómez F, Sohlenkamp C.#2009#A eukaryote-like cardiolipin synthase is present in Streptomyces coelicolor and in most actinobacteria.#J Biol Chem.#284#17383-17390#
DASYN120	CDP-diacylglycerol synthetase (n-C12:0)	ctp[c] + h[c] + pa120[c] -> cdpdddecg[c] + ppi[c]	SCO5628	SCO5628		Glycerophospholipid Metabolism	0	0	1000	0	2	2.7.7.41
DASYN140	CDP-diacylglycerol synthetase (n-C14:0)	ctp[c] + h[c] + pa140[c] -> cdpdtdecg[c] + ppi[c]	SCO5628	SCO5628		Glycerophospholipid Metabolism	0	0	1000	0	2	2.7.7.41
DASYN141	CDP-diacylglycerol synthetase (n-C14:1)	ctp[c] + h[c] + pa141[c] -> cdpdtdec7eg[c] + ppi[c]	SCO5628	SCO5628		Glycerophospholipid Metabolism	0	0	1000	0	2	2.7.7.41
DASYN150	CDP-diacylglycerol synthetase (n-C15:0)	ctp[c] + h[c] + pa150[c] -> cdpdptdecg[c] + ppi[c]	SCO5628	SCO5628		Glycerophospholipid Metabolism	0	0	1000	0	2	2.7.7.41
DASYN160	CDP-diacylglycerol synthetase (n-C16:0)	ctp[c] + h[c] + pa160[c] -> cdpdhdecg[c] + ppi[c]	SCO5628	SCO5628		Glycerophospholipid Metabolism	0	0	1000	0	2	2.7.7.41
DASYN161	CDP-diacylglycerol synthetase (n-C16:1)	ctp[c] + h[c] + pa161[c] -> cdpdhdec9eg[c] + ppi[c]	SCO5628	SCO5628		Glycerophospholipid Metabolism	0	0	1000	0	2	2.7.7.41
DASYN170	CDP-diacylglycerol synthetase (n-C17:0)	ctp[c] + h[c] + pa170[c] -> cdpdhepdecg[c] + ppi[c]	SCO5628	SCO5628		Glycerophospholipid Metabolism	0	0	1000	0	2	2.7.7.41
DASYN180	CDP-diacylglycerol synthetase (n-C18:0)	ctp[c] + h[c] + pa180[c] -> cdpdodecg[c] + ppi[c]	SCO5628	SCO5628		Glycerophospholipid Metabolism	0	0	1000	0	2	2.7.7.41
DASYN181	CDP-diacylglycerol synthetase (n-C18:1)	ctp[c] + h[c] + pa181[c] -> cdpdodec11eg[c] + ppi[c]	SCO5628	SCO5628		Glycerophospholipid Metabolism	0	0	1000	0	2	2.7.7.41
DASYNai150	CDP-diacylglycerol synthetase (ante-iso-C15:0)	ctp[c] + h[c] + paai150[c] -> cdpdaiC15g[c] + ppi[c]	SCO5628	SCO5628		Glycerophospholipid Metabolism	0	0	1000	0	2	2.7.7.41
DASYNai170	CDP-diacylglycerol synthetase (ante-iso-C17:0)	ctp[c] + h[c] + paai170[c] -> cdpdaiC17g[c] + ppi[c]	SCO5628	SCO5628		Glycerophospholipid Metabolism	0	0	1000	0	2	2.7.7.41
DASYNi140	CDP-diacylglycerol synthetase (iso-C14:0)	ctp[c] + h[c] + pai140[c] -> cdpdiC14g[c] + ppi[c]	SCO5628	SCO5628		Glycerophospholipid Metabolism	0	0	1000	0	2	2.7.7.41
DASYNi150	CDP-diacylglycerol synthetase (iso-C15:0)	ctp[c] + h[c] + pai150[c] -> cdpdiC15g[c] + ppi[c]	SCO5628	SCO5628		Glycerophospholipid Metabolism	0	0	1000	0	2	2.7.7.41
DASYNi160	CDP-diacylglycerol synthetase (iso-C16:0)	ctp[c] + h[c] + pai160[c] -> cdpdiC16g[c] + ppi[c]	SCO5628	SCO5628		Glycerophospholipid Metabolism	0	0	1000	0	2	2.7.7.41
DASYNi170	CDP-diacylglycerol synthetase (iso-C17:0)	ctp[c] + h[c] + pai170[c] -> cdpdiC17g[c] + ppi[c]	SCO5628	SCO5628		Glycerophospholipid Metabolism	0	0	1000	0	2	2.7.7.41
DASYNi180	CDP-diacylglycerol synthetase (iso-C18:0)	ctp[c] + h[c] + pai180[c] -> cdpdiC18g[c] + ppi[c]	SCO5628	SCO5628		Glycerophospholipid Metabolism	0	0	1000	0	2	2.7.7.41
GPDDA1	Glycerophosphodiester phosphodiesterase (Glycerophosphocholine)	g3pc[c] + h2o[c] -> chol[c] + glyc3p[c] + h[c]	(SCO1090 or SCO1419 or SCO3976 or SCO5661)	SCO1090 SCO1419 SCO3976 SCO5661	uqpQ1 uqpQ2 uqpQ3 uqpQ4	Glycerophospholipid Metabolism	0	0	1000	0	2	3.1.4.46
GPDDA1e	Glycerophosphodiester phosphodiesterase (Glycerophosphocholine)	g3pc[e] + h2o[e] -> chol[e] + glyc3p[e] + h[e]	(SCO1565 or SCO1968 or SCO7550)	SCO1565 SCO1968 SCO7550	glpQ1 glpQ2 glpQ3	Glycerophospholipid Metabolism	0	0	1000	0	2	3.1.4.46
GPDDA2	Glycerophosphodiester phosphodiesterase (Glycerophosphoethanolamine)	g3pe[c] + h2o[c] -> etha[c] + glyc3p[c] + h[c]	(SCO1090 or SCO1419 or SCO3976 or SCO5661)	SCO1090 SCO1419 SCO3976 SCO5661	uqpQ1 uqpQ2 uqpQ3 uqpQ4	Glycerophospholipid Metabolism	0	0	1000	0	2	3.1.4.46
GPDDA2e	Glycerophosphodiester phosphodiesterase (Glycerophosphoethanolamine)	g3pe[e] + h2o[e] -> etha[e] + glyc3p[e] + h[e]	(SCO1565 or SCO1968 or SCO7550)	SCO1565 SCO1968 SCO7550	glpQ1 glpQ2 glpQ3	Glycerophospholipid Metabolism	0	0	1000	0	2	3.1.4.46
GPDDA3	Glycerophosphodiester phosphodiesterase (Glycerophosphoserine)	g3ps[c] + h2o[c] -> glyc3p[c] + h[c] + ser-L[c]	(SCO1090 or SCO1419 or SCO3976 or SCO5661)	SCO1090 SCO1419 SCO3976 SCO5661	uqpQ1 uqpQ2 uqpQ3 uqpQ4	Glycerophospholipid Metabolism	0	0	1000	0	2	3.1.4.46
GPDDA3e	Glycerophosphodiester phosphodiesterase (Glycerophosphoserine)	g3ps[e] + h2o[e] -> glyc3p[e] + h[e] + ser-L[e]	(SCO1565 or SCO1968 or SCO7550)	SCO1565 SCO1968 SCO7550	glpQ1 glpQ2 glpQ3	Glycerophospholipid Metabolism	0	0	1000	0	2	3.1.4.46
GPDDA4	Glycerophosphodiester phosphodiesterase (Glycerophosphoglycerol)	g3pg[c] + h2o[c] -> glyc[c] + glyc3p[c] + h[c]	(SCO1090 or SCO1419 or SCO3976 or SCO5661)	SCO1090 SCO1419 SCO3976 SCO5661	uqpQ1 uqpQ2 uqpQ3 uqpQ4	Glycerophospholipid Metabolism	0	0	1000	0	2	3.1.4.46
GPDDA4e	Glycerophosphodiester phosphodiesterase (Glycerophosphoglycerol)	g3pg[e] + h2o[e] -> glyc[e] + glyc3p[e] + h[e]	(SCO1565 or SCO1968 or SCO7550)	SCO1565 SCO1968 SCO7550	glpQ1 glpQ2 glpQ3	Glycerophospholipid Metabolism	0	0	1000	0	2	3.1.4.46
GPDDA5	Glycerophosphodiester phosphodiesterase (Glycerophosphoinositol)	g3pi[c] + h2o[c] -> glyc3p[c] + h[c] + inost[c]	(SCO1090 or SCO1419 or SCO3976 or SCO5661)	SCO1090 SCO1419 SCO3976 SCO5661	uqpQ1 uqpQ2 uqpQ3 uqpQ4	Glycerophospholipid Metabolism	0	0	1000	0	2	3.1.4.46
GPDDA5e	Glycerophosphodiester phosphodiesterase (Glycerophosphoinositol)	g3pi[e] + h2o[e] -> glyc3p[e] + h[e] + inost[e]	(SCO1565 or SCO1968 or SCO7550)	SCO1565 SCO1968 SCO7550	glpQ1 glpQ2 glpQ3	Glycerophospholipid Metabolism	0	0	1000	0	2	3.1.4.46
PAPA120	Phosphatidate phosphatase (n-C12:0)	h2o[c] + pa120[c] -> 12dgr120[c] + pi[c]				Glycerophospholipid Metabolism	0	0	1000	0	1	3.1.3.4	Required for growth (triacylglycerol biosynthesis)
PAPA140	Phosphatidate phosphatase (n-C14:0)	h2o[c] + pa140[c] -> 12dgr140[c] + pi[c]				Glycerophospholipid Metabolism	0	0	1000	0	1	3.1.3.4	Required for growth (triacylglycerol biosynthesis)
PAPA141	Phosphatidate phosphatase (n-C14:1)	h2o[c] + pa141[c] -> 12dgr141[c] + pi[c]				Glycerophospholipid Metabolism	0	0	1000	0	1	3.1.3.4	Required for growth (triacylglycerol biosynthesis)
PAPA150	Phosphatidate phosphatase (n-C15:0)	h2o[c] + pa150[c] -> 12dgr150[c] + pi[c]				Glycerophospholipid Metabolism	0	0	1000	0	1	3.1.3.4	Required for growth (triacylglycerol biosynthesis)
PAPA160	Phosphatidate phosphatase (n-C16:0)	h2o[c] + pa160[c] -> 12dgr160[c] + pi[c]				Glycerophospholipid Metabolism	0	0	1000	0	1	3.1.3.4	Required for growth (triacylglycerol biosynthesis)
PAPA161	Phosphatidate phosphatase (n-C16:1)	h2o[c] + pa161[c] -> 12dgr161[c] + pi[c]				Glycerophospholipid Metabolism	0	0	1000	0	1	3.1.3.4	Required for growth (triacylglycerol biosynthesis)
PAPA170	Phosphatidate phosphatase (n-C17:0)	h2o[c] + pa170[c] -> 12dgr170[c] + pi[c]				Glycerophospholipid Metabolism	0	0	1000	0	1	3.1.3.4	Required for growth (triacylglycerol biosynthesis)
PAPA180	Phosphatidate phosphatase (n-C18:0)	h2o[c] + pa180[c] -> 12dgr180[c] + pi[c]				Glycerophospholipid Metabolism	0	0	1000	0	1	3.1.3.4	Required for growth (triacylglycerol biosynthesis)
PAPA181	Phosphatidate phosphatase (n-C18:1)	h2o[c] + pa181[c] -> 12dgr181[c] + pi[c]				Glycerophospholipid Metabolism	0	0	1000	0	1	3.1.3.4	Required for growth (triacylglycerol biosynthesis)
PAPAai150	Phosphatidate phosphatase (ante-iso-C15:0)	h2o[c] + paai150[c] -> 12dgrai150[c] + pi[c]				Glycerophospholipid Metabolism	0	0	1000	0	1	3.1.3.4	Required for growth (triacylglycerol biosynthesis)
PAPAai170	Phosphatidate phosphatase (ante-iso-C17:0)	h2o[c] + paai170[c] -> 12dgrai170[c] + pi[c]				Glycerophospholipid Metabolism	0	0	1000	0	1	3.1.3.4	Required for growth (triacylglycerol biosynthesis)
PAPAi140	Phosphatidate phosphatase (iso-C14:0)	h2o[c] + pai140[c] -> 12dgri140[c] + pi[c]				Glycerophospholipid Metabolism	0	0	1000	0	1	3.1.3.4	Required for growth (triacylglycerol biosynthesis)
PAPAi150	Phosphatidate phosphatase (iso-C15:0)	h2o[c] + pai150[c] -> 12dgri150[c] + pi[c]				Glycerophospholipid Metabolism	0	0	1000	0	1	3.1.3.4	Required for growth (triacylglycerol biosynthesis)
PAPAi160	Phosphatidate phosphatase (iso-C16:0)	h2o[c] + pai160[c] -> 12dgri160[c] + pi[c]				Glycerophospholipid Metabolism	0	0	1000	0	1	3.1.3.4	Required for growth (triacylglycerol biosynthesis)
PAPAi170	Phosphatidate phosphatase (iso-C17:0)	h2o[c] + pai170[c] -> 12dgri170[c] + pi[c]				Glycerophospholipid Metabolism	0	0	1000	0	1	3.1.3.4	Required for growth (triacylglycerol biosynthesis)
PAPAi180	Phosphatidate phosphatase (iso-C18:0)	h2o[c] + pai180[c] -> 12dgri180[c] + pi[c]				Glycerophospholipid Metabolism	0	0	1000	0	1	3.1.3.4	Required for growth (triacylglycerol biosynthesis)
PGSA120	Phosphatidylglycerol synthase (n-C12:0)	cdpdddecg[c] + glyc3p[c] -> cmp[c] + h[c] + pgp120[c]	SCO5753	SCO5753	pgsA	Glycerophospholipid Metabolism	0	0	1000	0	2	2.7.8.5		Sandoval-Calderón M, Geiger O, Guan Z, Barona-Gómez F, Sohlenkamp C.#2009#A eukaryote-like cardiolipin synthase is present in Streptomyces coelicolor and in most actinobacteria.#J Biol Chem.#284#17383-17390#
PGSA140	Phosphatidylglycerol synthase (n-C14:0)	cdpdtdecg[c] + glyc3p[c] -> cmp[c] + h[c] + pgp140[c]	SCO5753	SCO5753	pgsA	Glycerophospholipid Metabolism	0	0	1000	0	2	2.7.8.5		Sandoval-Calderón M, Geiger O, Guan Z, Barona-Gómez F, Sohlenkamp C.#2009#A eukaryote-like cardiolipin synthase is present in Streptomyces coelicolor and in most actinobacteria.#J Biol Chem.#284#17383-17390#
PGSA141	Phosphatidylglycerol synthase (n-C14:1)	cdpdtdec7eg[c] + glyc3p[c] -> cmp[c] + h[c] + pgp141[c]	SCO5753	SCO5753	pgsA	Glycerophospholipid Metabolism	0	0	1000	0	2	2.7.8.5		Sandoval-Calderón M, Geiger O, Guan Z, Barona-Gómez F, Sohlenkamp C.#2009#A eukaryote-like cardiolipin synthase is present in Streptomyces coelicolor and in most actinobacteria.#J Biol Chem.#284#17383-17390#
PGSA150	Phosphatidylglycerol synthase (n-C15:0)	cdpdptdecg[c] + glyc3p[c] -> cmp[c] + h[c] + pgp150[c]	SCO5753	SCO5753	pgsA	Glycerophospholipid Metabolism	0	0	1000	0	2	2.7.8.5		Sandoval-Calderón M, Geiger O, Guan Z, Barona-Gómez F, Sohlenkamp C.#2009#A eukaryote-like cardiolipin synthase is present in Streptomyces coelicolor and in most actinobacteria.#J Biol Chem.#284#17383-17390#
PGSA160	Phosphatidylglycerol synthase (n-C16:0)	cdpdhdecg[c] + glyc3p[c] -> cmp[c] + h[c] + pgp160[c]	SCO5753	SCO5753	pgsA	Glycerophospholipid Metabolism	0	0	1000	0	2	2.7.8.5		Sandoval-Calderón M, Geiger O, Guan Z, Barona-Gómez F, Sohlenkamp C.#2009#A eukaryote-like cardiolipin synthase is present in Streptomyces coelicolor and in most actinobacteria.#J Biol Chem.#284#17383-17390#
PGSA161	Phosphatidylglycerol synthase (n-C16:1)	cdpdhdec9eg[c] + glyc3p[c] -> cmp[c] + h[c] + pgp161[c]	SCO5753	SCO5753	pgsA	Glycerophospholipid Metabolism	0	0	1000	0	2	2.7.8.5		Sandoval-Calderón M, Geiger O, Guan Z, Barona-Gómez F, Sohlenkamp C.#2009#A eukaryote-like cardiolipin synthase is present in Streptomyces coelicolor and in most actinobacteria.#J Biol Chem.#284#17383-17390#
PGSA170	Phosphatidylglycerol synthase (n-C17:0)	cdpdhepdecg[c] + glyc3p[c] -> cmp[c] + h[c] + pgp170[c]	SCO5753	SCO5753	pgsA	Glycerophospholipid Metabolism	0	0	1000	0	2	2.7.8.5		Sandoval-Calderón M, Geiger O, Guan Z, Barona-Gómez F, Sohlenkamp C.#2009#A eukaryote-like cardiolipin synthase is present in Streptomyces coelicolor and in most actinobacteria.#J Biol Chem.#284#17383-17390#
PGSA180	Phosphatidylglycerol synthase (n-C18:0)	cdpdodecg[c] + glyc3p[c] -> cmp[c] + h[c] + pgp180[c]	SCO5753	SCO5753	pgsA	Glycerophospholipid Metabolism	0	0	1000	0	2	2.7.8.5		Sandoval-Calderón M, Geiger O, Guan Z, Barona-Gómez F, Sohlenkamp C.#2009#A eukaryote-like cardiolipin synthase is present in Streptomyces coelicolor and in most actinobacteria.#J Biol Chem.#284#17383-17390#
PGSA181	Phosphatidylglycerol synthase (n-C18:1)	cdpdodec11eg[c] + glyc3p[c] -> cmp[c] + h[c] + pgp181[c]	SCO5753	SCO5753	pgsA	Glycerophospholipid Metabolism	0	0	1000	0	2	2.7.8.5		Sandoval-Calderón M, Geiger O, Guan Z, Barona-Gómez F, Sohlenkamp C.#2009#A eukaryote-like cardiolipin synthase is present in Streptomyces coelicolor and in most actinobacteria.#J Biol Chem.#284#17383-17390#
PGSAai150	Phosphatidylglycerol synthase (ante-iso-C15:0)	cdpdaiC15g[c] + glyc3p[c] -> cmp[c] + h[c] + pgpai150[c]	SCO5753	SCO5753	pgsA	Glycerophospholipid Metabolism	0	0	1000	0	2	2.7.8.5		Sandoval-Calderón M, Geiger O, Guan Z, Barona-Gómez F, Sohlenkamp C.#2009#A eukaryote-like cardiolipin synthase is present in Streptomyces coelicolor and in most actinobacteria.#J Biol Chem.#284#17383-17390#
PGSAai170	Phosphatidylglycerol synthase (ante-iso-C17:0)	cdpdaiC17g[c] + glyc3p[c] -> cmp[c] + h[c] + pgpai170[c]	SCO5753	SCO5753	pgsA	Glycerophospholipid Metabolism	0	0	1000	0	2	2.7.8.5		Sandoval-Calderón M, Geiger O, Guan Z, Barona-Gómez F, Sohlenkamp C.#2009#A eukaryote-like cardiolipin synthase is present in Streptomyces coelicolor and in most actinobacteria.#J Biol Chem.#284#17383-17390#
PGSAi140	Phosphatidylglycerol synthase (iso-C14:0)	cdpdiC14g[c] + glyc3p[c] -> cmp[c] + h[c] + pgpi140[c]	SCO5753	SCO5753	pgsA	Glycerophospholipid Metabolism	0	0	1000	0	2	2.7.8.5		Sandoval-Calderón M, Geiger O, Guan Z, Barona-Gómez F, Sohlenkamp C.#2009#A eukaryote-like cardiolipin synthase is present in Streptomyces coelicolor and in most actinobacteria.#J Biol Chem.#284#17383-17390#
PGSAi150	Phosphatidylglycerol synthase (iso-C15:0)	cdpdiC15g[c] + glyc3p[c] -> cmp[c] + h[c] + pgpi150[c]	SCO5753	SCO5753	pgsA	Glycerophospholipid Metabolism	0	0	1000	0	2	2.7.8.5		Sandoval-Calderón M, Geiger O, Guan Z, Barona-Gómez F, Sohlenkamp C.#2009#A eukaryote-like cardiolipin synthase is present in Streptomyces coelicolor and in most actinobacteria.#J Biol Chem.#284#17383-17390#
PGSAi160	Phosphatidylglycerol synthase (iso-C16:0)	cdpdiC16g[c] + glyc3p[c] -> cmp[c] + h[c] + pgpi160[c]	SCO5753	SCO5753	pgsA	Glycerophospholipid Metabolism	0	0	1000	0	2	2.7.8.5		Sandoval-Calderón M, Geiger O, Guan Z, Barona-Gómez F, Sohlenkamp C.#2009#A eukaryote-like cardiolipin synthase is present in Streptomyces coelicolor and in most actinobacteria.#J Biol Chem.#284#17383-17390#
PGSAi170	Phosphatidylglycerol synthase (iso-C17:0)	cdpdiC17g[c] + glyc3p[c] -> cmp[c] + h[c] + pgpi170[c]	SCO5753	SCO5753	pgsA	Glycerophospholipid Metabolism	0	0	1000	0	2	2.7.8.5		Sandoval-Calderón M, Geiger O, Guan Z, Barona-Gómez F, Sohlenkamp C.#2009#A eukaryote-like cardiolipin synthase is present in Streptomyces coelicolor and in most actinobacteria.#J Biol Chem.#284#17383-17390#
PGSAi180	Phosphatidylglycerol synthase (iso-C18:0)	cdpdiC18g[c] + glyc3p[c] -> cmp[c] + h[c] + pgpi180[c]	SCO5753	SCO5753	pgsA	Glycerophospholipid Metabolism	0	0	1000	0	2	2.7.8.5		Sandoval-Calderón M, Geiger O, Guan Z, Barona-Gómez F, Sohlenkamp C.#2009#A eukaryote-like cardiolipin synthase is present in Streptomyces coelicolor and in most actinobacteria.#J Biol Chem.#284#17383-17390#
PINOS120	Phosphatidylinositol synthase (n-C12:0)	cdpdddecg[c] + inost[c] -> cmp[c] + h[c] + pi120[c]	SCO1527	SCO1527		Glycerophospholipid Metabolism	0	0	1000	0	2			Sandoval-Calderón M, Geiger O, Guan Z, Barona-Gómez F, Sohlenkamp C.#2009#A eukaryote-like cardiolipin synthase is present in Streptomyces coelicolor and in most actinobacteria.#J Biol Chem.#284#17383-17390#
PINOS140	Phosphatidylinositol synthase (n-C14:0)	cdpdtdecg[c] + inost[c] -> cmp[c] + h[c] + pi140[c]	SCO1527	SCO1527		Glycerophospholipid Metabolism	0	0	1000	0	2			Sandoval-Calderón M, Geiger O, Guan Z, Barona-Gómez F, Sohlenkamp C.#2009#A eukaryote-like cardiolipin synthase is present in Streptomyces coelicolor and in most actinobacteria.#J Biol Chem.#284#17383-17390#
PINOS141	Phosphatidylinositol synthase (n-C14:1)	cdpdtdec7eg[c] + inost[c] -> cmp[c] + h[c] + pi141[c]	SCO1527	SCO1527		Glycerophospholipid Metabolism	0	0	1000	0	2			Sandoval-Calderón M, Geiger O, Guan Z, Barona-Gómez F, Sohlenkamp C.#2009#A eukaryote-like cardiolipin synthase is present in Streptomyces coelicolor and in most actinobacteria.#J Biol Chem.#284#17383-17390#
PINOS150	Phosphatidylinositol synthase (n-C15:0)	cdpdptdecg[c] + inost[c] -> cmp[c] + h[c] + pi150[c]	SCO1527	SCO1527		Glycerophospholipid Metabolism	0	0	1000	0	2			Sandoval-Calderón M, Geiger O, Guan Z, Barona-Gómez F, Sohlenkamp C.#2009#A eukaryote-like cardiolipin synthase is present in Streptomyces coelicolor and in most actinobacteria.#J Biol Chem.#284#17383-17390#
PINOS160	Phosphatidylinositol synthase (n-C16:0)	cdpdhdecg[c] + inost[c] -> cmp[c] + h[c] + pi160[c]	SCO1527	SCO1527		Glycerophospholipid Metabolism	0	0	1000	0	2			Sandoval-Calderón M, Geiger O, Guan Z, Barona-Gómez F, Sohlenkamp C.#2009#A eukaryote-like cardiolipin synthase is present in Streptomyces coelicolor and in most actinobacteria.#J Biol Chem.#284#17383-17390#
PINOS161	Phosphatidylinositol synthase (n-C16:1)	cdpdhdec9eg[c] + inost[c] -> cmp[c] + h[c] + pi161[c]	SCO1527	SCO1527		Glycerophospholipid Metabolism	0	0	1000	0	2			Sandoval-Calderón M, Geiger O, Guan Z, Barona-Gómez F, Sohlenkamp C.#2009#A eukaryote-like cardiolipin synthase is present in Streptomyces coelicolor and in most actinobacteria.#J Biol Chem.#284#17383-17390#
PINOS170	Phosphatidylinositol synthase (n-C17:0)	cdpdhepdecg[c] + inost[c] -> cmp[c] + h[c] + pi170[c]	SCO1527	SCO1527		Glycerophospholipid Metabolism	0	0	1000	0	2			Sandoval-Calderón M, Geiger O, Guan Z, Barona-Gómez F, Sohlenkamp C.#2009#A eukaryote-like cardiolipin synthase is present in Streptomyces coelicolor and in most actinobacteria.#J Biol Chem.#284#17383-17390#
PINOS180	Phosphatidylinositol synthase (n-C18:0)	cdpdodecg[c] + inost[c] -> cmp[c] + h[c] + pi180[c]	SCO1527	SCO1527		Glycerophospholipid Metabolism	0	0	1000	0	2			Sandoval-Calderón M, Geiger O, Guan Z, Barona-Gómez F, Sohlenkamp C.#2009#A eukaryote-like cardiolipin synthase is present in Streptomyces coelicolor and in most actinobacteria.#J Biol Chem.#284#17383-17390#
PINOS181	Phosphatidylinositol synthase (n-C18:1)	cdpdodec11eg[c] + inost[c] -> cmp[c] + h[c] + pi181[c]	SCO1527	SCO1527		Glycerophospholipid Metabolism	0	0	1000	0	2			Sandoval-Calderón M, Geiger O, Guan Z, Barona-Gómez F, Sohlenkamp C.#2009#A eukaryote-like cardiolipin synthase is present in Streptomyces coelicolor and in most actinobacteria.#J Biol Chem.#284#17383-17390#
PINOSai150	Phosphatidylinositol synthase (ante-iso-C15:0)	cdpdaiC15g[c] + inost[c] -> cmp[c] + h[c] + piai150[c]	SCO1527	SCO1527		Glycerophospholipid Metabolism	0	0	1000	0	2			Sandoval-Calderón M, Geiger O, Guan Z, Barona-Gómez F, Sohlenkamp C.#2009#A eukaryote-like cardiolipin synthase is present in Streptomyces coelicolor and in most actinobacteria.#J Biol Chem.#284#17383-17390#
PINOSai170	Phosphatidylinositol synthase (ante-iso-C17:0)	cdpdaiC17g[c] + inost[c] -> cmp[c] + h[c] + piai170[c]	SCO1527	SCO1527		Glycerophospholipid Metabolism	0	0	1000	0	2			Sandoval-Calderón M, Geiger O, Guan Z, Barona-Gómez F, Sohlenkamp C.#2009#A eukaryote-like cardiolipin synthase is present in Streptomyces coelicolor and in most actinobacteria.#J Biol Chem.#284#17383-17390#
PINOSi140	Phosphatidylinositol synthase (iso-C14:0)	cdpdiC14g[c] + inost[c] -> cmp[c] + h[c] + pii140[c]	SCO1527	SCO1527		Glycerophospholipid Metabolism	0	0	1000	0	2			Sandoval-Calderón M, Geiger O, Guan Z, Barona-Gómez F, Sohlenkamp C.#2009#A eukaryote-like cardiolipin synthase is present in Streptomyces coelicolor and in most actinobacteria.#J Biol Chem.#284#17383-17390#
PINOSi150	Phosphatidylinositol synthase (iso-C15:0)	cdpdiC15g[c] + inost[c] -> cmp[c] + h[c] + pii150[c]	SCO1527	SCO1527		Glycerophospholipid Metabolism	0	0	1000	0	2			Sandoval-Calderón M, Geiger O, Guan Z, Barona-Gómez F, Sohlenkamp C.#2009#A eukaryote-like cardiolipin synthase is present in Streptomyces coelicolor and in most actinobacteria.#J Biol Chem.#284#17383-17390#
PINOSi160	Phosphatidylinositol synthase (iso-C16:0)	cdpdiC16g[c] + inost[c] -> cmp[c] + h[c] + pii160[c]	SCO1527	SCO1527		Glycerophospholipid Metabolism	0	0	1000	0	2			Sandoval-Calderón M, Geiger O, Guan Z, Barona-Gómez F, Sohlenkamp C.#2009#A eukaryote-like cardiolipin synthase is present in Streptomyces coelicolor and in most actinobacteria.#J Biol Chem.#284#17383-17390#
PINOSi170	Phosphatidylinositol synthase (iso-C17:0)	cdpdiC17g[c] + inost[c] -> cmp[c] + h[c] + pii170[c]	SCO1527	SCO1527		Glycerophospholipid Metabolism	0	0	1000	0	2			Sandoval-Calderón M, Geiger O, Guan Z, Barona-Gómez F, Sohlenkamp C.#2009#A eukaryote-like cardiolipin synthase is present in Streptomyces coelicolor and in most actinobacteria.#J Biol Chem.#284#17383-17390#
PINOSi180	Phosphatidylinositol synthase (iso-C18:0)	cdpdiC18g[c] + inost[c] -> cmp[c] + h[c] + pii180[c]	SCO1527	SCO1527		Glycerophospholipid Metabolism	0	0	1000	0	2			Sandoval-Calderón M, Geiger O, Guan Z, Barona-Gómez F, Sohlenkamp C.#2009#A eukaryote-like cardiolipin synthase is present in Streptomyces coelicolor and in most actinobacteria.#J Biol Chem.#284#17383-17390#
PSD120	Phosphatidylserine decarboxylase (n-C12:0)	h[c] + ps120[c] -> co2[c] + pe120[c]	SCO6468	SCO6468		Glycerophospholipid Metabolism	0	0	1000	0	2	4.1.1.65
PSD140	Phosphatidylserine decarboxylase (n-C14:0)	h[c] + ps140[c] -> co2[c] + pe140[c]	SCO6468	SCO6468		Glycerophospholipid Metabolism	0	0	1000	0	2	4.1.1.65
PSD141	Phosphatidylserine decarboxylase (n-C14:1)	h[c] + ps141[c] -> co2[c] + pe141[c]	SCO6468	SCO6468		Glycerophospholipid Metabolism	0	0	1000	0	2	4.1.1.65
PSD150	Phosphatidylserine decarboxylase (n-C15:0)	h[c] + ps150[c] -> co2[c] + pe150[c]	SCO6468	SCO6468		Glycerophospholipid Metabolism	0	0	1000	0	2	4.1.1.65
PSD160	Phosphatidylserine decarboxylase (n-C16:0)	h[c] + ps160[c] -> co2[c] + pe160[c]	SCO6468	SCO6468		Glycerophospholipid Metabolism	0	0	1000	0	2	4.1.1.65
PSD161	Phosphatidylserine decarboxylase (n-C16:1)	h[c] + ps161[c] -> co2[c] + pe161[c]	SCO6468	SCO6468		Glycerophospholipid Metabolism	0	0	1000	0	2	4.1.1.65
PSD170	Phosphatidylserine decarboxylase (n-C17:0)	h[c] + ps170[c] -> co2[c] + pe170[c]	SCO6468	SCO6468		Glycerophospholipid Metabolism	0	0	1000	0	2	4.1.1.65
PSD180	Phosphatidylserine decarboxylase (n-C18:0)	h[c] + ps180[c] -> co2[c] + pe180[c]	SCO6468	SCO6468		Glycerophospholipid Metabolism	0	0	1000	0	2	4.1.1.65
PSD181	Phosphatidylserine decarboxylase (n-C18:1)	h[c] + ps181[c] -> co2[c] + pe181[c]	SCO6468	SCO6468		Glycerophospholipid Metabolism	0	0	1000	0	2	4.1.1.65
PSDai150	Phosphatidylserine decarboxylase (ante-iso-C15:0)	h[c] + psai150[c] -> co2[c] + peai150[c]	SCO6468	SCO6468		Glycerophospholipid Metabolism	0	0	1000	0	2	4.1.1.65
PSDai170	Phosphatidylserine decarboxylase (ante-iso-C17:0)	h[c] + psai170[c] -> co2[c] + peai170[c]	SCO6468	SCO6468		Glycerophospholipid Metabolism	0	0	1000	0	2	4.1.1.65
PSDi140	Phosphatidylserine decarboxylase (iso-C14:0)	h[c] + psi140[c] -> co2[c] + pei140[c]	SCO6468	SCO6468		Glycerophospholipid Metabolism	0	0	1000	0	2	4.1.1.65
PSDi150	Phosphatidylserine decarboxylase (iso-C15:0)	h[c] + psi150[c] -> co2[c] + pei150[c]	SCO6468	SCO6468		Glycerophospholipid Metabolism	0	0	1000	0	2	4.1.1.65
PSDi160	Phosphatidylserine decarboxylase (iso-C16:0)	h[c] + psi160[c] -> co2[c] + pei160[c]	SCO6468	SCO6468		Glycerophospholipid Metabolism	0	0	1000	0	2	4.1.1.65
PSDi170	Phosphatidylserine decarboxylase (iso-C17:0)	h[c] + psi170[c] -> co2[c] + pei170[c]	SCO6468	SCO6468		Glycerophospholipid Metabolism	0	0	1000	0	2	4.1.1.65
PSDi180	Phosphatidylserine decarboxylase (iso-C18:0)	h[c] + psi180[c] -> co2[c] + pei180[c]	SCO6468	SCO6468		Glycerophospholipid Metabolism	0	0	1000	0	2	4.1.1.65
PSSA120	Phosphatidylserine syntase (n-C12:0)	cdpdddecg[c] + ser-L[c] -> cmp[c] + h[c] + ps120[c]	SCO6467	SCO6467		Glycerophospholipid Metabolism	0	0	1000	0	2	2.7.8.8		Sandoval-Calderón M, Geiger O, Guan Z, Barona-Gómez F, Sohlenkamp C.#2009#A eukaryote-like cardiolipin synthase is present in Streptomyces coelicolor and in most actinobacteria.#J Biol Chem.#284#17383-17390#
PSSA140	Phosphatidylserine syntase (n-C14:0)	cdpdtdecg[c] + ser-L[c] -> cmp[c] + h[c] + ps140[c]	SCO6467	SCO6467		Glycerophospholipid Metabolism	0	0	1000	0	2	2.7.8.8		Sandoval-Calderón M, Geiger O, Guan Z, Barona-Gómez F, Sohlenkamp C.#2009#A eukaryote-like cardiolipin synthase is present in Streptomyces coelicolor and in most actinobacteria.#J Biol Chem.#284#17383-17390#
PSSA141	Phosphatidylserine syntase (n-C14:1)	cdpdtdec7eg[c] + ser-L[c] -> cmp[c] + h[c] + ps141[c]	SCO6467	SCO6467		Glycerophospholipid Metabolism	0	0	1000	0	2	2.7.8.8		Sandoval-Calderón M, Geiger O, Guan Z, Barona-Gómez F, Sohlenkamp C.#2009#A eukaryote-like cardiolipin synthase is present in Streptomyces coelicolor and in most actinobacteria.#J Biol Chem.#284#17383-17390#
PSSA150	Phosphatidylserine syntase (n-C15:0)	cdpdptdecg[c] + ser-L[c] -> cmp[c] + h[c] + ps150[c]	SCO6467	SCO6467		Glycerophospholipid Metabolism	0	0	1000	0	2	2.7.8.8		Sandoval-Calderón M, Geiger O, Guan Z, Barona-Gómez F, Sohlenkamp C.#2009#A eukaryote-like cardiolipin synthase is present in Streptomyces coelicolor and in most actinobacteria.#J Biol Chem.#284#17383-17390#
PSSA160	Phosphatidylserine syntase (n-C16:0)	cdpdhdecg[c] + ser-L[c] -> cmp[c] + h[c] + ps160[c]	SCO6467	SCO6467		Glycerophospholipid Metabolism	0	0	1000	0	2	2.7.8.8		Sandoval-Calderón M, Geiger O, Guan Z, Barona-Gómez F, Sohlenkamp C.#2009#A eukaryote-like cardiolipin synthase is present in Streptomyces coelicolor and in most actinobacteria.#J Biol Chem.#284#17383-17390#
PSSA161	Phosphatidylserine syntase (n-C16:1)	cdpdhdec9eg[c] + ser-L[c] -> cmp[c] + h[c] + ps161[c]	SCO6467	SCO6467		Glycerophospholipid Metabolism	0	0	1000	0	2	2.7.8.8		Sandoval-Calderón M, Geiger O, Guan Z, Barona-Gómez F, Sohlenkamp C.#2009#A eukaryote-like cardiolipin synthase is present in Streptomyces coelicolor and in most actinobacteria.#J Biol Chem.#284#17383-17390#
PSSA170	Phosphatidylserine syntase (n-C17:0)	cdpdhepdecg[c] + ser-L[c] -> cmp[c] + h[c] + ps170[c]	SCO6467	SCO6467		Glycerophospholipid Metabolism	0	0	1000	0	2	2.7.8.8		Sandoval-Calderón M, Geiger O, Guan Z, Barona-Gómez F, Sohlenkamp C.#2009#A eukaryote-like cardiolipin synthase is present in Streptomyces coelicolor and in most actinobacteria.#J Biol Chem.#284#17383-17390#
PSSA180	Phosphatidylserine syntase (n-C18:0)	cdpdodecg[c] + ser-L[c] -> cmp[c] + h[c] + ps180[c]	SCO6467	SCO6467		Glycerophospholipid Metabolism	0	0	1000	0	2	2.7.8.8		Sandoval-Calderón M, Geiger O, Guan Z, Barona-Gómez F, Sohlenkamp C.#2009#A eukaryote-like cardiolipin synthase is present in Streptomyces coelicolor and in most actinobacteria.#J Biol Chem.#284#17383-17390#
PSSA181	Phosphatidylserine syntase (n-C18:1)	cdpdodec11eg[c] + ser-L[c] -> cmp[c] + h[c] + ps181[c]	SCO6467	SCO6467		Glycerophospholipid Metabolism	0	0	1000	0	2	2.7.8.8		Sandoval-Calderón M, Geiger O, Guan Z, Barona-Gómez F, Sohlenkamp C.#2009#A eukaryote-like cardiolipin synthase is present in Streptomyces coelicolor and in most actinobacteria.#J Biol Chem.#284#17383-17390#
PSSAai150	Phosphatidylserine syntase (ante-iso-C15:0)	cdpdaiC15g[c] + ser-L[c] -> cmp[c] + h[c] + psai150[c]	SCO6467	SCO6467		Glycerophospholipid Metabolism	0	0	1000	0	2	2.7.8.8		Sandoval-Calderón M, Geiger O, Guan Z, Barona-Gómez F, Sohlenkamp C.#2009#A eukaryote-like cardiolipin synthase is present in Streptomyces coelicolor and in most actinobacteria.#J Biol Chem.#284#17383-17390#
PSSAai170	Phosphatidylserine syntase (ante-iso-C17:0)	cdpdaiC17g[c] + ser-L[c] -> cmp[c] + h[c] + psai170[c]	SCO6467	SCO6467		Glycerophospholipid Metabolism	0	0	1000	0	2	2.7.8.8		Sandoval-Calderón M, Geiger O, Guan Z, Barona-Gómez F, Sohlenkamp C.#2009#A eukaryote-like cardiolipin synthase is present in Streptomyces coelicolor and in most actinobacteria.#J Biol Chem.#284#17383-17390#
PSSAi140	Phosphatidylserine syntase (iso-C14:0)	cdpdiC14g[c] + ser-L[c] -> cmp[c] + h[c] + psi140[c]	SCO6467	SCO6467		Glycerophospholipid Metabolism	0	0	1000	0	2	2.7.8.8		Sandoval-Calderón M, Geiger O, Guan Z, Barona-Gómez F, Sohlenkamp C.#2009#A eukaryote-like cardiolipin synthase is present in Streptomyces coelicolor and in most actinobacteria.#J Biol Chem.#284#17383-17390#
PSSAi150	Phosphatidylserine syntase (iso-C15:0)	cdpdiC15g[c] + ser-L[c] -> cmp[c] + h[c] + psi150[c]	SCO6467	SCO6467		Glycerophospholipid Metabolism	0	0	1000	0	2	2.7.8.8		Sandoval-Calderón M, Geiger O, Guan Z, Barona-Gómez F, Sohlenkamp C.#2009#A eukaryote-like cardiolipin synthase is present in Streptomyces coelicolor and in most actinobacteria.#J Biol Chem.#284#17383-17390#
PSSAi160	Phosphatidylserine syntase (iso-C16:0)	cdpdiC16g[c] + ser-L[c] -> cmp[c] + h[c] + psi160[c]	SCO6467	SCO6467		Glycerophospholipid Metabolism	0	0	1000	0	2	2.7.8.8		Sandoval-Calderón M, Geiger O, Guan Z, Barona-Gómez F, Sohlenkamp C.#2009#A eukaryote-like cardiolipin synthase is present in Streptomyces coelicolor and in most actinobacteria.#J Biol Chem.#284#17383-17390#
PSSAi170	Phosphatidylserine syntase (iso-C17:0)	cdpdiC17g[c] + ser-L[c] -> cmp[c] + h[c] + psi170[c]	SCO6467	SCO6467		Glycerophospholipid Metabolism	0	0	1000	0	2	2.7.8.8		Sandoval-Calderón M, Geiger O, Guan Z, Barona-Gómez F, Sohlenkamp C.#2009#A eukaryote-like cardiolipin synthase is present in Streptomyces coelicolor and in most actinobacteria.#J Biol Chem.#284#17383-17390#
PSSAi180	Phosphatidylserine syntase (iso-C18:0)	cdpdiC18g[c] + ser-L[c] -> cmp[c] + h[c] + psi180[c]	SCO6467	SCO6467		Glycerophospholipid Metabolism	0	0	1000	0	2	2.7.8.8		Sandoval-Calderón M, Geiger O, Guan Z, Barona-Gómez F, Sohlenkamp C.#2009#A eukaryote-like cardiolipin synthase is present in Streptomyces coelicolor and in most actinobacteria.#J Biol Chem.#284#17383-17390#
DGAT120	diacylglycerol O-acyltransferase	12dgr120[c] + ddcacoa[c] -> coa[c] + tag120[c]	SCO0958	SCO0958		Glycerophospholipid Metabolism	0	0	1000	0	1	2.4.1.20	Required for growth (triacylglycerol biosynthesis)	Arabolaza A, Rodriguez E, Altabe S, Alvarez H, Gramajo H.#2008#Multiple Pathways for Triacylglycerol Biosynthesis in
DGAT140	diacylglycerol O-acyltransferase	12dgr140[c] + tdcoa[c] -> coa[c] + tag140[c]	SCO0958	SCO0958		Glycerophospholipid Metabolism	0	0	1000	0	1	2.4.1.20	Required for growth (triacylglycerol biosynthesis)	Arabolaza A, Rodriguez E, Altabe S, Alvarez H, Gramajo H.#2008#Multiple Pathways for Triacylglycerol Biosynthesis in
DGAT141	diacylglycerol O-acyltransferase	12dgr141[c] + tdecoa[c] -> coa[c] + tag141[c]	SCO0958	SCO0958		Glycerophospholipid Metabolism	0	0	1000	0	1	2.4.1.20	Required for growth (triacylglycerol biosynthesis)	Arabolaza A, Rodriguez E, Altabe S, Alvarez H, Gramajo H.#2008#Multiple Pathways for Triacylglycerol Biosynthesis in
DGAT150	diacylglycerol O-acyltransferase	12dgr150[c] + ptdcoa[c] -> coa[c] + tag150[c]	SCO0958	SCO0958		Glycerophospholipid Metabolism	0	0	1000	0	1	2.4.1.20	Required for growth (triacylglycerol biosynthesis)	Arabolaza A, Rodriguez E, Altabe S, Alvarez H, Gramajo H.#2008#Multiple Pathways for Triacylglycerol Biosynthesis in
DGAT160	diacylglycerol O-acyltransferase	12dgr160[c] + pmtcoa[c] -> coa[c] + tag160[c]	SCO0958	SCO0958		Glycerophospholipid Metabolism	0	0	1000	0	1	2.4.1.20	Required for growth (triacylglycerol biosynthesis)	Arabolaza A, Rodriguez E, Altabe S, Alvarez H, Gramajo H.#2008#Multiple Pathways for Triacylglycerol Biosynthesis in
DGAT161	diacylglycerol O-acyltransferase	12dgr161[c] + hdcoa[c] -> coa[c] + tag161[c]	SCO0958	SCO0958		Glycerophospholipid Metabolism	0	0	1000	0	1	2.4.1.20	Required for growth (triacylglycerol biosynthesis)	Arabolaza A, Rodriguez E, Altabe S, Alvarez H, Gramajo H.#2008#Multiple Pathways for Triacylglycerol Biosynthesis in
DGAT170	diacylglycerol O-acyltransferase	12dgr170[c] + hepdcoa[c] -> coa[c] + tag170[c]	SCO0958	SCO0958		Glycerophospholipid Metabolism	0	0	1000	0	1	2.4.1.20	Required for growth (triacylglycerol biosynthesis)	Arabolaza A, Rodriguez E, Altabe S, Alvarez H, Gramajo H.#2008#Multiple Pathways for Triacylglycerol Biosynthesis in
DGAT180	diacylglycerol O-acyltransferase	12dgr180[c] + stcoa[c] -> coa[c] + tag180[c]	SCO0958	SCO0958		Glycerophospholipid Metabolism	0	0	1000	0	1	2.4.1.20	Required for growth (triacylglycerol biosynthesis)	Arabolaza A, Rodriguez E, Altabe S, Alvarez H, Gramajo H.#2008#Multiple Pathways for Triacylglycerol Biosynthesis in
DGAT181	diacylglycerol O-acyltransferase	12dgr181[c] + odecoa[c] -> coa[c] + tag181[c]	SCO0958	SCO0958		Glycerophospholipid Metabolism	0	0	1000	0	1	2.4.1.20	Required for growth (triacylglycerol biosynthesis)	Arabolaza A, Rodriguez E, Altabe S, Alvarez H, Gramajo H.#2008#Multiple Pathways for Triacylglycerol Biosynthesis in
DGATai150	diacylglycerol O-acyltransferase	12dgrai150[c] + ptdcoa[c] -> coa[c] + tagai150[c]	SCO0958	SCO0958		Glycerophospholipid Metabolism	0	0	1000	0	1	2.4.1.20	Required for growth (triacylglycerol biosynthesis)	Arabolaza A, Rodriguez E, Altabe S, Alvarez H, Gramajo H.#2008#Multiple Pathways for Triacylglycerol Biosynthesis in
DGATai170	diacylglycerol O-acyltransferase	12dgrai170[c] + hepdcoa[c] -> coa[c] + tagai170[c]	SCO0958	SCO0958		Glycerophospholipid Metabolism	0	0	1000	0	1	2.4.1.20	Required for growth (triacylglycerol biosynthesis)	Arabolaza A, Rodriguez E, Altabe S, Alvarez H, Gramajo H.#2008#Multiple Pathways for Triacylglycerol Biosynthesis in
DGATi140	diacylglycerol O-acyltransferase	12dgri140[c] + tdcoa[c] -> coa[c] + tagi140[c]	SCO0958	SCO0958		Glycerophospholipid Metabolism	0	0	1000	0	1	2.4.1.20	Required for growth (triacylglycerol biosynthesis)	Arabolaza A, Rodriguez E, Altabe S, Alvarez H, Gramajo H.#2008#Multiple Pathways for Triacylglycerol Biosynthesis in
DGATi150	diacylglycerol O-acyltransferase	12dgri150[c] + ptdcoa[c] -> coa[c] + tagi150[c]	SCO0958	SCO0958		Glycerophospholipid Metabolism	0	0	1000	0	1	2.4.1.20	Required for growth (triacylglycerol biosynthesis)	Arabolaza A, Rodriguez E, Altabe S, Alvarez H, Gramajo H.#2008#Multiple Pathways for Triacylglycerol Biosynthesis in
DGATi160	diacylglycerol O-acyltransferase	12dgri160[c] + pmtcoa[c] -> coa[c] + tagi160[c]	SCO0958	SCO0958		Glycerophospholipid Metabolism	0	0	1000	0	1	2.4.1.20	Required for growth (triacylglycerol biosynthesis)	Arabolaza A, Rodriguez E, Altabe S, Alvarez H, Gramajo H.#2008#Multiple Pathways for Triacylglycerol Biosynthesis in
DGATi170	diacylglycerol O-acyltransferase	12dgri170[c] + hepdcoa[c] -> coa[c] + tagi170[c]	SCO0958	SCO0958		Glycerophospholipid Metabolism	0	0	1000	0	1	2.4.1.20	Required for growth (triacylglycerol biosynthesis)	Arabolaza A, Rodriguez E, Altabe S, Alvarez H, Gramajo H.#2008#Multiple Pathways for Triacylglycerol Biosynthesis in
DGATi180	diacylglycerol O-acyltransferase	12dgri180[c] + odecoa[c] -> coa[c] + tagi180[c]	SCO0958	SCO0958		Glycerophospholipid Metabolism	0	0	1000	0	1	2.4.1.20	Required for growth (triacylglycerol biosynthesis)	Arabolaza A, Rodriguez E, Altabe S, Alvarez H, Gramajo H.#2008#Multiple Pathways for Triacylglycerol Biosynthesis in
GHMT2	glycine hydroxymethyltransferase	ser-L[c] + thf[c] -> gly[c] + h2o[c] + mlthf[c]	(SCO4837 or SCO5470 or SCO5364)	SCO4837 SCO5470 SCO5364	glyA1 glyA2 glyA3	Glycine and Serine Metabolism	0	0	1000	0	2	2.1.2.1
GLYAT	glycine C-acetyltransferase	accoa[c] + gly[c] <=> 2aobut[c] + coa[c]	SCO6800	SCO6800	kbl	Glycine and Serine Metabolism	1	-1000	1000	0	2	2.3.1.29
GLYCK2	glycerate kinase	atp[c] + glyc-R[c] -> 2pg[c] + adp[c] + h[c]	(SCO2145 or SCO6466)	SCO2145 SCO6466		Glycine and Serine Metabolism	0	0	1000	0	2	2.7.1.31
PGCD	phosphoglycerate dehydrogenase	3pg[c] + nad[c] -> 3php[c] + h[c] + nadh[c]	SCO5515	SCO5515	serA	Glycine and Serine Metabolism	0	0	1000	0	2	1.1.1.95
PSERT	phosphoserine transaminase	3php[c] + glu-L[c] -> akg[c] + pser-L[c]	SCO4366	SCO4366		Glycine and Serine Metabolism	0	0	1000	0	2	2.6.1.52
PSP_L	phosphoserine phosphatase (L-serine)	h2o[c] + pser-L[c] -> pi[c] + ser-L[c]	SCO1808	SCO1808		Glycine and Serine Metabolism	0	0	1000	0	2	3.1.3.3
SERD_L	L-serine deaminase	ser-L[c] -> nh4[c] + pyr[c]	(SCO0821 or SCO4962 or SCO5469)	SCO0821 SCO4962 SCO5469	sdaA	Glycine and Serine Metabolism	0	0	1000	0	2	4.3.1.17
THRD	L-threonine dehydrogenase	nad[c] + thr-L[c] -> 2aobut[c] + h[c] + nadh[c]	SCO6799	SCO6799	tdh	Glycine and Serine Metabolism	0	0	1000	0	2	1.1.1.103
ENO	enolase	2pg[c] <=> h2o[c] + pep[c]	(SCO3096 or SCO7638)	SCO3096 SCO7638	eno eno2	Glycolysis/Gluconeogenesis	1	-1000	1000	0	2	4.2.1.11
FBA	fructose-bisphosphate aldolase	fdp[c] <=> dhap[c] + g3p[c]	SCO3649	SCO3649	fba	Glycolysis/Gluconeogenesis	1	-1000	1000	0	2	4.1.2.13
FBA2	D-Fructose 1-phosphate D-glyceraldehyde-3-phosphate-lyase	f1p[c] <=> dhap[c] + glyald[c]	SCO3649	SCO3649	fba	Glycolysis/Gluconeogenesis	1	-1000	1000	0	2	4.1.2.13
FBP	fructose-bisphosphatase	fdp[c] + h2o[c] -> f6p[c] + pi[c]	SCO5047	SCO5047	glpX	Glycolysis/Gluconeogenesis	0	0	1000	0	2	3.1.3.11
GAPD	glyceraldehyde-3-phosphate dehydrogenase	g3p[c] + nad[c] + pi[c] <=> 13dpg[c] + h[c] + nadh[c]	(SCO1947 or SCO7040 or SCO7511)	SCO1947 SCO7040 SCO7511	gap1 gap2	Glycolysis/Gluconeogenesis	1	-1000	1000	0	2	1.2.1.12
GLBRAN2	1,4-alpha-glucan branching enzyme (glycogen -> bglycogen)	glycogen[c] -> bglycogen[c]	(SCO5440 or SCO7332)	SCO5440 SCO7332	glgBI glgBII	Glycolysis/Gluconeogenesis	0	0	1000	0	3	2.4.1.18		Bruton CJ, Plaskitt KA, Chater KF.#1995#Tissue-specific glycogen branching isoenzymes in a multicellular prokaryote, Streptomyces coelicolor A3(2).#Mol Microbiol.#18#89-99#
GLCP	glycogen phosphorylase	glycogen[c] + pi[c] -> g1p[c]	SCO5444	SCO5444	glgP	Glycolysis/Gluconeogenesis	0	0	1000	0	2	2.4.1.1
GLCP2	glycogen phosphorylase	bglycogen[c] + pi[c] -> g1p[c]	SCO5444	SCO5444	glgP	Glycolysis/Gluconeogenesis	0	0	1000	0	2	2.4.1.1
GLCS1	glycogen synthase (ADPGlc)	adpglc[c] -> adp[c] + glycogen[c] + h[c]	SCO0962	SCO0962	glgA	Glycolysis/Gluconeogenesis	0	0	1000	0	2	2.4.1.21
GLDBRAN2	glycogen debranching enzyme (bglycogen -> glycogen)	bglycogen[c] -> glycogen[c]	(SCO7338 or SCO5456 or SCO6082)	SCO7338 SCO5456 SCO6082	glgX glgX2 glgX3	Glycolysis/Gluconeogenesis	0	0	1000	0	2
GLGC	glucose-1-phosphate adenylyltransferase	atp[c] + g1p[c] + h[c] -> adpglc[c] + ppi[c]	SCO0961	SCO0961	glgC	Glycolysis/Gluconeogenesis	0	0	1000	0	3	2.7.7.27		Martin MC, Schneider D, Bruton CJ, Chater KF, Hardisson C.#1997#A glgC gene essential only for the first of two spatially distinct phases of glycogen synthesis in Streptomyces coelicolor A3(2).#J Bacteriol.#179#7784-7789#
GLGCc	glucose-1-phosphate cytidylyltransferase	ctp[c] + g1p[c] + h[c] -> cdpglc[c] + ppi[c]	SCO0393	SCO0393	glgCI	Glycolysis/Gluconeogenesis	0	0	1000	0	2	2.7.7.27
HEX1	glucokinase (D-glucose:ATP)	atp[c] + glc-D[c] -> adp[c] + g6p[c] + h[c]	(SCO2126 or SCO6260 or SCO1077 or (SCO4145 and SCO5059))	SCO2126 SCO6260 SCO1077 SCO4145 SCO5059	glk ppgK ppk	Glycolysis/Gluconeogenesis	0	0	1000	0	4	2.7.1.2		Mahr,K., G.P.van Wezel, C.Svensson, U.Krengel, M.J.Bibb, and F.Titgemeyer.#2000#Glucose kinase of Streptomyces coelicolor A3(2): large-scale purification and biochemical analysis#Antonie Van Leeuwenhoek#78#253-261##Imriskova I, Arreguín-Espinosa R, Guzmán S, Rodriguez-Sanoja R, Langley E, Sanchez S.#2005#Biochemical characterization of the glucose kinase from Streptomyces coelicolor compared to S…
PDH	pyruvate dehydrogenase	coa[c] + nad[c] + pyr[c] -> accoa[c] + co2[c] + nadh[c]	((SCO2183 or SCO2371 or SCO7124 or (SCO1269 and SCO1270)) and (SCO3815 or SCO3829) and (SCO0884 or SCO2180 or SCO4919))	SCO2183 SCO2371 SCO7124 SCO1269 SCO1270 SCO3815 SCO3829 SCO0884 SCO2180 SCO4919	aceE1 aceE2 aceE3 bkdC1 bkdC2 udrA pdhL	Glycolysis/Gluconeogenesis	0	0	1000	0	2
PFK	phosphofructokinase	atp[c] + f6p[c] -> adp[c] + fdp[c] + h[c]	(SCO5426 or SCO2119 or SCO1214)	SCO5426 SCO2119 SCO1214	pfkA2 pfkA pfkA3	Glycolysis/Gluconeogenesis	0	0	1000	0	4	2.7.1.11		Alves,A.M., G.J.Euverink, M.J.Bibb, and L.Dijkhuizen.#1997#Identification of ATP-dependent phosphofructokinase as a regulatory step in the glycolytic pathway of the actinomycete Streptomyces coelicolor A3(2)#Appl. Environ. Microbiol.#63#956-961##Borodina I, Siebring J, Zhang J, Smith CP, van Keulen G, Dijkhuizen L, Nielsen J.#2008#Antibiotic overproduction in Streptomyces coelicolor A3 2 mediated…
PGI	glucose-6-phosphate isomerase	g6p[c] <=> f6p[c]	(SCO1942 or SCO6659)	SCO1942 SCO6659	pgi2	Glycolysis/Gluconeogenesis	1	-1000	1000	0	2	5.3.1.9
PGK	phosphoglycerate kinase	3pg[c] + atp[c] <=> 13dpg[c] + adp[c]	SCO1946	SCO1946	pgk	Glycolysis/Gluconeogenesis	1	-1000	1000	0	2	2.7.2.3
PGM	phosphoglycerate mutase	2pg[c] <=> 3pg[c]	(SCO2576 or SCO4209 or SCO6818)	SCO2576 SCO4209 SCO6818	pgm pgm2	Glycolysis/Gluconeogenesis	1	-1000	1000	0	4	5.4.2.1		White,P.J., J.Nairn, N.C.Price, H.G.Nimmo, J.R.Coggins, and I.S.Hunter.#1992#Phosphoglycerate mutase from Streptomyces coelicolor A3(2): purification and characterization of the enzyme and cloning and sequence analysis of the gene.#J. Bacteriol.#174#434-440#
PPDK	Pyruvate,phosphate dikinase	atp[c] + pi[c] + pyr[c] -> amp[c] + h[c] + pep[c] + ppi[c]	(SCO0208 or SCO2494)	SCO0208 SCO2494		Glycolysis/Gluconeogenesis	0	0	1000	0	2	2.7.9.1
PYK	pyruvate kinase	adp[c] + h[c] + pep[c] -> atp[c] + pyr[c]	(SCO2014 or SCO5423)	SCO2014 SCO5423	pyk1 pyk2	Glycolysis/Gluconeogenesis	0	0	1000	0	2	2.7.1.40
TPI	triose-phosphate isomerase	dhap[c] <=> g3p[c]	(SCO0578 or SCO1945)	SCO0578 SCO1945	tpiA	Glycolysis/Gluconeogenesis	1	-1000	1000	0	2	5.3.1.1
GLXCL	glyoxalate carboligase	2 glx[c] + h[c] -> 2h3oppan[c] + co2[c]	SCO6201	SCO6201	gcl	Glyoxylate Metabolism	0	0	1000	0	2	4.1.1.47
GLYCK	glycerate kinase	atp[c] + glyc-R[c] -> 3pg[c] + adp[c] + h[c]	(SCO2145 or SCO6466)	SCO2145 SCO6466		Glyoxylate Metabolism	0	0	1000	0	2	2.7.1.31
ATPPRT	ATP phosphoribosyltransferase	atp[c] + prpp[c] -> ppi[c] + prbatp[c]	SCO1438	SCO1438	hisG	Histidine Metabolism	0	0	1000	0	2	2.4.2.17
FGLU	formimidoylglutamase	forglu[c] + h[c] + h2o[c] -> frmd[c] + glu-L[c]				Histidine Metabolism	0	0	1000	0	1	3.5.3.8	Required for growth using L-histidine as a carbon source
FORAMD	formamidase	frmd[c] + h2o[c] -> for[c] + nh4[c]				Histidine Metabolism	0	0	1000	0	1	3.5.1.49	Required for growth using L-histidine as a carbon source
HISD	histidase	his-L[c] -> nh4[c] + urcan[c]	SCO4932	SCO4932	hutH	Histidine Metabolism	0	0	1000	0	2	4.3.1.3
HISTD	histidinol dehydrogenase	h2o[c] + histd[c] + 2 nad[c] -> 3 h[c] + his-L[c] + 2 nadh[c]	SCO2054	SCO2054	hisD	Histidine Metabolism	0	0	1000	0	3	1.1.1.23		Limauro D, Avitabile A, Puglia AM, Bruni CB.#1992#Further characterization of the histidine gene cluster of Streptomyces coelicolor A3(2): nucleotide sequence and transcriptional analysis of hisD.#Res Microbiol.#143#683-693#
HISTP	histidinol-phosphatase	h2o[c] + hisp[c] -> histd[c] + pi[c]	SCO5208	SCO5208		Histidine Metabolism	0	0	1000	0	2	3.1.3.15
HSTPT	histidinol-phosphate transaminase	glu-L[c] + imacp[c] -> akg[c] + hisp[c]	(SCO1859 or SCO2053 or SCO3944)	SCO1859 SCO2053 SCO3944	hisC1 hisC2	Histidine Metabolism	0	0	1000	0	2	2.6.1.9
IG3PS	Imidazole-glycerol-3-phosphate synthase	gln-L[c] + prlp[c] -> aicar[c] + eig3p[c] + glu-L[c] + h[c]	(SCO2048 and SCO2051)	SCO2048 SCO2051	hisF hisH	Histidine Metabolism	0	0	1000	0	2
IGPDH	imidazoleglycerol-phosphate dehydratase	eig3p[c] -> h2o[c] + imacp[c]	SCO2052	SCO2052	hisB	Histidine Metabolism	0	0	1000	0	3	4.2.1.19		Limauro D, Avitabile A, Cappellano C, Puglia AM, Bruni CB.#1990#Cloning and characterization of the histidine biosynthetic gene cluster of Streptomyces coelicolor A3(2).#Gene.#90#31-41#
IZPN	imidazolonepropionase	4izp[c] + h2o[c] -> forglu[c] + h[c]	SCO3070	SCO3070		Histidine Metabolism	0	0	1000	0	2	3.5.2.7
PRAMPC	phosphoribosyl-AMP cyclohydrolase	h2o[c] + prbamp[c] -> prfp[c]	SCO2044	SCO2044	hisL	Histidine Metabolism	0	0	1000	0	2	3.5.4.19
PRATPP	phosphoribosyl-ATP pyrophosphatase	h2o[c] + prbatp[c] -> h[c] + ppi[c] + prbamp[c]	SCO1439	SCO1439	hisE	Histidine Metabolism	0	0	1000	0	2	3.6.1.31
PRMICIi	1-(5-phosphoribosyl)-5-[(5-phosphoribosylamino)methylideneamino)imidazole-4-carboxamide isomerase (irreversible)	prfp[c] -> prlp[c]	SCO2050	SCO2050	priA	Histidine Metabolism	0	0	1000	0	4	5.3.1.16		Noda-García L, Camacho-Zarco AR, Verdel-Aranda K, Wright H, Soberón X, Fülöp V, Barona-Gómez F.#2010#Identification and analysis of residues contained on beta --> alpha loops of the dual-substrate (beta alpha)8 phosphoribosyl isomerase A specific for its phosphoribosyl anthranilate isomerase activity.#Protein Sci.#19#535-543#
PRPPS	phosphoribosylpyrophosphate synthetase	atp[c] + r5p[c] <=> amp[c] + h[c] + prpp[c]	(SCO0782 or SCO3123)	SCO0782 SCO3123	prsA prsA2	Histidine Metabolism	1	-1000	1000	0	2	2.7.6.1
URCN	urocanase	urcan[c] + h2o[c] -> 4izp[c]	SCO3073	SCO3073	hutU	Histidine Metabolism	0	0	1000	0	2	4.2.1.49
ASR	arsenate reductase	aso4[c] + 2 msh[c] -> aso3[c] + mssg[c] + h2o[c]	(SCO2206 or SCO6835)	SCO2206 SCO6835	arsC	Inorganic Ion Transport and Metabolism	0	0	1000	0	2			$Corynebacterium glutamicum#Ordóñez E, Van Belle K, Roos G, De Galan S, Letek M, Gil JA, Wyns L, Mateos LM, Messens J.#2009#Arsenate reductase, mycothiol, and mycoredoxin concert thiol/disulfide exchange.#J Biol Chem.#284#15107-15116#
CA2t4	calcium (Ca+2) transport in/out via proton antiport	ca2[c] + h[e] <=> h[c] + ca2[e]	SCO1962	SCO1962		Inorganic Ion Transport and Metabolism	1	-1000	1000	0	2
CD2abc	Cadmium (Cd+2) ABC transporter	atp[c] + cd2[c] + h2o[c] -> adp[c] + h[c] + pi[c] + cd2[e]	SCO6460	SCO6460		Inorganic Ion Transport and Metabolism	0	0	1000	0	2
CD2t4	cadmium (Cd+2) transport in/out via proton antiport	cd2[c] + h[e] <=> h[c] + cd2[e]	(SCO0776 or SCO1310 or SCO2772 or SCO6751)	SCO0776 SCO1310 SCO2772 SCO6751		Inorganic Ion Transport and Metabolism	1	-1000	1000	0	2
CLt3_2	chloride transport out via proton antiport (2:1)	h[c] + 2 cl[e] -> 2 cl[c] + h[e]	(SCO5964 or SCO6320)	SCO5964 SCO6320		Inorganic Ion Transport and Metabolism	0	0	1000	0	2
COBALT2t	cobalt transport in via permease (no H+)	cobalt2[e] -> cobalt2[c]	(SCO1667 or SCO5157)	SCO1667 SCO5157		Inorganic Ion Transport and Metabolism	0	0	1000	0	2
COBALT2t3	cobalt (Co+2) transport out via proton antiport	cobalt2[c] + h[e] -> h[c] + cobalt2[e]	(SCO0776 or SCO1310 or SCO2772 or SCO6751)	SCO0776 SCO1310 SCO2772 SCO6751		Inorganic Ion Transport and Metabolism	0	0	1000	0	2
COELICHELINabc	ferricoelichelin transport via ABC system	atp[c] + h2o[c] + ferricoelichelin[e] -> adp[c] + ferricoelichelin[c] + h[c] + pi[c]	((SCO0495 and SCO0496 and SCO0497 and SCO0494) or (SCO7398 and SCO7399 and SCO7400))	SCO0495 SCO0496 SCO0497 SCO0494 SCO7398 SCO7399 SCO7400	cchE cchD cchC cchF cdtA cdtB cdtC	Inorganic Ion Transport and Metabolism	0	0	1000	0	4			Patel P, Song L, Challis GL.#2010#Distinct extracytoplasmic siderophore binding proteins recognize ferrioxamines and ferricoelichelin in Streptomyces coelicolor A3(2).#Biochemistry.#49#8033-8042#
COELICHELINexs	coelichelin Fe-loading reaction (spontaneaous)	fe3[e] + coelichelin[e] -> ferricoelichelin[e]	s0001	s0001	SPONTANEOUS	Inorganic Ion Transport and Metabolism	0	0	1000	0	1		Iron uptake using coelichelin system, spontaneous reaction
COELICHELINR1	ferricoelichelin reductase	fadh2[c] + 2 ferricoelichelin[c] -> fad[c] + 2 fe2[c] + 2 coelichelin[c] + 2 h[c]				Inorganic Ion Transport and Metabolism	0	0	1000	0	1		Iron uptake using coelichelin system
COELICHELINR2	ferricoelichelin reductase	2 ferricoelichelin[c] + fmnh2[c] -> 2 fe2[c] + 2 coelichelin[c] + fmn[c] + 2 h[c]				Inorganic Ion Transport and Metabolism	0	0	1000	0	1		Iron uptake using coelichelin system
COELICHELINR3	ferricoelichelin reductase	2 ferricoelichelin[c] + rbflvrd[c] -> 2 fe2[c] + 2 coelichelin[c] + 2 h[c] + ribflv[c]				Inorganic Ion Transport and Metabolism	0	0	1000	0	1		Iron uptake using coelichelin system
COELICHELINUt	coelichelin secretion	coelichelin[c] + h[e] -> h[c] + coelichelin[e]	(SCO0491 and SCO0493)	SCO0491 SCO0493	cchI cchG	Inorganic Ion Transport and Metabolism	0	0	1000	0	2		Iron uptake using coelichelin system
CU1abc	Copper (Cu +1) ABC transporter	atp[c] + cu[c] + h2o[c] -> adp[c] + h[c] + pi[c] + cu[e]	(SCO1046 or SCO2731)	SCO1046 SCO2731		Inorganic Ion Transport and Metabolism	0	0	1000	0	2
CU1O	Cuprous Oxidase (Cu+1)	4 cu[c] + 4 h[c] + o2[c] -> 4 cu2[c] + 2 h2o[c]	((SCO3439 and SCO3440) and SCO6712)	SCO3439 SCO3440 SCO6712		Inorganic Ion Transport and Metabolism	0	0	1000	0	2
CU2abc	Copper (Cu+2) ABC transporter	atp[c] + cu2[c] + h2o[c] -> adp[c] + h[c] + pi[c] + cu2[e]	SCO6460	SCO6460		Inorganic Ion Transport and Metabolism	0	0	1000	0	2
CU2t	copper transport in via permease (no H+)	cu2[e] -> cu2[c]				Inorganic Ion Transport and Metabolism	0	0	1000	0	1		Required for growth (copper uptake)
CUt3	copper transport in via proton antiport	cu[e] + h[c] -> h[e] + cu[c]				Inorganic Ion Transport and Metabolism	0	0	1000	0	1		To utilize cu(I)
FE2t2	iron (II) transport in via proton symport	fe2[e] + h[e] -> fe2[c] + h[c]	SCO4993	SCO4993		Inorganic Ion Transport and Metabolism	0	0	1000	0	2
FE2t3	iron (Fe+2) transport out via proton antiport	fe2[c] + h[e] -> h[c] + fe2[e]	(SCO0776 or SCO1310 or SCO2772 or SCO6751)	SCO0776 SCO1310 SCO2772 SCO6751		Inorganic Ion Transport and Metabolism	0	0	1000	0	2
FE3abc	iron (III) transport via ABC system	atp[c] + h2o[c] + fe3[e] -> adp[c] + fe3[c] + h[c] + pi[c]	(SCO5923 and SCO5924 and SCO5925)	SCO5923 SCO5924 SCO5925		Inorganic Ion Transport and Metabolism	0	0	1000	0	2
FEOXAMBabc	ferrioxamine B transport via ABC system	atp[c] + h2o[c] + ferrioxamB[e] -> adp[c] + ferrioxamB[c] + h[c] + pi[c]	((SCO7398 and SCO7399 and SCO7400) or SCO2780)	SCO7398 SCO7399 SCO7400 SCO2780	cdtA cdtB cdtC desE	Inorganic Ion Transport and Metabolism	0	0	1000	0	4			Patel P, Song L, Challis GL.#2010#Distinct extracytoplasmic siderophore binding proteins recognize ferrioxamines and ferricoelichelin in Streptomyces coelicolor A3(2).#Biochemistry.#49#8033-8042#
FEOXAMBexs	desferrioxamine B Fe-loading reaction (spontaneaous)	fe3[e] + desferrioxamB[e] -> ferrioxamB[e]	s0001	s0001	SPONTANEOUS	Inorganic Ion Transport and Metabolism	0	0	1000	0	1		Iron uptake using desferrioxamine B system, spontaneous reaction
FEOXAMBR1	ferrioxamine B reductase	fadh2[c] + 2 ferrioxamB[c] -> fad[c] + 2 fe2[c] + 2 desferrioxamB[c] + 2 h[c]				Inorganic Ion Transport and Metabolism	0	0	1000	0	1		Iron uptake using desferrioxamine B system
FEOXAMBR2	ferrioxamine B reductase	2 ferrioxamB[c] + fmnh2[c] -> 2 fe2[c] + 2 desferrioxamB[c] + fmn[c] + 2 h[c]				Inorganic Ion Transport and Metabolism	0	0	1000	0	1		Iron uptake using desferrioxamine B system
FEOXAMBR3	ferrioxamine B reductase	2 ferrioxamB[c] + rbflvrd[c] -> 2 fe2[c] + 2 desferrioxamB[c] + 2 h[c] + ribflv[c]				Inorganic Ion Transport and Metabolism	0	0	1000	0	1		Iron uptake using desferrioxamine B system
FEOXAMBUt	desferrioxamine B secretion	desferrioxamB[c] + h[e] -> h[c] + desferrioxamB[e]				Inorganic Ion Transport and Metabolism	0	0	1000	0	1		Iron uptake using desferrioxamine B system
FEOXAMEabc	ferrioxamine E transport via ABC system	atp[c] + h2o[c] + ferrioxamE[e] -> adp[c] + ferrioxamE[c] + h[c] + pi[c]	SCO2780	SCO2780	desE	Inorganic Ion Transport and Metabolism	0	0	1000	0	4			Patel P, Song L, Challis GL.#2010#Distinct extracytoplasmic siderophore binding proteins recognize ferrioxamines and ferricoelichelin in Streptomyces coelicolor A3(2).#Biochemistry.#49#8033-8042#
FEOXAMEexs	desferrioxamine E Fe-loading reaction (spontaneaous)	fe3[e] + desferrioxamE[e] -> ferrioxamE[e]	s0001	s0001	SPONTANEOUS	Inorganic Ion Transport and Metabolism	0	0	1000	0	1		Iron uptake using desferrioxamine E system, spontaneous reaction
FEOXAMER1	ferrioxamine E reductase	fadh2[c] + 2 ferrioxamE[c] -> fad[c] + 2 fe2[c] + 2 desferrioxamE[c] + 2 h[c]				Inorganic Ion Transport and Metabolism	0	0	1000	0	1		Iron uptake using desferrioxamine E system
FEOXAMER2	ferrioxamine E reductase	2 ferrioxamE[c] + fmnh2[c] -> 2 fe2[c] + 2 desferrioxamE[c] + fmn[c] + 2 h[c]				Inorganic Ion Transport and Metabolism	0	0	1000	0	1		Iron uptake using desferrioxamine E system
FEOXAMER3	ferrioxamine E reductase	2 ferrioxamE[c] + rbflvrd[c] -> 2 fe2[c] + 2 desferrioxamE[c] + 2 h[c] + ribflv[c]				Inorganic Ion Transport and Metabolism	0	0	1000	0	1		Iron uptake using desferrioxamine E system
FEOXAMEUt	desferrioxamine E secretion	desferrioxamE[c] + h[e] -> h[c] + desferrioxamE[e]				Inorganic Ion Transport and Metabolism	0	0	1000	0	1		Iron uptake using desferrioxamine E system
FERO	ferroxidase	4 fe2[c] + 4 h[c] + o2[c] -> 4 fe3[c] + 2 h2o[c]	((SCO3439 and SCO3440) and SCO6712)	SCO3439 SCO3440 SCO6712		Inorganic Ion Transport and Metabolism	0	0	1000	0	2	1.16.3.1
H2SO	Hydrogen sulfide oxidation	h2s[c] + 2 o2[c] -> 2 h[c] + so4[c]	s0001	s0001	SPONTANEOUS	Inorganic Ion Transport and Metabolism	0	0	1000	0	1		Spontaneous reaction
Kabc	Potassium ABC transporter	atp[c] + h2o[c] + k[e] -> adp[c] + h[c] + k[c] + pi[c]	(SCO3716 and SCO3717 and SCO3718)	SCO3716 SCO3717 SCO3718	kdpC kdpB kdpA	Inorganic Ion Transport and Metabolism	0	0	1000	0	2
Kt2	potassium transport in via proton symport	h[e] + k[e] -> h[c] + k[c]	SCO3826	SCO3826		Inorganic Ion Transport and Metabolism	0	0	1000	0	2
Kt3	potassium transport out via proton antiport	k[c] + h[e] -> h[c] + k[e]	SCO1962	SCO1962		Inorganic Ion Transport and Metabolism	0	0	1000	0	2
MG2t	magnesium (+2) transport in via diffusion	mg2[e] -> mg2[c]	(SCO1667 or SCO5157)	SCO1667 SCO5157		Inorganic Ion Transport and Metabolism	0	0	1000	0	2
MG2uabc	Magnesium (Mg+2) ABC transporter (uptake)	atp[c] + h2o[c] + mg2[e] -> adp[c] + h[c] + mg2[c] + pi[c]	SCO2499	SCO2499		Inorganic Ion Transport and Metabolism	0	0	1000	0	2
MN2t3	manganese (Mn+2) transport out via proton antiport	mn2[c] + h[e] -> h[c] + mn2[e]	(SCO0776 or SCO1310 or SCO2772 or SCO6751)	SCO0776 SCO1310 SCO2772 SCO6751		Inorganic Ion Transport and Metabolism	0	0	1000	0	2
MOBDabc	molybdate transport via ABC system	atp[c] + h2o[c] + mobd[e] -> adp[c] + h[c] + mobd[c] + pi[c]	(SCO3706 and SCO3705 and SCO3704)	SCO3706 SCO3705 SCO3704		Inorganic Ion Transport and Metabolism	0	0	1000	0	2
NAt3	sodium transport out via proton antiport	na1[c] + h[e] -> h[c] + na1[e]	SCO1962	SCO1962		Inorganic Ion Transport and Metabolism	0	0	1000	0	2
NAt3_2	sodium proton antiporter (H:NA is 2)	na1[c] + 2 h[e] -> 2 h[c] + na1[e]	(SCO0015 or SCO0285 or SCO3564 or SCO7832)	SCO0015 SCO0285 SCO3564 SCO7832	NhaA	Inorganic Ion Transport and Metabolism	0	0	1000	0	3			Park SH, Choi SS, Kim YJ, Chang YK, Sherman DH, Kim ES.#2009#Functional expression of SCO7832 stimulates tautomycetin production via pathway-specific regulatory gene overexpression in Streptomyces sp. CK4412.#J Ind Microbiol Biotechnol.#36#993-998#
NH4t	ammonia reversible transport	nh4[e] <=> nh4[c]	(SCO5583 or s0001)	SCO5583 s0001	amtB SPONTANEOUS	Inorganic Ion Transport and Metabolism	1	-1000	1000	0	2
NI2t	nickel (+2) transport in via permease (no H+)	ni2[e] -> ni2[c]	(SCO1667 or SCO5157)	SCO1667 SCO5157		Inorganic Ion Transport and Metabolism	0	0	1000	0	2
NI2t3	nickle (Ni+2) transport out via proton antiport	ni2[c] + h[e] -> h[c] + ni2[e]	(SCO0776 or SCO1310 or SCO2772 or SCO6751)	SCO0776 SCO1310 SCO2772 SCO6751		Inorganic Ion Transport and Metabolism	0	0	1000	0	2
NI2uabc	nickel transport via ABC system (uptake)	atp[c] + h2o[c] + ni2[e] -> adp[c] + h[c] + ni2[c] + pi[c]	((SCO6454 and SCO6452 and SCO6453 and SCO6451) or SCO2499)	SCO6454 SCO6452 SCO6453 SCO6451 SCO2499	nikD nikB nikC nikA	Inorganic Ion Transport and Metabolism	0	0	1000	0	2
NO2t2r	nitrite transport in via proton symport, reversible	h[e] + no2[e] <=> h[c] + no2[c]	(SCO2959 or SCO0213)	SCO2959 SCO0213	narK	Inorganic Ion Transport and Metabolism	1	-1000	1000	0	2
NO3t7	nitrate transport in via nitrite antiport	no2[c] + no3[e] -> no3[c] + no2[e]	(SCO2959 or SCO0213)	SCO2959 SCO0213	narK	Inorganic Ion Transport and Metabolism	0	0	1000	0	2
NOt	NO transport (diffusion)	no[e] <=> no[c]	s0001	s0001	SPONTANEOUS	Inorganic Ion Transport and Metabolism	1	-1000	1000	0	1		Spontaneous reaction
O2t	o2 transport via diffusion	o2[e] <=> o2[c]	s0001	s0001	SPONTANEOUS	Inorganic Ion Transport and Metabolism	1	-1000	1000	0	1		Spontaneous reaction
PIt2r	phosphate reversible transport via symport	h[e] + pi[e] <=> h[c] + pi[c]	(SCO4138 or SCO1845)	SCO4138 SCO1845	pitH1 pitH2	Inorganic Ion Transport and Metabolism	1	-1000	1000	0	2
Piuabc	phosphate transport via ABC system (uptake)	atp[c] + h2o[c] + pi[e] -> adp[c] + h[c] + 2 pi[c]	((SCO4139 and SCO4140 and SCO4141 and SCO4142) or SCO2428 or (SCO6814 and SCO6815 and SCO6816))	SCO4139 SCO4140 SCO4141 SCO4142 SCO2428 SCO6814 SCO6815 SCO6816	pstB pstA pstC pstS	Inorganic Ion Transport and Metabolism	0	0	1000	0	2
SO4t2	sulfate transport in via proton symport	h[e] + so4[e] -> h[c] + so4[c]	SCO3276	SCO3276		Inorganic Ion Transport and Metabolism	0	0	1000	0	2
SULabc	sulfate transport via ABC system	atp[c] + h2o[c] + so4[e] -> adp[c] + h[c] + pi[c] + so4[c]	(SCO3706 and SCO3705 and SCO3704)	SCO3706 SCO3705 SCO3704		Inorganic Ion Transport and Metabolism	0	0	1000	0	2
TUNGSabc	tungstate transport via ABC system	atp[c] + h2o[c] + tungs[e] -> adp[c] + h[c] + pi[c] + tungs[c]	(SCO3706 and SCO3705 and SCO3704)	SCO3706 SCO3705 SCO3704		Inorganic Ion Transport and Metabolism	0	0	1000	0	2
ZN2t3	zinc (Zn+2) transport out via proton antiport	zn2[c] + h[e] -> h[c] + zn2[e]	(SCO0776 or SCO1310 or SCO2772 or SCO6751)	SCO0776 SCO1310 SCO2772 SCO6751		Inorganic Ion Transport and Metabolism	0	0	1000	0	2
ZNabc	zinc (Zn+2) transport via ABC system	atp[c] + h2o[c] + zn2[e] -> adp[c] + h[c] + pi[c] + zn2[c]	((SCO0476 and SCO0475 and SCO0473) or (SCO2506 and SCO2507 and SCO2505))	SCO0476 SCO0475 SCO0473 SCO2506 SCO2507 SCO2505	( ZnuA and ZnuB and ZnuC )	Inorganic Ion Transport and Metabolism	0	0	1000	0	2
DDGK	5-dehydro-2-deoxygluconokinase	5ddglcn[c] + atp[c] -> 5ddg6p[c] + adp[c] + h[c]	SCO6978	SCO6978		Inositol Phosphate Metabolism	0	0	1000	0	2	2.7.1.92
DDPGA2	5-dehydro-2-deoxyphosphogluconate aldolase	5ddg6p[c] <=> dhap[c] + msa[c]				Inositol Phosphate Metabolism	1	-1000	1000	0	1	4.1.2.29	Required for growth using myo-inositol as a carbon source
DGI	5-Deoxy glucuronate isomerase	5doglcn[c] <=> 5ddglcn[c]	SCO6976	SCO6976		Inositol Phosphate Metabolism	1	-1000	1000	0	2
INS2D	inositol 2-dehydrogenase	inost[c] + nad[c] -> 2ins[c] + h[c] + nadh[c]	(SCO6255 or SCO6984 or SCO7254)	SCO6255 SCO6984 SCO7254		Inositol Phosphate Metabolism	0	0	1000	0	2	1.1.1.18
INSDH	inosose 2,3-dehydratase	2ins[c] <=> thchd[c] + h2o[c]	SCO6982	SCO6982		Inositol Phosphate Metabolism	1	-1000	1000	0	2	4.2.1.44
MI1PS	myo-Inositol-1-phosphate synthase	g6p[c] -> mi1p-D[c]	(SCO3243 or SCO3899 or SCO6573)	SCO3243 SCO3899 SCO6573		Inositol Phosphate Metabolism	0	0	1000	0	2	5.5.1.4
MI1PS2	myo-Inositol-1-phosphate synthase	g6p[c] -> mi1p-L[c]	(SCO3243 or SCO3899 or SCO6573)	SCO3243 SCO3899 SCO6573		Inositol Phosphate Metabolism	0	0	1000	0	2	5.5.1.4
THCHDH	3D-(3,5/4)-trihydroxycyclohexane-1,2-dione hydrolase	thchd[c] + h2o[c] <=> 5doglcn[c] + h[c]	SCO6975	SCO6975		Inositol Phosphate Metabolism	1	-1000	1000	0	2
2MBCOATA	2-Methyl-butanoyl-CoA-ACP transacylase	ACP[c] + 2mbcoa[c] <=> coa[c] + 2mbACP[c]	((SCO1271 or SCO2388 or SCO6564) and (SCO2389 or SCO0549 or SCO1267 or SCO1272))	SCO1271 SCO2388 SCO6564 SCO2389 SCO0549 SCO1267 SCO1272	fabH3 fabH fabH2 acpP	Membrane Lipid Metabolism	1	-1000	1000	0	3			Li Y, Florova G, Reynolds KA.#2005#Alteration of the fatty acid profile of Streptomyces coelicolor by replacement of the initiation enzyme 3-ketoacyl acyl carrier protein synthase III (FabH).#J Bacteriol.#187#3795-3799#
ACACT1r	acetyl-CoA C-acetyltransferase	2 accoa[c] <=> aacoa[c] + coa[c]	(SCO5399 or SCO6788 or SCO1324 or SCO4502 or SCO6027)	SCO5399 SCO6788 SCO1324 SCO4502 SCO6027		Membrane Lipid Metabolism	1	-1000	1000	0	2	2.3.1.9
ACACT2r	acetyl-CoA C-acyltransferase (butanoyl-CoA) (r)	accoa[c] + btcoa[c] <=> 3ohcoa[c] + coa[c]	(SCO6788 or SCO1324 or SCO4502 or SCO6027)	SCO6788 SCO1324 SCO4502 SCO6027		Membrane Lipid Metabolism	1	-1000	1000	0	2	2.3.1.16
ACACT3r	acetyl-CoA C-acyltransferase (hexanoyl-CoA) (r)	accoa[c] + hxcoa[c] <=> 3oocoa[c] + coa[c]	(SCO6788 or SCO1324 or SCO4502 or SCO6027)	SCO6788 SCO1324 SCO4502 SCO6027		Membrane Lipid Metabolism	1	-1000	1000	0	2	2.3.1.16
ACACT4r	acetyl-CoA C-acyltransferase (octanoyl-CoA) (r)	accoa[c] + occoa[c] <=> 3odcoa[c] + coa[c]	(SCO6788 or SCO1324 or SCO4502 or SCO6027)	SCO6788 SCO1324 SCO4502 SCO6027		Membrane Lipid Metabolism	1	-1000	1000	0	2	2.3.1.16
ACACT5r	acetyl-CoA C-acyltransferase (decanoyl-CoA) (r)	accoa[c] + dcacoa[c] <=> 3oddcoa[c] + coa[c]	(SCO6788 or SCO1324 or SCO4502 or SCO6027)	SCO6788 SCO1324 SCO4502 SCO6027		Membrane Lipid Metabolism	1	-1000	1000	0	2	2.3.1.16
ACACT6r	acetyl-CoA C-acyltransferase (dodecanoyl-CoA) (r)	accoa[c] + ddcacoa[c] <=> 3otdcoa[c] + coa[c]	(SCO6788 or SCO1324 or SCO4502 or SCO6027)	SCO6788 SCO1324 SCO4502 SCO6027		Membrane Lipid Metabolism	1	-1000	1000	0	2	2.3.1.16
ACACT7r	acetyl-CoA C-acyltransferase (tetradecanoyl-CoA) (r)	accoa[c] + tdcoa[c] <=> 3ohdcoa[c] + coa[c]	(SCO6788 or SCO1324 or SCO4502 or SCO6027)	SCO6788 SCO1324 SCO4502 SCO6027		Membrane Lipid Metabolism	1	-1000	1000	0	2	2.3.1.16
ACACT8r	acetyl-CoA acyltransferase (hexadecanoyl-CoA) (r)	3oodcoa[c] + coa[c] <=> accoa[c] + pmtcoa[c]	(SCO6788 or SCO1324 or SCO4502 or SCO6027)	SCO6788 SCO1324 SCO4502 SCO6027		Membrane Lipid Metabolism	1	-1000	1000	0	2	2.3.1.16
ACCOAC	acetyl-CoA carboxylase	accoa[c] + atp[c] + hco3[c] -> adp[c] + h[c] + malcoa[c] + pi[c]	((SCO2445 or (SCO5535 and SCO5536)) and (SCO2777 or SCO4921 or SCO6271))	SCO2445 SCO5535 SCO5536 SCO2777 SCO4921 SCO6271	accB accE accC accA2 accA1	Membrane Lipid Metabolism	0	0	1000	0	4	6.4.1.2		Rodríguez E, Banchio C, Diacovich L, Bibb MJ, Gramajo H.#2001#Role of an essential acyl coenzyme A carboxylase in the primary and secondary metabolism of Streptomyces coelicolor A3(2).#Appl Environ Microbiol.#67#4166-4176#
ACOAD1f	acyl-CoA dehydrogenase (butanoyl-CoA)	btcoa[c] + fad[c] <=> b2coa[c] + fadh2[c]	(SCO1690 or SCO2774 or SCO6787 or SCO2779)	SCO1690 SCO2774 SCO6787 SCO2779	acdH2 acdH3 acdH	Membrane Lipid Metabolism	1	-1000	1000	0	2	1.3.99.2
ACOAD2f	acyl-CoA dehydrogenase (hexanoyl-CoA)	fad[c] + hxcoa[c] <=> fadh2[c] + hx2coa[c]	(SCO1690 or SCO2774 or SCO6787 or SCO2779)	SCO1690 SCO2774 SCO6787 SCO2779	acdH2 acdH3 acdH	Membrane Lipid Metabolism	1	-1000	1000	0	2	1.3.99.3
ACOAD3f	acyl-CoA dehydrogenase (octanoyl-CoA)	fad[c] + occoa[c] <=> fadh2[c] + oc2coa[c]	(SCO1690 or SCO2774 or SCO6787)	SCO1690 SCO2774 SCO6787	acdH2 acdH3	Membrane Lipid Metabolism	1	-1000	1000	0	2	1.3.99.3
ACOAD4f	acyl-CoA dehydrogenase (decanoyl-CoA)	dcacoa[c] + fad[c] <=> dc2coa[c] + fadh2[c]	(SCO1690 or SCO2774 or SCO6787)	SCO1690 SCO2774 SCO6787	acdH2 acdH3	Membrane Lipid Metabolism	1	-1000	1000	0	2	1.3.99.3
ACOAD5f	acyl-CoA dehydrogenase (dodecanoyl-CoA)	ddcacoa[c] + fad[c] <=> dd2coa[c] + fadh2[c]	(SCO1690 or SCO2774 or SCO6787)	SCO1690 SCO2774 SCO6787	acdH2 acdH3	Membrane Lipid Metabolism	1	-1000	1000	0	2	1.3.99.3
ACOAD6f	acyl-CoA dehydrogenase (tetradecanoyl-CoA)	fad[c] + tdcoa[c] <=> fadh2[c] + td2coa[c]	(SCO1690 or SCO2774 or SCO6787)	SCO1690 SCO2774 SCO6787	acdH2 acdH3	Membrane Lipid Metabolism	1	-1000	1000	0	2	1.3.99.3
ACOAD7f	acyl-CoA dehydrogenase (hexadecanoyl-CoA)	fad[c] + pmtcoa[c] <=> fadh2[c] + hdd2coa[c]	(SCO1690 or SCO2774 or SCO6787)	SCO1690 SCO2774 SCO6787	acdH2 acdH3	Membrane Lipid Metabolism	1	-1000	1000	0	2	1.3.99.3
ACOAD8f	acyl-CoA dehydrogenase (octadecanoyl-CoA)	fad[c] + stcoa[c] <=> fadh2[c] + od2coa[c]	(SCO1690 or SCO2774 or SCO6787)	SCO1690 SCO2774 SCO6787	acdH2 acdH3	Membrane Lipid Metabolism	1	-1000	1000	0	2	1.3.99.3
ACOATA	Acetyl-CoA ACP transacylase	ACP[c] + accoa[c] <=> acACP[c] + coa[c]	((SCO1271 or SCO2388 or SCO6564) and (SCO2389 or SCO0549 or SCO1267 or SCO1272))	SCO1271 SCO2388 SCO6564 SCO2389 SCO0549 SCO1267 SCO1272	fabH3 fabH fabH2 acpP	Membrane Lipid Metabolism	1	-1000	1000	0	4	2.3.1.38		Singh R, Mo S, Florova G, Reynolds KA.#2012#Streptomyces coelicolor RedP and FabH enzymes, initiating undecylprodiginine and fatty acid biosynthesis, exhibit distinct acyl-CoA and malonyl-acyl carrier protein substrate specificities.#FEMS Microbiol Lett.#328#32-38#
BCOATA	Butyryl-CoA-ACP transacylase	ACP[c] + btcoa[c] <=> coa[c] + butACP[c]	((SCO1271 or SCO2388 or SCO6564) and (SCO2389 or SCO0549 or SCO1267 or SCO1272))	SCO1271 SCO2388 SCO6564 SCO2389 SCO0549 SCO1267 SCO1272	fabH3 fabH fabH2 acpP	Membrane Lipid Metabolism	1	-1000	1000	0	3			Li Y, Florova G, Reynolds KA.#2005#Alteration of the fatty acid profile of Streptomyces coelicolor by replacement of the initiation enzyme 3-ketoacyl acyl carrier protein synthase III (FabH).#J Bacteriol.#187#3795-3799#
CTECOAI6	3-cis-2-trans-enoyl-CoA isomerase	tdecoa[c] <=> td2coa[c]	SCO6732	SCO6732		Membrane Lipid Metabolism	1	-1000	1000	0	2	5.3.3.8
CTECOAI7	3-cis-2-trans-enoyl-CoA isomerase	hdcoa[c] <=> hdd2coa[c]	SCO6732	SCO6732		Membrane Lipid Metabolism	1	-1000	1000	0	2	5.3.3.8
CTECOAI8	3-cis-2-trans-enoyl-CoA isomerase	odecoa[c] <=> od2coa[c]	SCO6732	SCO6732		Membrane Lipid Metabolism	1	-1000	1000	0	2	5.3.3.8
ECOAH2	3-hydroxyacyl-CoA dehydratase (3-hydroxyhexanoyl-CoA)	3hhcoa[c] <=> h2o[c] + hx2coa[c]	(SCO6732 or SCO4384)	SCO6732 SCO4384		Membrane Lipid Metabolism	1	-1000	1000	0	2	4.2.1.17
ECOAH3	3-hydroxyacyl-CoA dehydratase (3-hydroxyoctanoyl-CoA)	3hocoa[c] <=> h2o[c] + oc2coa[c]	(SCO6732 or SCO4384)	SCO6732 SCO4384		Membrane Lipid Metabolism	1	-1000	1000	0	2	4.2.1.17
ECOAH4	3-hydroxyacyl-CoA dehydratase (3-hydroxydecanoyl-CoA)	3hdcoa[c] <=> dc2coa[c] + h2o[c]	(SCO6732 or SCO4384)	SCO6732 SCO4384		Membrane Lipid Metabolism	1	-1000	1000	0	2	4.2.1.17
ECOAH5	3-hydroxyacyl-CoA dehydratase (3-hydroxydodecanoyl-CoA)	3hddcoa[c] <=> dd2coa[c] + h2o[c]	(SCO6732 or SCO4384)	SCO6732 SCO4384		Membrane Lipid Metabolism	1	-1000	1000	0	2	4.2.1.17
ECOAH6	3-hydroxyacyl-CoA dehydratase (3-hydroxytetradecanoyl-CoA)	3htdcoa[c] <=> h2o[c] + td2coa[c]	(SCO6732 or SCO4384)	SCO6732 SCO4384		Membrane Lipid Metabolism	1	-1000	1000	0	2	4.2.1.17
ECOAH7	3-hydroxyacyl-CoA dehydratase (3-hydroxyhexadecanoyl-CoA)	3hhdcoa[c] <=> h2o[c] + hdd2coa[c]	(SCO6732 or SCO4384)	SCO6732 SCO4384		Membrane Lipid Metabolism	1	-1000	1000	0	2	4.2.1.17
ECOAH8	3-hydroxyacyl-CoA dehydratase (3-hydroxyoctadecanoyl-CoA)	3hodcoa[c] <=> h2o[c] + od2coa[c]	(SCO6732 or SCO4384)	SCO6732 SCO4384		Membrane Lipid Metabolism	1	-1000	1000	0	2	4.2.1.17
HACD1	3-hydroxyacyl-CoA dehydrogenase (acetoacetyl-CoA)	aacoa[c] + h[c] + nadh[c] <=> 3hbcoa[c] + nad[c]	SCO6732	SCO6732		Membrane Lipid Metabolism	1	-1000	1000	0	2	1.1.1.35
HACD2	3-hydroxyacyl-CoA dehydrogenase (3-oxohexanoyl-CoA)	3ohcoa[c] + h[c] + nadh[c] <=> 3hhcoa[c] + nad[c]	SCO6732	SCO6732		Membrane Lipid Metabolism	1	-1000	1000	0	2	1.1.1.35
HACD3	3-hydroxyacyl-CoA dehydrogenase (3-oxooctanoyl-CoA)	3oocoa[c] + h[c] + nadh[c] <=> 3hocoa[c] + nad[c]	SCO6732	SCO6732		Membrane Lipid Metabolism	1	-1000	1000	0	2	1.1.1.35
HACD4	3-hydroxyacyl-CoA dehydrogenase (3-oxodecanoyl-CoA)	3odcoa[c] + h[c] + nadh[c] <=> 3hdcoa[c] + nad[c]	SCO6732	SCO6732		Membrane Lipid Metabolism	1	-1000	1000	0	2	1.1.1.35
HACD5	3-hydroxyacyl-CoA dehydrogenase (3-oxododecanoyl-CoA)	3oddcoa[c] + h[c] + nadh[c] <=> 3hddcoa[c] + nad[c]	SCO6732	SCO6732		Membrane Lipid Metabolism	1	-1000	1000	0	2	1.1.1.35
HACD6	3-hydroxyacyl-CoA dehydrogenase (3-oxotetradecanoyl-CoA)	3otdcoa[c] + h[c] + nadh[c] <=> 3htdcoa[c] + nad[c]	SCO6732	SCO6732		Membrane Lipid Metabolism	1	-1000	1000	0	2	1.1.1.35
HACD7	3-hydroxyacyl-CoA dehydrogenase (3-oxohexadecanoyl-CoA)	3ohdcoa[c] + h[c] + nadh[c] <=> 3hhdcoa[c] + nad[c]	SCO6732	SCO6732		Membrane Lipid Metabolism	1	-1000	1000	0	2	1.1.1.35
HACD8	3-hydroxyacyl-CoA dehydrogenase (3-oxooctadecanoyl-CoA)	3oodcoa[c] + h[c] + nadh[c] <=> 3hodcoa[c] + nad[c]	SCO6732	SCO6732		Membrane Lipid Metabolism	1	-1000	1000	0	2	1.1.1.35
IBCOATA	Isobutiryl-CoA-ACP transacylase	ACP[c] + ibcoa[c] <=> coa[c] + ibACP[c]	((SCO1271 or SCO2388 or SCO6564) and (SCO2389 or SCO0549 or SCO1267 or SCO1272))	SCO1271 SCO2388 SCO6564 SCO2389 SCO0549 SCO1267 SCO1272	fabH3 fabH fabH2 acpP	Membrane Lipid Metabolism	1	-1000	1000	0	4			Singh R, Mo S, Florova G, Reynolds KA.#2012#Streptomyces coelicolor RedP and FabH enzymes, initiating undecylprodiginine and fatty acid biosynthesis, exhibit distinct acyl-CoA and malonyl-acyl carrier protein substrate specificities.#FEMS Microbiol Lett.#328#32-38#
IVCOATA	Isovaleryl-CoA-ACP transacylase	ACP[c] + ivcoa[c] <=> coa[c] + ivACP[c]	((SCO1271 or SCO2388 or SCO6564) and (SCO2389 or SCO0549 or SCO1267 or SCO1272))	SCO1271 SCO2388 SCO6564 SCO2389 SCO0549 SCO1267 SCO1272	fabH3 fabH fabH2 acpP	Membrane Lipid Metabolism	1	-1000	1000	0	3			Li Y, Florova G, Reynolds KA.#2005#Alteration of the fatty acid profile of Streptomyces coelicolor by replacement of the initiation enzyme 3-ketoacyl acyl carrier protein synthase III (FabH).#J Bacteriol.#187#3795-3799#
KAS14	beta-ketoacyl-ACP synthase	acACP[c] + h[c] + malACP[c] -> ACP[c] + actACP[c] + co2[c]	(SCO0548 or (SCO2390 or SCO1266))	SCO0548 SCO2390 SCO1266	fabB2 fabF fabF2	Membrane Lipid Metabolism	0	0	1000	0	2	2.3.1.41
KAS15	beta-ketoacyl-ACP synthase (2)	accoa[c] + h[c] + malACP[c] -> actACP[c] + co2[c] + coa[c]	((SCO1271 or SCO2388 or SCO6564) and (SCO2389 or SCO0549 or SCO1267 or SCO1272))	SCO1271 SCO2388 SCO6564 SCO2389 SCO0549 SCO1267 SCO1272	fabH3 fabH fabH2 acpP	Membrane Lipid Metabolism	0	0	1000	0	4			Singh R, Mo S, Florova G, Reynolds KA.#2012#Streptomyces coelicolor RedP and FabH enzymes, initiating undecylprodiginine and fatty acid biosynthesis, exhibit distinct acyl-CoA and malonyl-acyl carrier protein substrate specificities.#FEMS Microbiol Lett.#328#32-38#
MACPD	Malonyl-ACP decarboxylase	h[c] + malACP[c] -> acACP[c] + co2[c]	SCO0548	SCO0548	fabB2	Membrane Lipid Metabolism	0	0	1000	0	2
MCOATA	Malonyl-CoA-ACP transacylase	ACP[c] + malcoa[c] <=> coa[c] + malACP[c]	(SCO2387 and (SCO2389 or SCO0549 or SCO1267 or SCO1272))	SCO2387 SCO2389 SCO0549 SCO1267 SCO1272	fabD acpP	Membrane Lipid Metabolism	1	-1000	1000	0	4	2.3.1.39		Keatinge-Clay AT, Shelat AA, Savage DF, Tsai SC, Miercke LJ, O'Connell JD 3rd, Khosla C, Stroud RM.#2003#Catalysis, specificity, and ACP docking site of Streptomyces coelicolor malonyl-CoA:ACP transacylase.#Structure.#11#147-154##Revill WP, Bibb MJ, Hopwood DA.#1996#Relationships between fatty acid and polyketide synthases from Streptomyces coelicolor A3(2): characterization of the fatty acid syn…
PCOATA	Propionyl-CoA-ACP transacylase	ACP[c] + ppcoa[c] <=> coa[c] + ppACP[c]	((SCO1271 or SCO2388 or SCO6564) and (SCO2389 or SCO0549 or SCO1267 or SCO1272))	SCO1271 SCO2388 SCO6564 SCO2389 SCO0549 SCO1267 SCO1272	fabH3 fabH fabH2 acpP	Membrane Lipid Metabolism	1	-1000	1000	0	3			Li Y, Florova G, Reynolds KA.#2005#Alteration of the fatty acid profile of Streptomyces coelicolor by replacement of the initiation enzyme 3-ketoacyl acyl carrier protein synthase III (FabH).#J Bacteriol.#187#3795-3799#
AHC	adenosylhomocysteinase	ahcys[c] + h2o[c] <=> adn[c] + hcys-L[c]	SCO3023	SCO3023	sahH	Methionine Metabolism	1	-1000	1000	0	2	3.3.1.1
AHSERL2r	O-acetylhomoserine (thiol)-lyase	achms[c] + h2s[c] <=> ac[c] + h[c] + hcys-L[c]	(SCO1294 or SCO4958)	SCO1294 SCO4958	metB	Methionine Metabolism	1	-1000	1000	0	2	4.2.99.9
CYSTL	cystathionine b-lyase	cyst-L[c] + h2o[c] -> hcys-L[c] + nh4[c] + pyr[c]	(SCO0435 or SCO0731)	SCO0435 SCO0731	malY	Methionine Metabolism	0	0	1000	0	2	4.4.1.8
HCYSMT	homocysteine S-methyltransferase	amet[c] + hcys-L[c] -> ahcys[c] + h[c] + met-L[c]	SCO6137	SCO6137	mmuM	Methionine Metabolism	0	0	1000	0	2	2.1.1.10
HSST	homoserine O-succinyltransferase	hom-L[c] + succoa[c] -> coa[c] + suchms[c]				Methionine Metabolism	0	0	1000	0	1	2.3.1.46	Required for growth (L-methionine biosynthesis)
METAT	methionine adenosyltransferase	atp[c] + h2o[c] + met-L[c] -> amet[c] + pi[c] + ppi[c]	SCO1476	SCO1476	metK	Methionine Metabolism	0	0	1000	0	3	2.5.1.6		Okamoto S, Lezhava A, Hosaka T, Okamoto-Hosoya Y, Ochi K.#2003#Enhanced expression of S-adenosylmethionine synthetase causes overproduction of actinorhodin in Streptomyces coelicolor A3(2).#J Bacteriol.#185#601-609#
METB1r	cystathionine gamma-synthase	achms[c] + cys-L[c] <=> ac[c] + cyst-L[c] + h[c]	(SCO1294 or SCO4958)	SCO1294 SCO4958	metB	Methionine Metabolism	1	-1000	1000	0	2	4.2.99.9
METOX1s	methionine oxidation (spontaneous)	h2o2[c] + met-L[c] -> h2o[c] + metsox-S-L[c]	s0001	s0001	SPONTANEOUS	Methionine Metabolism	0	0	1000	0	1		Spontaneous reaction
METOX2s	methionine oxidation 2 (spontaneous)	h2o2[c] + met-L[c] -> h2o[c] + metsox-R-L[c]	s0001	s0001	SPONTANEOUS	Methionine Metabolism	0	0	1000	0	1		Spontaneous reaction
METS	methionine synthase	5mthf[c] + hcys-L[c] -> h[c] + met-L[c] + thf[c]	SCO1657	SCO1657	metH	Methionine Metabolism	0	0	1000	0	2	2.1.1.13
METSOXR1	L-methionine-S-oxide reductase	metsox-S-L[c] + trdrd[c] -> h2o[c] + met-L[c] + trdox[c]	(SCO4956 and (SCO0885 or SCO3889 or SCO5419 or SCO5438))	SCO4956 SCO0885 SCO3889 SCO5419 SCO5438	trxA3 trxA trxA4 trxA2	Methionine Metabolism	0	0	1000	0	2	1.8.4.5
METSOXR2	L-methionine-R-sulfoxide reductase	metsox-R-L[c] + trdrd[c] -> h2o[c] + met-L[c] + trdox[c]	(SCO6061 and (SCO0885 or SCO3889 or SCO5419 or SCO5438))	SCO6061 SCO0885 SCO3889 SCO5419 SCO5438	trxA3 trxA trxA4 trxA2	Methionine Metabolism	0	0	1000	0	2
MHPGLUT	5-methyltetrahydropteroyltriglutamate-homocysteine S-methyltransferase	hcys-L[c] + mhpglu[c] -> hpglu[c] + met-L[c]	SCO0985	SCO0985	metE	Methionine Metabolism	0	0	1000	0	2	2.1.1.14
MTAP	5'-methylthioadenosine phosphorylase	5mta[c] + pi[c] -> 5mdr1p[c] + ade[c]	SCO3188	SCO3188		Methionine Metabolism	0	0	1000	0	2	2.4.2.28
MTRI	5-methylthioribose-1-phosphate isomerase	5mdr1p[c] <=> 5mdru1p[c]	SCO3014	SCO3014		Methionine Metabolism	1	-1000	1000	0	2	5.3.1.23
SHSL1	O-succinylhomoserine lyase (L-cysteine)	cys-L[c] + suchms[c] -> cyst-L[c] + h[c] + succ[c]	(SCO1294 or SCO4958)	SCO1294 SCO4958	metB	Methionine Metabolism	0	0	1000	0	2	4.2.99.9
SHSL2	O-succinylhomoserine lyase (H2S)	h2s[c] + suchms[c] -> hcys-L[c] + h[c] + succ[c]	(SCO1294 or SCO4958)	SCO1294 SCO4958	metB	Methionine Metabolism	0	0	1000	0	2	4.2.99.9
SHSL4	O-succinylhomoserine lyase (elimination)	h2o[c] + suchms[c] -> 2obut[c] + h[c] + succ[c] + nh4[c]	(SCO1294 or SCO4958)	SCO1294 SCO4958	metB	Methionine Metabolism	0	0	1000	0	2	4.2.99.9
SPMS	spermidine synthase	ametam[c] + ptrc[c] -> 5mta[c] + h[c] + spmd[c]	(SCO3655 or SCO2455)	SCO3655 SCO2455		Methionine Metabolism	0	0	1000	0	2	2.5.1.16
SPRMS	spermine synthase	ametam[c] + spmd[c] -> 5mta[c] + h[c] + sprm[c]	(SCO3655 or SCO2455)	SCO3655 SCO2455		Methionine Metabolism	0	0	1000	0	2	2.5.1.22
MCTP1A	murein crosslinking transpeptidase 1A:(A2pm->D-ala)	murein5p5p[c] -> ala-D[c] + murein5px4p[c]	(SCO3847 or SCO5301 or SCO2608 or SCO2090)	SCO3847 SCO5301 SCO2608 SCO2090	pbp2 ftsI	Murein Biosynthesis	0	0	1000	0	2			Bennett JA, Yarnall J, Cadwallader AB, Kuennen R, Bidey P, Stadelmaier B, McCormick JR.#2009#Medium-dependent phenotypes of Streptomyces coelicolor with mutations in ftsI or ftsW.#J Bacteriol.#191#661-664#
MCTP1B	murein crosslinking transpeptidase 1B:(A2pm->A2pm)	murein5p5p[c] -> alaala[c] + murein5px3p[c]	(SCO3847 or SCO5301)	SCO3847 SCO5301		Murein Biosynthesis	0	0	1000	0	2
MCTP2A	murein crosslinking transpeptidase 1A:(A2pm->D-ala)	murein5p5p5p[c] -> 2 ala-D[c] + murein5px4px4p[c]	(SCO3847 or SCO5301 or SCO2608 or SCO2090)	SCO3847 SCO5301 SCO2608 SCO2090	pbp2 ftsI	Murein Biosynthesis	0	0	1000	0	2			Bennett JA, Yarnall J, Cadwallader AB, Kuennen R, Bidey P, Stadelmaier B, McCormick JR.#2009#Medium-dependent phenotypes of Streptomyces coelicolor with mutations in ftsI or ftsW.#J Bacteriol.#191#661-664#
MDDCP1	murein D,D-carboxypeptidase (murein5px4p)	h2o[c] + murein5px4p[c] -> ala-D[c] + murein4px4p[c]	(SCO3408 or SCO3811 or SCO4847 or SCO6131)	SCO3408 SCO3811 SCO4847 SCO6131	dacA	Murein Biosynthesis	0	0	1000	0	2	3.4.16.4
MDDCP2	murein D,D-carboxypeptidase (murein5px4px4p)	h2o[c] + murein5px4px4p[c] -> ala-D[c] + murein4px4px4p[c]	(SCO3408 or SCO3811 or SCO4847 or SCO6131)	SCO3408 SCO3811 SCO4847 SCO6131	dacA	Murein Biosynthesis	0	0	1000	0	2	3.4.16.4
MDDCP3	murein D,D-carboxypeptidase (murein5p5p)	h2o[c] + murein5p5p[c] -> ala-D[c] + murein5p4p[c]	(SCO3408 or SCO3811 or SCO4847 or SCO6131)	SCO3408 SCO3811 SCO4847 SCO6131	dacA	Murein Biosynthesis	0	0	1000	0	2	3.4.16.4
MDDCP4	murein D,D-carboxypeptidase (murein5p4p)	h2o[c] + murein5p4p[c] -> ala-D[c] + murein4p4p[c]	(SCO3408 or SCO3811 or SCO4847 or SCO6131)	SCO3408 SCO3811 SCO4847 SCO6131	dacA	Murein Biosynthesis	0	0	1000	0	2	3.4.16.4
MDDCP5	murein D,D-carboxypeptidase (murein5p3p)	h2o[c] + murein5p3p[c] -> ala-D[c] + murein4p3p[c]	(SCO3408 or SCO3811 or SCO4847 or SCO6131)	SCO3408 SCO3811 SCO4847 SCO6131	dacA	Murein Biosynthesis	0	0	1000	0	2	3.4.16.4
MPTG	murein polymerizing transglycosylase	2 uaagmda[c] -> 2 h[c] + 2 udcpdp[c] + murein5p5p[c]	((SCO3847 or SCO5301) and (SCO2709 or SCO3894))	SCO3847 SCO5301 SCO2709 SCO3894	murJ	Murein Biosynthesis	0	0	1000	0	2
MPTG2	murein polymerizing transglycosylase 2 (three linked units)	uaagmda[c] + murein5p5p[c] -> h[c] + udcpdp[c] + murein5p5p5p[c]	((SCO3847 or SCO5301) and (SCO2709 or SCO3894))	SCO3847 SCO5301 SCO2709 SCO3894	murJ	Murein Biosynthesis	0	0	1000	0	2
4PCP	tetrapeptide L,D-carboxypeptidase	LalaDgluMdapDala[c] + h2o[c] -> LalaDgluMdap[c] + ala-D[c]	SCO6489	SCO6489		Murein Recycling	0	0	1000	0	2
ACGAMK	N-acetylglucosamine kinase	acgam[c] + atp[c] -> acgam6p[c] + adp[c] + h[c]	SCO4285	SCO4285	nagK	Murein Recycling	0	0	1000	0	3	2.7.1.59		Świątek MA, Tenconi E, Rigali S, van Wezel GP.#2012#Functional analysis of the N-acetylglucosamine metabolic genes of Streptomyces coelicolor and role in control of development and antibiotic production.#J Bacteriol.#194#1136-1144#
AGM4PCP	N-Acetyl-D-glucosamine(anhydrous)N-Acetylmuramyl-tetrapeptide L,D-carboxypeptidase	anhgm4p[c] + h2o[c] -> ala-D[c] + anhgm3p[c]	SCO6489	SCO6489		Murein Recycling	0	0	1000	0	2
AM4PCP	anhydrous-N-Acetylmuramyl-tetrapeptide L,D-carboxypeptidase	anhm4p[c] + h2o[c] -> ala-D[c] + anhm3p[c]	SCO6489	SCO6489		Murein Recycling	0	0	1000	0	2
ANHMK	1,6-anhydrous-N-Acetylmuramate kinase	anhm[c] + atp[c] + h2o[c] -> acmum6p[c] + adp[c] + h[c]	SCO7595	SCO7595		Murein Recycling	0	0	1000	0	2
LADGMDH	L-alanyl-gamma-D-glutamyl-meso-diaminopimelate hydrolase	LalaDgluMdap[c] + h2o[c] -> 26dap-M[c] + LalaDglu[c]	SCO1948	SCO1948		Murein Recycling	0	0	1000	0	2
MDDEP1	murein D,D-endopeptidase (murein4px4p)	h2o[c] + murein4px4p[c] -> murein4p4p[c]	(SCO6131 or SCO4439)	SCO6131 SCO4439		Murein Recycling	0	0	1000	0	2
MDDEP2	murein D,D-endopeptidase (murein3px4p)	h2o[c] + murein3px4p[c] -> murein4p3p[c]	(SCO6131 or SCO4439)	SCO6131 SCO4439		Murein Recycling	0	0	1000	0	2
MDDEP3	murein D,D-endopeptidase (murein5px4p)	h2o[c] + murein5px4p[c] -> murein5p4p[c]	(SCO6131 or SCO4439)	SCO6131 SCO4439		Murein Recycling	0	0	1000	0	2
MDDEP4	murein D,D-endopeptidase (murein4px4px4p)	h2o[c] + murein4px4px4p[c] -> murein4px4p4p[c]	(SCO6131 or SCO4439)	SCO6131 SCO4439		Murein Recycling	0	0	1000	0	2
UM4PCP	UDP-N-acetylmuramoyl-L-alanyl-D-gamma-glutamyl-meso-2,6-diaminopimelate-D-alanine L,D-carboxypeptidase	h2o[c] + um4p[c] -> ala-D[c] + ugmd[c]	SCO6489	SCO6489		Murein Recycling	0	0	1000	0	2
ALLTAH	allantoicase	alltt[c] + h2o[c] -> urdglyc[c] + urea[c]	SCO6248	SCO6248		Nitrogen Metabolism	0	0	1000	0	2	3.5.3.4
ALLTN	allantoinase	alltn[c] + h2o[c] -> alltt[c] + h[c]	SCO6247	SCO6247		Nitrogen Metabolism	0	0	1000	0	2	3.5.2.5
NO3R2	Nitrate reductase (menaquinol-9)	2 h[c] + no3[c] + mql9[c] -> h2o[c] + no2[c] + mqn9[c] + 2 h[e]	((SCO0216 and SCO0217 and SCO0218 and SCO0219) or (SCO4947 and SCO4948 and SCO4949 and SCO4950) or (SCO6532 and SCO6533 and SCO6534 and SCO6535) or SCO2473)	SCO0216 SCO0217 SCO0218 SCO0219 SCO4947 SCO4948 SCO4949 SCO4950 SCO6532 SCO6533 SCO6534 SCO6535 SCO2473	nar	Nitrogen Metabolism	0	0	1000	0	3	1.7.99.4		Wang J, Zhao GP.#2009#GlnR positively regulates nasA transcription in Streptomyces coelicolor.#Biochem Biophys Res Commun.#386#77-81##Fischer M, Alderson J, van Keulen G, White J, Sawers RG.#2010#The obligate aerobe Streptomyces coelicolor A3(2) synthesizes three active respiratory nitrate reductases.#Microbiology.#156#3166-3179#
NODOx	nitric oxide dioxygenase	nadh[c] + 2 no[c] + 2 o2[c] -> h[c] + nad[c] + 2 no3[c]	(SCO7428 or SCO7094)	SCO7428 SCO7094	hmpA1 hmpA2	Nitrogen Metabolism	0	0	1000	0	2	1.14.12.17
NODOy	nitric oxide dioxygenase	nadph[c] + 2 no[c] + 2 o2[c] -> h[c] + nadp[c] + 2 no3[c]	(SCO7428 or SCO7094)	SCO7428 SCO7094	hmpA1 hmpA2	Nitrogen Metabolism	0	0	1000	0	2	1.14.12.17
UGLYCH	Ureidoglycolate hydrolase	2 h[c] + h2o[c] + urdglyc[c] -> co2[c] + glx[c] + 2 nh4[c]				Nitrogen Metabolism	0	0	1000	0	1	3.5.3.19	Required for growth using glycine as a carbon source
23PDE2e	2',3'-cyclic-nucleotide phosphodiesterase (UMP)	23cump[e] + h2o[e] -> 3ump[e] + h[e]	SCO2015	SCO2015		Nucleotide Salvage Pathway	0	0	1000	0	2	3.1.4.16
23PDE4e	2',3'-cyclic-nucleotide phosphodiesterase (CMP)	23ccmp[e] + h2o[e] -> 3cmp[e] + h[e]	SCO2015	SCO2015		Nucleotide Salvage Pathway	0	0	1000	0	2	3.1.4.16
23PDE7e	2',3'-cyclic-nucleotide phosphodiesterase (AMP)	23camp[e] + h2o[e] -> 3amp[e] + h[e]	SCO2015	SCO2015		Nucleotide Salvage Pathway	0	0	1000	0	2	3.1.4.16
23PDE9e	2',3'-cyclic-nucleotide phosphodiesterase (GMP)	23cgmp[e] + h2o[e] -> 3gmp[e] + h[e]	SCO2015	SCO2015		Nucleotide Salvage Pathway	0	0	1000	0	2	3.1.4.16
3NTD2e	3'-nucleotidase (UMP)	3ump[e] + h2o[e] -> pi[e] + uri[e]	SCO2015	SCO2015		Nucleotide Salvage Pathway	0	0	1000	0	2
3NTD4e	3'-nucleotidase (CMP)	3cmp[e] + h2o[e] -> cytd[e] + pi[e]	SCO2015	SCO2015		Nucleotide Salvage Pathway	0	0	1000	0	2
3NTD7e	3'-nucleotidase (AMP)	3amp[e] + h2o[e] -> adn[e] + pi[e]	SCO2015	SCO2015		Nucleotide Salvage Pathway	0	0	1000	0	2
3NTD9e	3'-nucleotidase (GMP)	3gmp[e] + h2o[e] -> gsn[e] + pi[e]	SCO2015	SCO2015		Nucleotide Salvage Pathway	0	0	1000	0	2
ADA	Adenosine deaminase	adn[c] + h[c] + h2o[c] -> ins[c] + nh4[c]	(SCO2546 or SCO4644 or SCO4901 or SCO5662 or SCO7268)	SCO2546 SCO4644 SCO4901 SCO5662 SCO7268	add	Nucleotide Salvage Pathway	0	0	1000	0	4	3.5.4.4		Pornbanlualap S, Chalopagorn P.#2011#Adenosine deaminase from Streptomyces coelicolor: recombinant expression, purification and characterization.#Protein Expr Purif.#78#167-173#
ADK1	adenylate kinase	amp[c] + atp[c] <=> 2 adp[c]	SCO4723	SCO4723	adk	Nucleotide Salvage Pathway	1	-1000	1000	0	2	2.7.4.3
ADK2i	adenylate kinase (Inorganic triphosphate, irreversible)	amp[c] + pppi[c] -> adp[c] + ppi[c]	SCO4723	SCO4723	adk	Nucleotide Salvage Pathway	0	0	1000	0	2	2.7.4.3
ADK3i	adentylate kinase (GTP, irreversible)	amp[c] + gtp[c] -> adp[c] + gdp[c]	SCO4723	SCO4723	adk	Nucleotide Salvage Pathway	0	0	1000	0	2
ADK4i	adentylate kinase (ITP, irreversible)	amp[c] + itp[c] -> adp[c] + idp[c]	SCO4723	SCO4723	adk	Nucleotide Salvage Pathway	0	0	1000	0	2
ADNCYC	adenylate cyclase	atp[c] -> camp[c] + ppi[c]	SCO4928	SCO4928	cya	Nucleotide Salvage Pathway	0	0	1000	0	3	4.6.1.1		Süsstrunk U, Pidoux J, Taubert S, Ullmann A, Thompson CJ.#1998#Pleiotropic effects of cAMP on germination, antibiotic biosynthesis and morphological development in Streptomyces coelicolor.#Mol Microbiol.#30#33-46#
ADNK1	adenosine kinase	adn[c] + atp[c] -> adp[c] + amp[c] + h[c]	SCO2158	SCO2158		Nucleotide Salvage Pathway	0	0	1000	0	2	2.7.1.20
ADPRDP	ADPribose diphosphatase	adprib[c] + h2o[c] -> amp[c] + 2 h[c] + r5p[c]	SCO1775	SCO1775		Nucleotide Salvage Pathway	0	0	1000	0	2	3.6.1.13
ADPT	adenine phosphoribosyltransferase	ade[c] + prpp[c] -> amp[c] + ppi[c]	SCO1514	SCO1514	apt	Nucleotide Salvage Pathway	0	0	1000	0	2	2.4.2.7
ATPHs	ATP amine hydrolysis (spontaneous)	atp[c] + h[c] + h2o[c] -> itp[c] + nh4[c]	s0001	s0001	SPONTANEOUS	Nucleotide Salvage Pathway	0	0	1000	0	1		Spontaneous reaction
CSND	Cytosine deaminase	csn[c] + h[c] + h2o[c] -> nh4[c] + ura[c]	SCO4634	SCO4634		Nucleotide Salvage Pathway	0	0	1000	0	2	3.5.4.1
CYTD	cytidine deaminase	cytd[c] + h[c] + h2o[c] -> nh4[c] + uri[c]	(SCO4889 or SCO5680)	SCO4889 SCO5680		Nucleotide Salvage Pathway	0	0	1000	0	2	3.5.4.5
CYTK1	cytidylate kinase (CMP)	atp[c] + cmp[c] <=> adp[c] + cdp[c]	SCO1760	SCO1760	cmk	Nucleotide Salvage Pathway	1	-1000	1000	0	2	2.7.4.14
CYTK2	cytidylate kinase (dCMP)	atp[c] + dcmp[c] <=> adp[c] + dcdp[c]	SCO1760	SCO1760	cmk	Nucleotide Salvage Pathway	1	-1000	1000	0	2	2.7.4.14
DADA	Deoxyadenosine deaminase	dad-2[c] + h[c] + h2o[c] -> din[c] + nh4[c]	(SCO2546 or SCO4644 or SCO4901 or SCO5662 or SCO7268)	SCO2546 SCO4644 SCO4901 SCO5662 SCO7268	add	Nucleotide Salvage Pathway	0	0	1000	0	4	3.5.4.4		Pornbanlualap S, Chalopagorn P.#2011#Adenosine deaminase from Streptomyces coelicolor: recombinant expression, purification and characterization.#Protein Expr Purif.#78#167-173#
DADK	deoxyadenylate kinase	atp[c] + damp[c] <=> adp[c] + dadp[c]	SCO4723	SCO4723	adk	Nucleotide Salvage Pathway	1	-1000	1000	0	2	2.7.4.11
DATPHs	dATP amine hydrolysis (spontaneous)	datp[c] + h[c] + h2o[c] -> ditp[c] + nh4[c]	s0001	s0001	SPONTANEOUS	Nucleotide Salvage Pathway	0	0	1000	0	1		Spontaneous reaction
DCTPD	dCTP deaminase	dctp[c] + h[c] + h2o[c] -> dutp[c] + nh4[c]	SCO3678	SCO3678		Nucleotide Salvage Pathway	0	0	1000	0	2	3.5.4.13
DCTPD2	dCTP deaminase	ctp[c] + h[c] + h2o[c] -> utp[c] + nh4[c]	SCO3678	SCO3678		Nucleotide Salvage Pathway	0	0	1000	0	2	3.5.4.13
DCYTD	deoxycytidine deaminase	dcyt[c] + h[c] + h2o[c] -> duri[c] + nh4[c]	(SCO4889 or SCO5680)	SCO4889 SCO5680		Nucleotide Salvage Pathway	0	0	1000	0	2	3.5.4.14
DGK1	deoxyguanylate kinase (dGMP:ATP)	atp[c] + dgmp[c] <=> adp[c] + dgdp[c]	SCO1479	SCO1479		Nucleotide Salvage Pathway	1	-1000	1000	0	2	2.7.4.8
DTMPK	dTMP kinase	atp[c] + dtmp[c] <=> adp[c] + dtdp[c]				Nucleotide Salvage Pathway	1	-1000	1000	0	1	2.7.4.9	Required for growth (dTTP biosynthesis)
DURIK1	deoxyuridine kinase (ATP:Deoxyuridine)	atp[c] + duri[c] -> adp[c] + dump[c] + h[c]	SCO5845	SCO5845		Nucleotide Salvage Pathway	0	0	1000	0	2	2.7.1.21
DURIPP	deoxyuridine phosphorylase	duri[c] + pi[c] <=> 2dr1p[c] + ura[c]	SCO4890	SCO4890	deoA	Nucleotide Salvage Pathway	1	-1000	1000	0	2	2.4.2.4
DUTPDP	dUTP diphosphatase	dutp[c] + h2o[c] -> dump[c] + h[c] + ppi[c]	SCO5868	SCO5868	dut	Nucleotide Salvage Pathway	0	0	1000	0	2	3.6.1.23
GK1i	guanylate kinase (GMP:ATP, irreversible)	atp[c] + gmp[c] -> adp[c] + gdp[c]	SCO1479	SCO1479		Nucleotide Salvage Pathway	0	0	1000	0	2	2.7.4.8
GK2i	guanylate kinase (GMP:dATP, irreversible)	datp[c] + gmp[c] -> dadp[c] + gdp[c]	SCO1479	SCO1479		Nucleotide Salvage Pathway	0	0	1000	0	2	2.7.4.8
GTPHs	GTP amine hydrolysis (spontaneous)	gtp[c] + h[c] + h2o[c] -> nh4[c] + xtp[c]	s0001	s0001	SPONTANEOUS	Nucleotide Salvage Pathway	0	0	1000	0	1		Spontaneous reaction
GUACYC	guanylate cyclase	gtp[c] -> 35cgmp[c] + ppi[c]	SCO4928	SCO4928	cya	Nucleotide Salvage Pathway	0	0	1000	0	3	4.6.1.2		Süsstrunk U, Pidoux J, Taubert S, Ullmann A, Thompson CJ.#1998#Pleiotropic effects of cAMP on germination, antibiotic biosynthesis and morphological development in Streptomyces coelicolor.#Mol Microbiol.#30#33-46#
GUAPRT	guanine phosphoribosyltransferase	gua[c] + prpp[c] -> gmp[c] + ppi[c]	SCO3405	SCO3405	hprT	Nucleotide Salvage Pathway	0	0	1000	0	2	2.4.2.8
HXAND	hypoxanthine dehydrogenase	h2o[c] + hxan[c] + nad[c] -> h[c] + nadh[c] + xan[c]	((SCO4971 and SCO4972) or (SCO0689 and SCO0690 and SCO0691) or (SCO1132 and SCO1133 and SCO1134))	SCO4971 SCO4972 SCO0689 SCO0690 SCO0691 SCO1132 SCO1133 SCO1134		Nucleotide Salvage Pathway	0	0	1000	0	2
HXPRT	hypoxanthine phosphoribosyltransferase (Hypoxanthine)	hxan[c] + prpp[c] -> imp[c] + ppi[c]	SCO3405	SCO3405	hprT	Nucleotide Salvage Pathway	0	0	1000	0	2	2.4.2.8
INSH	Inosine hydrolase	h2o[c] + ins[c] -> hxan[c] + rib-D[c]	SCO3779	SCO3779		Nucleotide Salvage Pathway	0	0	1000	0	2	3.2.2.8
NDPK1	nucleoside-diphosphate kinase (ATP:GDP)	atp[c] + gdp[c] <=> adp[c] + gtp[c]	SCO2612	SCO2612	ndk	Nucleotide Salvage Pathway	1	-1000	1000	0	4	2.7.4.6		Brodbeck M, Rohling A, Wohlleben W, Thompson CJ, Süsstrunk U.#1996#Nucleoside-diphosphate kinase from Streptomyces coelicolor.#Eur J Biochem.#239#208-213#
NDPK2	nucleoside-diphosphate kinase (ATP:UDP)	atp[c] + udp[c] <=> adp[c] + utp[c]	SCO2612	SCO2612	ndk	Nucleotide Salvage Pathway	1	-1000	1000	0	4	2.7.4.6		Brodbeck M, Rohling A, Wohlleben W, Thompson CJ, Süsstrunk U.#1996#Nucleoside-diphosphate kinase from Streptomyces coelicolor.#Eur J Biochem.#239#208-213#
NDPK3	nucleoside-diphosphate kinase (ATP:CDP)	atp[c] + cdp[c] <=> adp[c] + ctp[c]	SCO2612	SCO2612	ndk	Nucleotide Salvage Pathway	1	-1000	1000	0	4	2.7.4.6		Brodbeck M, Rohling A, Wohlleben W, Thompson CJ, Süsstrunk U.#1996#Nucleoside-diphosphate kinase from Streptomyces coelicolor.#Eur J Biochem.#239#208-213#
NDPK4	nucleoside-diphosphate kinase (ATP:dTDP)	atp[c] + dtdp[c] <=> adp[c] + dttp[c]	SCO2612	SCO2612	ndk	Nucleotide Salvage Pathway	1	-1000	1000	0	4	2.7.4.6		Brodbeck M, Rohling A, Wohlleben W, Thompson CJ, Süsstrunk U.#1996#Nucleoside-diphosphate kinase from Streptomyces coelicolor.#Eur J Biochem.#239#208-213#
NDPK5	nucleoside-diphosphate kinase (ATP:dGDP)	atp[c] + dgdp[c] <=> adp[c] + dgtp[c]	SCO2612	SCO2612	ndk	Nucleotide Salvage Pathway	1	-1000	1000	0	4	2.7.4.6		Brodbeck M, Rohling A, Wohlleben W, Thompson CJ, Süsstrunk U.#1996#Nucleoside-diphosphate kinase from Streptomyces coelicolor.#Eur J Biochem.#239#208-213#
NDPK6	nucleoside-diphosphate kinase (ATP:dUDP)	atp[c] + dudp[c] <=> adp[c] + dutp[c]	SCO2612	SCO2612	ndk	Nucleotide Salvage Pathway	1	-1000	1000	0	4	2.7.4.6		Brodbeck M, Rohling A, Wohlleben W, Thompson CJ, Süsstrunk U.#1996#Nucleoside-diphosphate kinase from Streptomyces coelicolor.#Eur J Biochem.#239#208-213#
NDPK7	nucleoside-diphosphate kinase (ATP:dCDP)	atp[c] + dcdp[c] <=> adp[c] + dctp[c]	SCO2612	SCO2612	ndk	Nucleotide Salvage Pathway	1	-1000	1000	0	4	2.7.4.6		Brodbeck M, Rohling A, Wohlleben W, Thompson CJ, Süsstrunk U.#1996#Nucleoside-diphosphate kinase from Streptomyces coelicolor.#Eur J Biochem.#239#208-213#
NDPK8	nucleoside-diphosphate kinase (ATP:dADP)	atp[c] + dadp[c] <=> adp[c] + datp[c]	SCO2612	SCO2612	ndk	Nucleotide Salvage Pathway	1	-1000	1000	0	4	2.7.4.6		Brodbeck M, Rohling A, Wohlleben W, Thompson CJ, Süsstrunk U.#1996#Nucleoside-diphosphate kinase from Streptomyces coelicolor.#Eur J Biochem.#239#208-213#
NDPK9	nucleoside-diphosphate kinase (ATP:IDP)	atp[c] + idp[c] <=> adp[c] + itp[c]	SCO2612	SCO2612	ndk	Nucleotide Salvage Pathway	1	-1000	1000	0	4	2.7.4.6		Brodbeck M, Rohling A, Wohlleben W, Thompson CJ, Süsstrunk U.#1996#Nucleoside-diphosphate kinase from Streptomyces coelicolor.#Eur J Biochem.#239#208-213#
NNAT	nicotinate-nucleotide adenylyltransferase	atp[c] + h[c] + nicrnt[c] -> dnad[c] + ppi[c]	SCO2579	SCO2579	nadD	Nucleotide Salvage Pathway	0	0	1000	0	2	2.7.7.18
NTD10e	5'-nucleotidase (XMP)	h2o[e] + xmp[e] -> pi[e] + xtsn[e]	SCO4152	SCO4152		Nucleotide Salvage Pathway	0	0	1000	0	2	3.1.3.5
NTD11e	5'-nucleotidase (IMP)	h2o[e] + imp[e] -> ins[e] + pi[e]	SCO4152	SCO4152		Nucleotide Salvage Pathway	0	0	1000	0	2	3.1.3.5
NTD12e	5'-nucleotidase (dIMP)	dimp[e] + h2o[e] -> din[e] + pi[e]	SCO4152	SCO4152		Nucleotide Salvage Pathway	0	0	1000	0	2	3.1.3.5
NTD1e	5'-nucleotidase (dUMP)	dump[e] + h2o[e] -> duri[e] + pi[e]	SCO4152	SCO4152		Nucleotide Salvage Pathway	0	0	1000	0	2	3.1.3.5
NTD2e	5'-nucleotidase (UMP)	h2o[e] + ump[e] -> pi[e] + uri[e]	SCO4152	SCO4152		Nucleotide Salvage Pathway	0	0	1000	0	2	3.1.3.5
NTD3e	5'-nucleotidase (dCMP)	dcmp[e] + h2o[e] -> dcyt[e] + pi[e]	SCO4152	SCO4152		Nucleotide Salvage Pathway	0	0	1000	0	2	3.1.3.5
NTD4e	5'-nucleotidase (CMP)	cmp[e] + h2o[e] -> cytd[e] + pi[e]	SCO4152	SCO4152		Nucleotide Salvage Pathway	0	0	1000	0	2	3.1.3.5
NTD5e	5'-nucleotidase (dTMP)	dtmp[e] + h2o[e] -> pi[e] + thymd[e]	SCO4152	SCO4152		Nucleotide Salvage Pathway	0	0	1000	0	2	3.1.3.5
NTD6e	5'-nucleotidase (dAMP)	damp[e] + h2o[e] -> dad-2[e] + pi[e]	SCO4152	SCO4152		Nucleotide Salvage Pathway	0	0	1000	0	2	3.1.3.5
NTD7e	5'-nucleotidase (AMP)	amp[e] + h2o[e] -> adn[e] + pi[e]	SCO4152	SCO4152		Nucleotide Salvage Pathway	0	0	1000	0	2	3.1.3.5
NTD8e	5'-nucleotidase (dGMP)	dgmp[e] + h2o[e] -> dgsn[e] + pi[e]	SCO4152	SCO4152		Nucleotide Salvage Pathway	0	0	1000	0	2	3.1.3.5
NTD9e	5'-nucleotidase (GMP)	gmp[e] + h2o[e] -> gsn[e] + pi[e]	SCO4152	SCO4152		Nucleotide Salvage Pathway	0	0	1000	0	2	3.1.3.5
NTP1	nucleoside-triphosphatase (ATP)	atp[c] + h2o[c] -> adp[c] + h[c] + pi[c]	SCO6149	SCO6149		Nucleotide Salvage Pathway	0	0	1000	0	2	3.6.1.15
NTP10	nucleoside-triphosphatase (ITP)	h2o[c] + itp[c] -> h[c] + idp[c] + pi[c]	SCO6149	SCO6149		Nucleotide Salvage Pathway	0	0	1000	0	2	3.6.1.15
NTP3	nucleoside-triphosphatase (GTP)	gtp[c] + h2o[c] -> gdp[c] + h[c] + pi[c]	SCO6149	SCO6149		Nucleotide Salvage Pathway	0	0	1000	0	2	3.6.1.15
NTP5	nucleoside-triphosphatase (CTP)	ctp[c] + h2o[c] -> cdp[c] + h[c] + pi[c]	SCO6149	SCO6149		Nucleotide Salvage Pathway	0	0	1000	0	2	3.6.1.15
NTPP1	Nucleoside triphosphate pyrophosphorylase (dgtp)	dgtp[c] + h2o[c] -> dgmp[c] + h[c] + ppi[c]	SCO3100	SCO3100	mazG	Nucleotide Salvage Pathway	0	0	1000	0	2	3.6.1.19
NTPP10	Nucleoside triphosphate pyrophosphorylase (ditp)	ditp[c] + h2o[c] -> dimp[c] + h[c] + ppi[c]	SCO2902	SCO2902	rdgB	Nucleotide Salvage Pathway	0	0	1000	0	2	3.6.1.19
NTPP11	Nucleoside triphosphate pyrophosphorylase (xtp)	h2o[c] + xtp[c] -> h[c] + ppi[c] + xmp[c]	SCO2902	SCO2902	rdgB	Nucleotide Salvage Pathway	0	0	1000	0	2	3.6.1.19
NTPP2	Nucleoside triphosphate pyrophosphorylase (gtp)	gtp[c] + h2o[c] -> gmp[c] + h[c] + ppi[c]	SCO3100	SCO3100	mazG	Nucleotide Salvage Pathway	0	0	1000	0	2	3.6.1.19
NTPP3	Nucleoside triphosphate pyrophosphorylase (dctp)	dctp[c] + h2o[c] -> dcmp[c] + h[c] + ppi[c]	SCO3100	SCO3100	mazG	Nucleotide Salvage Pathway	0	0	1000	0	2	3.6.1.19
NTPP4	Nucleoside triphosphate pyrophosphorylase (ctp)	ctp[c] + h2o[c] -> cmp[c] + h[c] + ppi[c]	SCO3100	SCO3100	mazG	Nucleotide Salvage Pathway	0	0	1000	0	2	3.6.1.19
NTPP5	Nucleoside triphosphate pyrophosphorylase (datp)	datp[c] + h2o[c] -> damp[c] + h[c] + ppi[c]	SCO3100	SCO3100	mazG	Nucleotide Salvage Pathway	0	0	1000	0	2	3.6.1.19
NTPP6	Nucleoside triphosphate pyrophosphorylase (atp)	atp[c] + h2o[c] -> amp[c] + h[c] + ppi[c]	SCO3100	SCO3100	mazG	Nucleotide Salvage Pathway	0	0	1000	0	2	3.6.1.19
NTPP7	Nucleoside triphosphate pyrophosphorylase (dttp)	dttp[c] + h2o[c] -> dtmp[c] + h[c] + ppi[c]	SCO3100	SCO3100	mazG	Nucleotide Salvage Pathway	0	0	1000	0	2	3.6.1.19
NTPP8	Nucleoside triphosphate pyrophosphorylase (utp)	h2o[c] + utp[c] -> h[c] + ppi[c] + ump[c]	SCO3100	SCO3100	mazG	Nucleotide Salvage Pathway	0	0	1000	0	2	3.6.1.19
NTPP9	Nucleoside triphosphate pyrophosphorylase (itp)	h2o[c] + itp[c] -> h[c] + imp[c] + ppi[c]	SCO2902	SCO2902	rdgB	Nucleotide Salvage Pathway	0	0	1000	0	2	3.6.1.19
NTPTP1	Nucleoside triphosphate tripolyhydrolase	dgtp[c] + h2o[c] -> dgsn[c] + pppi[c]	SCO2470	SCO2470		Nucleotide Salvage Pathway	0	0	1000	0	2	3.1.5.1
NTPTP2	Nucleoside triphosphate tripolyhydrolase	gtp[c] + h2o[c] -> gsn[c] + pppi[c]	SCO2470	SCO2470		Nucleotide Salvage Pathway	0	0	1000	0	2	3.1.5.1
PDE1	3',5'-cyclic-nucleotide phosphodiesterase	camp[c] + h2o[c] -> amp[c] + h[c]	SCO6075	SCO6075		Nucleotide Salvage Pathway	0	0	1000	0	2	3.1.4.17
PDE4	3',5'-cyclic-nucleotide phosphodiesterase	35cgmp[c] + h2o[c] -> gmp[c] + h[c]	SCO6075	SCO6075		Nucleotide Salvage Pathway	0	0	1000	0	2	3.1.4.17
PUNP1	purine-nucleoside phosphorylase (Adenosine)	adn[c] + pi[c] <=> ade[c] + r1p[c]	SCO4917	SCO4917	xapA	Nucleotide Salvage Pathway	1	-1000	1000	0	2	2.4.2.1
PUNP2	purine-nucleoside phosphorylase (Deoxyadenosine)	dad-2[c] + pi[c] <=> 2dr1p[c] + ade[c]	SCO4917	SCO4917	xapA	Nucleotide Salvage Pathway	1	-1000	1000	0	2	2.4.2.1
PUNP3	purine-nucleoside phosphorylase (Guanosine)	gsn[c] + pi[c] <=> gua[c] + r1p[c]	SCO4917	SCO4917	xapA	Nucleotide Salvage Pathway	1	-1000	1000	0	2	2.4.2.1
PUNP4	purine-nucleoside phosphorylase (Deoxyguanosine)	dgsn[c] + pi[c] <=> 2dr1p[c] + gua[c]	SCO4917	SCO4917	xapA	Nucleotide Salvage Pathway	1	-1000	1000	0	2	2.4.2.1
PUNP5	purine-nucleoside phosphorylase (Inosine)	ins[c] + pi[c] <=> hxan[c] + r1p[c]	SCO4917	SCO4917	xapA	Nucleotide Salvage Pathway	1	-1000	1000	0	2	2.4.2.1
PUNP6	purine-nucleoside phosphorylase (Deoxyinosine)	din[c] + pi[c] <=> 2dr1p[c] + hxan[c]	SCO4917	SCO4917	xapA	Nucleotide Salvage Pathway	1	-1000	1000	0	2	2.4.2.1
PUNP7	purine-nucleoside phosphorylase (Xanthosine)	xtsn[c] + pi[c] <=> xan[c] + r1p[c]	SCO4917	SCO4917	xapA	Nucleotide Salvage Pathway	1	-1000	1000	0	2	2.4.2.1
RNDR1	ribonucleoside-diphosphate reductase (ADP)	adp[c] + trdrd[c] -> dadp[c] + h2o[c] + trdox[c]	(((SCO5225 and SCO5226) or SCO5805) and (SCO0885 or SCO3889 or SCO5419 or SCO5438))	SCO5225 SCO5226 SCO5805 SCO0885 SCO3889 SCO5419 SCO5438	nrdB nrdA nrdJ trxA3 trxA trxA4 trxA2	Nucleotide Salvage Pathway	0	0	1000	0	4	1.17.4.1		Borovok I, Kreisberg-Zakarin R, Yanko M, Schreiber R, Myslovati M, Aslund F, Holmgren A, Cohen G, Aharonowitz Y.#2002#Streptomyces spp. contain class Ia and class II ribonucleotide reductases: expression analysis of the genes in vegetative growth.#Microbiology.#148#391-404#
RNDR1c	ribonucleoside-diphosphate reductase (ADP) (mycothiol)	adp[c] + 2 msh[c] -> dadp[c] + mssg[c] + h2o[c]	((SCO5225 and SCO5226) or SCO5805)	SCO5225 SCO5226 SCO5805	nrdB nrdA nrdJ	Nucleotide Salvage Pathway	0	0	1000	0	4	1.17.4.1	Assumed that mycothiol do the same biological roles as glutathione	Borovok I, Kreisberg-Zakarin R, Yanko M, Schreiber R, Myslovati M, Aslund F, Holmgren A, Cohen G, Aharonowitz Y.#2002#Streptomyces spp. contain class Ia and class II ribonucleotide reductases: expression analysis of the genes in vegetative growth.#Microbiology.#148#391-404#
RNDR2	ribonucleoside-diphosphate reductase (GDP)	gdp[c] + trdrd[c] -> dgdp[c] + h2o[c] + trdox[c]	(((SCO5225 and SCO5226) or SCO5805) and (SCO0885 or SCO3889 or SCO5419 or SCO5438))	SCO5225 SCO5226 SCO5805 SCO0885 SCO3889 SCO5419 SCO5438	nrdB nrdA nrdJ trxA3 trxA trxA4 trxA2	Nucleotide Salvage Pathway	0	0	1000	0	4	1.17.4.1		Borovok I, Kreisberg-Zakarin R, Yanko M, Schreiber R, Myslovati M, Aslund F, Holmgren A, Cohen G, Aharonowitz Y.#2002#Streptomyces spp. contain class Ia and class II ribonucleotide reductases: expression analysis of the genes in vegetative growth.#Microbiology.#148#391-404#
RNDR2c	ribonucleoside-diphosphate reductase (GDP) (mycothiol)	gdp[c] + 2 msh[c] -> dgdp[c] + mssg[c] + h2o[c]	((SCO5225 and SCO5226) or SCO5805)	SCO5225 SCO5226 SCO5805	nrdB nrdA nrdJ	Nucleotide Salvage Pathway	0	0	1000	0	4	1.17.4.1	Assumed that mycothiol do the same biological roles as glutathione	Borovok I, Kreisberg-Zakarin R, Yanko M, Schreiber R, Myslovati M, Aslund F, Holmgren A, Cohen G, Aharonowitz Y.#2002#Streptomyces spp. contain class Ia and class II ribonucleotide reductases: expression analysis of the genes in vegetative growth.#Microbiology.#148#391-404#
RNDR3	ribonucleoside-diphosphate reductase (CDP)	cdp[c] + trdrd[c] -> dcdp[c] + h2o[c] + trdox[c]	(((SCO5225 and SCO5226) or SCO5805) and (SCO0885 or SCO3889 or SCO5419 or SCO5438))	SCO5225 SCO5226 SCO5805 SCO0885 SCO3889 SCO5419 SCO5438	nrdB nrdA nrdJ trxA3 trxA trxA4 trxA2	Nucleotide Salvage Pathway	0	0	1000	0	4	1.17.4.1		Borovok I, Kreisberg-Zakarin R, Yanko M, Schreiber R, Myslovati M, Aslund F, Holmgren A, Cohen G, Aharonowitz Y.#2002#Streptomyces spp. contain class Ia and class II ribonucleotide reductases: expression analysis of the genes in vegetative growth.#Microbiology.#148#391-404#
RNDR3c	ribonucleoside-diphosphate reductase (CDP) (mycothiol)	cdp[c] + 2 msh[c] -> dcdp[c] + mssg[c] + h2o[c]	((SCO5225 and SCO5226) or SCO5805)	SCO5225 SCO5226 SCO5805	nrdB nrdA nrdJ	Nucleotide Salvage Pathway	0	0	1000	0	4	1.17.4.1	Assumed that mycothiol do the same biological roles as glutathione	Borovok I, Kreisberg-Zakarin R, Yanko M, Schreiber R, Myslovati M, Aslund F, Holmgren A, Cohen G, Aharonowitz Y.#2002#Streptomyces spp. contain class Ia and class II ribonucleotide reductases: expression analysis of the genes in vegetative growth.#Microbiology.#148#391-404#
RNDR4	ribonucleoside-diphosphate reductase (UDP)	trdrd[c] + udp[c] -> dudp[c] + h2o[c] + trdox[c]	(((SCO5225 and SCO5226) or SCO5805) and (SCO0885 or SCO3889 or SCO5419 or SCO5438))	SCO5225 SCO5226 SCO5805 SCO0885 SCO3889 SCO5419 SCO5438	nrdB nrdA nrdJ trxA3 trxA trxA4 trxA2	Nucleotide Salvage Pathway	0	0	1000	0	4	1.17.4.1		Borovok I, Kreisberg-Zakarin R, Yanko M, Schreiber R, Myslovati M, Aslund F, Holmgren A, Cohen G, Aharonowitz Y.#2002#Streptomyces spp. contain class Ia and class II ribonucleotide reductases: expression analysis of the genes in vegetative growth.#Microbiology.#148#391-404#
RNDR4c	ribonucleoside-diphosphate reductase (UDP) (mycothiol)	2 msh[c] + udp[c] -> dudp[c] + mssg[c] + h2o[c]	((SCO5225 and SCO5226) or SCO5805)	SCO5225 SCO5226 SCO5805	nrdB nrdA nrdJ	Nucleotide Salvage Pathway	0	0	1000	0	4	1.17.4.1	Assumed that mycothiol do the same biological roles as glutathione	Borovok I, Kreisberg-Zakarin R, Yanko M, Schreiber R, Myslovati M, Aslund F, Holmgren A, Cohen G, Aharonowitz Y.#2002#Streptomyces spp. contain class Ia and class II ribonucleotide reductases: expression analysis of the genes in vegetative growth.#Microbiology.#148#391-404#
TMDK1	thymidine kinase (ATP:thymidine)	atp[c] + thymd[c] -> adp[c] + dtmp[c] + h[c]	SCO5845	SCO5845		Nucleotide Salvage Pathway	0	0	1000	0	2	2.7.1.21
TMDPP	thymidine phosphorylase	pi[c] + thymd[c] <=> 2dr1p[c] + thym[c]	SCO4890	SCO4890	deoA	Nucleotide Salvage Pathway	1	-1000	1000	0	2	2.4.2.4
TMDSf	thymidylate synthase (Flavin-dependent)	dump[c] + fmnh2[c] + mlthf[c] -> fmn[c] + thf[c] + dtmp[c]	SCO5743	SCO5743		Nucleotide Salvage Pathway	0	0	1000	0	2	2.1.1.45
UMPK	UMP kinase	atp[c] + ump[c] <=> adp[c] + udp[c]	SCO5626 or SCO1760	SCO5626 SCO1760	pyrH cmk	Nucleotide Salvage Pathway	1	-1000	1000	0	2	2.7.4.14
UPPRT	uracil phosphoribosyltransferase	prpp[c] + ura[c] -> ppi[c] + ump[c]	(SCO1488 or SCO4041)	SCO1488 SCO4041	pyrR	Nucleotide Salvage Pathway	0	0	1000	0	2	2.4.2.9
XAND	xanthine dehydrogenase	h2o[c] + nad[c] + xan[c] -> h[c] + nadh[c] + urate[c]	((SCO4971 and SCO4972) or (SCO0690 and SCO0691))	SCO4971 SCO4972 SCO0690 SCO0691		Nucleotide Salvage Pathway	0	0	1000	0	2	1.1.1.204
XTSNH	Xanthosine hydrolase	h2o[c] + xtsn[c] -> rib-D[c] + xan[c]	SCO3779	SCO3779		Nucleotide Salvage Pathway	0	0	1000	0	2	3.2.2.8
ATPS4r	ATP synthase (four protons for one ATP)	adp[c] + pi[c] + 4 h[e] <=> atp[c] + 3 h[c] + h2o[c]	(((SCO5369 and SCO5368 and SCO5367) and (SCO5374 and SCO5373 and SCO5372 and SCO5371 and SCO5370) and SCO5366) or ((SCO5369 and SCO5368 and SCO5367) and (SCO5374 and SCO5373 and SCO5372 and SCO5371 and SCO5370)))	SCO5369 SCO5368 SCO5367 SCO5374 SCO5373 SCO5372 SCO5371 SCO5370 SCO5366 SCO5369 SCO5368 SCO5367 SCO5374 SCO5373 SCO5372 SCO5371 SCO5370	atpF atpE atpB atpC atpD atpG atpA atpH atpI	Oxidative Phosphorylation	1	-1000	1000	0	2	3.6.3.14
CYO2a	cytochrome bc1c complex (reductase, menaquinol: 2 protons)	2 ficytc[c] + 6 h[c] + mql9[c] -> 2 focytc[c] + 6 h[e] + mqn9[c]	(SCO2150 and SCO2149 and (SCO7236 or SCO2148 or SCO7120))	SCO2150 SCO2149 SCO7236 SCO2148 SCO7120	qcrA qcrB qcrC	Oxidative Phosphorylation	0	0	1000	0	2			$Corynebacterium glutamicum#Niebisch A, Bott M.#2001#Molecular analysis of the cytochrome bc1-aa3 branch of the Corynebacterium glutamicum respiratory chain containing an unusual diheme cytochrome c1.#Arch Microbiol.#175#282-294#
CYO2b	cytochrome aa3 oxidase (2 protons)	2 focytc[c] + 0.5 o2[c] -> 2 ficytc[c] + h2o[c]	(SCO1934 and SCO2156 and (SCO7234 or SCO2155) and SCO2151 and SCO1930)	SCO1934 SCO2156 SCO7234 SCO2155 SCO2151 SCO1930	cox1 cox2 cox3 ctaD	Oxidative Phosphorylation	0	0	1000	0	2			$Corynebacterium glutamicum#Niebisch A, Bott M.#2001#Molecular analysis of the cytochrome bc1-aa3 branch of the Corynebacterium glutamicum respiratory chain containing an unusual diheme cytochrome c1.#Arch Microbiol.#175#282-294#
CYTBD2	cytochrome oxidase bd (menaquinol-9: 2 protons)	2 h[c] + mql9[c] + 0.5 o2[c] -> h2o[c] + mqn9[c] + 2 h[e]	(SCO3945 and SCO3946)	SCO3945 SCO3946	cydA cydB	Oxidative Phosphorylation	0	0	1000	0	2			$Corynebacterium glutamicum#Niebisch A, Bott M.#2001#Molecular analysis of the cytochrome bc1-aa3 branch of the Corynebacterium glutamicum respiratory chain containing an unusual diheme cytochrome c1.#Arch Microbiol.#175#282-294#
FRD8	fumarate reductase (menaquione-9)	fum[c] + mql9[c] -> mqn9[c] + succ[c]	(SCO0923 and SCO0922 and SCO0924)	SCO0923 SCO0922 SCO0924	frdA frdB frdC	Oxidative Phosphorylation	0	0	1000	0	2	1.3.99.1
G3PD6	glycerol-3-phosphate dehydrogenase (menaquinone-9)	glyc3p[c] + mqn9[c] -> dhap[c] + mql9[c]	(SCO0670 or SCO1661 or SCO4774 or (SCO7005 and SCO7006))	SCO0670 SCO1661 SCO4774 SCO7005 SCO7006	glpD	Oxidative Phosphorylation	0	0	1000	0	2	1.1.99.5
L-LACD4	L-Lactate dehydrogenase (menaquinone)	lac-L[c] + mqn9[c] -> mql9[c] + pyr[c]	(SCO0763 or (SCO0815 and SCO0816 and SCO0817))	SCO0763 SCO0815 SCO0816 SCO0817		Oxidative Phosphorylation	0	0	1000	0	2	1.1.2.3
NADH10	NADH dehydrogenase (menaquinone-9 & 0 protons)	h[c] + mqn9[c] + nadh[c] -> mql9[c] + nad[c]	(SCO3092 or SCO7101 or SCO7319 or SCO6496 or SCO0158 or SCO4119)	SCO3092 SCO7101 SCO7319 SCO6496 SCO0158 SCO4119	ndh	Oxidative Phosphorylation	0	0	1000	0	2	1.6.99.3
NADH17	NADH dehydrogenase (menaquinone-9 & 3 protons)	4 h[c] + mqn9[c] + nadh[c] -> 3 h[e] + mql9[c] + nad[c]	((SCO4562 or SCO4599) and (SCO4563 or SCO4600) and SCO4564 and (SCO3392 or SCO4565) and SCO4566 and (SCO4567 or SCO6560) and SCO4568 and (SCO4569 or SCO4602) and (SCO4570 or SCO4603) and (SCO4571 or SCO4604) and (SCO4572 or SCO4605) and (SCO4573 or SCO4606 or SCO6954) and (SCO4574 or SCO4607) and (SCO4575 or SCO4608))	SCO4562 SCO4599 SCO4563 SCO4600 SCO4564 SCO3392 SCO4565 SCO4566 SCO4567 SCO6560 SCO4568 SCO4569 SCO4602 SCO4570 SCO4603 SCO4571 SCO4604 SCO4572 SCO4605 SCO4573 SCO4606 SCO6954 SCO4574 SCO4607 SCO4575 SCO4608	nuo	Oxidative Phosphorylation	0	0	1000	0	2	1.6.5.3
NADTRHD	NAD transhydrogenase	nad[c] + nadph[c] -> nadh[c] + nadp[c]	(SCO7622 and SCO7623)	SCO7622 SCO7623	pntB pntA	Oxidative Phosphorylation	0	0	1000	0	2
NTRIR2x	nitrite Reductase (NADH)	5 h[c] + 3 nadh[c] + no2[c] -> 2 h2o[c] + 3 nad[c] + nh4[c]	(SCO2487 and SCO2488)	SCO2487 SCO2488	nirB nirD	Oxidative Phosphorylation	0	0	1000	0	3			Fischer M, Schmidt C, Falke D, Sawers RG.#2012#Terminal reduction reactions of nitrate and sulfate assimilation in Streptomyces coelicolor A3(2): identification of genes encoding nitrite and sulfite reductases.#Res Microbiol.#163#340-348#
POX3	pyruvate oxidase	h2o[c] + pyr[c] + fad[c] -> ac[c] + co2[c] + fadh2[c]	(SCO6155 or SCO7412)	SCO6155 SCO7412		Oxidative Phosphorylation	0	0	1000	0	2	1.2.2.2
PPK2r	polyphosphate kinase	atp[c] + ppi[c] <=> adp[c] + pppi[c]	SCO4145	SCO4145	ppk	Oxidative Phosphorylation	1	-1000	1000	0	2	2.7.4.1		$Streptomyces lividans#Chouayekh H, Virolle MJ.#2002#The polyphosphate kinase plays a negative role in the control of antibiotic production in Streptomyces lividans.#Mol Microbiol.#43#919-930#
QMO3	quinol monooxygenase (menaquinol 9)	mql9[c] + 2 o2[c] -> 2 h[c] + mqn9[c] + 2 o2s[c]	s0001	s0001	SPONTANEOUS	Oxidative Phosphorylation	0	0	1000	0	1		Spontaneous reaction
SUCD3	succinate dehydrogenase (menaquione-9)	mqn9[c] + succ[c] + 2 h[e] -> fum[c] + mql9[c] + 2 h[c]	((SCO4856 or SCO5107 or SCO7109) and (SCO4855 or SCO5106) and SCO4858 and SCO4857)	SCO4856 SCO5107 SCO7109 SCO4855 SCO5106 SCO4858 SCO4857	sdhA sdhB sdhC sdhD	Oxidative Phosphorylation	0	0	1000	0	2	1.3.99.1		$Bacillus subtilis#Schirawski J, Unden G.#1998#Menaquinone-dependent succinate dehydrogenase of bacteria catalyzes reversed electron transport driven by the proton potential.#Eur J Biochem.#257#210-215#
THD2	NAD(P) transhydrogenase	nadh[c] + nadp[c] + 2 h[e] -> 2 h[c] + nad[c] + nadph[c]	(SCO7622 and SCO7623)	SCO7622 SCO7623	pntB pntA	Oxidative Phosphorylation	0	0	1000	0	2	1.6.1.1
TRDR	thioredoxin reductase (NADPH)	h[c] + nadph[c] + trdox[c] -> nadp[c] + trdrd[c]	((SCO3890 or SCO6834 or SCO7298) and (SCO0885 or SCO3889 or SCO5419 or SCO5438))	SCO3890 SCO6834 SCO7298 SCO0885 SCO3889 SCO5419 SCO5438	trxB2 trxB trxA3 trxA trxA4 trxA2	Oxidative Phosphorylation	0	0	1000	0	4	1.8.1.9		Koháryová M, Brynda J, Rezáčová P, Kollárová M.#2011#Crystallization and diffraction analysis of thioredoxin reductase from Streptomyces coelicolor.#Acta Crystallogr Sect F Struct Biol Cryst Commun.#67#917-921#
EDA	2-dehydro-3-deoxy-phosphogluconate aldolase	2ddg6p[c] -> g3p[c] + pyr[c]	(SCO0852 or SCO2298 or SCO3473 or SCO3495)	SCO0852 SCO2298 SCO3473 SCO3495	kdgA	Pentose Phosphate Pathway	0	0	1000	0	2	4.1.2.14
FBA3	Sedoheptulose 1,7-bisphosphate D-glyceraldehyde-3-phosphate-lyase	s17bp[c] <=> dhap[c] + e4p[c]	SCO3649	SCO3649	fba	Pentose Phosphate Pathway	1	-1000	1000	0	2	4.1.2.13
G1DH	glucose 1-dehydrogenase	glc-D[c] + nad[c] -> g15l[c] + nadh[c] + h[c]	SCO1335	SCO1335		Pentose Phosphate Pathway	0	0	1000	0	2	1.1.1.47
G6PDH2	glucose 6-phosphate dehydrogenase	g6p[c] + nadp[c] -> 6pgl[c] + h[c] + nadph[c]	(SCO1937 or SCO6661)	SCO1937 SCO6661	zwf2 zwf	Pentose Phosphate Pathway	0	0	1000	0	3	1.1.1.49		Ryu YG, Butler MJ, Chater KF, Lee KJ.#2006#Engineering of primary carbohydrate metabolism for increased production of actinorhodin in Streptomyces coelicolor#Appl. Environ. Microbiol.#72#7132-7139#
GLNLASE	gluconolactonase	g15l[c] + h2o[c] <=> glcn[c] + h[c]	SCO0524	SCO0524		Pentose Phosphate Pathway	1	-1000	1000	0	2	3.1.1.17
GND	phosphogluconate dehydrogenase (NADP)	6pgc[c] + nadp[c] -> co2[c] + nadph[c] + ru5p-D[c]	(SCO0975 or SCO3877 or SCO6658)	SCO0975 SCO3877 SCO6658	zwf3	Pentose Phosphate Pathway	0	0	0	0	2	1.1.1.44	Unknown cofactor specificity
GND2	phosphogluconate dehydrogenase (NAD)	6pgc[c] + nad[c] -> co2[c] + nadh[c] + ru5p-D[c]	(SCO0975 or SCO3877 or SCO6658)	SCO0975 SCO3877 SCO6658	zwf3	Pentose Phosphate Pathway	0	0	1000	0	2	1.1.1.44	Unknown cofactor specificity
PFK_3	phosphofructokinase (s7p)	atp[c] + s7p[c] -> adp[c] + h[c] + s17bp[c]	(SCO5426 or SCO2119 or SCO1214)	SCO5426 SCO2119 SCO1214	pfkA2 pfkA pfkA3	Pentose Phosphate Pathway	0	0	1000	0	2	2.7.1.11
PGL	6-phosphogluconolactonase	6pgl[c] + h2o[c] -> 6pgc[c] + h[c]	SCO1939	SCO1939		Pentose Phosphate Pathway	0	0	1000	0	2	3.1.1.31
PKT	phosphoketolase	xu5p-D[c] + pi[c] -> actp[c] + g3p[c] + h2o[c]	SCO0617	SCO0617		Pentose Phosphate Pathway	0	0	1000	0	2	4.1.2.9		Borodina I, Siebring J, Zhang J, Smith CP, van Keulen G, Dijkhuizen L, Nielsen J.#2008#Antibiotic overproduction in Streptomyces coelicolor A3 2 mediated by phosphofructokinase deletion.#J. Biol. Chem.#283#25186-25199#
RPE	ribulose 5-phosphate 3-epimerase	ru5p-D[c] <=> xu5p-D[c]	SCO1464	SCO1464	rpe	Pentose Phosphate Pathway	1	-1000	1000	0	2	5.1.3.1
RPI	ribose-5-phosphate isomerase	r5p[c] <=> ru5p-D[c]	(SCO0579 or SCO1224 or SCO2627)	SCO0579 SCO1224 SCO2627		Pentose Phosphate Pathway	1	-1000	1000	0	2	5.3.1.6
TALA	transaldolase	g3p[c] + s7p[c] <=> e4p[c] + f6p[c]	(SCO1936 or SCO6662)	SCO1936 SCO6662	tal2 tal1	Pentose Phosphate Pathway	1	-1000	1000	0	2	2.2.1.2
TKT1	transketolase	r5p[c] + xu5p-D[c] <=> g3p[c] + s7p[c]	(SCO1935 or SCO6497 or SCO6663)	SCO1935 SCO6497 SCO6663	tktA1 tktA2 tktB	Pentose Phosphate Pathway	1	-1000	1000	0	2	2.2.1.1
TKT2	transketolase	e4p[c] + xu5p-D[c] <=> f6p[c] + g3p[c]	(SCO1935 or SCO6497 or SCO6663)	SCO1935 SCO6497 SCO6663	tktA1 tktA2 tktB	Pentose Phosphate Pathway	1	-1000	1000	0	2	2.2.1.1
MME	methylmalonyl-CoA epimerase	mmcoa-R[c] <=> mmcoa-S[c]	SCO5398	SCO5398		Propanoate Metabolism	1	-1000	1000	0	2	5.1.99.1
MMM	methylmalonyl-CoA mutase	succoa[c] <=> mmcoa-R[c]	(SCO6832 or SCO4869)	SCO6832 SCO4869	mutA mutA2	Propanoate Metabolism	1	-1000	1000	0	2	5.4.99.2
MMSAD3	methylmalonate-semialdehyde dehydrogenase (malonic semialdehyde)	msa[c] + coa[c] + nad[c] -> accoa[c] + co2[c] + nadh[c]	SCO2726	SCO2726	msdA	Propanoate Metabolism	0	0	1000	0	3	1.2.1.27		Zhang YX, Tang L, Hutchinson CR.#1996#Cloning and characterization of a gene (msdA) encoding methylmalonic acid semialdehyde dehydrogenase from Streptomyces coelicolor.#J Bacteriol.#178#490-495#
MMSAD4	methylmalonate-semialdehyde dehydrogenase (methymalonate semialdehyde)	mmtsa[c] + coa[c] + nad[c] -> ppcoa[c] + co2[c] + nadh[c]	SCO2726	SCO2726	msdA	Propanoate Metabolism	0	0	1000	0	4	1.2.1.27		Zhang YX, Tang L, Hutchinson CR.#1996#Cloning and characterization of a gene (msdA) encoding methylmalonic acid semialdehyde dehydrogenase from Streptomyces coelicolor.#J Bacteriol.#178#490-495#
MMSAD5	methylmalonate-semialdehyde dehydrogenase (methymalonate semialdehyde, non-decarboxylating)	mmtsa[c] + coa[c] + nad[c] -> h[c] + nadh[c] + mmcoa-R[c]	SCO2726	SCO2726	msdA	Propanoate Metabolism	0	0	1000	0	4	1.2.1.18		Zhang YX, Tang L, Hutchinson CR.#1996#Cloning and characterization of a gene (msdA) encoding methylmalonic acid semialdehyde dehydrogenase from Streptomyces coelicolor.#J Bacteriol.#178#490-495#
PPCOAC	propionyl-CoA carboxylase	ppcoa[c] + atp[c] + hco3[c] -> adp[c] + h[c] + mmcoa-S[c] + pi[c]	((SCO2776 and SCO2777) or (SCO4380 and SCO4381) or ((SCO4921 or SCO6271) and (SCO4925 and SCO4926)))	SCO2776 SCO2777 SCO4380 SCO4381 SCO4921 SCO6271 SCO4925 SCO4926	accD1 accC accA2 accA1 pccE pccB	Propanoate Metabolism	0	0	1000	0	4	6.4.1.3		Rodríguez E, Gramajo H.#1999#Genetic and biochemical characterization of the alpha and beta components of a propionyl-CoA carboxylase complex of Streptomyces coelicolor A3(2).#Microbiology.#145#3109-3119##Diacovich L, Peirú S, Kurth D, Rodríguez E, Podestá F, Khosla C, Gramajo H.#2002#Kinetic and structural analysis of a new group of Acyl-CoA carboxylases found in Streptomyces coelicolor A3(2).#J…
ADSL1r	adenylsuccinate lyase	dcamp[c] <=> amp[c] + fum[c]	SCO1254	SCO1254	purB	Purine and Pyrimidine Biosynthesis	1	-1000	1000	0	2	4.3.2.2
ADSL2r	adenylosuccinate lyase	25aics[c] <=> aicar[c] + fum[c]	SCO1254	SCO1254	purB	Purine and Pyrimidine Biosynthesis	1	-1000	1000	0	2	4.3.2.2
ADSS	adenylosuccinate synthase	asp-L[c] + gtp[c] + imp[c] -> dcamp[c] + gdp[c] + 2 h[c] + pi[c]	SCO3629	SCO3629	purA	Purine and Pyrimidine Biosynthesis	0	0	1000	0	2	6.3.4.4
AICART	phosphoribosylaminoimidazolecarboxamide formyltransferase	10fthf[c] + aicar[c] <=> fprica[c] + thf[c]	SCO4814	SCO4814	purH	Purine and Pyrimidine Biosynthesis	1	-1000	1000	0	2	2.1.2.3
AIRCr	phosphoribosylaminoimidazole carboxylase	air[c] + co2[c] <=> 5aizc[c] + h[c]	(SCO3059 and SCO3060)	SCO3059 SCO3060	purE purK	Purine and Pyrimidine Biosynthesis	1	-1000	1000	0	2	4.1.1.21
ASPCT	aspartate carbamoyltransferase	asp-L[c] + cbp[c] -> cbasp[c] + h[c] + pi[c]	SCO1487	SCO1487	pyrB	Purine and Pyrimidine Biosynthesis	0	0	1000	0	2	2.1.3.2
CTPS1	CTP synthase (NH3)	atp[c] + nh4[c] + utp[c] -> adp[c] + ctp[c] + 2 h[c] + pi[c]	SCO1776	SCO1776	pyrG	Purine and Pyrimidine Biosynthesis	0	0	1000	0	2	6.3.4.2
CTPS2	CTP synthase (glutamine)	atp[c] + gln-L[c] + h2o[c] + utp[c] -> adp[c] + ctp[c] + glu-L[c] + 2 h[c] + pi[c]	SCO1776	SCO1776	pyrG	Purine and Pyrimidine Biosynthesis	0	0	1000	0	2	6.3.4.2
DHORD5	dihydroorotic acid (menaquinone-9)	dhor-S[c] + mqn9[c] -> mql9[c] + orot[c]	SCO1482	SCO1482	pyrD	Purine and Pyrimidine Biosynthesis	0	0	1000	0	2	1.3.3.1
DHORTS	dihydroorotase	dhor-S[c] + h2o[c] <=> cbasp[c] + h[c]	SCO1486	SCO1486	pyrC	Purine and Pyrimidine Biosynthesis	1	-1000	1000	0	2	3.5.2.3
GARFT	phosphoribosylglycinamide formyltransferase	10fthf[c] + gar[c] <=> fgam[c] + h[c] + thf[c]	SCO4813	SCO4813	purN	Purine and Pyrimidine Biosynthesis	1	-1000	1000	0	2	2.1.2.2
GLUPRT	glutamine phosphoribosyldiphosphate amidotransferase	gln-L[c] + h2o[c] + prpp[c] -> glu-L[c] + ppi[c] + pram[c]	SCO4086	SCO4086	purF	Purine and Pyrimidine Biosynthesis	0	0	1000	0	2	2.4.2.14
GMPS2	GMP synthase	atp[c] + gln-L[c] + h2o[c] + xmp[c] -> amp[c] + glu-L[c] + gmp[c] + 2 h[c] + ppi[c]	SCO4785	SCO4785	guaA	Purine and Pyrimidine Biosynthesis	0	0	1000	0	2	6.3.5.2
IMPC	IMP cyclohydrolase	h2o[c] + imp[c] <=> fprica[c]	SCO4814	SCO4814	purH	Purine and Pyrimidine Biosynthesis	1	-1000	1000	0	2	3.5.4.10
IMPD	IMP dehydrogenase	h2o[c] + imp[c] + nad[c] -> h[c] + nadh[c] + xmp[c]	((SCO4770 and SCO4771) or SCO1461)	SCO4770 SCO4771 SCO1461	guaB guaB2	Purine and Pyrimidine Biosynthesis	0	0	1000	0	2	1.1.1.205
OMPDC	orotidine-5'-phosphate decarboxylase	h[c] + orot5p[c] -> co2[c] + ump[c]	SCO1481	SCO1481	pyrF	Purine and Pyrimidine Biosynthesis	0	0	1000	0	2	4.1.1.23
ORPT	orotate phosphoribosyltransferase	orot5p[c] + ppi[c] <=> orot[c] + prpp[c]	SCO3650	SCO3650	pyrE	Purine and Pyrimidine Biosynthesis	1	-1000	1000	0	2	2.4.2.10
PRAGSr	phosphoribosylglycinamide synthase	atp[c] + gly[c] + pram[c] <=> adp[c] + gar[c] + h[c] + pi[c]	SCO4068	SCO4068	purD	Purine and Pyrimidine Biosynthesis	1	-1000	1000	0	2	6.3.4.13
PRAIS	phosphoribosylaminoimidazole synthase	atp[c] + fpram[c] -> adp[c] + air[c] + 2 h[c] + pi[c]	SCO4087	SCO4087	purM	Purine and Pyrimidine Biosynthesis	0	0	1000	0	2	6.3.3.1
PRASCSi	phosphoribosylaminoimidazolesuccinocarboxamide synthase	5aizc[c] + asp-L[c] + atp[c] -> 25aics[c] + adp[c] + h[c] + pi[c]	SCO4071	SCO4071	purC	Purine and Pyrimidine Biosynthesis	0	0	1000	0	2	6.3.2.6
PRFGS	phosphoribosylformylglycinamidine synthase	atp[c] + fgam[c] + gln-L[c] + h2o[c] -> adp[c] + fpram[c] + glu-L[c] + h[c] + pi[c]	(SCO4077 and SCO4078 and SCO4079)	SCO4077 SCO4078 SCO4079	purS purQ purL	Purine and Pyrimidine Biosynthesis	0	0	1000	0	2	6.3.5.3
ACKr	acetate kinase	ac[c] + atp[c] <=> actp[c] + adp[c]	SCO5424	SCO5424	ackA	Pyruvate Metabolism	1	-1000	1000	0	3	2.7.2.1		Hutchings MI, Hong HJ, Buttner MJ.#2006#The vancomycin resistance VanRS two-component signal transduction system of Streptomyces coelicolor.#Mol Microbiol.#59#923-935#
ACS	acetyl-CoA synthetase	ac[c] + atp[c] + coa[c] -> accoa[c] + amp[c] + ppi[c]	SCO3563	SCO3563	acsA	Pyruvate Metabolism	0	0	1000	0	2	6.2.1.1
ALCD2x	alcohol dehydrogenase (ethanol)	etoh[c] + nad[c] <=> acald[c] + h[c] + nadh[c]	(SCO0199 or SCO0259 or SCO5262 or SCO7362)	SCO0199 SCO0259 SCO5262 SCO7362		Pyruvate Metabolism	1	-1000	1000	0	2	1.1.1.1
ALCD2y	alcohol dehydrogenase (ethanol, NADP)	etoh[c] + nadp[c] <=> acald[c] + h[c] + nadph[c]	(SCO4945 or SCO4271)	SCO4945 SCO4271		Pyruvate Metabolism	1	-1000	1000	0	2	1.1.1.2
LDH_D	D-lactate dehydrogenase	lac-D[c] + nad[c] <=> h[c] + nadh[c] + pyr[c]	(SCO2118 or SCO3594)	SCO2118 SCO3594	dldh vanH	Pyruvate Metabolism	1	-1000	1000	0	3	1.1.1.28		Hong,H.J., M.I.Hutchings, J.M.Neu, G.D.Wright, M.S.Paget, and M.J.Buttner.#2004#Characterization of an inducible vancomycin resistance system in Streptomyces coelicolor reveals a novel gene (vanK) required for drug resistance#Mol. Microbiol.#52#1107-1121#
PC	pyruvate carboxylase	pyr[c] + atp[c] + hco3[c] -> adp[c] + h[c] + oaa[c] + pi[c]	SCO0546	SCO0546	pyc	Pyruvate Metabolism	0	0	1000	0	2	6.4.1.1
PTAr	phosphotransacetylase	accoa[c] + pi[c] <=> actp[c] + coa[c]	SCO5425	SCO5425	pta	Pyruvate Metabolism	1	-1000	1000	0	3	2.3.1.8		Hutchings MI, Hong HJ, Buttner MJ.#2006#The vancomycin resistance VanRS two-component signal transduction system of Streptomyces coelicolor.#Mol Microbiol.#59#923-935#
G3PCT	glycerol-3-phosphate cytidylyltransferase	ctp[c] + glyc3p[c] + h[c] -> cdpglyc[c] + ppi[c]				Teichoic Acid Biosynthesis	0	0	1000	0	1	2.7.7.39	Required for growth (teichoic acid biosynthesis)
TAGO	Tag O reaction for initiation of teichoic acid	2 h2o[c] + uacgam[c] -> acgam[c] + 2 h[c] + pi[c] + ump[c]				Teichoic Acid Biosynthesis	0	0	1000	0	1		Required for growth (teichoic acid biosynthesis)
TECA1S	glycerol teichoic acid synthesis (no sub, n=25)	acgam[c] + 25 cdpglyc[c] + uacmam[c] -> 25 cmp[c] + gtca1[c] + 26 h[c] + udp[c]				Teichoic Acid Biosynthesis	0	0	1000	0	1		Required for growth (teichoic acid biosynthesis)
TECA2S	glycerol techoic acid synthesis (D-ala, n=25)	acgam[c] + 25 ala-D[c] + 25 atp[c] + 25 cdpglyc[c] + uacmam[c] -> 25 amp[c] + 25 cmp[c] + gtca2[c] + 26 h[c] + 25 ppi[c] + udp[c]				Teichoic Acid Biosynthesis	0	0	1000	0	1		Required for growth (teichoic acid biosynthesis)
TECA3S	glycerol teichoic acid synthesis (n=25, glucose sub)	acgam[c] + 25 cdpglyc[c] + uacmam[c] + 25 udpg[c] -> 25 cmp[c] + gtca3[c] + 51 h[c] + 26 udp[c]				Teichoic Acid Biosynthesis	0	0	1000	0	1		Required for growth (teichoic acid biosynthesis)
2OXOADOX	2-Oxoadipate:lipoamde 2-oxidoreductase(decarboxylating and acceptor-succinylating)	2oxoadp[c] + coa[c] + nad[c] -> co2[c] + glutcoa[c] + nadh[c]	(SCO5281 and (SCO2181 or SCO7123) and (SCO0884 or SCO2180 or SCO4919))	SCO5281 SCO2181 SCO7123 SCO0884 SCO2180 SCO4919	kgd sucB udrA pdhL	Threonine and Lysine Metabolism	0	0	1000	0	2	1.2.4.2
AOBUTDs	L-2-amino-3-oxobutanoate decarboxylation (spontaneous)	2aobut[c] + h[c] -> aact[c] + co2[c]	s0001	s0001	SPONTANEOUS	Threonine and Lysine Metabolism	0	0	1000	0	1		Spontaneous reaction
APTNAT	5-aminopentanoate:2-oxoglutarate aminotransferase	5aptn[c] + akg[c] <=> glu-L[c] + oxptn[c]				Threonine and Lysine Metabolism	1	-1000	1000	0	1	2.6.1.48	Required for growth using L-lysine as a carbon source
ASAD	aspartate-semialdehyde dehydrogenase	aspsa[c] + nadp[c] + pi[c] <=> 4pasp[c] + h[c] + nadph[c]	(SCO2640 or SCO3614)	SCO2640 SCO3614	asd1	Threonine and Lysine Metabolism	1	-1000	1000	0	2	1.2.1.11
ASPK	aspartate kinase	asp-L[c] + atp[c] <=> 4pasp[c] + adp[c]	SCO3615	SCO3615	ask	Threonine and Lysine Metabolism	1	-1000	1000	0	2	2.7.2.4
DAPAT	Cadaverine aminotranferase	15dap[c] + akg[c] -> glu-L[c] + h[c] + h2o[c] + pprdn[c]				Threonine and Lysine Metabolism	0	0	1000	0	1		Required for growth using L-lysine as a carbon source
DAPDC	diaminopimelate decarboxylase	26dap-M[c] + h[c] -> co2[c] + lys-L[c]	(SCO5353 or SCO6438)	SCO5353 SCO6438	lysA	Threonine and Lysine Metabolism	0	0	1000	0	2	4.1.1.20
DAPE	diaminopimelate epimerase	26dap-LL[c] <=> 26dap-M[c]	SCO5793	SCO5793	dapF	Threonine and Lysine Metabolism	1	-1000	1000	0	2	5.1.1.7
DHDPRy	dihydrodipicolinate reductase (NADPH)	23dhdp[c] + h[c] + nadph[c] -> nadp[c] + thdp[c]	SCO5739	SCO5739	dapB	Threonine and Lysine Metabolism	0	0	1000	0	2	1.3.1.26
DHDPS	dihydrodipicolinate synthase	aspsa[c] + pyr[c] -> 23dhdp[c] + h[c] + 2 h2o[c]	(SCO1889 or SCO1912 or SCO5744 or SCO6292)	SCO1889 SCO1912 SCO5744 SCO6292	dapA	Threonine and Lysine Metabolism	0	0	1000	0	2	4.2.1.52
ECOAH1	3-hydroxyacyl-CoA dehydratase (3-hydroxybutanoyl-CoA)	3hbcoa[c] <=> b2coa[c] + h2o[c]	(SCO6732 or SCO4384)	SCO6732 SCO4384		Threonine and Lysine Metabolism	1	-1000	1000	0	2	4.2.1.17
GLCOAS	glutaryl-CoA synthetase	atp[c] + coa[c] + glutar[c] -> adp[c] + glutcoa[c] + pi[c]				Threonine and Lysine Metabolism	0	0	1000	0	1	6.2.1.6	Required for growth using L-lysine as a carbon source
GLUTCOADHc	glutaryl-CoA dehydrogenase (citosol)	fad[c] + glutcoa[c] + h[c] -> b2coa[c] + co2[c] + fadh2[c]	SCO1750	SCO1750		Threonine and Lysine Metabolism	0	0	1000	0	2	1.3.99.7
HSDy	homoserine dehydrogenase (NADPH)	hom-L[c] + nadp[c] <=> aspsa[c] + h[c] + nadph[c]	(SCO0420 or SCO5354)	SCO0420 SCO5354	thrA	Threonine and Lysine Metabolism	1	-1000	1000	0	2	1.1.1.3
HSK	homoserine kinase	atp[c] + hom-L[c] -> adp[c] + h[c] + phom[c]	SCO5356	SCO5356	thrB	Threonine and Lysine Metabolism	0	0	1000	0	2	2.7.1.39
LYSDC	lysine decarboxylase	h[c] + lys-L[c] -> 15dap[c] + co2[c]	SCO7311	SCO7311		Threonine and Lysine Metabolism	0	0	1000	0	2	4.1.1.18		$Streptomyces lividans#Madduri K, Stuttard C, Vining LC.#1989#Lysine catabolism in Streptomyces spp. is primarily through cadaverine: beta-lactam producers also make alpha-aminoadipate.#J Bacteriol.#171#299-302#
OXPTNDH	glutarate-semialdehyde:NAD+ oxidoreductase	h2o[c] + nad[c] + oxptn[c] <=> glutar[c] + 2 h[c] + nadh[c]				Threonine and Lysine Metabolism	1	-1000	1000	0	1	1.2.1.20	Required for growth using L-lysine as a carbon source
PPRDNDH	Piperideine dehydrogenase	2 h2o[c] + nad[c] + pprdn[c] -> 5aptn[c] + h[c] + nadh[c]				Threonine and Lysine Metabolism	0	0	1000	0	1		Required for growth using L-lysine as a carbon source	$Streptomyces lividans#Madduri K, Stuttard C, Vining LC.#1989#Lysine catabolism in Streptomyces spp. is primarily through cadaverine: beta-lactam producers also make alpha-aminoadipate.#J Bacteriol.#171#299-302#
SDPDS	succinyl-diaminopimelate desuccinylase	h2o[c] + sl26da[c] -> 26dap-LL[c] + succ[c]	SCO5139	SCO5139	dapE	Threonine and Lysine Metabolism	0	0	1000	0	2	3.5.1.18
SDPTA	succinyldiaminopimelate transaminase	akg[c] + sl26da[c] <=> glu-L[c] + sl2a6o[c]	SCO1577	SCO1577	argD	Threonine and Lysine Metabolism	1	-1000	1000	0	2	2.6.1.17		$Escherichia coli#Ledwidge R, Blanchard JS.#1999#The dual biosynthetic capability of N-acetylornithine aminotransferase in arginine and lysine biosynthesis.#Biochemistry.#38#3019-3024
THDPS	tetrahydrodipicolinate succinylase	h2o[c] + succoa[c] + thdp[c] -> coa[c] + sl2a6o[c]	SCO1916	SCO1916		Threonine and Lysine Metabolism	0	0	1000	0	2	2.3.1.117
THRA2i	L-allo-Threonine Aldolase	athr-L[c] -> acald[c] + gly[c]	(SCO1087 or SCO4837 or SCO5470 or SCO5364)	SCO1087 SCO4837 SCO5470 SCO5364	glyA1 glyA2 glyA3	Threonine and Lysine Metabolism	0	0	1000	0	4	4.1.2.5		Balk SH, Yoshioka H, Yukawa H, Harayama S.#2007#Synthesis of L-threo-3,4-dihydroxyphenylserine (L-threo-DOPS) with thermostabilized low-specific L-threonine aldolase from Streptomyces coelicolor A3(2).#J Microbiol Biotechnol.#17#721-727#
THRAi	Threonine aldolase	thr-L[c] -> acald[c] + gly[c]	(SCO1087 or SCO4837 or SCO5470 or SCO5364)	SCO1087 SCO4837 SCO5470 SCO5364	glyA1 glyA2 glyA3	Threonine and Lysine Metabolism	0	0	1000	0	4	4.1.2.5		Balk SH, Yoshioka H, Yukawa H, Harayama S.#2007#Synthesis of L-threo-3,4-dihydroxyphenylserine (L-threo-DOPS) with thermostabilized low-specific L-threonine aldolase from Streptomyces coelicolor A3(2).#J Microbiol Biotechnol.#17#721-727#
THRS	threonine synthase	h2o[c] + phom[c] -> pi[c] + thr-L[c]	(SCO4293 or SCO5355)	SCO4293 SCO5355	thrC	Threonine and Lysine Metabolism	0	0	1000	0	2	4.2.3.1
14GLUCANabc	1,4-alpha-D-glucan transport via ABC system	atp[c] + h2o[c] + 14glucan[e] -> 14glucan[c] + adp[c] + h[c] + pi[c]	(SCO2229 and SCO2230 and SCO2231 and SCO4240)	SCO2229 SCO2230 SCO2231 SCO4240	malG malF malE msiK	Transport, Membrane	0	0	1000	0	3			Saito A, Fujii T, Shinya T, Shibuya N, Ando A, Miyashita K.#2008#The msiK gene, encoding the ATP-hydrolysing component of N,N'-diacetylchitobiose ABC transporters, is essential for induction of chitinase production in Streptomyces coelicolor A3(2).#Microbiology.#154#3358-3365#
5DGLCNt2r	5-Dehydro-D-gluconate transport via proton symport, reversible	5dglcn[e] + h[e] <=> 5dglcn[c] + h[c]	(SCO1680 or SCO4991)	SCO1680 SCO4991		Transport, Membrane	1	-1000	1000	0	2
5MTRt	5-Methylthio-D-ribose transport via proton symport	5mtr[c] + h[c] -> 5mtr[e] + h[e]				Transport, Membrane	0	0	1000	0	1		Required for growth (spermidine, spermine biosynthesis)
ABTabc	D-arabinitol transport via ABC system	atp[c] + h2o[c] + abt-D[e] -> adp[c] + h[c] + pi[c] + abt-D[c]	(SCO1899 and SCO1900 and SCO1898 and SCO4240)	SCO1899 SCO1900 SCO1898 SCO4240	msiK	Transport, Membrane	0	0	1000	0	2
ABUTt2	4-aminobutyrate transport in via proton symport	4abut[e] + h[e] -> 4abut[c] + h[c]	(SCO2628 or SCO2631)	SCO2628 SCO2631		Transport, Membrane	0	0	1000	0	2
ACALDt	acetaldehyde reversible transport	acald[e] <=> acald[c]	s0001	s0001	SPONTANEOUS	Transport, Membrane	1	-1000	1000	0	1		Spontaneous reaction
ACGApts	N-Acetyl-D-glucosamine transport via PEP:Pyr PTS	pep[c] + acgam[e] -> acgam6p[c] + pyr[c]	(SCO2905 and SCO2906 and SCO2907 and SCO1391 and SCO5841)	SCO2905 SCO2906 SCO2907 SCO1391 SCO5841	nagF nagE1 nagE2 ptsI ptsH	Transport, Membrane	0	0	1000	0	3			Nothaft H, Dresel D, Willimek A, Mahr K, Niederweis M, Titgemeyer F.#2003#The phosphotransferase system of Streptomyces coelicolor is biased for N-acetylglucosamine metabolism.#J Bacteriol.#185#7019-7023##Nothaft H, Rigali S, Boomsma B, Swiatek M, McDowall KJ, van Wezel GP, Titgemeyer F.#2010#The permease gene nagE2 is the key to N-acetylglucosamine sensing and utilization in Streptomyces coelico…
ACSERt	O-Acetyl-L-serine transport via facilitated transport	acser[c] <=> acser[e]	SCO2756	SCO2756		Transport, Membrane	1	-1000	1000	0	2
ACt4	Na+/Acetate symport	ac[e] + na1[e] -> ac[c] + na1[c]	SCO1822	SCO1822		Transport, Membrane	0	0	1000	0	2
ACTt	actinorhodin transport via facilitated transport	ACT[c] + 2 nad[c] -> gACT[e] + 2 nadh[c]	(SCO5083 and SCO5084)	SCO5083 SCO5084	actIIORF2 actIIORF3	Transport, Membrane	0	0	1000	0	3			Xu Y, Willems A, Au-Yeung C, Tahlan K, Nodwell JR.#2012#A two-step mechanism for the activation of actinorhodin export and resistance in Streptomyces coelicolor.#MBio.#3#e00191-12#
ADEt2r	adenine transport via proton symport (reversible)	ade[e] + h[e] <=> ade[c] + h[c]	(SCO6212 or SCO6214 or SCO4334 or SCO6173)	SCO6212 SCO6214 SCO4334 SCO6173		Transport, Membrane	1	-1000	1000	0	2
ADNt2r	adenosine transport in via proton symport, reversible	adn[e] + h[e] <=> adn[c] + h[c]				Transport, Membrane	1	-1000	1000	0	1		To utilize extracellular nucleoside
AKGt2r	2-oxoglutarate reversible transport via symport	akg[e] + h[e] <=> akg[c] + h[c]	SCO6690	SCO6690		Transport, Membrane	1	-1000	1000	0	2
ALAabc	L-alanine transport via ABC system	atp[c] + h2o[c] + ala-L[e] -> adp[c] + ala-L[c] + h[c] + pi[c]	((SCO0709 and SCO0710 and SCO0707 and SCO0708 and SCO0706) or (SCO2011 and SCO2012 and SCO2009 and SCO2010 and SCO2008) or (SCO7181 and SCO7182 and SCO7183 and SCO7184 and SCO7185))	SCO0709 SCO0710 SCO0707 SCO0708 SCO0706 SCO2011 SCO2012 SCO2009 SCO2010 SCO2008 SCO7181 SCO7182 SCO7183 SCO7184 SCO7185		Transport, Membrane	0	0	1000	0	2
ALAALAabc	D-alanyl-D-alanine (DalaDala) transport via ABC system	atp[c] + h2o[c] + alaala[e] -> adp[c] + alaala[c] + h[c] + pi[c]	((SCO5115 and SCO5112 and SCO5114 and SCO5110 and SCO5113) or (SCO5120 and SCO5121 and SCO5118 and SCO5119 and SCO5117) or (SCO5712 and SCO5713 and SCO5714 and SCO5716))	SCO5115 SCO5112 SCO5114 SCO5110 SCO5113 SCO5120 SCO5121 SCO5118 SCO5119 SCO5117 SCO5712 SCO5713 SCO5714 SCO5716	bldKD bldKA bldKC bldKB	Transport, Membrane	0	0	1000	0	2
ALAt2r	L-alanine reversible transport via proton symport	ala-L[e] + h[e] <=> ala-L[c] + h[c]	SCO2914	SCO2914		Transport, Membrane	1	-1000	1000	0	2
ALAt4	L-alanine transport in via sodium symport	ala-L[e] + na1[e] -> ala-L[c] + na1[c]	SCO7197	SCO7197		Transport, Membrane	0	0	1000	0	2
ALLTNt2r	allantoin transport in via proton symport	alltn[e] + h[e] <=> alltn[c] + h[c]	(SCO6417 or SCO7500)	SCO6417 SCO7500		Transport, Membrane	1	-1000	1000	0	2
ARBabc	L-arabinose transport via ABC system	atp[c] + h2o[c] + arab-L[e] -> adp[c] + arab-L[c] + h[c] + pi[c]	(SCO6567 and SCO6568 and SCO6569)	SCO6567 SCO6568 SCO6569		Transport, Membrane	0	0	1000	0	2
ARGabc	L-arginine transport via ABC system	atp[c] + h2o[c] + arg-L[e] -> adp[c] + arg-L[c] + h[c] + pi[c]	(SCO2831 and SCO2829 and SCO2830 and SCO2828)	SCO2831 SCO2829 SCO2830 SCO2828		Transport, Membrane	0	0	1000	0	2
ARGAGMt7	Arginine/agmatine antiport	agm[c] + arg-L[e] <=> arg-L[c] + agm[e]	SCO6528	SCO6528		Transport, Membrane	1	-1000	1000	0	2
ARGt3	L-arginine transport out via proton antiport	arg-L[c] + h[e] -> h[c] + arg-L[e]	SCO7308	SCO7308		Transport, Membrane	0	0	1000	0	2
ASNt2r	L-asparagine reversible transport via proton symport	asn-L[e] + h[e] <=> asn-L[c] + h[c]	SCO6734	SCO6734		Transport, Membrane	1	-1000	1000	0	2
ASO3t8	arsenite efflux via ATP hydrolysis	aso3[c] + atp[c] + h2o[c] -> adp[c] + h[c] + pi[c] + aso3[e]	(SCO7367 or SCO3577 or SCO3578)	SCO7367 SCO3577 SCO3578		Transport, Membrane	0	0	1000	0	2
ASPabc	L-aspartate transport via ABC system	atp[c] + h2o[c] + asp-L[e] -> adp[c] + asp-L[c] + h[c] + pi[c]	(SCO5777 and SCO5774 and SCO5775 and SCO5776)	SCO5777 SCO5774 SCO5775 SCO5776	gluA gluD gluC gluB	Transport, Membrane	0	0	1000	0	2
ASPt2	L-aspartate transport in via proton symport	asp-L[e] + h[e] -> asp-L[c] + h[c]	SCO4498	SCO4498		Transport, Membrane	0	0	1000	0	2
ASPt2_2	Aspartate transport via proton symport (2 H)	asp-L[e] + 2 h[e] -> asp-L[c] + 2 h[c]	SCO5436	SCO5436		Transport, Membrane	0	0	1000	0	2
BALAt2	beta-alanine transport in via proton symport	ala-B[e] + h[e] -> ala-B[c] + h[c]	SCO2914	SCO2914		Transport, Membrane	0	0	1000	0	2
BHBt	(R)-3-Hydroxybutanoate transport via proton symport	bhb[e] + h[e] <=> bhb[c] + h[c]				Transport, Membrane	1	-1000	1000	0	1		Required for growth using (R)-3-Hydroxybutanoate as a carbon source
BTNt2i	Biotin transport via proton symport	btn[e] + h[e] -> btn[c] + h[c]				Transport, Membrane	0	0	1000	0	1		To utilize extracellular biotin
CADVt	Lysine/Cadaverine antiporter	15dap[c] + h[e] + lys-L[e] -> h[c] + lys-L[c] + 15dap[e]				Transport, Membrane	0	0	1000	0	1		Required to secrete cadaverine
CBIuabc	Cobinamide transport via ABC system (uptake)	atp[c] + h2o[c] + cbi[e] -> adp[c] + cbi[c] + h[c] + pi[c]				Transport, Membrane	0	0	1000	0	1		To utilize extracellular cobinamide
CBL1abc	Cob(1)alamin transport via ABC system	atp[c] + h2o[c] + cbl1[e] -> adp[c] + cbl1[c] + h[c] + pi[c]				Transport, Membrane	0	0	1000	0	1		To utilize extracellular cob(1)alamin
CDAabc	calcium-dependent antibiotics 2b transport via ABC system	atp[c] + h2o[c] + CDA[c] -> adp[c] + CDA[e] + h[c] + pi[c]	((SCO3223 and SCO3224) or SCO3235)	SCO3223 SCO3224 SCO3235		Transport, Membrane	0	0	1000	0	2
CELBabc	cellobiose transport via ABC system	atp[c] + h2o[c] + celb[e] -> adp[c] + celb[c] + h[c] + pi[c]	((SCO2796 and SCO2797 and SCO2795 and SCO4240) or (SCO7556 and SCO7557 and SCO7555 and SCO4240))	SCO2796 SCO2797 SCO2795 SCO4240 SCO7556 SCO7557 SCO7555 SCO4240	msiK	Transport, Membrane	0	0	1000	0	3			Saito A, Fujii T, Shinya T, Shibuya N, Ando A, Miyashita K.#2008#The msiK gene, encoding the ATP-hydrolysing component of N,N'-diacetylchitobiose ABC transporters, is essential for induction of chitinase production in Streptomyces coelicolor A3(2).#Microbiology.#154#3358-3365#
CHLabc	choline transport via ABC system	atp[c] + h2o[c] + chol[e] -> adp[c] + chol[c] + h[c] + pi[c]	((SCO2931 and SCO2930 and SCO2932 and SCO2933) or (SCO6062 and SCO6063 and SCO6064 and SCO6065))	SCO2931 SCO2930 SCO2932 SCO2933 SCO6062 SCO6063 SCO6064 SCO6065		Transport, Membrane	0	0	1000	0	2
CHLt2	choline transport via proton symport	chol[e] + h[e] -> chol[c] + h[c]	SCO6739	SCO6739		Transport, Membrane	0	0	1000	0	2
CHTBSabc	chitobiose transport via ABC system	atp[c] + h2o[c] + chtbs[e] -> adp[c] + chtbs[c] + h[c] + pi[c]	((SCO5232 and SCO5233 and SCO5234 and SCO4240) or (SCO6005 and SCO6006 and SCO6007 and SCO4240))	SCO5232 SCO5233 SCO5234 SCO4240 SCO6005 SCO6006 SCO6007 SCO4240	dasA dasB dasC msiK	Transport, Membrane	0	0	1000	0	3			Saito A, Shinya T, Miyamoto K, Yokoyama T, Kaku H, Minami E, Shibuya N, Tsujibo H, Nagata Y, Ando A, Fujii T, Miyashita K.#2007#The dasABC gene cluster, adjacent to dasR, encodes a novel ABC transporter for the uptake of N,N'-diacetylchitobiose in Streptomyces coelicolor A3(2).#Appl Environ Microbiol.#73#3000-3008#Saito A, Fujii T, Shinya T, Shibuya N, Ando A, Miyashita K.#2008##The msiK gene, en…
CITt3	citrate transport out via proton antiport	cit[c] + h[e] -> h[c] + cit[e]				Transport, Membrane	0	0	1000	0	1		Required to secrete citrate
CITt7	Citrate transport via succinate antiport	succ[c] + cit[e] -> cit[c] + succ[e]	SCO2144	SCO2144		Transport, Membrane	0	0	1000	0	2
CO2t	CO2 transporter via diffusion	co2[e] <=> co2[c]	s0001	s0001	SPONTANEOUS	Transport, Membrane	1	-1000	1000	0	1		Spontaneous reaction
CSNt2	cytosine transport in via proton symport	csn[e] + h[e] -> csn[c] + h[c]	SCO0572	SCO0572		Transport, Membrane	0	0	1000	0	2
CSNt2r	cytosine transport in via proton symport, reversible	csn[e] + h[e] <=> csn[c] + h[c]	(SCO5524 or SCO5579)	SCO5524 SCO5579		Transport, Membrane	1	-1000	1000	0	2
CYSabc	L-cysteine uptake via ABC system	atp[c] + h2o[c] + cys-L[e] -> adp[c] + cys-L[c] + h[c] + pi[c]	SCO3947	SCO3947	cydCD	Transport, Membrane	0	0	1000	0	2
CYSabc2	L-cysteine export via ABC system	atp[c] + cys-L[c] + h2o[c] -> adp[c] + h[c] + pi[c] + cys-L[e]	SCO3947	SCO3947	cydCD	Transport, Membrane	0	0	1000	0	2
CYSt	L-cysteine export via facilitated transport	cys-L[c] -> cys-L[e]	SCO2756	SCO2756		Transport, Membrane	0	0	1000	0	2
CYTDt2r	cytidine transport in via proton symport, reversible	cytd[e] + h[e] <=> cytd[c] + h[c]				Transport, Membrane	1	-1000	1000	0	1		To utilize extracellular nucleoside
DADNt2	deoxyadenosine transport in via proton symport	dad-2[e] + h[e] -> dad-2[c] + h[c]				Transport, Membrane	0	0	1000	0	1		To utilize extracellular nucleoside
DALAt2	D-alanine transport in via proton symport	ala-D[e] + h[e] -> ala-D[c] + h[c]	SCO2914	SCO2914		Transport, Membrane	0	0	1000	0	2
DAPabc	M-diaminopimelic acid ABC transport	atp[c] + h2o[c] + 26dap-M[e] -> 26dap-M[c] + adp[c] + h[c] + pi[c]				Transport, Membrane	0	0	1000	0	1		Required for growth using M-diaminopimelic acid as a carbon source
DCYTt2	deoxycytidine transport in via proton symport	dcyt[e] + h[e] -> dcyt[c] + h[c]				Transport, Membrane	0	0	1000	0	1		To utilize extracellular nucleoside
DDGLCNt2r	2-dehydro-3-deoxy-D-gluconate transport via proton symport, reversible	2ddglcn[e] + h[e] <=> 2ddglcn[c] + h[c]				Transport, Membrane	1	-1000	1000	0	1		To utilize 2-dehydro-3-deoxy-D-gluconate
DGSNt2	deoxyguanosine transport in via proton symport	dgsn[e] + h[e] -> dgsn[c] + h[c]				Transport, Membrane	0	0	1000	0	1		To utilize extracellular nucleoside
DHAt	Dihydroxyacetone transport via facilitated diffusion	dha[e] <=> dha[c]				Transport, Membrane	1	-1000	1000	0	1		Required for growth using dihydroxyacetone as a carbon source
DINSt2	deoxyinosine transport in via proton symport	din[e] + h[e] -> din[c] + h[c]				Transport, Membrane	0	0	1000	0	1		To utilize extracellular nucleoside
D-LACt2	D-lactate transport via proton symport	h[e] + lac-D[e] <=> h[c] + lac-D[c]	SCO3029	SCO3029		Transport, Membrane	1	-1000	1000	0	2
DRIBt	deoxyribose transport via diffusion	drib[e] <=> drib[c]				Transport, Membrane	1	-1000	1000	0	1		Required for growth using deoxyribose as a carbon source
DURIt2	deoxyuridine transport in via proton symport	duri[e] + h[e] -> duri[c] + h[c]				Transport, Membrane	0	0	1000	0	1		To utilize extracellular nucleoside
EPMt2	epimelibiose transport in via symport	h[e] + epm[e] -> h[c] + epm[c]				Transport, Membrane	0	0	1000	0	1		Required for growth using epimelibiose as a carbon source
ETHAt2	ethanolamine transport in via proton symport	etha[e] + h[e] -> etha[c] + h[c]				Transport, Membrane	0	0	1000	0	1		Required for growth using ethanolamine as a carbon source
ETOHtr	ethanol reversible transport via diffusion	etoh[e] <=> etoh[c]	s0001	s0001	SPONTANEOUS	Transport, Membrane	1	-1000	1000	0	1		Spontaneous reaction
FALDt	formaldehyde transport via diffusion	fald[e] <=> fald[c]	s0001	s0001	SPONTANEOUS	Transport, Membrane	1	-1000	1000	0	1		Spontaneous reaction
FORti	formate transport via diffusion	for[c] -> for[e]	s0001	s0001	SPONTANEOUS	Transport, Membrane	0	0	1000	0	1		Spontaneous reaction
FRUpts	D-fructose transport via PEP:Pyr PTS	pep[c] + fru[e] -> f1p[c] + pyr[c]	(SCO3196 and SCO1391 and SCO5841)	SCO3196 SCO1391 SCO5841	ptsI ptsH	Transport, Membrane	0	0	1000	0	3			Nothaft H, Dresel D, Willimek A, Mahr K, Niederweis M, Titgemeyer F.#2003#The phosphotransferase system of Streptomyces coelicolor is biased for N-acetylglucosamine metabolism.#J Bacteriol.#185#7019-7023##Nothaft H, Parche S, Kamionka A, Titgemeyer F.#2003#In vivo analysis of HPr reveals a fructose-specific phosphotransferase system that confers high-affinity uptake in Streptomyces coelicolor.#J …
FUMt2_2	Fumarate transport via proton symport (2 H)	fum[e] + 2 h[e] -> fum[c] + 2 h[c]	SCO5436	SCO5436		Transport, Membrane	0	0	1000	0	2
GALCTNt2	D-galactonate transport via proton symport	galctn-D[e] + h[e] -> galctn-D[c] + h[c]	SCO0313	SCO0313		Transport, Membrane	0	0	1000	0	2
GALIt2	1-alpha-D-Galactosyl-myo-inositol transport in via symport	h[e] + 1Dgali[e] -> h[c] + 1Dgali[c]				Transport, Membrane	0	0	1000	0	1		Required for growth using 1-alpha-D-Galactosyl-myo-inositol as a carbon source
GALt4	galactose transport via sodium symport	gal[e] + na1[e] -> gal[c] + na1[c]	SCO3139	SCO3139		Transport, Membrane	0	0	1000	0	2
GGLt2	galactosylglycerol transport in via symport	h[e] + ggl[e] -> h[c] + ggl[c]				Transport, Membrane	0	0	1000	0	1		Required for growth using galactosylglycerol as a carbon source
GLCNt2r	D-gluconate transport via proton symport, reversible	glcn[e] + h[e] <=> glcn[c] + h[c]	(SCO1680 or SCO4991)	SCO1680 SCO4991		Transport, Membrane	1	-1000	1000	0	2
GLCRt2r	D-glucarate transport via proton symport, reversible	glcr[e] + h[e] <=> glcr[c] + h[c]	SCO2541	SCO2541		Transport, Membrane	1	-1000	1000	0	2
GLCt2	D-glucose transport in via proton symport	glc-D[e] + h[e] -> glc-D[c] + h[c]	(SCO5578 or SCO7153)	SCO5578 SCO7153	glcP1 glcP2	Transport, Membrane	0	0	1000	0	4			van Wezel GP, Mahr K, König M, Traag BA, Pimentel-Schmitt EF, Willimek A, Titgemeyer F.#2005#GlcP constitutes the major glucose uptake system of Streptomyces coelicolor A3(2).#Mol Microbiol.#55#624-636#
GLNabc	L-glutamine transport via ABC system	atp[c] + h2o[c] + gln-L[e] -> adp[c] + gln-L[c] + h[c] + pi[c]	(SCO5258 and SCO5259 and SCO5260)	SCO5258 SCO5259 SCO5260	atrC atrB atrA	Transport, Membrane	0	0	1000	0	2
GLUabc	L-glutamate transport via ABC system	atp[c] + h2o[c] + glu-L[e] -> adp[c] + glu-L[c] + h[c] + pi[c]	(SCO5777 and SCO5774 and SCO5775 and SCO5776)	SCO5777 SCO5774 SCO5775 SCO5776	gluA gluD gluC gluB	Transport, Membrane	0	0	1000	0	2
GLUt2r	L-glutamate transport via proton symport, reversible	glu-L[e] + h[e] <=> glu-L[c] + h[c]	SCO4498	SCO4498		Transport, Membrane	1	-1000	1000	0	2
GLYALDt	Glyceraldehyde facilitated diffusion	glyald[e] <=> glyald[c]	(SCO1659 or SCO4057)	SCO1659 SCO4057	glpF	Transport, Membrane	1	-1000	1000	0	2
GLYBabc	Glycine betaine transport via ABC system	atp[c] + h2o[c] + glyb[e] -> adp[c] + glyb[c] + h[c] + pi[c]	((SCO2931 and SCO2930 and SCO2932 and SCO2933) or (SCO6062 and SCO6063 and SCO6064 and SCO6065))	SCO2931 SCO2930 SCO2932 SCO2933 SCO6062 SCO6063 SCO6064 SCO6065		Transport, Membrane	0	0	1000	0	2
GLYBt2	Glycine betaine transport via proton symport	glyb[e] + h[e] -> glyb[c] + h[c]	(SCO1225 or SCO2336 or SCO7395)	SCO1225 SCO2336 SCO7395		Transport, Membrane	0	0	1000	0	2
GLYCAt2r	D-glycerate transport via proton symport, reversible	glyc-R[e] + h[e] <=> glyc-R[c] + h[c]	SCO2541	SCO2541		Transport, Membrane	1	-1000	1000	0	2
GLYCLTt2i	glycolate transport via proton symport (irreversible)	glyclt[e] + h[e] -> glyclt[c] + h[c]	SCO3029	SCO3029		Transport, Membrane	0	0	1000	0	2
GLYCLTt4	glycolate transport via sodium symport	glyclt[e] + na1[e] -> glyclt[c] + na1[c]	SCO1822	SCO1822		Transport, Membrane	0	0	1000	0	2
GLYCt	glycerol transport via channel	glyc[c] <=> glyc[e]	(SCO1659 or SCO4057)	SCO1659 SCO4057	glpF	Transport, Membrane	1	-1000	1000	0	2
GLYt2r	glycine reversible transport via proton symport	gly[e] + h[e] <=> gly[c] + h[c]	SCO2914	SCO2914		Transport, Membrane	1	-1000	1000	0	2
GLYt4	glycine transport in via sodium symport	gly[e] + na1[e] -> gly[c] + na1[c]	SCO7197	SCO7197		Transport, Membrane	0	0	1000	0	2
GSNt2	guanosine transport in via proton symport	gsn[e] + h[e] -> gsn[c] + h[c]				Transport, Membrane	0	0	1000	0	1		To utilize extracellular nucleoside
GUAt	Guanine transport via diffusion	gua[e] <=> gua[c]				Transport, Membrane	1	-1000	1000	0	2
GUAt2	guanine transport in via proton symport	gua[e] + h[e] -> gua[c] + h[c]	(SCO6212 or SCO6214)	SCO6212 SCO6214		Transport, Membrane	0	0	1000	0	2
H2O2t	hydrogen peroxide transport via diffusion	h2o2[e] <=> h2o2[c]	s0001	s0001	SPONTANEOUS	Transport, Membrane	1	-1000	1000	0	1		Spontaneous reaction
H2Ot	H2O transport via diffusion	h2o[e] <=> h2o[c]	s0001	s0001	SPONTANEOUS	Transport, Membrane	1	-1000	1000	0	1		Spontaneous reaction
H2St1	h2s transport	h2s[e] <=> h2s[c]	s0001	s0001	SPONTANEOUS	Transport, Membrane	1	-1000	1000	0	1		Spontaneous reaction
HISt2r	L-histidine reversible transport via proton symport	h[e] + his-L[e] <=> h[c] + his-L[c]	SCO2914	SCO2914		Transport, Membrane	1	-1000	1000	0	2
HOMt2	L-homoserineserine efflux via proton symport	hom-L[c] + h[e] -> h[c] + hom-L[e]	(SCO4374 or SCO3362)	SCO4374 SCO3362		Transport, Membrane	0	0	1000	0	2
IDONt2r	L-idonate transport via proton symport, reversible	h[e] + idon-L[e] <=> h[c] + idon-L[c]	(SCO1680 or SCO4991)	SCO1680 SCO4991		Transport, Membrane	1	-1000	1000	0	2
ILEabc	L-isoleucine transport via ABC system	atp[c] + h2o[c] + ile-L[e] -> adp[c] + h[c] + ile-L[c] + pi[c]	((SCO0709 and SCO0710 and SCO0707 and SCO0708 and SCO0706) or (SCO2011 and SCO2012 and SCO2009 and SCO2010 and SCO2008) or (SCO7181 and SCO7182 and SCO7183 and SCO7184 and SCO7185))	SCO0709 SCO0710 SCO0707 SCO0708 SCO0706 SCO2011 SCO2012 SCO2009 SCO2010 SCO2008 SCO7181 SCO7182 SCO7183 SCO7184 SCO7185		Transport, Membrane	0	0	1000	0	2
INDOLEt2r	Indole transport via proton symport, reversible	h[e] + indole[e] <=> h[c] + indole[c]				Transport, Membrane	1	-1000	1000	0	1		Required for growth using L-tryptophan as a carbon source
INOSTt4	Na+/myo-inositol symporter	inost[e] + na1[e] -> inost[c] + na1[c]	SCO3139	SCO3139		Transport, Membrane	0	0	1000	0	2
INSt2r	inosine transport in via proton symport, reversible	h[e] + ins[e] <=> h[c] + ins[c]				Transport, Membrane	1	-1000	1000	0	1		To utilize extracellular nucleoside
LALADGLUt	L-alanyl-D-glutamate transport in via proton symport	LalaDglu[e] + h[e] -> LalaDglu[c] + h[c]	SCO3064	SCO3064		Transport, Membrane	0	0	1000	0	2
LCTSabc	Lactose transport via ABC system	atp[c] + h2o[c] + lcts[e] -> adp[c] + lcts[c] + h[c] + pi[c]	(SCO7409 and SCO7410 and SCO7408)	SCO7409 SCO7410 SCO7408		Transport, Membrane	0	0	1000	0	2
LEUabc	L-leucine transport via ABC system	atp[c] + h2o[c] + leu-L[e] -> adp[c] + h[c] + leu-L[c] + pi[c]	((SCO0709 and SCO0710 and SCO0707 and SCO0708 and SCO0706) or (SCO2011 and SCO2012 and SCO2009 and SCO2010 and SCO2008) or (SCO7181 and SCO7182 and SCO7183 and SCO7184 and SCO7185))	SCO0709 SCO0710 SCO0707 SCO0708 SCO0706 SCO2011 SCO2012 SCO2009 SCO2010 SCO2008 SCO7181 SCO7182 SCO7183 SCO7184 SCO7185		Transport, Membrane	0	0	1000	0	2
LIPOt2	Lipoate transport via proton symport	h[e] + lipoate[e] -> h[c] + lipoate[c]				Transport, Membrane	0	0	1000	0	1		To utilize extracellular lipoate
L-LACt2r	L-lactate reversible transport via proton symport	h[e] + lac-L[e] <=> h[c] + lac-L[c]	SCO3029	SCO3029		Transport, Membrane	1	-1000	1000	0	2
LYSabc	L-lysine transport via ABC system	atp[c] + h2o[c] + lys-L[e] -> adp[c] + h[c] + lys-L[c] + pi[c]	(SCO2831 and SCO2829 and SCO2830 and SCO2828)	SCO2831 SCO2829 SCO2830 SCO2828		Transport, Membrane	0	0	1000	0	2
LYSt2	L-lysine transport in via proton symport	h[e] + lys-L[e] -> h[c] + lys-L[c]	SCO2914	SCO2914		Transport, Membrane	0	0	1000	0	2
LYSt3	L-lysine transport out via proton antiport	lys-L[c] + h[e] -> h[c] + lys-L[e]	SCO7308	SCO7308		Transport, Membrane	0	0	1000	0	2
LYXt2	L-Lyxose transport via proton symport	h[e] + lyx-L[e] -> h[c] + lyx-L[c]				Transport, Membrane	0	0	1000	0	1		Required for growth using L-lyxose as a carbon source	$Streptomyces lividans#Madduri K, Stuttard C, Vining LC.#1989#Lysine catabolism in Streptomyces spp. is primarily through cadaverine: beta-lactam producers also make alpha-aminoadipate.#J Bacteriol.#171#299-302#
MALt2_2	Malate transport via proton symport (2 H)	2 h[e] + mal-L[e] -> 2 h[c] + mal-L[c]	SCO5436	SCO5436		Transport, Membrane	0	0	1000	0	2
MALt3	L-malate transport out via proton antiport	mal-L[c] + h[e] -> h[c] + mal-L[e]				Transport, Membrane	0	0	1000	0	1		Required to secrete L-malate
MALTabc	maltose transport via ABC system	atp[c] + h2o[c] + malt[e] -> adp[c] + h[c] + malt[c] + pi[c]	(SCO2229 and SCO2230 and SCO2231 and SCO4240)	SCO2229 SCO2230 SCO2231 SCO4240	malG malF malE msiK	Transport, Membrane	0	0	1000	0	3			Saito A, Fujii T, Shinya T, Shibuya N, Ando A, Miyashita K.#2008#The msiK gene, encoding the ATP-hydrolysing component of N,N'-diacetylchitobiose ABC transporters, is essential for induction of chitinase production in Streptomyces coelicolor A3(2).#Microbiology.#154#3358-3365#
MALTHXabc	maltohexaose transport via ABC system	atp[c] + h2o[c] + malthx[e] -> adp[c] + h[c] + malthx[c] + pi[c]	(SCO2229 and SCO2230 and SCO2231 and SCO4240)	SCO2229 SCO2230 SCO2231 SCO4240	malG malF malE msiK	Transport, Membrane	0	0	1000	0	3			Saito A, Fujii T, Shinya T, Shibuya N, Ando A, Miyashita K.#2008#The msiK gene, encoding the ATP-hydrolysing component of N,N'-diacetylchitobiose ABC transporters, is essential for induction of chitinase production in Streptomyces coelicolor A3(2).#Microbiology.#154#3358-3365#
MALTPTabc	maltopentaose transport via ABC system	atp[c] + h2o[c] + maltpt[e] -> adp[c] + h[c] + maltpt[c] + pi[c]	(SCO2229 and SCO2230 and SCO2231 and SCO4240)	SCO2229 SCO2230 SCO2231 SCO4240	malG malF malE msiK	Transport, Membrane	0	0	1000	0	3			Saito A, Fujii T, Shinya T, Shibuya N, Ando A, Miyashita K.#2008#The msiK gene, encoding the ATP-hydrolysing component of N,N'-diacetylchitobiose ABC transporters, is essential for induction of chitinase production in Streptomyces coelicolor A3(2).#Microbiology.#154#3358-3365#
MALTTRabc	Maltotriose transport via ABC system	atp[c] + h2o[c] + malttr[e] -> adp[c] + h[c] + malttr[c] + pi[c]	(SCO2229 and SCO2230 and SCO2231 and SCO4240)	SCO2229 SCO2230 SCO2231 SCO4240	malG malF malE msiK	Transport, Membrane	0	0	1000	0	3			Saito A, Fujii T, Shinya T, Shibuya N, Ando A, Miyashita K.#2008#The msiK gene, encoding the ATP-hydrolysing component of N,N'-diacetylchitobiose ABC transporters, is essential for induction of chitinase production in Streptomyces coelicolor A3(2).#Microbiology.#154#3358-3365#
MALTTTRabc	maltotetraose transport via ABC system	atp[c] + h2o[c] + maltttr[e] -> adp[c] + h[c] + maltttr[c] + pi[c]	(SCO2229 and SCO2230 and SCO2231 and SCO4240)	SCO2229 SCO2230 SCO2231 SCO4240	malG malF malE msiK	Transport, Membrane	0	0	1000	0	3			Saito A, Fujii T, Shinya T, Shibuya N, Ando A, Miyashita K.#2008#The msiK gene, encoding the ATP-hydrolysing component of N,N'-diacetylchitobiose ABC transporters, is essential for induction of chitinase production in Streptomyces coelicolor A3(2).#Microbiology.#154#3358-3365#
MANt2	D-mannose transport in via proton symport	man[e] + h[e] -> h[c] + man[c]				Transport, Membrane	0	0	1000	0	1		Required for growth using D-mannose as a carbon source
MELIBt2	melibiose transport in via symport	h[e] + melib[e] -> h[c] + melib[c]				Transport, Membrane	0	0	1000	0	1		Required for growth using melibiose as a carbon source
MELTt2	melibiitol transport in via symport	h[e] + melt[e] -> h[c] + melt[c]				Transport, Membrane	0	0	1000	0	1		Required for growth using melibiitol as a carbon source
MEOHtr	Methanol reversible transport via diffusion	meoh[e] <=> meoh[c]	s0001	s0001	SPONTANEOUS	Transport, Membrane	1	-1000	1000	0	1		Spontaneous reaction
METabc	L-methionine transport via ABC system	atp[c] + h2o[c] + met-L[e] -> adp[c] + h[c] + met-L[c] + pi[c]	(SCO1559 and SCO1558 and SCO1557)	SCO1559 SCO1558 SCO1557		Transport, Membrane	0	0	1000	0	2
MNLabc	mannitol transport via ABC system	atp[c] + h2o[c] + mnl[e] -> adp[c] + h[c] + pi[c] + mnl[c]	(SCO1899 and SCO1900 and SCO1898 and SCO4240)	SCO1899 SCO1900 SCO1898 SCO4240	msiK	Transport, Membrane	0	0	1000	0	2
MNt2	manganese (Mn+2) transport in via proton symport	h[e] + mn2[e] -> h[c] + mn2[c]	SCO4993	SCO4993		Transport, Membrane	0	0	1000	0	2
N2Ot	nitrious oxide transport via diffusion	n2o[e] <=> n2o[c]	s0001	s0001	SPONTANEOUS	Transport, Membrane	1	-1000	1000	0	1		Spontaneous reaction
NACt	Nicotinic acid uptake	nac[e] -> nac[c]				Transport, Membrane	0	0	1000	0	1		To utilize extracellular nicotinic acid
NMNPt	NMN permease	nmn[e] -> nmn[c]	SCO1442	SCO1442		Transport, Membrane	0	0	1000	0	2
ORNabc	ornithine transport via ABC system	atp[c] + h2o[c] + orn[e] -> adp[c] + h[c] + orn[c] + pi[c]	(SCO2831 and SCO2829 and SCO2830 and SCO2828)	SCO2831 SCO2829 SCO2830 SCO2828		Transport, Membrane	0	0	1000	0	2
OROTt2_2	Orotate transport via proton symport (2 H)	2 h[e] + orot[e] -> 2 h[c] + orot[c]	SCO5436	SCO5436		Transport, Membrane	0	0	1000	0	2
PACALDt2r	phenylacetaldehyde reversible transport via proton symport	h[e] + pacald[e] <=> h[c] + pacald[c]				Transport, Membrane	1	-1000	1000	0	1		Required for growth using L-phenylalanine as a nitrogen source	$Streptomyces lividans#Madduri K, Stuttard C, Vining LC.#1989#Lysine catabolism in Streptomyces spp. is primarily through cadaverine: beta-lactam producers also make alpha-aminoadipate.#J Bacteriol.#171#299-302#
PHEt2r	L-phenylalanine reversible transport via proton symport	h[e] + phe-L[e] <=> h[c] + phe-L[c]	SCO2914	SCO2914		Transport, Membrane	1	-1000	1000	0	2
PNTOt4	Pantothenate sodium symporter	na1[e] + pnto-R[e] -> na1[c] + pnto-R[c]	SCO5229	SCO5229		Transport, Membrane	0	0	1000	0	2
PPAt4	Na+/Propionate symporter	na1[e] + ppa[e] -> na1[c] + ppa[c]	SCO5229	SCO5229		Transport, Membrane	0	0	1000	0	2
PROabc	L-proline transport via ABC system	atp[c] + h2o[c] + pro-L[e] -> adp[c] + h[c] + pi[c] + pro-L[c]	((SCO4830 and SCO4831 and SCO4832) or (SCO1621 and SCO1620))	SCO4830 SCO4831 SCO4832 SCO1621 SCO1620	opuAA opuABC	Transport, Membrane	0	0	1000	0	2
PROt2r	L-proline reversible transport via proton symport	h[e] + pro-L[e] <=> h[c] + pro-L[c]	(SCO1225 or SCO2336 or SCO7395)	SCO1225 SCO2336 SCO7395		Transport, Membrane	1	-1000	1000	0	2
PROt4	Na+/Proline-L symporter	na1[e] + pro-L[e] -> na1[c] + pro-L[c]	SCO5229	SCO5229		Transport, Membrane	0	0	1000	0	2
PTRCabc	putrescine transport via ABC system	atp[c] + h2o[c] + ptrc[e] -> adp[c] + h[c] + pi[c] + ptrc[c]	(SCO5668 and SCO5669 and SCO5670 and SCO5658 and SCO5667)	SCO5668 SCO5669 SCO5670 SCO5658 SCO5667		Transport, Membrane	0	0	1000	0	2
PTRCt2	putrescine transport in via proton symport	h[e] + ptrc[e] -> h[c] + ptrc[c]	SCO5057	SCO5057		Transport, Membrane	0	0	1000	0	2
PYDAMt	pyridoxamine import	pydam[e] -> pydam[c]				Transport, Membrane	0	0	1000	0	1		To utilize extracellular pyridoxamine
PYDXNt	pyridoxine import	pydxn[e] -> pydxn[c]				Transport, Membrane	0	0	1000	0	1		To utilize extracellular pyridoxine
PYDXt	pyridoxal import	pydx[e] -> pydx[c]				Transport, Membrane	0	0	1000	0	1		To utilize extracellular pyridoxal
PYRt2r	pyruvate reversible transport via proton symport	h[e] + pyr[e] <=> h[c] + pyr[c]				Transport, Membrane	1	-1000	1000	0	1		Required for growth using pyruvate as a carbon source
RAFt2	raffinose transport in via symport	h[e] + raffin[e] -> h[c] + raffin[c]				Transport, Membrane	0	0	1000	0	1		Required for growth using raffinose as a carbon source
RIBabc	D-ribose transport via ABC system	atp[c] + h2o[c] + rib-D[e] -> adp[c] + h[c] + pi[c] + rib-D[c]	((SCO2746 and SCO2747 and SCO2749) or (SCO6259 and SCO6258 and SCO6257))	SCO2746 SCO2747 SCO2749 SCO6259 SCO6258 SCO6257		Transport, Membrane	0	0	1000	0	2
RMNabc	L-rhamnose transport via ABC system	atp[c] + h2o[c] + rmn[e] -> adp[c] + h[c] + pi[c] + rmn[c]	(SCO0809 and SCO0810 and SCO0808 and SCO0811)	SCO0809 SCO0810 SCO0808 SCO0811		Transport, Membrane	0	0	1000	0	2
SALCpts	salicin transport via PEP:Pyr PTS	pep[c] + salcn[e] -> pyr[c] + salc6p[c]				Transport, Membrane	0	0	1000	0	1		Required for growth using salicin as a carbon source
SBTabc	D-sorbitol transport via ABC system	atp[c] + h2o[c] + sbt-D[e] -> adp[c] + h[c] + pi[c] + sbt-D[c]	(SCO1899 and SCO1900 and SCO1898 and SCO4240)	SCO1899 SCO1900 SCO1898 SCO4240	msiK	Transport, Membrane	0	0	1000	0	2
SERt2r	L-serine reversible transport via proton symport	h[e] + ser-L[e] <=> h[c] + ser-L[c]				Transport, Membrane	1	-1000	1000	0	1		Required for growth using L-serine as a carbon source
SKMt2	shikimate transport in via proton symport	h[e] + skm[e] -> h[c] + skm[c]	SCO1010	SCO1010		Transport, Membrane	0	0	1000	0	2
SPMDabc	spermidine transport via ABC system	atp[c] + h2o[c] + spmd[e] -> adp[c] + h[c] + pi[c] + spmd[c]	(SCO5668 and SCO5669 and SCO5670 and SCO5658 and SCO5667)	SCO5668 SCO5669 SCO5670 SCO5658 SCO5667		Transport, Membrane	0	0	1000	0	2
SPMDt3	spermidine transport out via proton antiport	spmd[c] + h[e] -> h[c] + spmd[e]	SCO1918	SCO1918		Transport, Membrane	0	0	1000	0	2
SUCCt2_2	succinate transport via proton symport (2 H)	2 h[e] + succ[e] -> 2 h[c] + succ[c]	SCO5436	SCO5436		Transport, Membrane	0	0	1000	0	2
TARTt2_3	D-tartrate transport via proton symport (3 H)	3 h[e] + tartr-D[e] -> 3 h[c] + tartr-D[c]				Transport, Membrane	0	0	1000	0	1		Required for growth using D-tartrate as a carbon source
TAURabc	taurine transport via ABC system	atp[c] + h2o[c] + taur[e] -> adp[c] + h[c] + pi[c] + taur[c]	(SCO7544 and SCO7545 and SCO7546)	SCO7544 SCO7545 SCO7546		Transport, Membrane	0	0	1000	0	2
THMabc	thiamine transport via ABC system	atp[c] + h2o[c] + thm[e] -> adp[c] + h[c] + pi[c] + thm[c]	(SCO5648 and SCO5647 and SCO5646)	SCO5648 SCO5647 SCO5646		Transport, Membrane	0	0	1000	0	2
THMDt2r	thymidine transport in via proton symport, reversible	h[e] + thymd[e] <=> h[c] + thymd[c]				Transport, Membrane	1	-1000	1000	0	1		To utilize extracellular nucleoside
THRabc	L-threonine transport via ABC system	atp[c] + h2o[c] + thr-L[e] -> adp[c] + h[c] + pi[c] + thr-L[c]	((SCO0709 and SCO0710 and SCO0707 and SCO0708 and SCO0706) or (SCO2011 and SCO2012 and SCO2009 and SCO2010 and SCO2008) or (SCO7181 and SCO7182 and SCO7183 and SCO7184 and SCO7185))	SCO0709 SCO0710 SCO0707 SCO0708 SCO0706 SCO2011 SCO2012 SCO2009 SCO2010 SCO2008 SCO7181 SCO7182 SCO7183 SCO7184 SCO7185		Transport, Membrane	0	0	1000	0	2
THRt2	L-threonine efflux transport via proton antiport	thr-L[c] + h[e] -> h[c] + thr-L[e]	(SCO4374 or SCO3362)	SCO4374 SCO3362		Transport, Membrane	0	0	1000	0	2
THYMt3r	thymine transport out via proton antiport, reversible	thym[c] + h[e] <=> h[c] + thym[e]				Transport, Membrane	1	-1000	1000	0	1		To utilize extracellular nucleobase
TREabc	trehalose transport via ABC system	atp[c] + h2o[c] + tre[e] -> adp[c] + h[c] + pi[c] + tre[c]	((SCO1886 and SCO1887 and SCO1882) or (SCO6602 and SCO6603 and SCO6601))	SCO1886 SCO1887 SCO1882 SCO6602 SCO6603 SCO6601		Transport, Membrane	0	0	1000	0	2
TRPt2r	L-tryptophan reversible transport via proton symport	h[e] + trp-L[e] <=> h[c] + trp-L[c]	SCO2914	SCO2914		Transport, Membrane	1	-1000	1000	0	2
TYRt2r	L-tyrosine reversible transport via proton symport	h[e] + tyr-L[e] <=> h[c] + tyr-L[c]	SCO2914	SCO2914		Transport, Membrane	1	-1000	1000	0	2
URAt2r	uracil transport in via proton symport, reversible	h[e] + ura[e] <=> h[c] + ura[c]	SCO1450	SCO1450		Transport, Membrane	1	-1000	1000	0	2
UREAt	Urea transport via facilitate diffusion	urea[e] <=> urea[c]	(SCO1659 or SCO4057)	SCO1659 SCO4057	glpF	Transport, Membrane	1	-1000	1000	0	2
URIt2r	uridine transport in via proton symport, reversible	h[e] + uri[e] <=> h[c] + uri[c]				Transport, Membrane	1	-1000	1000	0	1		To utilize extracellular nucleoside
VALabc	L-valine transport via ABC system	atp[c] + h2o[c] + val-L[e] -> adp[c] + h[c] + pi[c] + val-L[c]	((SCO0709 and SCO0710 and SCO0707 and SCO0708 and SCO0706) or (SCO2011 and SCO2012 and SCO2009 and SCO2010 and SCO2008) or (SCO7181 and SCO7182 and SCO7183 and SCO7184 and SCO7185))	SCO0709 SCO0710 SCO0707 SCO0708 SCO0706 SCO2011 SCO2012 SCO2009 SCO2010 SCO2008 SCO7181 SCO7182 SCO7183 SCO7184 SCO7185		Transport, Membrane	0	0	1000	0	2
VANK	Vanillate/proton symport transport	h[e] + vanlt[e] <=> h[c] + vanlt[c]				Transport, Membrane	1	-1000	1000	0	1		Required for growth using vanillate as a carbon source
XANt2	xanthine transport in via proton symport	h[e] + xan[e] -> h[c] + xan[c]	(SCO6212 or SCO6214)	SCO6212 SCO6214		Transport, Membrane	0	0	1000	0	2
XTSNt2r	Xanthosine transport via proton symport	h[e] + xtsn[e] <=> h[c] + xtsn[c]				Transport, Membrane	1	-1000	1000	0	1		To utilize extracellular nucleoside
XYLabc	D-xylose transport via ABC system	atp[c] + h2o[c] + xyl-D[e] -> adp[c] + h[c] + pi[c] + xyl-D[c]	(SCO6010 and SCO6011 and SCO6009)	SCO6010 SCO6011 SCO6009		Transport, Membrane	0	0	1000	0	2
XYLTabc	xylitol transport via ABC system	atp[c] + h2o[c] + xylt[e] -> adp[c] + h[c] + pi[c] + xylt[c]	(SCO1899 and SCO1900 and SCO1898 and SCO4240)	SCO1899 SCO1900 SCO1898 SCO4240	msiK	Transport, Membrane	0	0	1000	0	2
ALATRS	Alanyl-tRNA synthetase	ala-L[c] + atp[c] + trnaala[c] -> alatrna[c] + amp[c] + ppi[c]	SCO1501	SCO1501	alaS	tRNA Charging	0	0	1000	0	2	6.1.1.7
ARGTRS	Arginyl-tRNA synthetase	arg-L[c] + atp[c] + trnaarg[c] -> amp[c] + argtrna[c] + ppi[c]	(SCO3304 or SCO5352)	SCO3304 SCO5352	argS	tRNA Charging	0	0	1000	0	2	6.1.1.19
ASNTRS	Asparaginyl-tRNA synthetase	asn-L[c] + atp[c] + trnaasn[c] -> amp[c] + asntrna[c] + ppi[c]				tRNA Charging	0	0	1000	0	1	6.1.1.22	tRNA system
ASPTRS	Aspartyl-tRNA synthetase	asp-L[c] + atp[c] + trnaasp[c] -> amp[c] + asptrna[c] + ppi[c]	SCO3795	SCO3795	aspS	tRNA Charging	0	0	1000	0	2	6.1.1.12
CYSTRS	Cysteinyl-tRNA synthetase	atp[c] + cys-L[c] + trnacys[c] -> amp[c] + cystrna[c] + ppi[c]	SCO4235	SCO4235	cysS	tRNA Charging	0	0	1000	0	2	6.1.1.16
FMETTRS	Methionyl-tRNA formyltransferase	10fthf[c] + mettrna[c] -> fmettrna[c] + h[c] + thf[c]	SCO1473	SCO1473	fmt	tRNA Charging	0	0	1000	0	2	2.1.2.9
GLNTRS	Glutaminyl-tRNA synthetase	atp[c] + gln-L[c] + trnagln[c] -> amp[c] + glntrna[c] + ppi[c]				tRNA Charging	0	0	1000	0	1	6.1.1.18	tRNA system
GLYTRS	Glycyl-tRNA synthetase	atp[c] + gly[c] + trnagly[c] -> amp[c] + glytrna[c] + ppi[c]	SCO2504	SCO2504	glyS	tRNA Charging	0	0	1000	0	2	6.1.1.14
HISTRS	Histidyl-tRNA synthetase	atp[c] + his-L[c] + trnahis[c] -> amp[c] + histrna[c] + ppi[c]	SCO1508	SCO1508	hisS	tRNA Charging	0	0	1000	0	2	6.1.1.21
ILETRS	Isoleucyl-tRNA synthetase	atp[c] + ile-L[c] + trnaile[c] -> amp[c] + iletrna[c] + ppi[c]	SCO2076	SCO2076	ileS	tRNA Charging	0	0	1000	0	2	6.1.1.5
LEUTRS	Leucyl-tRNA synthetase	atp[c] + leu-L[c] + trnaleu[c] -> amp[c] + leutrna[c] + ppi[c]	SCO2571	SCO2571	leuS	tRNA Charging	0	0	1000	0	2	6.1.1.4
LYSTRS	Lysyl-tRNA synthetase	atp[c] + lys-L[c] + trnalys[c] -> amp[c] + lystrna[c] + ppi[c]	(SCO3303 or SCO3397 or SCO6384)	SCO3303 SCO3397 SCO6384	lysK	tRNA Charging	0	0	1000	0	2	6.1.1.6
METTRS	Methionyl-tRNA synthetase	atp[c] + met-L[c] + trnamet[c] -> amp[c] + mettrna[c] + ppi[c]	(SCO3792 or SCO6436)	SCO3792 SCO6436		tRNA Charging	0	0	1000	0	2	6.1.1.10
PHETRS	Phenylalanyl-tRNA synthetase	atp[c] + phe-L[c] + trnaphe[c] -> amp[c] + phetrna[c] + ppi[c]	(SCO1594 and SCO1595)	SCO1594 SCO1595	pheT pheS	tRNA Charging	0	0	1000	0	2	6.1.1.20
PROTRS	Prolyl-tRNA synthetase	atp[c] + pro-L[c] + trnapro[c] -> amp[c] + ppi[c] + protrna[c]	SCO5699	SCO5699	proS	tRNA Charging	0	0	1000	0	2	6.1.1.15
SERTRS	Seryl-tRNA synthetase	atp[c] + ser-L[c] + trnaser[c] -> amp[c] + ppi[c] + sertrna[c]	SCO3961	SCO3961	serS	tRNA Charging	0	0	1000	0	2	6.1.1.11
THRTRS	Threonyl-tRNA synthetase	atp[c] + thr-L[c] + trnathr[c] -> amp[c] + ppi[c] + thrtrna[c]	(SCO1531 or SCO3778)	SCO1531 SCO3778	thrS	tRNA Charging	0	0	1000	0	2	6.1.1.3
TRPTRS	Tryptophanyl-tRNA synthetase	atp[c] + trnatrp[c] + trp-L[c] -> amp[c] + ppi[c] + trptrna[c]	(SCO3334 or SCO4839)	SCO3334 SCO4839	trpS trpS2	tRNA Charging	0	0	1000	0	4	6.1.1.2		Kitabatake M, Ali K, Demain A, Sakamoto K, Yokoyama S, Söll D.#2002#Indolmycin resistance of Streptomyces coelicolor A3(2) by induced expression of one of its two tryptophanyl-tRNA synthetases.#J Biol Chem.#277#23882-23887#
TYRTRS	tyrosyl-tRNA synthetase	atp[c] + trnatyr[c] + tyr-L[c] -> amp[c] + ppi[c] + tyrtrna[c]	SCO1818	SCO1818	tyrS	tRNA Charging	0	0	1000	0	2	6.1.1.1
VALTRS	Valyl-tRNA synthetase	atp[c] + trnaval[c] + val-L[c] -> amp[c] + ppi[c] + valtrna[c]	SCO2615	SCO2615	valS	tRNA Charging	0	0	1000	0	2	6.1.1.9
34HPPOR	4-Hydroxyphenylpyruvate:oxygen oxidoreductase	34hpp[c] + o2[c] -> co2[c] + hgentis[c]	SCO2927	SCO2927		Tyrosine, Tryptophan, and Phenylalanine Metabolism	0	0	1000	0	2	1.13.11.27
ANPRT	anthranilate phosphoribosyltransferase	anth[c] + prpp[c] -> ppi[c] + pran[c]	(SCO2147 or SCO3212)	SCO2147 SCO3212	trpD1 trpD2	Tyrosine, Tryptophan, and Phenylalanine Metabolism	0	0	1000	0	2	2.4.2.18
ANS	anthranilate synthase	chor[c] + gln-L[c] -> anth[c] + glu-L[c] + h[c] + pyr[c]	((SCO3213 and SCO3214) or SCO2043 or SCO2117)	SCO3213 SCO3214 SCO2043 SCO2117	trpG trpE2 trpE3	Tyrosine, Tryptophan, and Phenylalanine Metabolism	0	0	1000	0	2	4.1.3.27
CHORM	chorismate mutase	chor[c] -> pphn[c]	(SCO2019 or SCO1762)	SCO2019 SCO1762		Tyrosine, Tryptophan, and Phenylalanine Metabolism	0	0	1000	0	2	5.4.99.5
CHORS	chorismate synthase	3psme[c] -> chor[c] + pi[c]	SCO1496	SCO1496	aroF	Tyrosine, Tryptophan, and Phenylalanine Metabolism	0	0	1000	0	2	4.2.3.5
DDPA	3-deoxy-D-arabino-heptulosonate 7-phosphate synthetase	e4p[c] + h2o[c] + pep[c] -> 2dda7p[c] + pi[c]	(SCO2115 or SCO3210)	SCO2115 SCO3210	aroH	Tyrosine, Tryptophan, and Phenylalanine Metabolism	0	0	1000	0	2	4.1.2.15
DHQS	3-dehydroquinate synthase	2dda7p[c] -> 3dhq[c] + pi[c]	SCO1494	SCO1494	aroB	Tyrosine, Tryptophan, and Phenylalanine Metabolism	0	0	1000	0	2	4.2.3.4
DHQTi	3-dehydroquinate dehydratase, irreversible	3dhq[c] -> 3dhsk[c] + h2o[c]	SCO1961	SCO1961	aroQ	Tyrosine, Tryptophan, and Phenylalanine Metabolism	0	0	1000	0	2	4.2.1.10		White PJ, Young J, Hunter IS, Nimmo HG, Coggins JR.#1990#The purification and characterization of 3-dehydroquinase from Streptomyces coelicolor.#Biochem J.#265#735-738#
FANH	N-Formylanthranilate amidohydrolase	nformanth[c] + h2o[c] -> anth[c] + for[c] + h[c]	SCO3644	SCO3644	kynB	Tyrosine, Tryptophan, and Phenylalanine Metabolism	0	0	1000	0	4	3.5.1.9		Zummo FP, Marineo S, Pace A, Civiletti F, Giardina A, Puglia AM.#2012#Tryptophan catabolism via kynurenine production in Streptomyces coelicolor: identification of three genes coding for the enzymes of tryptophan to anthranilate pathway.#Appl Microbiol Biotechnol.#94#719-728#
FKYNH	N-Formyl-L-kynurenine amidohydrolase	Lfmkynr[c] + h2o[c] -> Lkynr[c] + for[c] + h[c]	SCO3644	SCO3644	kynB	Tyrosine, Tryptophan, and Phenylalanine Metabolism	0	0	1000	0	4	3.5.1.9		Zummo FP, Marineo S, Pace A, Civiletti F, Giardina A, Puglia AM.#2012#Tryptophan catabolism via kynurenine production in Streptomyces coelicolor: identification of three genes coding for the enzymes of tryptophan to anthranilate pathway.#Appl Microbiol Biotechnol.#94#719-728#
FUMAC	fumarylacetoacetase	4fumacac[c] + h2o[c] -> acac[c] + fum[c] + h[c]	SCO4580	SCO4580		Tyrosine, Tryptophan, and Phenylalanine Metabolism	0	0	1000	0	2	3.7.1.2
HGNTOR	Homogentisate:oxygen 1,2-oxidoreductase (decyclizing)	hgentis[c] + o2[c] -> 4mlacac[c] + h[c]	SCO1715	SCO1715	hgd	Tyrosine, Tryptophan, and Phenylalanine Metabolism	0	0	1000	0	2	1.13.11.5
HKYNH	3-Hydroxy-L-kynurenine hydrolase	h2o[c] + hLkynr[c] -> 3hanthrn[c] + ala-L[c]	SCO3645	SCO3645	kynU	Tyrosine, Tryptophan, and Phenylalanine Metabolism	0	0	1000	0	4	3.7.1.3		Zummo FP, Marineo S, Pace A, Civiletti F, Giardina A, Puglia AM.#2012#Tryptophan catabolism via kynurenine production in Streptomyces coelicolor: identification of three genes coding for the enzymes of tryptophan to anthranilate pathway.#Appl Microbiol Biotechnol.#94#719-728#
IGPS	indole-3-glycerol-phosphate synthase	2cpr5p[c] + h[c] -> 3ig3p[c] + co2[c] + h2o[c]	(SCO2039 or SCO3211)	SCO2039 SCO3211	trpC1 trpC2	Tyrosine, Tryptophan, and Phenylalanine Metabolism	0	0	1000	0	2	4.1.1.48
KYN	kynureninase	Lkynr[c] + h2o[c] -> ala-L[c] + anth[c] + h[c]	SCO3645	SCO3645	kynU	Tyrosine, Tryptophan, and Phenylalanine Metabolism	0	0	1000	0	4	3.7.1.3		Zummo FP, Marineo S, Pace A, Civiletti F, Giardina A, Puglia AM.#2012#Tryptophan catabolism via kynurenine production in Streptomyces coelicolor: identification of three genes coding for the enzymes of tryptophan to anthranilate pathway.#Appl Microbiol Biotechnol.#94#719-728#
LFORKYNHYD	L-Formylkynurenine hydrolase	Lfmkynr[c] + h2o[c] -> ala-L[c] + h[c] + nformanth[c]	SCO3645	SCO3645	kynU	Tyrosine, Tryptophan, and Phenylalanine Metabolism	0	0	1000	0	4	3.7.1.3		Zummo FP, Marineo S, Pace A, Civiletti F, Giardina A, Puglia AM.#2012#Tryptophan catabolism via kynurenine production in Streptomyces coelicolor: identification of three genes coding for the enzymes of tryptophan to anthranilate pathway.#Appl Microbiol Biotechnol.#94#719-728#
MACACI	maleylacetoacetate isomerase	4mlacac[c] -> 4fumacac[c]				Tyrosine, Tryptophan, and Phenylalanine Metabolism	0	0	1000	0	1	5.2.1.2	Required for growth using L-tyrosine as a carbon source
PEAMNO	Phenethylamine oxidase	h2o[c] + o2[c] + peamn[c] -> h2o2[c] + nh4[c] + pacald[c]				Tyrosine, Tryptophan, and Phenylalanine Metabolism	0	0	1000	0	1	1.4.3.6	Required for growth using L-phenylalanine as a nitrogen source
PHETA1	phenylalanine transaminase	akg[c] + phe-L[c] <=> glu-L[c] + phpyr[c]	(SCO1859 or SCO2053 or SCO3944 or SCO4645 or SCO3658)	SCO1859 SCO2053 SCO3944 SCO4645 SCO3658	hisC1 hisC2 aspC	Tyrosine, Tryptophan, and Phenylalanine Metabolism	1	-1000	1000	0	2	2.6.1.58
PHYCBOXL	L-Phenylalanine carboxy-lyase	h[c] + phe-L[c] -> co2[c] + peamn[c]				Tyrosine, Tryptophan, and Phenylalanine Metabolism	0	0	1000	0	1	4.1.1.28	Required for growth using L-phenylalanine as a nitrogen source
PPND	prephenate dehydrogenase	nad[c] + pphn[c] -> 34hpp[c] + co2[c] + nadh[c]	(SCO1761 or SCO3221)	SCO1761 SCO3221		Tyrosine, Tryptophan, and Phenylalanine Metabolism	0	0	1000	0	2	1.3.1.12
PPNDH	prephenate dehydratase	h[c] + pphn[c] -> co2[c] + h2o[c] + phpyr[c]	SCO3962	SCO3962	pheA	Tyrosine, Tryptophan, and Phenylalanine Metabolism	0	0	1000	0	2	4.2.1.51
PRAIi	phosphoribosylanthranilate isomerase (irreversible)	pran[c] -> 2cpr5p[c]	SCO2050	SCO2050	priA	Tyrosine, Tryptophan, and Phenylalanine Metabolism	0	0	1000	0	4	5.3.1.24		Noda-García L, Camacho-Zarco AR, Verdel-Aranda K, Wright H, Soberón X, Fülöp V, Barona-Gómez F.#2010#Identification and analysis of residues contained on beta --> alpha loops of the dual-substrate (beta alpha)8 phosphoribosyl isomerase A specific for its phosphoribosyl anthranilate isomerase activity.#Protein Sci.#19#535-543#
PSCVT	3-phosphoshikimate 1-carboxyvinyltransferase	pep[c] + skm5p[c] <=> 3psme[c] + pi[c]	(SCO5212 or SCO6819)	SCO5212 SCO6819	aroA2 aroA	Tyrosine, Tryptophan, and Phenylalanine Metabolism	1	-1000	1000	0	2	2.5.1.19
SHK3Dr	shikimate dehydrogenase	3dhsk[c] + h[c] + nadph[c] <=> nadp[c] + skm[c]	SCO1498	SCO1498	aroE	Tyrosine, Tryptophan, and Phenylalanine Metabolism	1	-1000	1000	0	2	1.1.1.25
SHKK	shikimate kinase	atp[c] + skm[c] -> adp[c] + h[c] + skm5p[c]	SCO1495	SCO1495	aroK	Tyrosine, Tryptophan, and Phenylalanine Metabolism	0	0	1000	0	2	2.7.1.71
TRPO2	L-Tryptophan:oxygen 2,3-oxidoreductase (decyclizing)	o2[c] + trp-L[c] -> Lfmkynr[c]	SCO3646	SCO3646	kynA	Tyrosine, Tryptophan, and Phenylalanine Metabolism	0	0	1000	0	4	1.13.11.11		Zummo FP, Marineo S, Pace A, Civiletti F, Giardina A, Puglia AM.#2012#Tryptophan catabolism via kynurenine production in Streptomyces coelicolor: identification of three genes coding for the enzymes of tryptophan to anthranilate pathway.#Appl Microbiol Biotechnol.#94#719-728#
TRPS1	tryptophan synthase (indoleglycerol phosphate)	3ig3p[c] + ser-L[c] -> g3p[c] + h2o[c] + trp-L[c]	(SCO2036 and SCO2037)	SCO2036 SCO2037	trpA trpB	Tyrosine, Tryptophan, and Phenylalanine Metabolism	0	0	1000	0	2	4.2.1.20
TRPS2	tryptophan synthase (indole)	indole[c] + ser-L[c] -> h2o[c] + trp-L[c]	(SCO2036 and SCO2037)	SCO2036 SCO2037	trpA trpB	Tyrosine, Tryptophan, and Phenylalanine Metabolism	0	0	1000	0	2	4.2.1.20
TRPS3	tryptophan synthase (indoleglycerol phosphate)	3ig3p[c] -> g3p[c] + indole[c]	(SCO2036 and SCO2037)	SCO2036 SCO2037	trpA trpB	Tyrosine, Tryptophan, and Phenylalanine Metabolism	0	0	1000	0	2	4.2.1.20
TYRTA	tyrosine transaminase	akg[c] + tyr-L[c] <=> 34hpp[c] + glu-L[c]	(SCO1859 or SCO2053 or SCO3944 or SCO4645 or SCO3658)	SCO1859 SCO2053 SCO3944 SCO4645 SCO3658	hisC1 hisC2 aspC	Tyrosine, Tryptophan, and Phenylalanine Metabolism	1	-1000	1000	0	2	2.6.1.5
ACONIs	aconitate isomerase (spontaneous)	acon-T[c] <=> acon-C[c]	s0001	s0001	SPONTANEOUS	Unassigned	1	-1000	1000	0	1	5.3.3.7	Spontaneous reaction
ACONMT	Trans-aconitate methyltransferase	acon-T[c] + amet[c] -> aconm[c] + ahcys[c]	SCO3132	SCO3132	tam	Unassigned	0	0	1000	0	2
ATPM	ATP maintenance requirement	atp[c] + h2o[c] -> adp[c] + h[c] + pi[c]				Unassigned	0	2.65	1000	0	1
BETALDHx	betaine-aldehyde dehydrogenase	betald[c] + h2o[c] + nad[c] -> glyb[c] + 2 h[c] + nadh[c]	SCO4828	SCO4828	gbsA	Unassigned	0	0	1000	0	2	1.2.1.8
BETALDHy	betaine-aldehyde dehydrogenase	betald[c] + h2o[c] + nadp[c] -> glyb[c] + 2 h[c] + nadph[c]	SCO4828	SCO4828	gbsA	Unassigned	0	0	1000	0	2	1.2.1.8
CAT	catalase	2 h2o2[c] -> 2 h2o[c] + o2[c]	(SCO0379 or SCO0560 or (SCO0666 and SCO2529) or SCO6204 or SCO7590)	SCO0379 SCO0560 SCO0666 SCO2529 SCO6204 SCO7590	katA cpeB catB smpA katA2	Unassigned	0	0	1000	0	4	1.11.1.6		Cho YH, Roe JH.#1997#Isolation and expression of the catA gene encoding the major vegetative catalase in Streptomyces coelicolor Müller.#J Bacteriol.#179#4049-4052##Hahn JS, Oh SY, Roe JH.#2000#Regulation of the furA and catC operon, encoding a ferric uptake regulator homologue and catalase-peroxidase, respectively, in Streptomyces coelicolor A3(2).#J Bacteriol.#182#3767-3774##Cho YH, Lee EJ, Roe…
CCCR	crotonyl-CoA carboxylase/reductase	b2coa[c] + co2[c] + nadph[c] -> emcoa-S[c] + nadp[c]	SCO6473	SCO6473		Unassigned	0	0	1000	0	2	1.3.1.85
CHOLD	choline dehydrogenase	chol[c] + nad[c] -> betald[c] + h[c] + nadh[c]	SCO4829	SCO4829		Unassigned	0	0	1000	0	2	1.1.99.1
EMCCCM	(2R)-ethylmalonyl-CoA CoA-carbonylmutase	emcoa-R[c] <=> mscoa-S[c]	SCO6472	SCO6472		Unassigned	1	-1000	1000	0	2
EME	ethylmalonyl-CoA epimerase	emcoa-S[c] <=> emcoa-R[c]	SCO5398	SCO5398		Unassigned	1	-1000	1000	0	2	5.1.99.1
GTHPi	glutathione peridoxase	2 gthrd[c] + h2o2[c] -> gthox[c] + 2 h2o[c]	SCO4444	SCO4444		Unassigned	0	0	1000	0	2	1.11.1.9
HCO3E	HCO3 equilibration reaction	co2[c] + h2o[c] <=> h[c] + hco3[c]	(SCO2093 or SCO3562 or SCO3721 or SCO6055)	SCO2093 SCO3562 SCO3721 SCO6055		Unassigned	1	-1000	1000	0	2	4.2.1.1
PRDX	Peroxidase (multiple substrates)	h2o2[c] + meoh[c] -> fald[c] + 2 h2o[c]	SCO0560	SCO0560	cpeB	Unassigned	0	0	1000	0	4	1.11.1.7		Hahn JS, Oh SY, Roe JH.#2000#Regulation of the furA and catC operon, encoding a ferric uptake regulator homologue and catalase-peroxidase, respectively, in Streptomyces coelicolor A3(2).#J Bacteriol.#182#3767-3774#
SPODM	superoxide dismutase	2 h[c] + 2 o2s[c] -> h2o2[c] + o2[c]	(SCO0999 or SCO2633 or SCO5254)	SCO0999 SCO2633 SCO5254	sodF2 sodF sodN	Unassigned	0	0	1000	0	4	1.15.1.1		Chung HJ, Kim EJ, Suh B, Choi JH, Roe JH.#1999#Duplicate genes for Fe-containing superoxide dismutase in Streptomyces coelicolor A3(2).#Gene.#231#87-93##Kim EJ, Chung HJ, Suh B, Hah YC, Roe JH.#1998#Transcriptional and post-transcriptional regulation by nickel of sodN gene encoding nickel-containing superoxide dismutase from Streptomyces coelicolor Müller.#Mol Microbiol.#27#187-195#
THIORDXi	hydrogen peroxide reductase (thioredoxin)	h2o2[c] + trdrd[c] -> 2 h2o[c] + trdox[c]	(((SCO2901 or SCO7353) and (SCO0885 or SCO3889 or SCO5419 or SCO5438)) or SCO4444)	SCO2901 SCO7353 SCO0885 SCO3889 SCO5419 SCO5438 SCO4444	trxA3 trxA trxA4 trxA2	Unassigned	0	0	1000	0	2
URIC	uricase	2 h2o[c] + o2[c] + urate[c] -> alltn[c] + co2[c] + h2o2[c]	(SCO6210 and SCO6211)	SCO6210 SCO6211		Unassigned	0	0	1000	0	2	1.7.3.3
REDS1	Malonyl-CoA-ACP transacylase (undecylprodigiosin ACP (redQ))	ACPredQ[c] + malcoa[c] <=> coa[c] + malACPredQ[c]	(SCO2387 and SCO5887)	SCO2387 SCO5887	fabD redQ	Undecylprodigiosin Biosynthesis	1	-1000	1000	0	2	2.3.1.39		Keatinge-Clay AT, Shelat AA, Savage DF, Tsai SC, Miercke LJ, O'Connell JD 3rd, Khosla C, Stroud RM.#2003#Catalysis, specificity, and ACP docking site of Streptomyces coelicolor malonyl-CoA:ACP transacylase.#Structure.#11#147-154#
REDS10	3-oxoacyl-[acyl-carrier-protein] synthase (n-C8:0)	h[c] + hexACPredQ[c] + malACPredQ[c] -> 3ooctACPredQ[c] + ACPredQ[c] + co2[c]	SCO5886	SCO5886	redR	Undecylprodigiosin Biosynthesis	0	0	1000	0	3	2.3.1.41		Mo S, Sydor PK, Corre C, Alhamadsheh MM, Stanley AE, Haynes SW, Song L, Reynolds KA, Challis GL.#2008#Elucidation of the Streptomyces coelicolor pathway to 2-undecylpyrrole, a key intermediate in undecylprodiginine and streptorubin B biosynthesis.#Chem Biol.#15#137-148#
REDS11	3-oxoacyl-[acyl-carrier-protein] reductase (n-C8:0)	3ooctACPredQ[c] + h[c] + nadph[c] <=> 3hoctACPredQ[c] + nadp[c]	(SCO1815 or SCO1345 or SCO1346 or SCO4501 or SCO1831 or SCO4681 or SCO0330)	SCO1815 SCO1345 SCO1346 SCO4501 SCO1831 SCO4681 SCO0330	fabG fabG2 fabG3	Undecylprodigiosin Biosynthesis	1	-1000	1000	0	4	1.1.1.100		Tang Y, Lee HY, Tang Y, Kim CY, Mathews I, Khosla C.#2006#Structural and functional studies on SCO1815: a beta-ketoacyl-acyl carrier protein reductase from Streptomyces coelicolor A3(2).#Biochemistry.#45#14085-14093#
REDS12	3-hydroxyacyl-[acyl-carrier-protein] dehydratase (n-C8:0)	3hoctACPredQ[c] -> h2o[c] + toct2eACPredQ[c]				Undecylprodigiosin Biosynthesis	0	0	1000	0	1	4.2.1.58	Required to produce undecylprodigiosin
REDS13x	enoyl-[acyl-carrier-protein] reductase (NADH) (n-C8:0)	h[c] + nadh[c] + toct2eACPredQ[c] -> nad[c] + ocACPredQ[c]	SCO1814	SCO1814	inhA	Undecylprodigiosin Biosynthesis	0	0	1000	0	2	1.3.1.9
REDS13y	enoyl-[acyl-carrier-protein] reductase (NADPH) (n-C8:0)	h[c] + nadph[c] + toct2eACPredQ[c] -> nadp[c] + ocACPredQ[c]	SCO1814	SCO1814	inhA	Undecylprodigiosin Biosynthesis	0	0	1000	0	2	1.3.1.10
REDS14	3-oxoacyl-[acyl-carrier-protein] synthase (n-C10:0)	h[c] + malACPredQ[c] + ocACPredQ[c] -> 3odecACPredQ[c] + ACPredQ[c] + co2[c]	SCO5886	SCO5886	redR	Undecylprodigiosin Biosynthesis	0	0	1000	0	3	2.3.1.41		Mo S, Sydor PK, Corre C, Alhamadsheh MM, Stanley AE, Haynes SW, Song L, Reynolds KA, Challis GL.#2008#Elucidation of the Streptomyces coelicolor pathway to 2-undecylpyrrole, a key intermediate in undecylprodiginine and streptorubin B biosynthesis.#Chem Biol.#15#137-148#
REDS15	3-oxoacyl-[acyl-carrier-protein] reductase (n-C10:0)	3odecACPredQ[c] + h[c] + nadph[c] <=> 3hdecACPredQ[c] + nadp[c]	(SCO1815 or SCO1345 or SCO1346 or SCO4501 or SCO1831 or SCO4681 or SCO0330)	SCO1815 SCO1345 SCO1346 SCO4501 SCO1831 SCO4681 SCO0330	fabG fabG2 fabG3	Undecylprodigiosin Biosynthesis	1	-1000	1000	0	4	1.1.1.100		Tang Y, Lee HY, Tang Y, Kim CY, Mathews I, Khosla C.#2006#Structural and functional studies on SCO1815: a beta-ketoacyl-acyl carrier protein reductase from Streptomyces coelicolor A3(2).#Biochemistry.#45#14085-14093#
REDS16	3-hydroxyacyl-[acyl-carrier-protein] dehydratase (n-C10:0)	3hdecACPredQ[c] -> h2o[c] + tdec2eACPredQ[c]				Undecylprodigiosin Biosynthesis	0	0	1000	0	1	4.2.1.58	Required to produce undecylprodigiosin
REDS17x	enoyl-[acyl-carrier-protein] reductase (NADH) (n-C10:0)	h[c] + nadh[c] + tdec2eACPredQ[c] -> dcaACPredQ[c] + nad[c]	SCO1814	SCO1814	inhA	Undecylprodigiosin Biosynthesis	0	0	1000	0	2	1.3.1.9
REDS17y	enoyl-[acyl-carrier-protein] reductase (NADPH) (n-C10:0)	h[c] + nadph[c] + tdec2eACPredQ[c] -> dcaACPredQ[c] + nadp[c]	SCO1814	SCO1814	inhA	Undecylprodigiosin Biosynthesis	0	0	1000	0	2	1.3.1.10
REDS18	3-oxoacyl-[acyl-carrier-protein] synthase (n-C12:0)	dcaACPredQ[c] + h[c] + malACPredQ[c] -> 3oddecACPredQ[c] + ACPredQ[c] + co2[c]	SCO5886	SCO5886	redR	Undecylprodigiosin Biosynthesis	0	0	1000	0	3	2.3.1.41		Mo S, Sydor PK, Corre C, Alhamadsheh MM, Stanley AE, Haynes SW, Song L, Reynolds KA, Challis GL.#2008#Elucidation of the Streptomyces coelicolor pathway to 2-undecylpyrrole, a key intermediate in undecylprodiginine and streptorubin B biosynthesis.#Chem Biol.#15#137-148#
REDS19	3-oxoacyl-[acyl-carrier-protein] reductase (n-C12:0)	3oddecACPredQ[c] + h[c] + nadph[c] <=> 3hddecACPredQ[c] + nadp[c]	(SCO1815 or SCO1345 or SCO1346 or SCO4501 or SCO1831 or SCO4681 or SCO0330)	SCO1815 SCO1345 SCO1346 SCO4501 SCO1831 SCO4681 SCO0330	fabG fabG2 fabG3	Undecylprodigiosin Biosynthesis	1	-1000	1000	0	4	1.1.1.100		Tang Y, Lee HY, Tang Y, Kim CY, Mathews I, Khosla C.#2006#Structural and functional studies on SCO1815: a beta-ketoacyl-acyl carrier protein reductase from Streptomyces coelicolor A3(2).#Biochemistry.#45#14085-14093#
REDS2	beta-ketoacyl-ACP synthase (2) (undecylprodigiosin ACP)	accoa[c] + h[c] + malACPredQ[c] -> actACPredQ[c] + co2[c] + coa[c]	(SCO5888 and SCO5887)	SCO5888 SCO5887	redP redQ	Undecylprodigiosin Biosynthesis	0	0	1000	0	4			Singh R, Mo S, Florova G, Reynolds KA.#2012#Streptomyces coelicolor RedP and FabH enzymes, initiating undecylprodiginine and fatty acid biosynthesis, exhibit distinct acyl-CoA and malonyl-acyl carrier protein substrate specificities.#FEMS Microbiol Lett.#328#32-38#
REDS20	3-hydroxyacyl-[acyl-carrier-protein] dehydratase (n-C12:0)	3hddecACPredQ[c] -> h2o[c] + tddec2eACPredQ[c]				Undecylprodigiosin Biosynthesis	0	0	1000	0	1	4.2.1.58	Required to produce undecylprodigiosin
REDS21x	enoyl-[acyl-carrier-protein] reductase (NADH) (n-C12:0)	h[c] + nadh[c] + tddec2eACPredQ[c] -> ddcaACPredQ[c] + nad[c]	SCO1814	SCO1814	inhA	Undecylprodigiosin Biosynthesis	0	0	1000	0	2	1.3.1.9
REDS21y	enoyl-[acyl-carrier-protein] reductase (NADPH) (n-C12:0)	h[c] + nadph[c] + tddec2eACPredQ[c] -> ddcaACPredQ[c] + nadp[c]	SCO1814	SCO1814	inhA	Undecylprodigiosin Biosynthesis	0	0	1000	0	2	1.3.1.10
REDS22	dodecanoyl-redQ thioesterase	ddcaACPredQ[c] + h2o[c] -> ddca[c] + h[c] + ACPredQ[c]	SCO5894	SCO5894	redJ	Undecylprodigiosin Biosynthesis	0	0	1000	0	4			Whicher JR, Florova G, Sydor PK, Singh R, Alhamadsheh M, Challis GL, Reynolds KA, Smith JL.#2011#Structure and function of the RedJ protein, a thioesterase from the prodiginine biosynthetic pathway in Streptomyces coelicolor.#J Biol Chem.#286#22558-22569#
REDS23	acyl-[acyl-carrier-protein] synthetase (n-C12:0)	ACPredL[c] + atp[c] + ddca[c] -> amp[c] + ddcaACPredL[c] + ppi[c]	SCO5892	SCO5892	redL	Undecylprodigiosin Biosynthesis	0	0	1000	0	3	6.2.1.20		Mo S, Sydor PK, Corre C, Alhamadsheh MM, Stanley AE, Haynes SW, Song L, Reynolds KA, Challis GL.#2008#Elucidation of the Streptomyces coelicolor pathway to 2-undecylpyrrole, a key intermediate in undecylprodiginine and streptorubin B biosynthesis.#Chem Biol.#15#137-148#
REDS24	dodecanoyl imtermediate transferase	ddcaACPredQ[c] + ACPredL[c] -> ACPredQ[c] + ddcaACPredL[c]	SCO5892	SCO5892	redL	Undecylprodigiosin Biosynthesis	0	0	1000	0	3			Mo S, Sydor PK, Corre C, Alhamadsheh MM, Stanley AE, Haynes SW, Song L, Reynolds KA, Challis GL.#2008#Elucidation of the Streptomyces coelicolor pathway to 2-undecylpyrrole, a key intermediate in undecylprodiginine and streptorubin B biosynthesis.#Chem Biol.#15#137-148#
REDS25	3-oxoacyl-[acyl-carrier-protein] synthase (n-C14:0)	ddcaACPredL[c] + h[c] + malcoa[c] -> 3omrsACPredL[c] + co2[c] + coa[c]	SCO5892	SCO5892	redL	Undecylprodigiosin Biosynthesis	0	0	1000	0	3	2.3.1.41		Mo S, Sydor PK, Corre C, Alhamadsheh MM, Stanley AE, Haynes SW, Song L, Reynolds KA, Challis GL.#2008#Elucidation of the Streptomyces coelicolor pathway to 2-undecylpyrrole, a key intermediate in undecylprodiginine and streptorubin B biosynthesis.#Chem Biol.#15#137-148#
REDS26	glycine acyltransferase/alpha-oxoamine synthase	3omrsACPredL[c] + gly[c] -> upn[c] + ACPredL[c] + h2o[c] + co2[c]	SCO5892	SCO5892	redL	Undecylprodigiosin Biosynthesis	0	0	1000	0	3			Mo S, Sydor PK, Corre C, Alhamadsheh MM, Stanley AE, Haynes SW, Song L, Reynolds KA, Challis GL.#2008#Elucidation of the Streptomyces coelicolor pathway to 2-undecylpyrrole, a key intermediate in undecylprodiginine and streptorubin B biosynthesis.#Chem Biol.#15#137-148#
REDS27	2-undecyl-4-pyrrolinone reductase/dehydratase	upn[c] + nadh[c] + h[c] -> up[c] + nad[c] + h2o[c]	SCO5893	SCO5893	redK	Undecylprodigiosin Biosynthesis	0	0	1000	0	3			Mo S, Sydor PK, Corre C, Alhamadsheh MM, Stanley AE, Haynes SW, Song L, Reynolds KA, Challis GL.#2008#Elucidation of the Streptomyces coelicolor pathway to 2-undecylpyrrole, a key intermediate in undecylprodiginine and streptorubin B biosynthesis.#Chem Biol.#15#137-148#
REDS28	L-prolyladenylate synthase	atp[c] + h[c] + pro-L[c] -> proamp[c] + ppi[c]	SCO5891	SCO5891	redM	Undecylprodigiosin Biosynthesis	0	0	1000	0	3			Stanley AE, Walton LJ, Kourdi Zerikly M, Corre C, Challis GL.#2006#Elucidation of the Streptomyces coelicolor pathway to 4-methoxy-2,2'-bipyrrole-5-carboxaldehyde, an intermediate in prodiginine biosynthesis.#Chem Commun (Camb).#14#3981-3983#
REDS29	L-prolyladenylate-PCP transaminoacylase	proamp[c] + PCPredO[c] -> proPCPredO[c] + amp[c] + h[c]	SCO5889	SCO5889	redO	Undecylprodigiosin Biosynthesis	0	0	1000	0	2			Cerdeño AM, Bibb MJ, Challis GL.#2001#Analysis of the prodiginine biosynthesis gene cluster of Streptomyces coelicolor A3(2): new mechanisms for chain initiation and termination in modular multienzymes.#Chem Biol.#8#817-829#
REDS3	3-oxoacyl-[acyl-carrier-protein] reductase (n-C4:0)	actACPredQ[c] + h[c] + nadph[c] <=> 3haACPredQ[c] + nadp[c]	(SCO1815 or SCO1345 or SCO1346 or SCO4501 or SCO1831 or SCO4681 or SCO0330)	SCO1815 SCO1345 SCO1346 SCO4501 SCO1831 SCO4681 SCO0330	fabG fabG2 fabG3	Undecylprodigiosin Biosynthesis	1	-1000	1000	0	4	1.1.1.100		Tang Y, Lee HY, Tang Y, Kim CY, Mathews I, Khosla C.#2006#Structural and functional studies on SCO1815: a beta-ketoacyl-acyl carrier protein reductase from Streptomyces coelicolor A3(2).#Biochemistry.#45#14085-14093#
REDS30	L-prolyl-RedO oxidase	proPCPredO[c] + 2 fad[c] -> pyrPCPredO[c] + 2 fadh2[c] + h[c]	SCO5879	SCO5879	redW	Undecylprodigiosin Biosynthesis	0	0	1000	0	3			Stanley AE, Walton LJ, Kourdi Zerikly M, Corre C, Challis GL.#2006#Elucidation of the Streptomyces coelicolor pathway to 4-methoxy-2,2'-bipyrrole-5-carboxaldehyde, an intermediate in prodiginine biosynthesis.#Chem Commun (Camb).#14#3981-3983#
REDS31	pyrrole-2-carboxyl intermediate transferase	pyrPCPredO[c] + KSredX[c] -> PCPredO[c] + pyrKSredX[c]	SCO5878	SCO5878	redX	Undecylprodigiosin Biosynthesis	0	0	1000	0	3			Stanley AE, Walton LJ, Kourdi Zerikly M, Corre C, Challis GL.#2006#Elucidation of the Streptomyces coelicolor pathway to 4-methoxy-2,2'-bipyrrole-5-carboxaldehyde, an intermediate in prodiginine biosynthesis.#Chem Commun (Camb).#14#3981-3983#
REDS32	Malonyl-CoA-ACP transacylase (undecylprodigiosin ACP (redN))	ACPredN[c] + malcoa[c] <=> coa[c] + malACPredN[c]	(SCO2387 and SCO5890)	SCO2387 SCO5890	fabD redN	Undecylprodigiosin Biosynthesis	1	-1000	1000	0	3	2.3.1.39		Stanley AE, Walton LJ, Kourdi Zerikly M, Corre C, Challis GL.#2006#Elucidation of the Streptomyces coelicolor pathway to 4-methoxy-2,2'-bipyrrole-5-carboxaldehyde, an intermediate in prodiginine biosynthesis.#Chem Commun (Camb).#14#3981-3983#
REDS33	beta-keto-beta-pyrrolyl-propanoyl-[acyl-carrier-protein] synthase	pyrKSredX[c] + h[c] + malACPredN[c] -> KSredX[c] + kppACPredN[c] + co2[c]	(SCO5878 and SCO5890)	SCO5878 SCO5890	redX redN	Undecylprodigiosin Biosynthesis	0	0	1000	0	3			Stanley AE, Walton LJ, Kourdi Zerikly M, Corre C, Challis GL.#2006#Elucidation of the Streptomyces coelicolor pathway to 4-methoxy-2,2'-bipyrrole-5-carboxaldehyde, an intermediate in prodiginine biosynthesis.#Chem Commun (Camb).#14#3981-3983#
REDS34	L-serine acyltransferase/alpha-oxoamine synthase	kppACPredN[c] + ser-L[c] -> hbm[c] + ACPredN[c] + h2o[c] + co2[c]	SCO5890	SCO5890	redN	Undecylprodigiosin Biosynthesis	0	0	1000	0	3			Stanley AE, Walton LJ, Kourdi Zerikly M, Corre C, Challis GL.#2006#Elucidation of the Streptomyces coelicolor pathway to 4-methoxy-2,2'-bipyrrole-5-carboxaldehyde, an intermediate in prodiginine biosynthesis.#Chem Commun (Camb).#14#3981-3983#
REDS35	4-hydroxy-2,2'-bipyrrole-5-methanol methyltransferase	hbm[c] + amet[c] -> mbm[c] + ahcys[c] + h[c]	SCO5895	SCO5895	redI	Undecylprodigiosin Biosynthesis	0	0	1000	0	2			Cerdeño AM, Bibb MJ, Challis GL.#2001#Analysis of the prodiginine biosynthesis gene cluster of Streptomyces coelicolor A3(2): new mechanisms for chain initiation and termination in modular multienzymes.#Chem Biol.#8#817-829#
REDS36	4-methoxy-2,2'-bipyrrole-5-methanol dehydrogenase	mbm[c] + nad[c] -> mbc[c] + nadh[c] + h[c]				Undecylprodigiosin Biosynthesis	0	0	1000	0	1		Required to produce undecylprodigiosin
[truncated: 55 more rows]

## Sheet: metabolites
Metabolite name	Metabolite description	Neutral metabolite formula	Charged metabolite formula	Metabolite charge	Metabolite Compartment	Metabolite KeggID	Metabolite PubChemID	Metabolite CheBI ID	Inchi string	Smiles
[truncated: 1,438 more rows]
